# Supplementary material for: Variation of effect estimates in the analysis of mortality and length of hospital stay in patients with infections caused by bacteria-producing extended-spectrum beta-lactamases: a systematic review and meta-analysis
Source: PubMed Central journal article supplement — BMJ Open. 2020 Jan 20;10(1):e030266. doi: 10.1136/bmjopen-2019-030266 (PMC7044956; doi:10.1136/bmjopen-2019-030266), 2020-01-20
Supplement: bmjopen-2019-030266.draft_revisions.pdf [file bmjopen-2019-030266.draft_revisions.pdf]

# BMJ Open

BMJ Open is committed to open peer review. As part of this commitment we make the peer review history of every article we publish publicly available.

When an article is published we post the peer reviewers' comments and the authors' responses online. We also post the versions of the paper that were used during peer review. These are the versions that the peer review comments apply to.

The versions of the paper that follow are the versions that were submitted during the peer review process. They are not the versions of record or the final published versions. They should not be cited or distributed as the published version of this manuscript.

BMJ Open is an open access journal and the full, final, typeset and author-corrected version of record of the manuscript is available on our site with no access controls, subscription charges or pay-per-view fees (<http://bmjopen.bmj.com>).

If you have any questions on BMJ Open's open peer review process please email [info.bmjopen@bmj.com](mailto:info.bmjopen@bmj.com)

# BMJ Open

## Variation of effect estimates in the analysis of mortality and length of hospital stay in patients with infections caused by bacteria producing extended-spectrum beta-lactamases: a systematic review and meta-analysis

|                               |                                                                                                                                                                                                                                                                                                                                                                                                                                                                                                                                                                                                                                                                                                                                                                                                                                                                                                                                                                                                                                                                                                                                            |
|-------------------------------|--------------------------------------------------------------------------------------------------------------------------------------------------------------------------------------------------------------------------------------------------------------------------------------------------------------------------------------------------------------------------------------------------------------------------------------------------------------------------------------------------------------------------------------------------------------------------------------------------------------------------------------------------------------------------------------------------------------------------------------------------------------------------------------------------------------------------------------------------------------------------------------------------------------------------------------------------------------------------------------------------------------------------------------------------------------------------------------------------------------------------------------------|
| Journal:                      | <i>BMJ Open</i>                                                                                                                                                                                                                                                                                                                                                                                                                                                                                                                                                                                                                                                                                                                                                                                                                                                                                                                                                                                                                                                                                                                            |
| Manuscript ID                 | bmjopen-2019-030266                                                                                                                                                                                                                                                                                                                                                                                                                                                                                                                                                                                                                                                                                                                                                                                                                                                                                                                                                                                                                                                                                                                        |
| Article Type:                 | Research                                                                                                                                                                                                                                                                                                                                                                                                                                                                                                                                                                                                                                                                                                                                                                                                                                                                                                                                                                                                                                                                                                                                   |
| Date Submitted by the Author: | 07-Mar-2019                                                                                                                                                                                                                                                                                                                                                                                                                                                                                                                                                                                                                                                                                                                                                                                                                                                                                                                                                                                                                                                                                                                                |
| Complete List of Authors:     | Shamsrizi, Parichehr; University Hospital Tubingen Department of Internal Medicine I Gastroenterology Hepatology and Infectious Diseases, Division of Infectious Disease<br>Gladstone, Beryl Primrose ; University Hospital Tubingen Department of Internal Medicine I Gastroenterology Hepatology and Infectious Diseases, Division of Infectious Disease<br>Carrara, Elena; Integrated University Hospital of Verona, Division of Infectious Disease, Department of Diagnostic and Public Health<br>Luise, Dora; Integrated University Hospital of Verona, Division of Infectious Disease, Department of Diagnostic and Public Health<br>Cona, Andrea; ASST Santi Paolo e Carlo, Clinic of Infectious and Tropical Diseases, Department of Health Sciences<br>Bovo, Chiara; Integrated University Hospital of Verona, Medical Direction<br>Tacconelli, Evelina; University Hospital Tubingen Department of Internal Medicine I Gastroenterology Hepatology and Infectious Diseases, Division of Infectious Disease; Integrated University Hospital of Verona, Division of Infectious Disease, Department of Diagnostic and Public Health |
| Keywords:                     | Extended-spectrum beta-lactamase, mortality, bloodstream infection, length of stay, meta-analysis, systematic review                                                                                                                                                                                                                                                                                                                                                                                                                                                                                                                                                                                                                                                                                                                                                                                                                                                                                                                                                                                                                       |
|                               |                                                                                                                                                                                                                                                                                                                                                                                                                                                                                                                                                                                                                                                                                                                                                                                                                                                                                                                                                                                                                                                                                                                                            |

SCHOLARONE™  
Manuscripts

1  
2  
3 **Variation of effect estimates in the analysis of mortality and length of hospital stay in**  
4 **patients with infections caused by bacteria producing extended-spectrum beta-**  
5 **lactamases: a systematic review and meta-analysis**  
6  
7  
8  
9

10 **AUTHORS:**

11 Parichehr Shamsrizi<sup>1</sup>, Beryl Primrose Gladstone<sup>1</sup>, Elena Carrara<sup>2</sup>, Dora Luise<sup>2</sup>, Andrea Cona<sup>3</sup>,  
12 Chiara Bovo<sup>4</sup>, Evelina Tacconelli<sup>1,2</sup>  
13  
14  
15

16 **AFFILIATIONS:**

- 17  
18  
19 1) Division of Infectious Disease, Department of Internal Medicine I, DZIF Partner site,  
20 Tübingen University Hospital, Tübingen, Germany  
21  
22 2) Division of Infectious Disease, Department of Diagnostic and Public Health, University  
23 Hospital of Verona, Verona, Italy  
24  
25 3) Clinic of Infectious and Tropical Diseases, Department of Health Sciences, ASST Santi  
26 Paolo e Carlo, University of Milan, Milan, Italy.  
27  
28 4) Medical Direction, University Hospital of Verona, Verona, Italy  
29  
30  
31

32 **CORRESPONDING AUTHOR:** Elena Carrara, MD

33  
34 **Address:** Division of Infectious Disease, Department of Diagnostic and Public Health,  
35 University Hospital of Verona, Verona, Italy  
36 Piazzale L.A. Scuro 10, Dipartimento di Malattie Infettive, Policlinico Borgo Roma, 37100  
37 Verona, Italy.  
38  
39

40  
41 **Phone number:** +39 3339566252

42  
43 **Email:** elena.carrara@univr.it  
44  
45

46 **WORD COUNT:** 2372  
47  
48  
49  
50  
51  
52  
53  
54  
55  
56  
57  
58  
59  
60

## ABSTRACT

**Objective** To assess the variation of effect estimates in the analysis of mortality and length of stay (LOS) in patients with infections caused by extended-spectrum beta-lactamase (ESBL)-producing Enterobacteriaceae.

**Design** Systematic review and meta-analysis

**Methods** Literature search for clinical studies from 1 January 1960 to 1 October 2018 was conducted in PubMed. Primary outcomes were risk ratios (RRs) of all-cause and attributable mortality and weighted mean differences (WMDs) in LOS in patients with bloodstream infections (BSIs) and non-invasive infections. Any change in the effect estimates was assessed by grouping studies according to design, setting, economy-based country classification, reporting period, microbiological aetiology, infection type, and adjustment for appropriateness of empirical treatment. The impact of ESBL production was calculated using random effect meta-analysis and heterogeneity was evaluated by  $I^2$  statistics.

**Results** Eighty-four studies including 22,030 patients and 149 outcome measures were included in the meta-analysis. Most studies were retrospective cohorts from high-income countries, providing unadjusted estimates. ESBL production in patients with BSIs (56 studies) increased the RR for all-cause mortality by a factor of 1.70 (95% CI: 1.52-1.90;  $p < 0.001$ ), attributable mortality (16 studies) by 1.75 (95% CI: 1.448-2.108;  $p < 0.001$ ), and WMD in the intensive care unit by 3.07 days (95% CI: 1.61-4.54;  $p < 0.001$ ). WMD in hospital LOS was significantly higher in BSIs (4.41 days; 95% CI: 3.37-5.46;  $p < 0.001$ ) and non-invasive infections (2.19 days; 95% CI: 1.56-2.81;  $p < 0.001$ ). Subgroup analyses showed variation of estimates by study design, population, strain, and assessment of appropriateness of empiric treatment. High heterogeneity was observed in all analyses.

**Conclusions** Current evidence of the clinical burden of infections caused by ESBL-producing bacteria is highly heterogeneous and based mainly on unadjusted estimates derived from retrospective studies. Despite these limitations, ESBL production in strains causing BSIs seems associated with higher all-cause and attributable mortality and longer hospitalisation.

## KEYWORDS

Extended-spectrum beta-lactamase, mortality, bloodstream infection, length of stay, meta-analysis, systematic review

### STRENGTHS AND LIMITATIONS OF THIS STUDY

- ▶ Evidence of the impact of ESBL production on mortality and length of stay in strains causing invasive and non-invasive infections was collected systematically.
- ▶ Effect of multiple epidemiological and clinical variables was assessed in the calculation of estimates.
- ▶ Heterogeneity among studies was assessed.
- ▶ Only few studies had been performed in high-risk populations or low-income countries.

For peer review only

## INTRODUCTION

Infections caused by extended-spectrum beta-lactamase (ESBL)-producing Enterobacteriaceae are responsible for high morbidity and mortality worldwide.<sup>1,2,3</sup> The 2018 World Health Organization list of antibiotic-resistant pathogens identified mortality as the most important criteria to prioritise bacteria for research and development of new, effective antibiotics.<sup>1</sup> In this prioritisation exercise, ESBL-producing Enterobacteriaceae were designated a critical priority because of their high all-cause mortality and high prevalence globally in healthcare-associated and community-acquired infections. The incidence and attributable mortality of multidrug-resistant bacterial infections, including ESBL-producing Enterobacteriaceae, in European countries has been recently estimated using a modelling analysis.<sup>4</sup> In 2015 ESBL-producing *Escherichia coli* was responsible for almost 300,000 infections in Europe and 9,000 attributable deaths, and ESBL-producing *Klebsiella pneumoniae* caused around 70,000 infections and more than 3,500 deaths. The major limitation of this analysis is the sparseness of evidence on mortality due to ESBL-producing bacteria, which was limited largely to studies conducted in high-income countries.

Two systematic reviews have been performed to define the impact of ESBL production on mortality due to Enterobacteriaceae.<sup>2,3</sup> Both meta-analyses included studies targeting bloodstream infections (BSIs) and showed doubling all-cause mortality for ESBL-associated bacteraemia compared to non-ESBL Enterobacteriaceae bacteraemia. A major drawback of the analyses, highlighted by the authors, was the lack of control for confounding and limited adjustment for empiric therapy. No systematic review has been performed to assess attributable mortality and other indicators of clinical impact such as length of stay (LOS).

Because estimates of clinical burden drive policy design for antibiotic stewardship and infection control interventions, precise and current estimates are essential. The objective of this systematic review and meta-analysis was to assess the variation of effect estimates in the analysis of mortality and LOS in patients with infections due to ESBL-producing Enterobacteriaceae.

## METHODS

### Literature search strategy

The search was performed by 2 researchers (BPG and PS) in PubMed on 05 October 2018 using the following search string: (ESBL AND *Escherichia coli* AND mortality) OR (ESBL AND *Klebsiella pneumoniae* AND mortality) OR (ESBL AND *Escherichia coli* AND length

1  
2  
3 of stay OR length of hospitalisation) OR (ESBL AND *Klebsiella pneumoniae* AND length of  
4 stay OR length of hospitalisation). Reference lists of retrieved articles were also searched.

### 7 **Eligibility criteria**

8  
9 We included all clinical studies with a comparison group assessing all-cause mortality,  
10 attributable mortality, and overall LOS and intensive care unit stay (ICU) LOS in hospitalised  
11 patients with ESBL infections. Studies published from 1 January 1960 to 1 October 2018  
12 irrespective of the clinical setting and study design were included. The search was restricted  
13 to English language publications. Diagnostic studies, reviews, case reports, non-clinical  
14 studies, and abstracts of conference presentations were not included.

### 20 **Data extraction**

21  
22 Two reviewers (PS and BPG) independently assessed the eligibility of trials and extracted  
23 data. In case of disagreement, a third reviewer (DL) was consulted. Extracted data were  
24 collected in an electronic worksheet, using EpiInfo 7.1: authors, journal, country, year of  
25 publication, year of study, time of data collection, study design, comparison group, study  
26 setting, population, aetiology, type and site of infection, and raw data related to mortality and  
27 LOS/ICU-LOS. Countries were classified as high-, middle-, or low-income using the World  
28 Bank Atlas method.<sup>5</sup> Adjusted effect estimates such as odds ratios (ORs) or hazard ratios and  
29 quality indicators such as reporting of antibiotic therapy, appropriateness of empirical  
30 treatment, resistance mechanisms, and minimum inhibitory concentrations (MICs) were also  
31 extracted.

32  
33 Mortality data were extracted as all-cause mortality or attributable mortality as defined in the  
34 studies. Where available, prespecified time periods for mortality assessment (i.e., 14 days, 28  
35 days, in-hospital) were also extracted. LOS and ICU-LOS were extracted as days with mean  
36 and standard deviation or median and interquartile range.

### 47 **Data analysis**

48  
49 The primary outcomes for the clinical impact of ESBL infections were RRs of all-cause and  
50 attributable mortality and the weighted mean difference (WMD) in LOS and ICU-LOS in  
51 patients with ESBL infections compared with those in patients with non-ESBL infections and,  
52 where available, with uninfected patients. The impact of ESBL production on attributable and  
53 all-cause mortality was calculated with random effect meta-analysis and expressed as RR with  
54 95% confidence interval (CI). WMD in days with 95% CI was calculated to express the  
55 excess in LOS and ICU-LOS. Analysis of mortality focused on BSIs while LOS was  
56  
57  
58  
59  
60

determined for BSIs and non-invasive infections (i.e., urinary tract infections, respiratory tract infections, surgical site infection).

Variation of the effect estimate was assessed by grouping the studies according to the following confounders: mortality time assessment (7 vs 14 days), aetiology (*E. coli* vs *K. pneumoniae*), clinical setting (paediatric, oncology, ICU), economic country areas (high-income countries [HICs] vs low- and medium-income countries [LMICs]), study design, assessment of empiric therapy, and year. Subgroup analysis was computed only if more than 2 studies were available for each group. Heterogeneity was evaluated by using  $I^2$  statistics. Overall significance testing was carried out using Wald tests adjusted using the Bonferroni correction. The unadjusted ORs were compared with the adjusted ORs to estimate the effect of adjustment. Reporting and publication bias was presented in funnel plots (supplementary and tested by Egger's test. Statistical analyses were performed using Stata version 15. All meta-analyses were performed in accordance with the Cochrane Collaboration recommendations<sup>6</sup> and reported according to the PRISMA statement.<sup>7</sup>

The protocol is available online .

([https://im1-tuebingen.de/wp-content/uploads/2019/03/ClinicalImpactAMR\\_SR\\_studyprotocol\\_2018.pdf](https://im1-tuebingen.de/wp-content/uploads/2019/03/ClinicalImpactAMR_SR_studyprotocol_2018.pdf))

### **Patient and Public Involvement**

There was no patient or public involvement in this systematic review of published literature.

### **RESULTS**

Our literature search identified 1006 studies, and 92 (9.2%) met the eligibility criteria on the basis of abstract screening. Full-text screening excluded an additional 5 articles, providing an evidence base of 87 studies (Figure 1).<sup>8-94</sup> The 87 studies included in the qualitative analysis were conducted between 1991 and 2017 in 25 countries, mainly in South Korea (14 studies), Thailand (7), USA (7), Taiwan (7), and Spain (7). Sixty (68.9%) studies were performed in HICs, 26 (29.9%) in LMICs, and 1 included both HICs and LMICs.<sup>54</sup> About half (44, 50.6%) were retrospective cohort studies, 24 (27.6%) case cohort studies, and 18 (20.7%) prospective cohort studies; 1 study had an interventional design.<sup>55</sup> The comparison group was patients with infections caused by gram-negative non-ESBL producers in 82 (94.3%) studies, non-infected patients in 2 (2.3%), and both control groups in 3 (3.5%). Most (57, 65.5%) studies included data from the entire hospital, while a few focused on specific settings, mainly ICUs (9, 10.3%) and paediatric wards (8, 9.2%). The most common ESBL-producing bacteria were



1  
2  
3 *E. coli* (23, 26.4%) and *K. pneumoniae* (17, 19.5%). An overview of study characteristics is  
4 provided in online supplementary table S1.

5  
6  
7 Because data in 3 studies<sup>20,59,85</sup> were insufficient for quantitative analysis, 84 (96.6%) studies  
8 were included in the meta-analysis analysing data from 22,030 patients and 149 outcome  
9 measures. Fifty-seven studies analysed BSIs and 10 non-invasive infections. Study  
10 characteristics for all studies are provided in online supplementary table S2.

### 11 **All-cause mortality**

12  
13  
14  
15  
16 All-cause mortality was reported in 81 studies including 21,942 patients. ESBL production in  
17 patients with BSIs increased all-cause mortality by a factor of 1.70 (95% CI: 1.52-1.90;  
18  $p<0.001$ ;  $I^2=45.3\%$ ). The RR increased over time from 1.56 (95% CI: 1.15-2.11;  $p=0.004$ ) in  
19 1991-1999 to 1.74 (95% CI: 1.50-2.01;  $p<0.001$ ) in 2000-2009, and it was stable in 2010-  
20 2018 (1.72, 95% CI: 1.39-2.13;  $p<0.001$ ). The RR was higher in studies assessing  
21 appropriateness of empiric therapy (RR=1.75; 95% CI 1.54-1.99;  $p<0.001$ ) than in those that  
22 did not (RR=1.55; 95% CI 1.26-1.90;  $p<0.001$ ). The subgroup analysis by pathogen showed  
23 that ESBL production increased the RR in BSIs due to *E. coli* (RR=1.82; 95% CI: 1.50-2.21;  
24  $p<0.001$ ) compared to those due to *K. pneumoniae* (RR=1.48; 95% CI: 1.17-1.87;  $p=0.001$ ).  
25 Stratification by population age showed an higher RR in paediatric population (RR=2.09;  
26 95% CI: 1.62-2.71;  $p<0.001$ ). Effect estimates did not vary significantly by study country,  
27 mortality time assessment (14 vs 28 days), ESBL molecular resistance mechanisms, or study  
28 design (Figure 2 and online supplementary figure S1). Adjusted estimates for inappropriate  
29 empirical antibiotic therapy were provided for 14 studies. The pooled unadjusted OR for all-  
30 cause mortality was 2.91 (95% CI: 2.23-3.81;  $p<0.001$ ,  $I^2=27.1\%$ ;  $p=0.164$ ) and the pooled  
31 OR after adjusting for receipt of appropriate empirical treatment was 3.22 (95% CI: 1.53-  
32 6.76;  $p=0.002$ ;  $I^2=87.5\%$ ;  $p<0.001$ ).

### 33 **Attributable mortality**

34  
35  
36  
37  
38  
39  
40  
41  
42  
43  
44  
45  
46  
47  
48  
49  
50  
51  
52  
53  
54  
55  
56  
57  
58  
59  
60  
Attributable mortality was analysed in 16 studies including 2,885 patients. All studies were  
performed in HICs. ESBL production in patients with BSIs increased the risk of attributable  
mortality by a factor of 1.75 (95% CI: 1.45-2.11;  $p<0.001$ ;  $I^2=0\%$ ). The RR increased over  
time from 1.53 (95% CI: 1.10-2.12;  $p=0.011$ ) in 1991-1999 to 1.91 (95% CI: 1.43-2.54;  
 $p<0.001$ ) in 2000-2009 (Figure 3). Pathogen-specific RR for attributable mortality was 1.60  
(95% CI: 1.18-2.15;  $p=0.002$ ) for *K. pneumoniae* and 1.76 (95% CI: 1.33-2.34;  $p<0.001$ )  
when the gram-negative organisms were analysed all together without species differentiation.

1  
2  
3 The subgroup analysis showed the RR was lower in case cohort studies (1.56; 95% CI: 1.09-  
4 2.25;  $p=0.016$ ) than in cohort studies (1.80; 95% CI: 1.37-2.37;  $p<0.001$ ).  
5  
6

### 7 **Length of stay**

8  
9 LOS data were provided in 37 studies (17 on BSIs and 8 on non-invasive infections)  
10 analysing 38 outcome measures. The WMD of LOS in patients with BSIs was 4.41 days (95%  
11 CI: 3.37-5.46;  $p<0.001$ ) and decreased from 5.72 days (95% CI: 2.69-8.75;  $p<0.001$ ) in 1991-  
12 1999 to 4.22 days (95% CI: 3.02-5.43;  $p<0.001$ ) in 2000-2009 and was stable up to 2018  
13 (4.30 days; 95% CI: 1.38-7.22;  $p=0.004$ ). Higher WMD ( $p<0.001$ ) was observed for BSIs due  
14 to *K. pneumoniae* (7.67 days; 4.63-10.71) than for those due to *E. coli* (6.07 days; 95% CI  
15 3.71-8.43). Retrospective cohort studies reported higher ( $p<0.001$ ) WMD (6.43 days; 95% CI:  
16 4.66-8.21;  $p<0.001$ ) than case cohort studies (3.32 days; 95% CI: 2.03-4.61). Studies in HICs  
17 showed higher WMD (4.56 days; 95% CI 3.43-5.70;  $p<0.001$ ) than studies in LMICs (3.55  
18 days; 95% CI 0.84-6.26;  $p=0.01$ ) (Figure 4).  
19  
20  
21  
22  
23  
24  
25  
26

27 Studies with non-invasive infections reported a WMD of 2.19 days (95% CI: 1.56-2.81;  
28  $p<0.001$ ), which decreased from 7.66 (95% CI: 5.83-9.46;  $p<0.001$ ) in 2000-2009 to 1.44  
29 (95% CI: 0.77-2.10;  $p<0.001$ ) in 2010-2018 (online supplementary figure S3).  
30  
31  
32

33 The data on ICU-LOS were provided in 7 studies and showed that BSIs caused by ESBL  
34 producers had a WMD of LOS of 3.07 days (95% CI: 1.61-4.54;  $p<0.001$ ).  
35  
36

37 Egger's test and the funnel plots (online supplementary figure S4 and S5) showed evidence  
38 for small study effects ( $p<0.001$ ) and publication bias.  
39  
40

### 41 **DISCUSSION**

42  
43 This systematic review shows that ESBL production has a significant impact on the most  
44 relevant patient-related clinical outcomes. In the subgroup analyses, all-cause mortality,  
45 attributable mortality, and LOS both in hospital and in ICU were higher for patients with BSIs  
46 due to ESBL-producing Enterobacteriaceae than for patients with BSIs due to non-ESBL-  
47 producing strains. Non-invasive infections caused by ESBL-producing strains were associated  
48 with prolonged LOS. Within the limitation of the low number of studies evaluating specific  
49 patient populations, paediatric and cancer patients seemed to suffer a higher impact of ESBL  
50 invasive infections than the overall population. Stratifying by pathogen type, the impact of  
51 ESBL production was higher for *E. coli* BSIs than for *K. pneumoniae* BSIs. No relevant  
52 differences in mortality analysis emerged with stratification by study design or country  
53 income level. Impact of ESBL infections on mortality became more evident in more recent  
54  
55  
56  
57  
58  
59  
60

1  
2  
3 studies. Studies reporting on appropriateness of empirical therapy, ESBL resistance  
4 mechanisms, and MICs showed a higher clinical impact of ESBL infections than studies not  
5 assessing these variables. In particular, pooled ORs adjusted for inappropriate empirical  
6 treatment, showed a remarkably higher OR for mortality in patients with ESBL infections.  
7  
8

9  
10 Our findings confirm the results of previous systematic reviews. Schwaber et al. performed a  
11 systematic review comparing mortality in ESBL BSIs and non-ESBL BSIs in studies  
12 published through 2003.<sup>2</sup> The authors show a pooled RR for all-cause mortality of 1.85 but, in  
13 contrast to our study, they combined *E. coli*, *Klebsiella* spp., and *Proteus* spp. in the analysis  
14 because of sample size limitations. Rottier et al. analysed studies published through 2010 and  
15 adjusting results for inappropriate empirical treatment found an adjusted OR of 1.37.<sup>3</sup> Our  
16 study, adding more than 50 studies in 17 years to the Rottier systematic review, confirmed the  
17 clinical importance of ESBL production to all-cause mortality and for the first time assessed  
18 the role of ESBL production on attributable mortality. We addressed relevant confounders  
19 through subgroup analyses and found that population, pathogen, and assessment of empiric  
20 therapy all had an impact on estimates. Because we believe that appropriate empirical  
21 treatment plays a relevant role in invasive infections, we performed a secondary analysis by  
22 pooling only adjusted ORs and confirming the significant impact of antibiotic resistance as  
23 already shown in a previously published systematic review.<sup>95</sup> The impact of ESBL production  
24 on LOS has been also estimated, assessing BSIs and non-invasive infections separately and  
25 confirming the prolongation of hospitalisation.  
26  
27

28  
29 Our study has some limitations. Although results of the meta-analyses were significant in all  
30 the subgroups, we could analyse only a limited number of studies providing information for  
31 subgroups such as haematological patients and low-income countries, making generalizability  
32 of results less certain for these specific patient populations. Only a few studies reported MIC  
33 data or specific ESBL molecular resistant phenotype (i.e., AmpC). Moreover, publication bias  
34 was detected in both the main analyses (all-cause mortality and LOS), thus implying the  
35 possibility that results from small studies with non-significant results might have been  
36 conducted and not published, resulting in a possible overestimation of our results. The non-  
37 homogeneous reporting of some relevant data in published literature (e.g., disease severity  
38 and underlying comorbidities) may also have affected the precision of the estimate. Patients  
39 with ESBL are intrinsically at higher risk of mortality and complications because they are  
40 often older, have more comorbidities or higher antibiotic exposure, and are at higher risk of  
41 receiving inappropriate empirical treatment.<sup>96</sup>  
42  
43  
44  
45  
46  
47  
48  
49  
50  
51  
52  
53  
54  
55  
56  
57  
58  
59  
60

1  
2  
3 In summary, our systematic review emphasises the importance of suspicion and confirmation  
4 of ESBL production as soon as possible for invasive infections and demonstrates that ESBL  
5 production increases the risk of attributable mortality and LOS in both hospital and ICU for  
6 invasive and non-invasive infections. Patients with ESBL infections remain at higher risk of  
7 mortality and prolonged LOS even after adjustment for empiric inappropriate treatment.  
8 Control for other relevant confounders is hindered by the sparseness of published data. Future  
9 studies addressing the clinical burden of drug-resistant infections must include ESBL  
10 production and should assess both the impact of molecular mechanisms of resistance and  
11 effect on specific patient populations such as haematological patients and those in LMIC.  
12  
13  
14  
15  
16  
17  
18

19 **Acknowledgements** We thank Anne McDonough, a professional medical writer who  
20 provided medical writing support funded by the authors.  
21  
22

23 **Author Contributions** ET contributed to the study concept. BPG and PS performed data  
24 analysis. PS and AC extracted data and wrote the first draft of the manuscript. DL contributed  
25 to the first draft of the manuscript. EC and ET wrote the final version of the manuscript. CB  
26 reviewed the paper. All authors read, edited, and approved the final manuscript. The  
27 corresponding author had full access to all the data in the study and had final responsibility  
28 for the decision to submit for publication.  
29  
30  
31  
32

33 **Funding** This work was supported by the German Center for Infection Research Clinical  
34 Research Unit for Health-Care Associated Infections grant number TTU 08.701 and DRIVE-  
35 AB (115618). The funder had no involvement in the study design; in the collection, analysis  
36 and interpretation of the data; in the writing of the report; or in the decision to submit the  
37 paper for publication.  
38  
39  
40  
41

42 **Competing interests** The authors report no competing interests.  
43

44 **Patient consent** Not required  
45

46 **Provenance and peer review** Not commissioned; externally peer reviewed.  
47

48 **Data sharing statement** Requests for data should be addressed to the corresponding author.  
49  
50

51 **Open access** This is an open access article distributed in accordance with the Creative  
52 Commons Attribution Non Commercial (CC BY-NC 4.0) license, which permits others to  
53 distribute, remix, adapt, build upon this work non-commercially, and license their derivative  
54 works on different terms, provided the original work is properly cited, appropriate credit is  
55 given, any changes made indicated, and the use is non-commercial. See: [http://](http://creativecommons.org/licenses/by-nc/4.0/)  
56 [creativecommons.org/licenses/by-nc/4.0/](http://creativecommons.org/licenses/by-nc/4.0/).  
57  
58  
59  
60

1  
2  
3  
4  
5  
6  
7  
8  
9  
10  
11  
12  
13  
14  
15  
16  
17  
18  
19  
20  
21  
22  
23  
24  
25  
26  
27  
28  
29  
30  
31  
32  
33  
34  
35  
36  
37  
38  
39  
40  
41  
42  
43  
44  
45  
46  
47  
48  
49  
50  
51  
52  
53  
54  
55  
56  
57  
58  
59  
60

For peer review only

## REFERENCES

1. Tacconelli E, Carrara E, Savoldi A, et al. Discovery, research, and development of new antibiotics: the WHO priority list of antibiotic-resistant bacteria and tuberculosis. *Lancet Infect Dis* 2018;18:318–27.
2. Schwaber MJ, Carmeli Y. Mortality and delay in effective therapy associated with extended-spectrum beta-lactamase production in Enterobacteriaceae bacteraemia: a systematic review and meta-analysis. *J Antimicrob Chemother* 2007;60:913–20.
3. Rottier WC, Ammerlaan HS, Bonten MJ. Effects of confounders and intermediates on the association of bacteraemia caused by extended-spectrum beta-lactamase-producing Enterobacteriaceae and patient outcome: a meta-analysis. *J Antimicrob Chemother* 2012;67:1311–20.
4. Cassini A, Högberg LD, Plachouras D, et al; Attributable deaths and disability-adjusted life-years caused by infections with antibiotic-resistant bacteria in the EU and the European Economic Area in 2015: a population-level modelling analysis. *Lancet Infect Dis* 2019;19:56–66.
5. The World Bank. What is the World Bank Atlas method? <https://datahelpdesk.worldbank.org/knowledgebase/articles/77933-what-is-the-world-bank-atlas-method>. Accessed January 14, 2019.
6. Higgins JPT, Green S (editors). *Cochrane Handbook for Systematic Reviews of Interventions* Version 5.1.0 [updated March 2011]. The Cochrane Collaboration, 2011. Available from <http://handbook.cochrane.org>.
7. Moher D, Liberati A, Tetzlaff J, et al. Preferred reporting items for systematic reviews and meta-analyses: the PRISMA statement. *BMJ* 2009;339:b2535.
8. Lautenbach E, Patel JB, Bilker WB, et al. Extended-spectrum beta-lactamase-producing *Escherichia coli* and *Klebsiella pneumoniae*: risk factors for infection and impact of resistance on outcomes. *Clin Infect Dis* 2001;32:1162–71.
9. Leistner R, Sakellariou C, Gurntke S, et al. Mortality and molecular epidemiology associated with extended-spectrum beta-lactamase production in *Escherichia coli* from bloodstream infection. *Infect Drug Resist* 2014;7:57–62.
10. Lin JN, Chen YH, Chang LL, et al. Clinical characteristics and outcomes of patients with extended-spectrum beta-lactamase-producing bacteremias in the emergency department. *Intern Emerg Med* 2011;6:547–55.

11. Kim HJ, Park JH, Park DI, et al. Clinical impact of extended-spectrum beta-lactamase-producing Enterobacteriaceae in patients with biliary tract infection. *Dig Dis Sci* 2013;58:841–9.
12. Kim SH, Kwon JC, Choi SM, et al. Escherichia coli and Klebsiella pneumoniae bacteremia in patients with neutropenic fever: factors associated with extended-spectrum beta-lactamase production and its impact on outcome. *Ann Hematol* 2013;92:533–41.
13. Pillay T, Pillay DG, Adhikari M, et al. Piperacillin/tazobactam in the treatment of Klebsiella pneumoniae infections in neonates. *Am J Perinatol* 1998;15:47–51.
14. Kim BN, Woo JH, Kim MN, et al. Clinical implications of extended-spectrum beta-lactamase-producing Klebsiella pneumoniae bacteraemia. *J Hosp Infect* 2002;52:99–106.
15. Kim YK, Pai H, Lee HJ, et al. Bloodstream infections by extended-spectrum beta-lactamase-producing Escherichia coli and Klebsiella pneumoniae in children: epidemiology and clinical outcome. *Antimicrob Agents Chemother* 2002;46:1481–91.
16. Bhavnani SM, Ambrose PG, Craig WA, et al. Outcomes evaluation of patients with ESBL- and non-ESBL-producing Escherichia coli and Klebsiella species as defined by CLSI reference methods: report from the SENTRY Antimicrobial Surveillance Program. *Diagn Microbiol Infect Dis* 2006;54:231–6.
17. Blomberg B, Jureen R, Manji KP, et al. High rate of fatal cases of pediatric septicemia caused by gram-negative bacteria with extended-spectrum beta-lactamases in Dar es Salaam, Tanzania. *J Clin Microbiol* 2005;43:745–9.
18. Panhotra BR, Saxena AK, Al-Ghamdi AM. Extended-spectrum beta-lactamase-producing Klebsiella pneumoniae hospital acquired bacteremia. Risk factors and clinical outcome. *Saudi Med J* 2004;25:1871–6.
19. Marra AR, Wey SB, Castelo A, et al. Nosocomial bloodstream infections caused by Klebsiella pneumoniae: impact of extended-spectrum beta-lactamase (ESBL) production on clinical outcome in a hospital with high ESBL prevalence. *BMC Infect Dis* 2006;6:24.
20. Skippen I, Shemko M, Turton J, et al. Epidemiology of infections caused by extended-spectrum beta-lactamase-producing Escherichia coli and Klebsiella spp.: a nested case-control study from a tertiary hospital in London. *J Hosp Infect* 2006;64:115–23.
21. Schwaber MJ, Navon-Venezia S, Kaye KS, et al. Clinical and economic impact of bacteremia with extended-spectrum-beta-lactamase-producing Enterobacteriaceae. *Antimicrob Agents Chemother* 2006;50:1257–62.

22. Apisarnthanarak A, Kiratisin P, Saifon P, et al. Clinical and molecular epidemiology of community-onset, extended-spectrum beta-lactamase-producing *Escherichia coli* infections in Thailand: a case-case-control study. *Am J Infect Control* 2007;35:606–12.
23. Tumbarello M, Spanu T, Sanguinetti M, et al. Bloodstream infections caused by extended-spectrum-beta-lactamase-producing *Klebsiella pneumoniae*: risk factors, molecular epidemiology, and clinical outcome. *Antimicrob Agents Chemother* 2006;50:498–504.
24. Apisarnthanarak A, Kiratisin P, Saifon P, et al. Risk factors for and outcomes of healthcare-associated infection due to extended-spectrum beta-lactamase-producing *Escherichia coli* or *Klebsiella pneumoniae* in Thailand. *Infect Control Hosp Epidemiol* 2007;28:873–6. doi: 10.1086/518725
25. Kanafani ZA, Mehio-Sibai A, Araj GF, et al. Epidemiology and risk factors for extended-spectrum beta-lactamase-producing organisms: a case control study at a tertiary care center in Lebanon. *Am J Infect Control* 2005;33:326–32.
26. Zaoutis TE, Goyal M, Chu JH, et al. Risk factors for and outcomes of bloodstream infection caused by extended-spectrum beta-lactamase-producing *Escherichia coli* and *Klebsiella* species in children. *Pediatrics* 2005;115:942–9.
27. Loh LC, Nor Izran Hanim Bt Abdul S, Rosdara Masayuni Bt Mohd S, et al. Hospital Outcomes of Adult Respiratory Tract Infections with Extended-Spectrum B-Lactamase (ESBL) Producing *Klebsiella pneumoniae*. *Malays J Med Sci* 2007;14:36–40.
28. Melzer M, Petersen I. Mortality following bacteraemic infection caused by extended spectrum beta-lactamase (ESBL) producing *E. coli* compared to non-ESBL producing *E. coli*. *J Infect* 2007;55:254–9. doi: 10.1016/j.jinf.2007.04.007
29. Song KH, Jeon JH, Park WB, et al. Clinical outcomes of spontaneous bacterial peritonitis due to extended-spectrum beta-lactamase-producing *Escherichia coli* and *Klebsiella* species: a retrospective matched case-control study. *BMC Infect Dis* 2009;9:41.
30. Bennett JW, Robertson JL, Hospenthal DR, et al. Impact of extended spectrum beta-lactamase producing *Klebsiella pneumoniae* infections in severely burned patients. *J Am Coll Surg* 2010;211:391–9.
31. Trecarichi EM, Tumbarello M, Spanu T, et al. Incidence and clinical impact of extended-spectrum-beta-lactamase (ESBL) production and fluoroquinolone resistance in bloodstream infections caused by *Escherichia coli* in patients with hematological malignancies. *J Infect* 2009;58:299–307.
32. Tuon FF, Kruger M, Terreri M, et al. *Klebsiella* ESBL bacteremia-mortality and risk factors. *Braz J Infect Dis* 2011;15:594–8.



- 1  
2  
3 33. Kang CI, Song JH, Chung DR, et al. Risk factors and treatment outcomes of community-  
4 onset bacteraemia caused by extended-spectrum beta-lactamase-producing *Escherichia*  
5 *coli*. *Int J Antimicrob Agents* 2010;36:284–7.  
6  
7
- 8 34. Pena C, Gudiol C, Calatayud L, et al. Infections due to *Escherichia coli* producing  
9 extended-spectrum beta-lactamase among hospitalised patients: factors influencing  
10 mortality. *J Hosp Infect* 2008;68:116–22.  
11  
12
- 13 35. Tumbarello M, Spanu T, Di Bidino R, et al. Costs of bloodstream infections caused by  
14 *Escherichia coli* and influence of extended-spectrum-beta-lactamase production and  
15 inadequate initial antibiotic therapy. *Antimicrob Agents Chemother* 2010;54:4085–91.  
16  
17
- 18 36. Kang CI, Chung DR, Ko KS, et al. Risk factors for infection and treatment outcome of  
19 extended-spectrum beta-lactamase-producing *Escherichia coli* and *Klebsiella pneumoniae*  
20 bacteremia in patients with hematologic malignancy. *Ann Hematol* 2012;91:115–21.  
21  
22
- 23 37. Wu YH, Chen PL, Hung YP, et al. Risk factors and clinical impact of levofloxacin or  
24 cefazolin nonsusceptibility or ESBL production among uropathogens in adults with  
25 community-onset urinary tract infections. *J Microbiol Immunol Infect* 2014;47:197–203.  
26  
27
- 28 38. Rodriguez-Bano J, Picon E, Gijon P, et al. Community-onset bacteremia due to extended-  
29 spectrum beta-lactamase-producing *Escherichia coli*: risk factors and prognosis. *Clin*  
30 *Infect Dis* 2010;50:40–8.  
31  
32
- 33 39. Gurntke S, Kohler C, Steinmetz I, et al. Molecular epidemiology of extended-spectrum  
34 beta-lactamase (ESBL)-positive *Klebsiella pneumoniae* from bloodstream infections and  
35 risk factors for mortality. *J Infect Chemother* 2014;20:817–9.  
36  
37
- 38 40. Oh MM, Chae JY, Kim JW, et al. Positive culture for extended-spectrum beta-lactamase  
39 during acute prostatitis after prostate biopsy is a risk factor for progression to chronic  
40 prostatitis. *Urology* 2013;81:1209–12.  
41  
42
- 43 41. Leistner R, Gurntke S, Sakellariou C, et al. Bloodstream infection due to extended-  
44 spectrum beta-lactamase (ESBL)-positive *K. pneumoniae* and *E. coli*: an analysis of the  
45 disease burden in a large cohort. *Infection* 2014;42:991–7.  
46  
47
- 48 42. Ku NS, Chung HS, Choi JY, et al. Clinical usefulness of the 2010 clinical and laboratory  
49 standards institute revised breakpoints for cephalosporin use in the treatment of  
50 bacteremia caused by *Escherichia coli* or *Klebsiella* spp. *Biomed Res Int*  
51 2015;2015:831074.  
52  
53
- 54 43. Anunnatsiri S, Towiwat P, Chaimanee P. Risk factors and clinical outcomes of extended  
55 spectrum beta-lactamase (ESBL)-producing *Escherichia coli* septicemia at Srinagarind  
56  
57  
58  
59  
60

- 1  
2  
3 University Hospital, Thailand. *Southeast Asian J Trop Med Public Health* 2012;43:1169–  
4 77.  
5  
6  
7 44. Kang CI, Kim SH, Kim DM, et al. Risk factors for and clinical outcomes of bloodstream  
8 infections caused by extended-spectrum beta-lactamase-producing *Klebsiella*  
9 *pneumoniae*. *Infect Control Hosp Epidemiol* 2004;25:860–7.  
10  
11 45. Raviv Y, Shitrit D, Amital A, et al. Multidrug-resistant *Klebsiella pneumoniae* acquisition  
12 in lung transplant recipients. *Clin Transplant* 2012;26:E388–94.  
13  
14 46. MacVane SH, Tuttle LO, Nicolau DP. Impact of extended-spectrum beta-lactamase-  
15 producing organisms on clinical and economic outcomes in patients with urinary tract  
16 infection. *J Hosp Med* 2014;9:232–8.  
17  
18 47. Abhilash KP, Veeraraghavan B, Abraham OC. Epidemiology and outcome of bacteremia  
19 caused by extended spectrum beta-lactamase (ESBL)-producing *Escherichia coli* and  
20 *Klebsiella spp.* in a tertiary care teaching hospital in south India. *J Assoc Physicians India*  
21 2010;58 Suppl:13-7.  
22  
23 48. Shanthi M, Sekar U. Extended spectrum beta lactamase producing *Escherichia coli* and  
24 *Klebsiella pneumoniae*: risk factors for infection and impact of resistance on outcomes. *J*  
25 *Assoc Physicians India* 2010;58 Suppl:41–4.  
26  
27 49. Han SB, Jung SW, Bae EY, et al. Extended-spectrum beta-lactamase-producing  
28 *Escherichia coli* and *Klebsiella pneumoniae* bacteremia in febrile neutropenic children.  
29 *Microb Drug Resist* 2015;21:244–51.  
30  
31 50. Lee S, Song DY, Cho SH, et al. Impact of extended-spectrum beta-lactamase on acute  
32 pyelonephritis treated with empirical ceftriaxone. *Microb Drug Resist* 2014;20:39–44.  
33  
34 51. Chayakulkeeree M, Junsriwong P, Keerasuntonpong A, et al. Epidemiology of extended-  
35 spectrum beta-lactamase producing gram-negative bacilli at Siriraj Hospital, Thailand,  
36 2003. *Southeast Asian J Trop Med Public Health* 2005;36:1503–9.  
37  
38 52. Apisarnthanarak A, Kiratisin P, Mundy LM. Predictors of mortality from community-  
39 onset bloodstream infections due to extended-spectrum beta-lactamase-producing  
40 *Escherichia coli* and *Klebsiella pneumoniae*. *Infect Control Hosp Epidemiol* 2008;29:671–  
41 4.  
42  
43 53. Apisarnthanarak A, Kiratisin P, Saifon P, et al. Predictors of mortality among patients  
44 with community-onset infection due to extended-spectrum beta-lactamase-producing  
45 *Escherichia coli* in Thailand. *Infect Control Hosp Epidemiol* 2008;29:80–2.  
46  
47  
48  
49  
50  
51  
52  
53  
54  
55  
56  
57  
58  
59  
60

- 1  
2  
3 54. Jean SS, Ko WC, Xie Y, et al. Clinical characteristics of patients with community-  
4 acquired complicated intra-abdominal infections: a prospective, multicentre, observational  
5 study. *Int J Antimicrob Agents* 2014;44:222–8.  
6  
7
- 8 55. Lee J, Pai H, Kim YK, et al. Control of extended-spectrum beta-lactamase-producing  
9 Escherichia coli and Klebsiella pneumoniae in a children's hospital by changing  
10 antimicrobial agent usage policy. *J Antimicrob Chemother* 2007;60:629–37.  
11  
12
- 13 56. Briongos-Figuero LS, Gomez-Traveso T, Bachiller-Luque P, et al. Epidemiology, risk  
14 factors and comorbidity for urinary tract infections caused by extended-spectrum beta-  
15 lactamase (ESBL)-producing enterobacteria. *Int J Clin Pract* 2012;66:891–6.  
16  
17
- 18 57. Ha YE, Kang CI, Cha MK, et al. Epidemiology and clinical outcomes of bloodstream  
19 infections caused by extended-spectrum beta-lactamase-producing Escherichia coli in  
20 patients with cancer. *Int J Antimicrob Agents* 2013;42:403–9.  
21  
22
- 23 58. Du B, Long Y, Liu H, et al. Extended-spectrum beta-lactamase-producing Escherichia  
24 coli and Klebsiella pneumoniae bloodstream infection: risk factors and clinical outcome.  
25 *Intensive Care Med* 2002;28:1718–23.  
26  
27
- 28 59. Stone PW, Gupta A, Loughrey M, et al. Attributable costs and length of stay of an  
29 extended-spectrum beta-lactamase-producing Klebsiella pneumoniae outbreak in a  
30 neonatal intensive care unit. *Infect Control Hosp Epidemiol* 2003;24:601–6.  
31  
32
- 33 60. Pena C, Pujol M, Ardanuy C, et al. An outbreak of hospital-acquired Klebsiella  
34 pneumoniae bacteraemia, including strains producing extended-spectrum beta-lactamase.  
35 *J Hosp Infect* 2001;47:53–9.  
36  
37
- 38 61. Kola A, Maciejewski O, Sohr D, et al. Clinical impact of infections caused by ESBL-  
39 producing E. coli and K. pneumoniae. *Scand J Infect Dis* 2007;39:975–82.  
40  
41
- 42 62. Tsai MH, Lee IT, Chu SM, et al. Clinical and Molecular Characteristics of Neonatal  
43 Extended-Spectrum beta-Lactamase-Producing Gram-Negative Bacteremia: A 12-Year  
44 Case-Control-Control Study of a Referral Center in Taiwan. *PLoS One*  
45 2016;11(8):e0159744.  
46  
47
- 48 63. Maslikowska JA, Walker SA, Elligsen M, et al. Impact of infection with extended-  
49 spectrum beta-lactamase-producing Escherichia coli or Klebsiella species on outcome and  
50 hospitalization costs. *J Hosp Infect* 2016;92:33–41.  
51  
52
- 53 64. Onken A, Said AK, Jorstad M, et al. Prevalence and antimicrobial resistance of microbes  
54 causing bloodstream infections in Unguja, Zanzibar. *PLoS One* 2015;10:e0145632.  
55  
56
- 57 65. Nguyen ML, Toye B, Kanji S, et al. Risk factors for and outcomes of bacteremia caused  
58 by extended-spectrum  $\beta$ -lactamase-producing Escherichia coli and Klebsiella species at a  
59  
60

- 1  
2  
3 Canadian tertiary care hospital. *Can J Hosp Pharm* 2015;68(2):136–43. [published Online  
4 First: 2015/05/13]  
5  
6  
7 66. Denis B, Lafaurie M, Donay JL, et al. Prevalence, risk factors, and impact on clinical  
8 outcome of extended-spectrum beta-lactamase-producing *Escherichia coli* bacteraemia: a  
9 five-year study. *Int J Infect Dis* 2015;39:1–6.  
10  
11 67. Chopra T, Marchaim D, Johnson PC, et al. Risk factors for bloodstream infection caused  
12 by extended-spectrum beta-lactamase-producing *Escherichia coli* and *Klebsiella*  
13 *pneumoniae*: A focus on antimicrobials including cefepime. *Am J Infect Control*  
14 2015;43:719–23.  
15  
16 68. Artero A, Esparcia A, Alberola J, et al. Prospective cohort study of risk factors for  
17 extended-spectrum ss-lactamase-producing *Escherichia coli* urinary tract infections in  
18 elderly patients admitted to hospital. *Int J Clin Pract* 2017;71:doi:10.1111/ijcp.13001  
19  
20 69. Chen IL, Huang HC, Wu CT, et al. Analysis of early-onset bloodstream infection due to  
21 *Escherichia coli* infection in premature babies. *Medicine* 2017;96:e7748.  
22  
23 70. Islas-Munoz B, Volkow-Fernandez P, Ibanes-Gutierrez C, et al. Bloodstream infections in  
24 cancer patients. Risk factors associated with mortality. *Int J Infect Dis* 2018;71:59–64.  
25  
26 71. Ma J, Li N, Liu Y, et al. Antimicrobial resistance patterns, clinical features, and risk  
27 factors for septic shock and death of nosocomial *E coli* bacteremia in adult patients with  
28 hematological disease: A monocenter retrospective study in China. *Medicine*  
29 2017;96:e6959.  
30  
31 72. Man MY, Shum HP, Chan YH, et al. Clinical predictors and outcomes of *Klebsiella*  
32 *pneumoniae* bacteraemia in a regional hospital in Hong Kong. *J Hosp Infect* 2017;97:35–  
33 41.  
34  
35 73. Marando R, Seni J, Mirambo MM, et al. Predictors of the extended-spectrum-beta  
36 lactamases producing Enterobacteriaceae neonatal sepsis at a tertiary hospital, Tanzania.  
37 *Int J Med Microbiol* 2018;308:803–11.  
38  
39 74. Namikawa H, Yamada K, Fujimoto H, et al. Clinical characteristics of bacteremia caused  
40 by extended-spectrum beta-lactamase-producing *Escherichia coli* at a tertiary hospital.  
41 *Intern Med* 2017;56:1807–15.  
42  
43 75. Shi SH, Feng XN, Lai MC, et al. Biliary diseases as main causes of pyogenic liver abscess  
44 caused by extended-spectrum beta-lactamase-producing Enterobacteriaceae. *Liver Int*  
45 2017;37:727–34.  
46  
47  
48  
49  
50  
51  
52  
53  
54  
55  
56  
57  
58  
59  
60

- 1  
2  
3 76. Tanir Basaranoglu S, Ozsurekci Y, Aykac K, et al. A comparison of blood stream  
4 infections with extended spectrum beta-lactamase-producing and non-producing  
5 *Klebsiella pneumoniae* in pediatric patients. *Ital J Pediat* 2017;43:79.  
6  
7  
8 77. Razazi K, Mekontso Dessap A, Carteaux G, et al. Frequency, associated factors and  
9 outcome of multi-drug-resistant intensive care unit-acquired pneumonia among patients  
10 colonized with extended-spectrum beta-lactamase-producing Enterobacteriaceae. *Ann*  
11 *Intensive Care* 2017;7:61.  
12  
13 78. Ray S, Anand D, Purwar S, et al. Association of high mortality with extended-spectrum  
14 beta-lactamase (ESBL) positive cultures in community acquired infections. *J Crit Care*  
15 2018;44:255–60.  
16  
17 79. Haruki Y, Hagiya H, Haruki M, et al. Clinical characteristics and outcome of critically ill  
18 patients with bacteremia caused by extended-spectrum beta-lactamase-producing and non-  
19 producing *Escherichia coli*. *J Infect Chemother* 2018;24:944–7.  
20  
21 80. Lin WT, Tang HJ, Lai CC, et al. Clinical manifestations and bacteriological features of  
22 culture-proven Gram-negative bacterial arthritis. *J Microbiol Immunol Infect*  
23 2017;50:527–31.  
24  
25 81. Buys H, Muloiwa R, Bamford C, et al. *Klebsiella pneumoniae* bloodstream infections at a  
26 South African children's hospital 2006-2011, a cross-sectional study. *BMC Infect Dis*  
27 2016;16:570.  
28  
29 82. Lee CC, Lee CH, Hong MY, et al. Propensity-matched analysis of the impact of extended-  
30 spectrum beta-lactamase production on adults with community-onset *Escherichia coli*,  
31 *Klebsiella* species, and *Proteus mirabilis* bacteremia. *J Microbiol Immunol Infect*  
32 2018;51:519–26.  
33  
34 83. Huang YY, Alleyne A, Leung V, et al. Urosepsis due to extended-spectrum beta-  
35 lactamase-producing *Escherichia coli*: a retrospective, single-centre review of risk factors  
36 and clinical outcomes. *Can J Hosp Pharm* 2018;71:119-27.  
37  
38 84. Komatsu Y, Kasahara K, Inoue T, et al. Molecular epidemiology and clinical features of  
39 extended-spectrum beta-lactamase- or carbapenemase-producing *Escherichia coli*  
40 bacteremia in Japan. *PLoS One* 2018;13:e0202276.  
41  
42 85. Liu M, Li M, Wu L, et al. Extended-spectrum beta-lactamase-producing *E. coli*  
43 septicemia among rectal carriers in the ICU. *Medicine* 2018;97:e12445.  
44  
45 86. Nivesvivat T, Piyaraj P, Thunyaharn S, et al. Clinical epidemiology, risk factors and  
46 treatment outcomes of extended-spectrum beta-lactamase producing Enterobacteriaceae  
47  
48  
49  
50  
51  
52  
53  
54  
55  
56  
57  
58  
59  
60

- 1  
2  
3 bacteremia among children in a tertiary care hospital, Bangkok, Thailand. *BMC Res Notes*  
4 2018;11:624.  
5  
6  
7 87. Cordery RJ, Roberts CH, Cooper SJ, et al. Evaluation of risk factors for the acquisition of  
8 bloodstream infections with extended-spectrum beta-lactamase-producing *Escherichia coli*  
9 and *Klebsiella* species in the intensive care unit; antibiotic management and clinical  
10 outcome. *J Hosp Infect* 2008;68:108–15.  
11  
12  
13 88. Daikos GL, Kosmidis C, Tassios PT, et al. Enterobacteriaceae bloodstream infections:  
14 presence of integrons, risk factors, and outcome. *Antimicrob Agents Chemother*  
15 2007;51:2366–72. doi: 10.1128/AAC.00044-07 [published Online First: 2007/04/25]  
16  
17  
18 89. Gudiol C, Calatayud L, Garcia-Vidal C, et al. Bacteraemia due to extended-spectrum beta-  
19 lactamase-producing *Escherichia coli* (ESBL-EC) in cancer patients: clinical features, risk  
20 factors, molecular epidemiology and outcome. *J Antimicrob Chemother* 2010;65(2):333–  
21 41.  
22  
23  
24 90. Marchaim D, Gottesman T, Schwartz O, et al. National multicenter study of predictors  
25 and outcomes of bacteremia upon hospital admission caused by Enterobacteriaceae  
26 producing extended-spectrum beta-lactamases. *Antimicrob Agents Chemother*  
27 2010;54:5099–104.  
28  
29  
30 91. Menashe G, Borer A, Yagupsky P, et al. Clinical significance and impact on mortality of  
31 extended-spectrum beta lactamase-producing Enterobacteriaceae isolates in nosocomial  
32 bacteremia. *Scand J Infect Dis* 2001;33:188–93.  
33  
34  
35 92. Ortega M, Marco F, Soriano A, et al. Analysis of 4758 *Escherichia coli* bacteraemia  
36 episodes: predictive factors for isolation of an antibiotic-resistant strain and their impact  
37 on the outcome. *J Antimicrob Chemother* 2009;63:568–74.  
38  
39  
40 93. Szilagyi E, Fuzi M, Borocz K, et al. Risk factors and outcomes for bloodstream infections  
41 with extended-spectrum beta-lactamase-producing *Klebsiella pneumoniae* ; Findings of  
42 the nosocomial surveillance system in Hungary. *Acta Microbiol Immunol Hung*  
43 2009;56:251–62. doi:  
44  
45  
46 94. Tsai SS, Huang JC, Chen ST, et al. Characteristics of *Klebsiella pneumoniae* bacteremia  
47 in community-acquired and nosocomial infections in diabetic patients. *Chang Gung Med J*  
48 2010;33:532–9.  
49  
50  
51 95. Carrara E, Pfeffer I, Zusman O, et al. Determinants of inappropriate empirical antibiotic  
52 treatment: systematic review and meta-analysis. *Int J Antimicrob Agents* 2018;51:548–53,  
53  
54  
55 96. Gandra S, Barter DM, Laxminarayan R. Economic burden of antibiotic resistance: how  
56 much do we really know? *Clin Microbiol Infect* 2014;20:973–80.  
57  
58  
59  
60

**FIGURE LEGENDS**

Figure 1: Literature search and study inclusion and exclusion

Figure 2: Pooled risk ratios for all-cause mortality in patients with ESBL bloodstream infections compared to patients with non-ESBL bloodstream infections— subgroups not included in attributable mortality

Figure 3: Pooled risk ratios for attributable mortality in patients with ESBL bloodstream infections compared to patients with non-ESBL bloodstream infections

Figure 4: Weighted mean difference in the length of stay for patients with ESBL bloodstream infections compared to patients with non-ESBL bloodstream infections

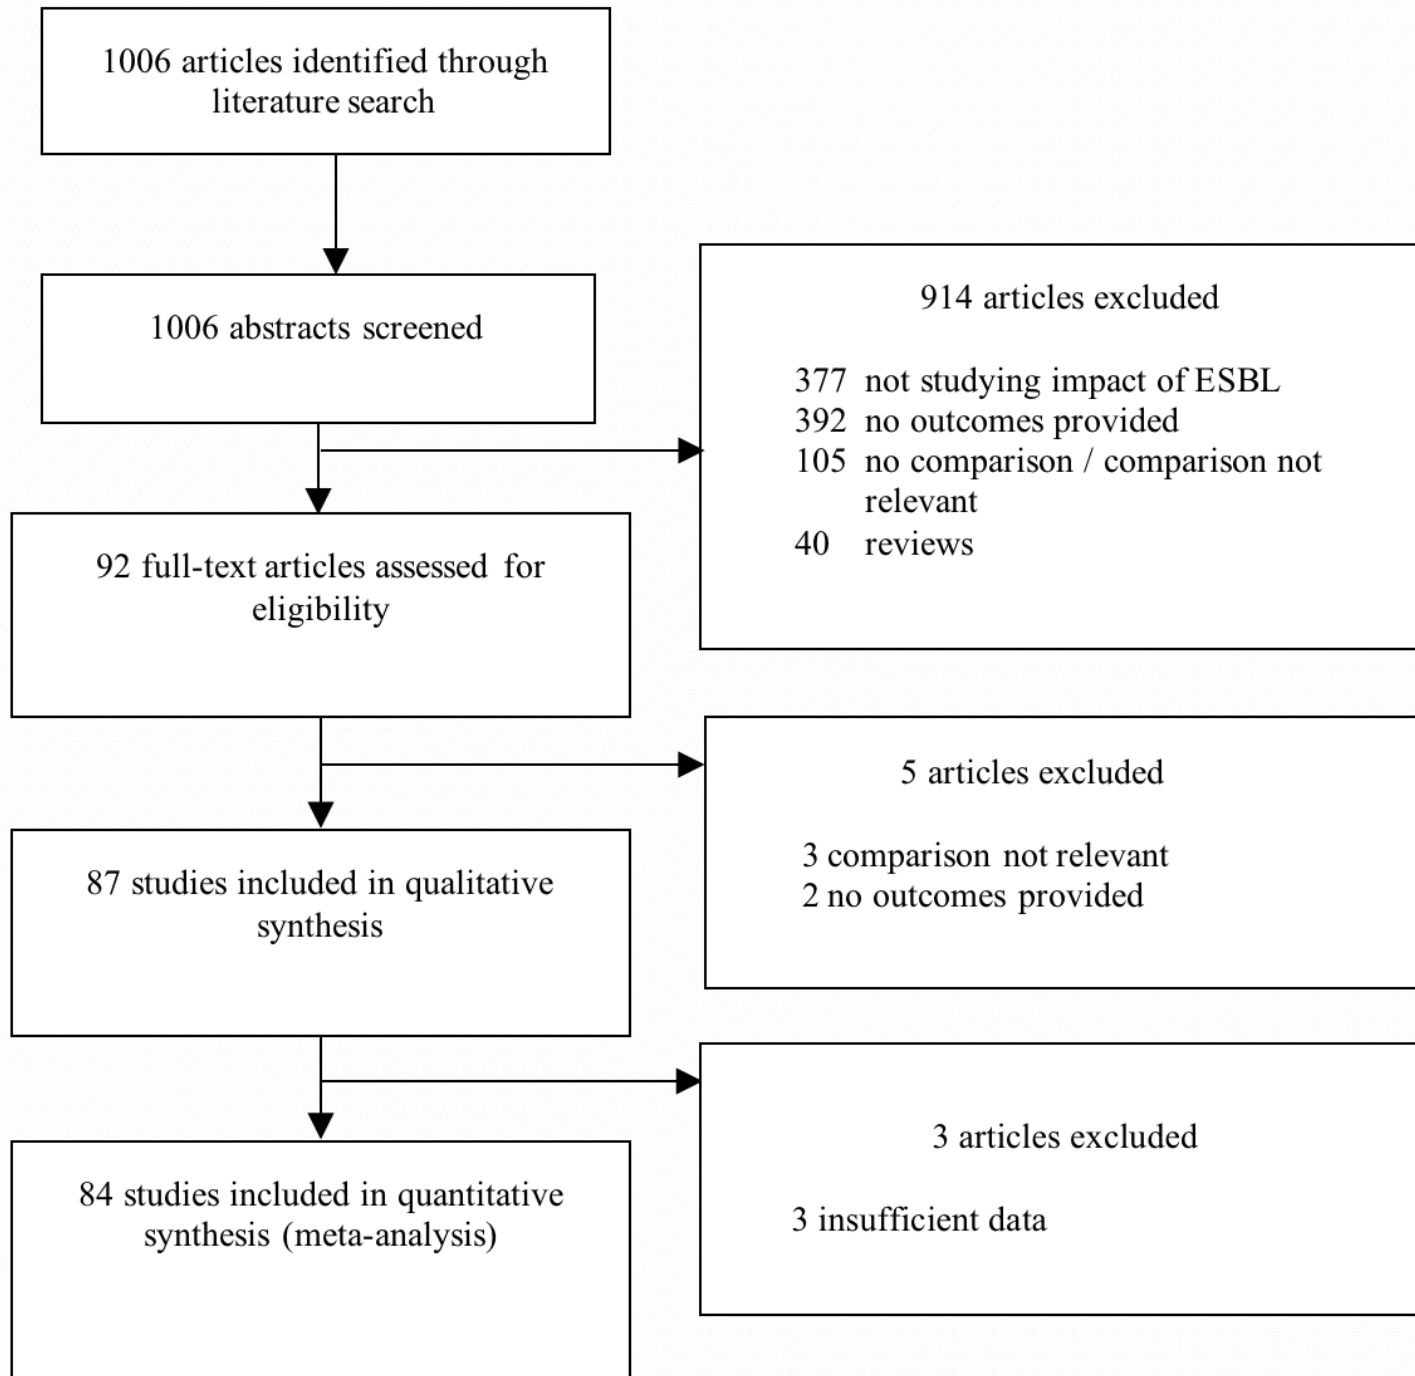



1  
2  
3  
4  
5  
6  
7  
8  
9  
10  
11  
12  
13  
14  
15  
16  
17  
18  
19  
20  
21  
22  
23  
24  
25  
26  
27  
28  
29  
30  
31  
32  
33  
34  
35  
36  
37  
38  
39  
40  
41  
42  
43  
44  
45  
46  
47  
48  
49  
50  
51  
52  
53  
54

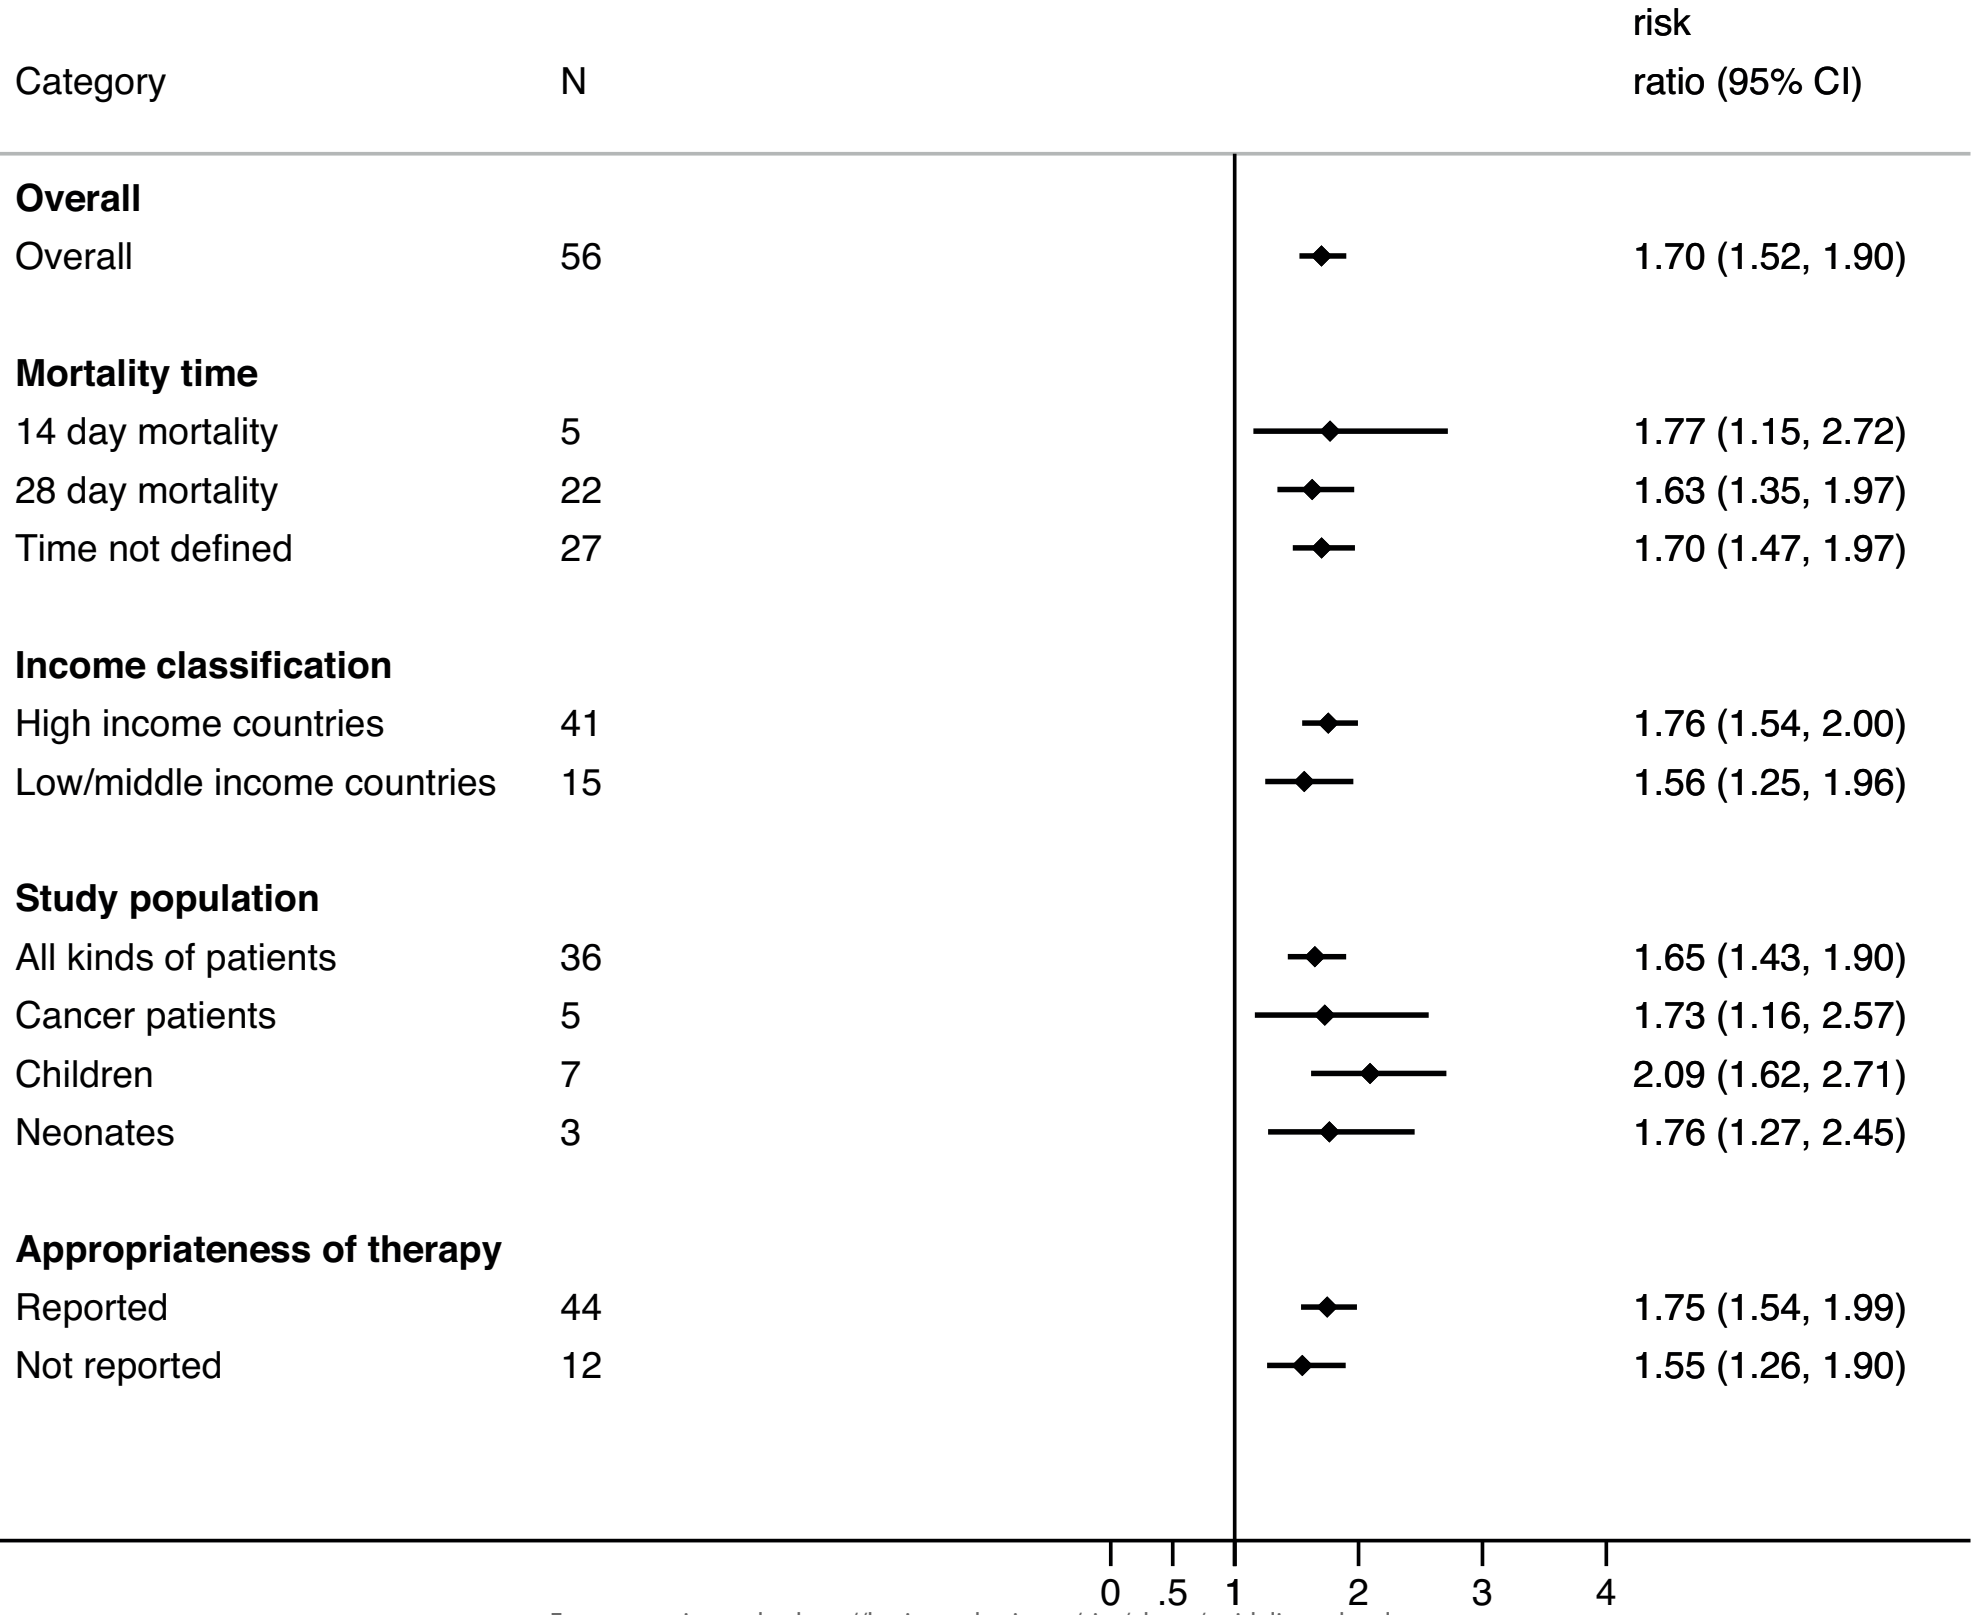

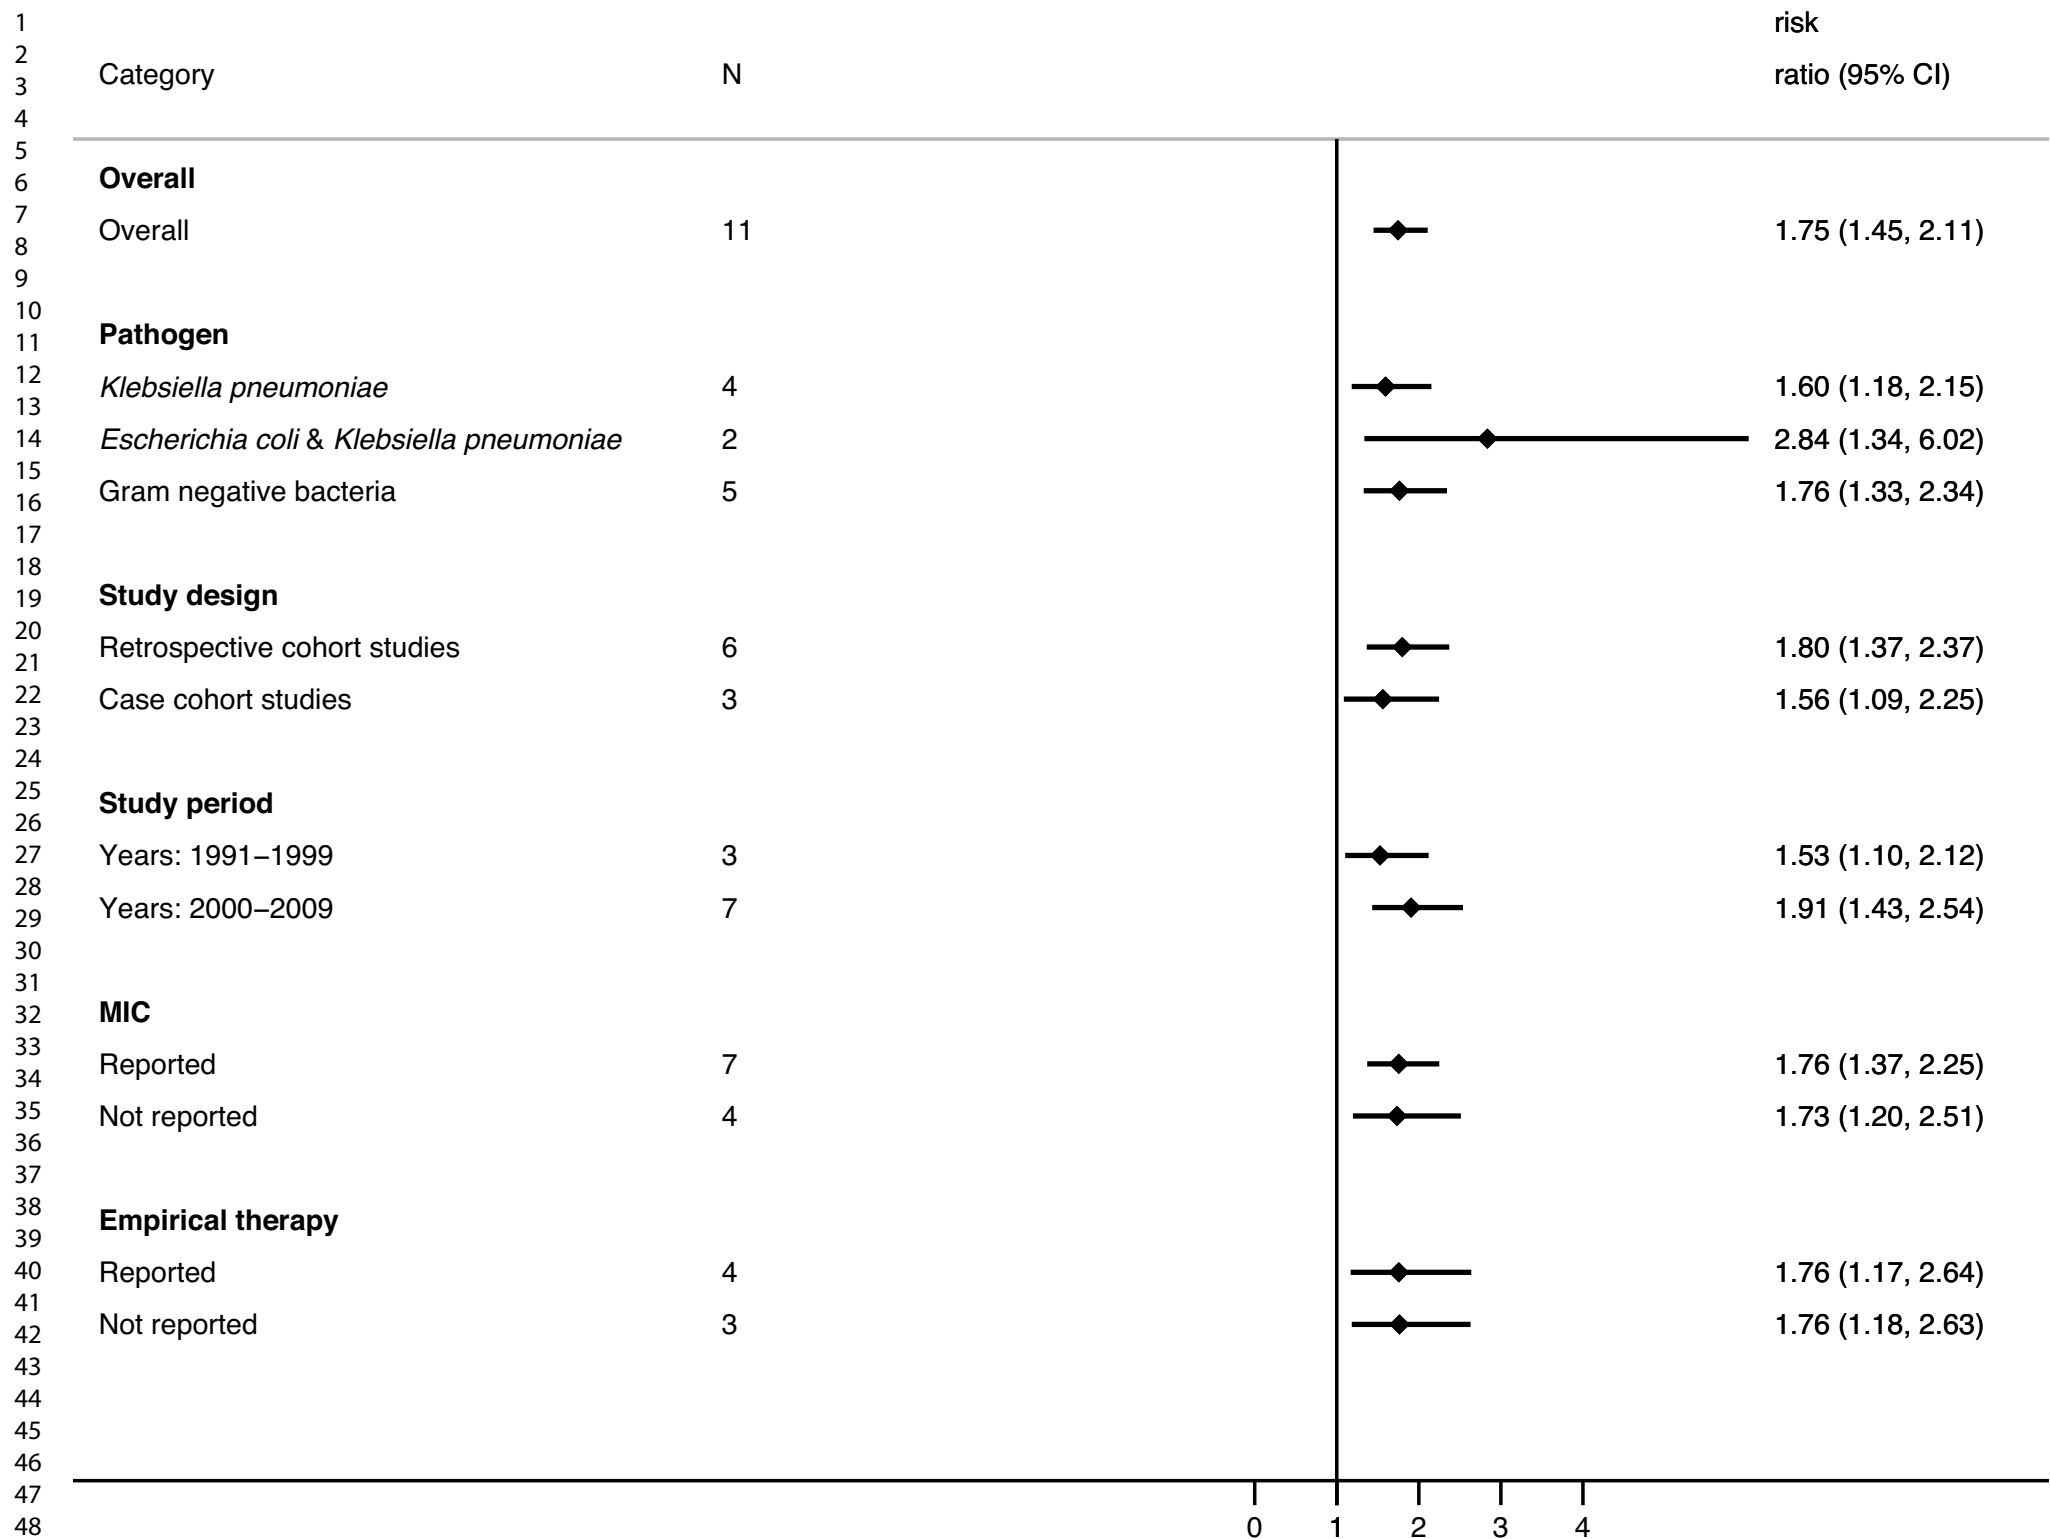

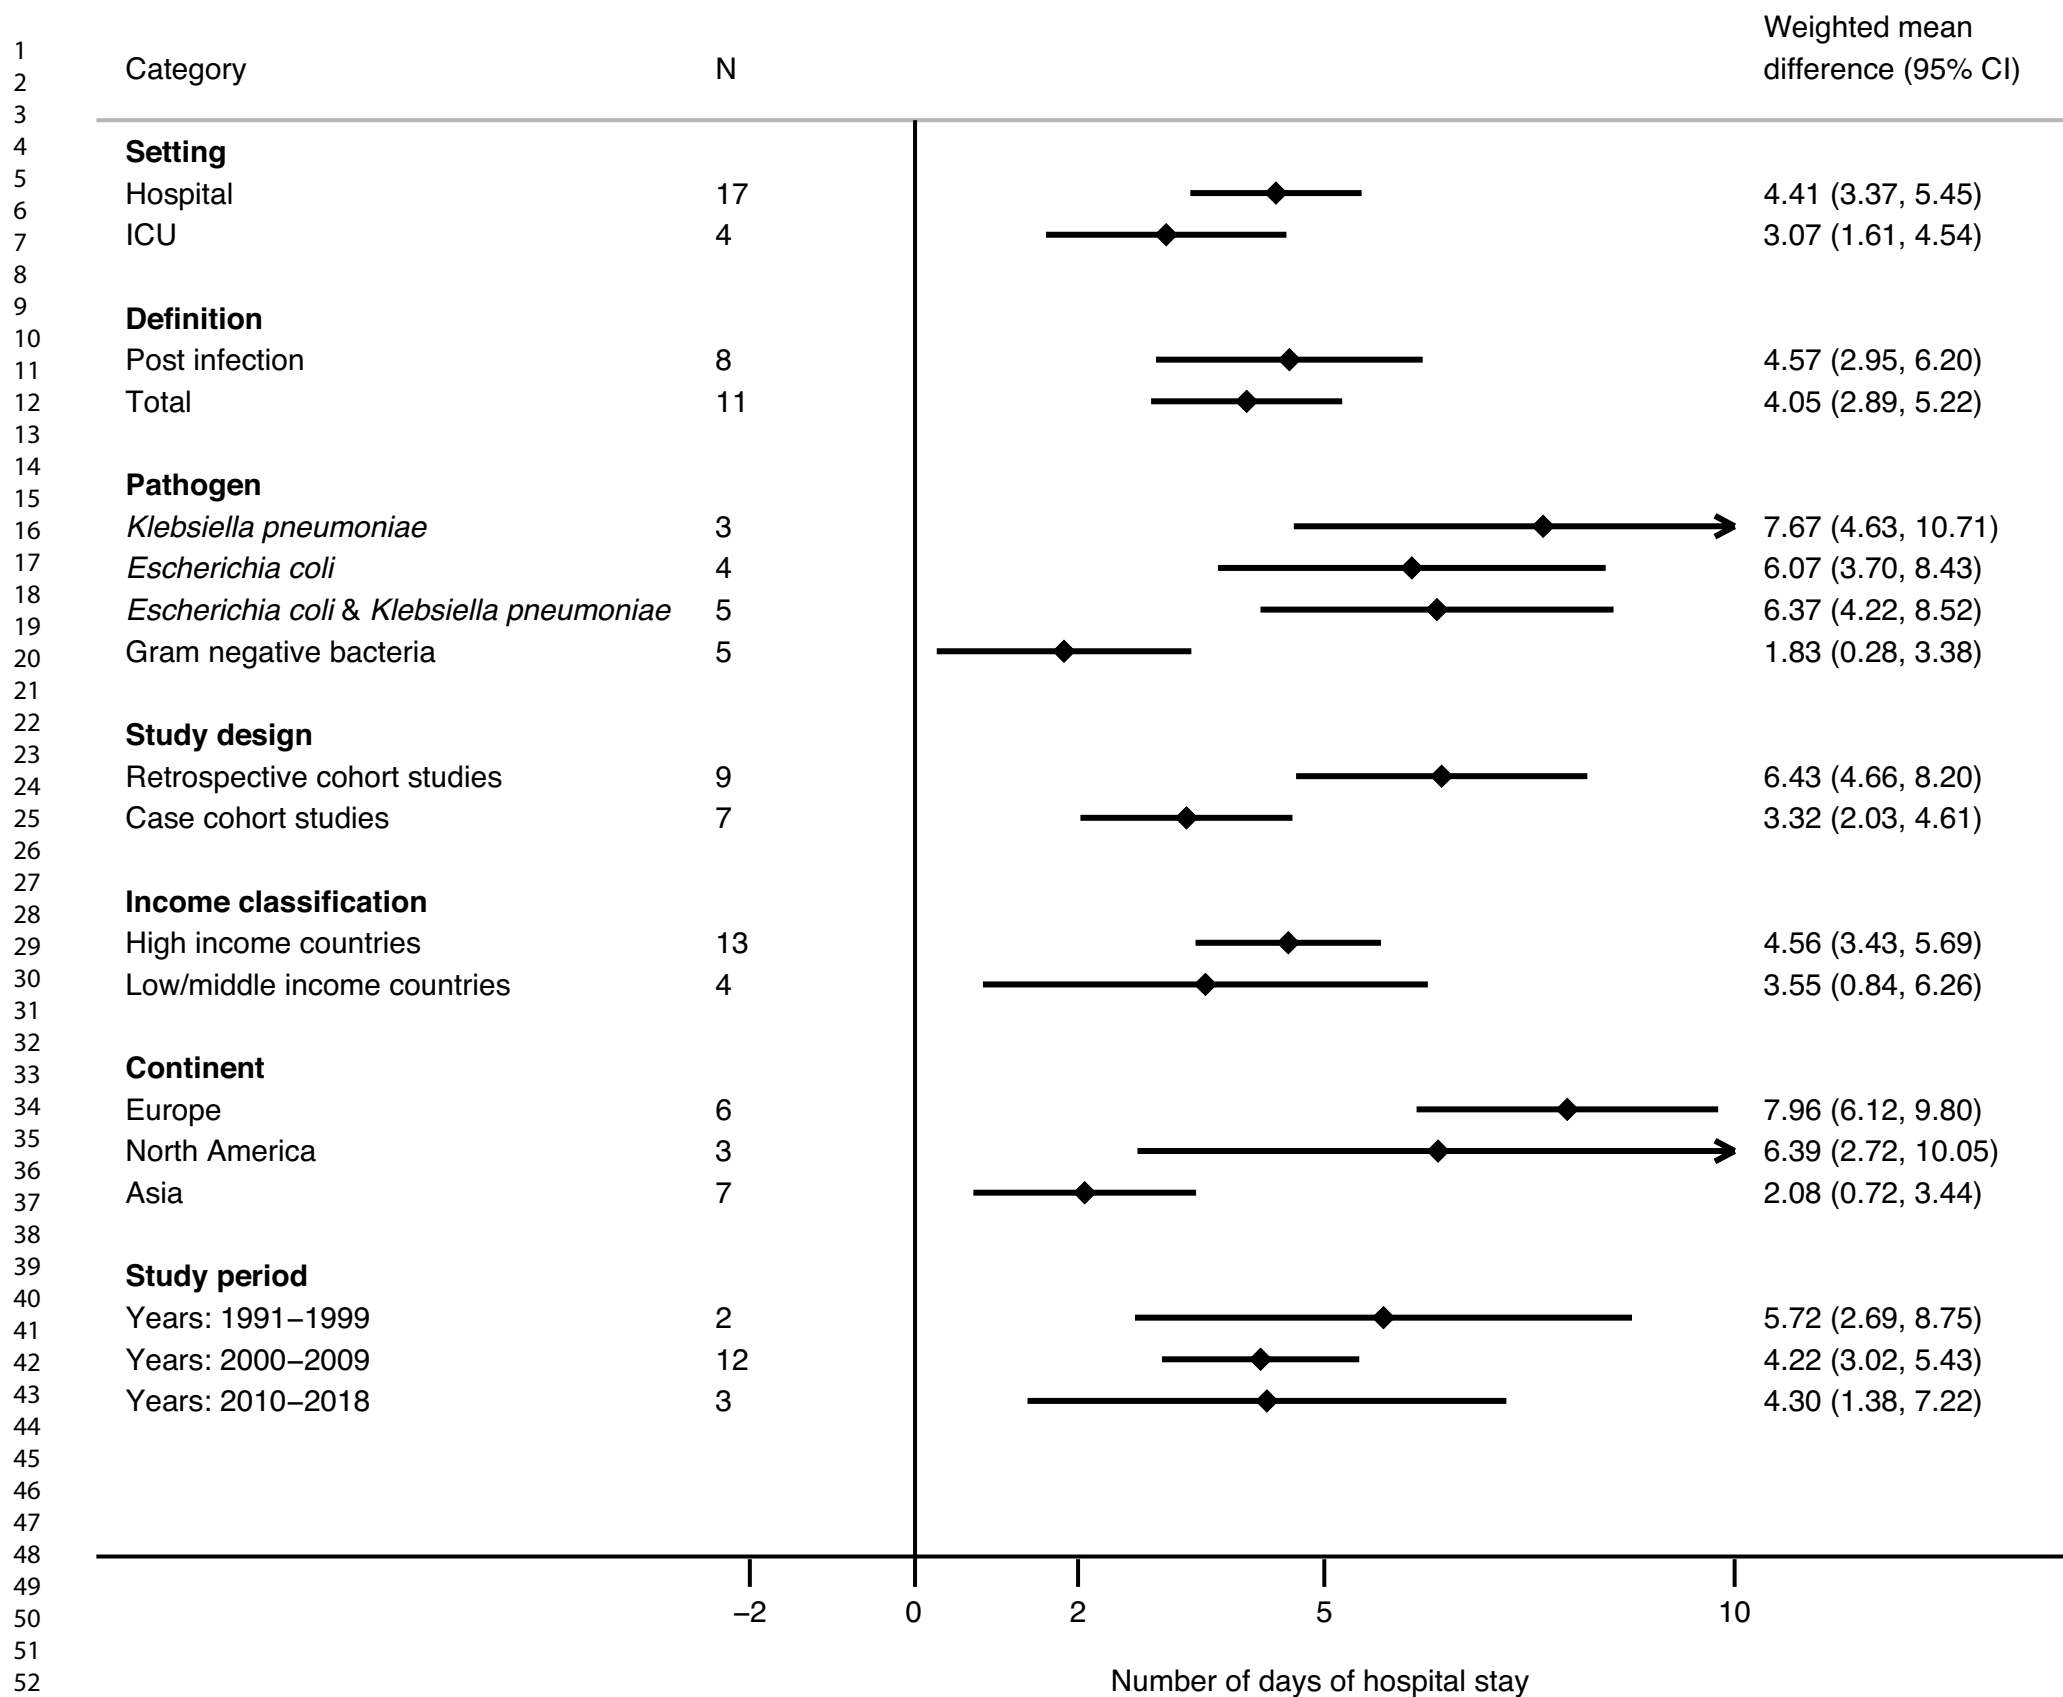

Supplementary table S1: Study characteristics overview

| Subgroup                                                                                                                    | All Studies | Bloodstream infections | Noninvasive infections |
|-----------------------------------------------------------------------------------------------------------------------------|-------------|------------------------|------------------------|
|                                                                                                                             | <b>87</b>   | <b>57</b>              | <b>10</b>              |
| <b>Country</b>                                                                                                              |             |                        |                        |
| South Korea <sup>11,12,14,15,29,33,36,40,42,44,49,50,55,57</sup>                                                            | 14          | 9                      | 2                      |
| Thailand <sup>22,24,43,51-53,86</sup>                                                                                       | 7           | 3                      |                        |
| USA <sup>8,16,26,30,46,59,67</sup>                                                                                          | 7           | 2                      | 1                      |
| Spain <sup>34,38,56,60,68,89,92</sup>                                                                                       | 7           | 4                      | 2                      |
| Taiwan <sup>10,37,62,69,80,82,94</sup>                                                                                      | 7           | 5                      | 2                      |
| China <sup>58,71,72,75,85</sup>                                                                                             | 5           | 4                      |                        |
| Israel <sup>21,45,90,91</sup>                                                                                               | 4           | 3                      |                        |
| Germany <sup>9,39,41,61</sup>                                                                                               | 4           | 3                      |                        |
| Italy <sup>23,31,35</sup>                                                                                                   | 3           | 3                      |                        |
| Japan <sup>74,79,84</sup>                                                                                                   | 3           | 3                      |                        |
| Tanzania <sup>17,64,73</sup>                                                                                                | 3           | 3                      |                        |
| India <sup>47,48,78</sup>                                                                                                   | 3           | 1                      | 1                      |
| Canada <sup>63,65,83</sup>                                                                                                  | 3           | 2                      |                        |
| UK <sup>20,28,87</sup>                                                                                                      | 3           | 3                      |                        |
| France <sup>66,77</sup>                                                                                                     | 2           | 1                      | 1                      |
| South Africa <sup>13,81</sup>                                                                                               | 2           | 1                      |                        |
| Brazil <sup>13,81</sup>                                                                                                     | 2           | 2                      |                        |
| Greece <sup>88</sup>                                                                                                        | 1           | 1                      |                        |
| Hungary <sup>93</sup>                                                                                                       | 1           | 1                      |                        |
| Lebanon <sup>25</sup>                                                                                                       | 1           | -                      |                        |
| Malaysia <sup>27</sup>                                                                                                      | 1           | -                      | 1                      |
| Mexico <sup>70</sup>                                                                                                        | 1           | 1                      |                        |
| Saudi Arabia <sup>18</sup>                                                                                                  | 1           | 1                      |                        |
| Turkey <sup>76</sup>                                                                                                        | 1           | 1                      |                        |
|                                                                                                                             |             |                        |                        |
| <b>Continent</b>                                                                                                            |             |                        |                        |
| Asia <sup>10-12,14,15,18,21,22,23,25,27,29,33,36,37,40,42-45,47-53,55,57,58,62,69,71,72,74,74,78-80,82,84-86,90,91,94</sup> | 46          | 29                     | 6                      |
| Europe <sup>9,20,23,28,31,34,35,38,39,41,56,60,61,66,68,76,77,87-89,92,93</sup>                                             | 22          | 17                     | 3                      |
| North America <sup>8,16,26,30,46,59,63,65,67,83</sup>                                                                       | 10          | 4                      | 1                      |
| Africa <sup>13,17,64,73,81</sup>                                                                                            | 5           | 4                      | -                      |
| South America <sup>19,32,70</sup>                                                                                           | 3           | 3                      | -                      |
| More than 1 continent <sup>54</sup>                                                                                         | 1           | -                      | -                      |

|                                                                                                                                |    |    |   |
|--------------------------------------------------------------------------------------------------------------------------------|----|----|---|
| <b>Income group</b>                                                                                                            |    |    |   |
| High-income countries <sup>8-12,14-16,18,20,21,23,26,28-31,34-42,44-46,49,50,55-57,59-63,65-69,74,77,79,80,82-84,87-94,</sup>  | 60 | 41 | 8 |
| Low- and middle-income countries <sup>13,17,19,22,24,25,27,32,43,48,51-53,58,64,70-73,75,76,78,81,85,86</sup>                  | 26 | 16 | 2 |
| High-income countries AND Low- and middle-income countries <sup>54</sup>                                                       | 1  | -  | - |
|                                                                                                                                |    |    |   |
| <b>Study design</b>                                                                                                            |    |    |   |
| Case cohort study <sup>8,10,22-26,29,38,42,44,53,56,59,61-63,65-67,83-85</sup>                                                 | 24 | 14 |   |
| Retrospective cohort study <sup>9,11-15,18,19,21,27,31-36,39-41,43,45,46,48-52,57,58,69,71,72,74-76,79-82,86,87,91,93,94</sup> | 44 | 32 |   |
| Prospective cohort study <sup>16,17,28,30,37,47,54,60,64,68,70,73,77,78,88-90,92</sup>                                         | 18 | 11 |   |
|                                                                                                                                |    |    |   |
| <b>Year group</b>                                                                                                              |    |    |   |
| 1991-1999 <sup>8,58,13,14,15,60,19,23,26,34,44,91,92</sup>                                                                     | 13 | 10 | - |
| 2000-2009 <sup>9-12,16-18,20-22,24,25,27-33,35-43,45,47-50,52,53,55,56,59,61,62,65-67,87-90,93,94</sup>                        | 49 | 31 | 6 |
| 2010-2018 <sup>46,51,52,57,63,64,68-86</sup>                                                                                   | 25 | 16 | 4 |
|                                                                                                                                |    |    |   |
| <b>Pathogen</b>                                                                                                                |    |    |   |
| <i>Escherichia coli</i> <sup>9,22,28,31,33-35,38,41,43,50,53,56,57,66,68,69,71,74,84,85,89,92</sup>                            | 23 | 16 | 3 |
| <i>Klebsiella pneumoniae</i> <sup>13,14,18,19,23,27,30,32,39,41,45,59,60,72,76,81,93,94</sup>                                  | 17 | 11 | 1 |
| <i>E. coli</i> and <i>K. pneumoniae</i> <sup>8,11,12,15,24,26,36,41,42,44,46,48,49,52,55,58,61,67,83,86,87</sup>               | 20 | 13 | 2 |
| Gram-negative bacteria <sup>10,16,17,20,21,25,29,37,40,47,51,54,62-65,70,73,75,77-80,82,88,90,91</sup>                         | 27 | 17 | 4 |
|                                                                                                                                |    |    |   |
| <b>Study setting</b>                                                                                                           |    |    |   |
| Entire hospital <sup>8,9,14,16,18-25,27,28,31-36,38-44,46-48,50-53,56-58,60,63-67,71,72,74,80,83,84,88-94</sup>                | 57 | 40 | 7 |
| Intensive care unit <sup>30,59,62,73,77-79,86,87</sup>                                                                         | 9  | 5  | 1 |
| Pediatric ward <sup>15,17,26,49,55,76,81,86</sup>                                                                              | 8  | 7  | - |
| Neonatal ward <sup>13,59,62,69,73</sup>                                                                                        | 5  | 3  | - |
| Neonatal intensive care unit <sup>59,62,73</sup>                                                                               | 3  | 2  | - |
| Medical ward <sup>11,37,68</sup>                                                                                               | 3  | -  | 2 |
| Not provided <sup>29,45</sup>                                                                                                  | 2  | -  | - |
| Emergency Department <sup>10,82</sup>                                                                                          | 2  | 2  | - |
| Surgical ward <sup>30,54</sup>                                                                                                 | 2  | -  | - |
| Burn unit <sup>30</sup>                                                                                                        | 1  | -  | - |
| Oncology <sup>70</sup>                                                                                                         | 1  | 1  | - |
| Referral centre for hepatopacreaticobiliary diseases <sup>75</sup>                                                             | 1  | -  | - |
| Hematological <sup>12</sup>                                                                                                    | 1  | 1  | - |
|                                                                                                                                |    |    |   |

|                                                                                                                                                               |    |    |   |
|---------------------------------------------------------------------------------------------------------------------------------------------------------------|----|----|---|
| <b>Study population</b>                                                                                                                                       |    |    |   |
| All kinds of patients <sup>8-11,12,16,18-25,27,28,32,33,37-39,41-44,46-48,50-54,56,58,60,61,63-67,74,80,82-84,88,90-93</sup>                                  | 55 | 36 | 7 |
| Intensive care unit patients <sup>30,77-79,85,87</sup>                                                                                                        | 6  | 3  | 1 |
| Children <sup>15,17,26,49,55,76,81,86</sup>                                                                                                                   | 8  | 7  | - |
| Neonates <sup>13,59,62,69,73</sup>                                                                                                                            | 5  | 3  | - |
| Cancer patients <sup>31,49,57,70,89</sup>                                                                                                                     | 5  | 5  | - |
| Immunocompromised patients <sup>49</sup>                                                                                                                      | 1  | 1  | - |
| Diabetic patients <sup>94</sup>                                                                                                                               | 1  | 1  | - |
| Elderly patients <sup>68</sup>                                                                                                                                | 1  | -  | 1 |
| Patients with chemotherapy/stem cell transplantation <sup>12,89</sup>                                                                                         | 2  | 2  | - |
| Patients after prostatitis biopsy <sup>40</sup>                                                                                                               | 1  | -  | 1 |
| Lungs transplantation patients <sup>45</sup>                                                                                                                  | 1  | -  | - |
| Hematological patients <sup>71</sup>                                                                                                                          | 1  | 1  | - |
| All except cardiothoracic therapy, transplant surgery, burns <sup>72</sup>                                                                                    | 1  | 1  |   |
| Patients with pyogenic liver abscess <sup>75</sup>                                                                                                            | 1  | -  | - |
|                                                                                                                                                               |    |    |   |
| <b>Data reported</b>                                                                                                                                          |    |    |   |
| Treatment information <sup>8,10-11,21-24,28-36,38,42-47,49,50,52-63,65,66,68-94</sup>                                                                         | 74 | 50 | 6 |
| Appropriateness of treatment <sup>8,10-12,14,15,17-19,21-24,28-36,38,42-44,46,47,49,50,52-54,56-58,60-63,65,66,68,70-72,74,75,77,79,81-84,87-94</sup>         | 62 | 45 | 5 |
| Empirical therapy <sup>12,14,15,22,23,31,33-36,38,42,49,50,54,56,57,61,74,79,81,92</sup>                                                                      | 22 | 16 | 2 |
| Treatment outcome <sup>8,10-19,23,24,28-36,38,42-47,49,50,52-55,57-63,65,66,70-72,74,76-79,81-84,86-90,92-94</sup>                                            | 64 | 45 | 3 |
| Minimum inhibitory concentration results <sup>8,9,11,12,14-17,20-23,25,26,30,31,33-39,41,42,45,48-50,52-57,60,61,64,66,67,74-76,78,79,81,83-85,87,92,93</sup> | 52 | 34 | 4 |
| AmpC genotyping <sup>8,9,15,30,39,44,48,54,55,63,64,68,84</sup>                                                                                               | 13 | 6  | 2 |

1  
2  
3  
4  
5  
6  
7  
8  
9  
10  
11  
12  
13  
14  
15  
16  
17  
18  
19  
20  
21  
22  
23  
24  
25  
26  
27  
28  
29  
30  
31  
32  
33  
34  
35  
36  
37  
38  
39  
40  
41  
42  
43  
44  
45  
46

**Supplementary table S2: Characteristics for each study**

|                                  | Years     | Country                                               | Study design                | Control group      | Study population                                                                          | Setting                    | Outcome definition           | Main objective                                                                                                                                                                                                       | Pathogen |
|----------------------------------|-----------|-------------------------------------------------------|-----------------------------|--------------------|-------------------------------------------------------------------------------------------|----------------------------|------------------------------|----------------------------------------------------------------------------------------------------------------------------------------------------------------------------------------------------------------------|----------|
| Lautenbach E <sup>8</sup>        | 1997-1998 | USA                                                   | Case cohort study           | Non-ESBL-infection | All kinds of patients                                                                     | Entire hospital            | Attributable mortality; LOS  | Risk factors for infection with ESBL-producing pathogens, difference in clinical outcomes of infections: resistant vs. susceptible organisms                                                                         | EC, KP   |
| Kim SH <sup>12</sup>             | 2007-2008 | South Korea                                           | Cohort study, Retrospective | Non-ESBL-infection | Patients who received either chemotherapy or stem cell transplantation; neutropenic fever | Hematological ward, Others | All-cause mortality (28 day) | Risk factors for acquisition of ESBL, appropriateness of empirical antimicrobial therapy, clinical outcomes in relation to ESBL production                                                                           | EC, KP   |
| Chayakulkeere M <sup>51</sup>    | 2015-2015 | Thailand                                              | Cohort study, Retrospective | Non-ESBL-infection | All kinds of patients                                                                     | Entire hospital            | All-cause mortality          | Prevalence & risk factors for infections with & antibiotic susceptibility patterns of & outcomes of patients infected with ESBL-producing-GNB                                                                        | GNB      |
| Pisarntharak A <sup>52</sup>     | 2003-2007 | Thailand                                              | Cohort study, Retrospective | Non-ESBL-infection | All kinds of patients                                                                     | Entire hospital            | All-cause mortality, LOS     | Predictors for mortality associated with community-onset BSI with ESBL-producing pathogens, initial empirical antimicrobial regimens, associated hospital resource utilisation, costs accrued after diagnosis of BSI | EC, KP   |
| Pisarntharak A <sup>53</sup>     | 2003-2004 | Thailand                                              | Case cohort study           | Non-ESBL-infection | All kinds of patients                                                                     | Entire hospital            | All-cause mortality, LOS     | Mortality associated with community-onset infection due to ESBL-producing pathogens, associated hospital resource use, post-infection hospital cost                                                                  | EC       |
| Jean SS <sup>54</sup>            | 2010-2011 | Portugal, Columbia, the Philippines, Taiwan, Thailand | Cohort study, prospective   | Non-ESBL-infection | All kinds of patients                                                                     | Surgical ward              | Attributable mortality, LOS  | Clinical impact on hospitalised patients with community-acquired complicated intra-abdominal infection: ESBL-producing- vs. non-ESBL-producing pathogens                                                             | GNB      |
| Lee J <sup>55</sup>              | 1999-2005 | South Korea                                           | interventional studies      | Non-ESBL-infection | Children                                                                                  | Pediatric ward             | All-cause mortality (28 day) | impact of a change in antibiotic policy on ESBL-prevalence                                                                                                                                                           | EC, KP   |
| Briongos-Figuero A <sup>56</sup> | 2009-2010 | Spain                                                 | Case cohort study           | Non-ESBL-infection | All kinds of patients                                                                     | Entire hospital            | All-cause mortality          | Characteristics & associated risk factors for EBSL-enterobacteria-UTIs                                                                                                                                               | EC       |
| Ha YE <sup>57</sup>              | 2010-2012 | South Korea                                           | Cohort study, retrospective | Non-ESBL-infection | Patients with cancer                                                                      | Entire hospital            | All-cause mortality (28 day) | Clinical & molecular epidemiology of ESBL-EC bacteraemia, clinical impact of ESBLs on patient outcome                                                                                                                | EC       |
| Du B <sup>58</sup>               | 1997-1999 | China                                                 | Cohort study, retrospective | Non-ESBL-infection | All kinds of patients                                                                     | Entire hospital            | All-cause mortality          | Risk factors for nosocomial ESBL-EC- and ESBL-KP- bacteraemia & influence on patient outcome.                                                                                                                        | EC, KP   |

1  
2  
3  
4  
5  
6  
7  
8  
9  
10  
11  
12  
13  
14  
15  
16  
17  
18  
19  
20  
21  
22  
23  
24  
25  
26  
27  
28  
29  
30  
31  
32  
33  
34  
35  
36  
37  
38  
39  
40  
41  
42  
43  
44  
45  
46

|                              | Years     | Country      | Study design                | Control group                                                                      | Study population      | Setting         | Outcome definition                               | Main objective                                                                                                                                                                                                                                                                                                                                                                                                                                                                                                    | Pathogen |
|------------------------------|-----------|--------------|-----------------------------|------------------------------------------------------------------------------------|-----------------------|-----------------|--------------------------------------------------|-------------------------------------------------------------------------------------------------------------------------------------------------------------------------------------------------------------------------------------------------------------------------------------------------------------------------------------------------------------------------------------------------------------------------------------------------------------------------------------------------------------------|----------|
| Stone PW <sup>59</sup>       | 2001      | USA          | Case cohort study           | Non-ESBL-infection                                                                 | Neonates at NICU      | NICU            | LOS                                              | costs of interventions aimed at controlling the outbreak, attributable length of stay associated with infection and colonisation with ESBL-KP                                                                                                                                                                                                                                                                                                                                                                     | KP       |
| Pillay T <sup>13</sup>       | 1995-1996 | South Africa | Cohort study, retrospective | Non-ESBL-infection                                                                 | Neonates              | Neonatal ward   | All-cause mortality                              | Use of piperacillin/tazobactam in treatment of KP- infection                                                                                                                                                                                                                                                                                                                                                                                                                                                      | KP       |
| Kim BN <sup>14</sup>         | 1999-2000 | South Korea  | Cohort study, retrospective | Non-ESBL-infection                                                                 | All kinds of patients | Entire hospital | Attributable mortality, LOS                      | Prevalence & clinical characteristics of ESBL-KP- bacteraemia, impact of ESBL- production on outcome of patients with KP- bacteraemia in endemic situation.                                                                                                                                                                                                                                                                                                                                                       | KP       |
| Kim YK <sup>15</sup>         | 1993-1998 | South Korea  | Cohort study, retrospective | Non-ESBL-infection                                                                 | Children              | Pediatric ward  | All-cause mortality                              | Risk factors & clinical outcomes & clinical responses to treatment of ESBL-EC- and ESBL-KP-bacteraemia, prevalence and types of their ESBLs                                                                                                                                                                                                                                                                                                                                                                       | EC, KP   |
| Bhavnani SM <sup>16</sup>    | 2001-2002 | USA          | Cohort study, prospective   | Non-ESBL-infection                                                                 | All kinds of patients | Entire hospital | Attributable mortality, all-cause mortality      | Risk factors for occurrence of invasive ESBL-EC- and ESBL-KP-infections, factors associated with clinical outcome, drug regimens for treatment of infections associated ESBL/non-ESBL strains in real-life clinical practice, clinical response rates for patients treated with cephalosporins/other classes of antimicrobial agents, /carbapenems, clinical response for those patients with infection associated with ESBL and non-ESBL-producing strains with MIC values V8 Ag/mL treated with cephalosporins. | GNB      |
| Blomberg B <sup>17</sup>     | 2001-2002 | Tanzania     | Cohort study, prospective   | Non-ESBL-infection                                                                 | Neonates, children    | Pediatric ward  | All-cause mortality                              | Prevalence & clinical implications of ESBL production in EC-,KP-, Salmonellae- septicemia                                                                                                                                                                                                                                                                                                                                                                                                                         | GNB      |
| Pena C <sup>60</sup>         | 1993-1995 | Spain        | Cohort study, prospective   | Non-ESBL-infection                                                                 | All kinds of patients | Entire hospital | Attributable mortality, all-cause mortality      | Clinical epidemiology& outcome of ESBL-KP- bacteraemia, relevance of ESBL strains in mortality of patients with hospital-acquired KP-BSI.                                                                                                                                                                                                                                                                                                                                                                         | KP       |
| Kola A <sup>61</sup>         | 2002-2004 | Germany      | Case cohort study           | Non-ESBL-infection                                                                 | All kinds of patients | Entire hospital | All-cause mortality, LOS, ICU-LOS                | Outcomes of ESBL-EC- and ESBL-KP-infections                                                                                                                                                                                                                                                                                                                                                                                                                                                                       | EC, KP   |
| Isai MH <sup>62</sup>        | 2001-2012 | Taiwan       | Case cohort study           | Control group: non-ESBL-infection, second control group: all hospitalised patients | Neonates at NICU      | NICU            | Attributable mortality, all-cause mortality, LOS | Clinical features& risk factors& molecular epidemiology of ESBL-GNB                                                                                                                                                                                                                                                                                                                                                                                                                                               | GNB      |
| Maslikowska JA <sup>63</sup> | 2010-2013 | Canada       | Case cohort study           | Non-ESBL-infection                                                                 | All kinds of patients | Entire hospital | Attributable mortality, all-cause mortality, LOS | Differences in clinical & microbiological outcome, mortality, and/or hospital resource use: ESBL-EC- and ESBL-Ks- vs non-ESBL-EC- and non-ESBL-Ks-infections                                                                                                                                                                                                                                                                                                                                                      | GNB      |



1  
2  
3  
4  
5  
6  
7  
8  
9  
10  
11  
12  
13  
14  
15  
16  
17  
18  
19  
20  
21  
22  
23  
24  
25  
26  
27  
28  
29  
30  
31  
32  
33  
34  
35  
36  
37  
38  
39  
40  
41  
42  
43  
44  
45  
46

|                                 | Years     | Country                 | Study design                | Control group                                                            | Study population      | Setting          | Outcome definition                                        | Main objective                                                                                                                                                                                     | Pathogen |
|---------------------------------|-----------|-------------------------|-----------------------------|--------------------------------------------------------------------------|-----------------------|------------------|-----------------------------------------------------------|----------------------------------------------------------------------------------------------------------------------------------------------------------------------------------------------------|----------|
| Onken A <sup>64</sup>           | 2012-2013 | Tanzania                | Cohort study, prospective   | Non-ESBL-infection                                                       | All kinds of patients | Entire hospital  | All-cause mortality                                       | Most common bacterial pathogens causing BSI, antimicrobial susceptibility                                                                                                                          | GNB      |
| Nguyen ML <sup>65</sup>         | 2005-2010 | Canada                  | Case cohort study           | Non-ESBL-infection                                                       | All kinds of patients | Entire hospital  | All-cause mortality, LOS, ICU-LOS                         | Risk factors for & patient outcomes associated with ESBL-EC- and ESBL-Ks- bacteraemia, appropriateness of empiric antibiotic therapy & effect of inappropriate empiric therapy on outcomes         | GNB      |
| Denis B <sup>66</sup>           | 2005-2009 | France                  | Case-control study          | Non-ESBL-infection                                                       | All kinds of patients | Entire hospital  | All-cause mortality (28 day), LOS                         | Prevalence & risk factors for ESBL-EC bacteraemia, impact on length of stay & 30day mortality                                                                                                      | EC       |
| Chopra T <sup>67</sup>          | 2004-2009 | USA                     | Case cohort study           | Case 2(Control1): non-ESBL-infection, second control group: no infection | All kinds of patients | Entire hospital  | All-cause mortality (28 day)                              | Predictors of ESBL-EC- and ESBL-KP-BSI, focus on cefepime exposure.                                                                                                                                | EC, KP   |
| Panhotra BR <sup>18</sup>       | 2001-2003 | Kingdom of Saudi Arabia | Case cohort study           | Non-ESBL-infection                                                       | All kinds of patients | Entire hospital  | All-cause mortality                                       | Risk factors & clinical outcome of ESBL-KP-bacteraemia (hospital acquired)                                                                                                                         | KP       |
| Marra AR <sup>19</sup>          | 1996-2001 | Brazil                  | Cohort study, retrospective | Non-ESBL-infection                                                       | All kinds of patients | Entire hospital  | All-cause mortality (14 day)                              | ESBL-KP- associated mortality                                                                                                                                                                      | KP       |
| Skippen I <sup>20</sup>         | 2003-2005 | UK                      | Case cohort study           | Non-ESBL-infection                                                       | All kinds of patients | Entire hospital  | All-cause mortality                                       | Risk factors for & outcomes of ESBL-EC- and ESBL-KP-invasive transmission of organism in the healthcare setting                                                                                    | GNB      |
| Schwaber MJ <sup>21</sup>       | 2000-2003 | Israel                  | Cohort study, retrospective | Non-ESBL-infection                                                       | All kinds of patients | Entire hospital  | Attributable mortality, all-cause mortality               | Outcomes of ESBL-production in Enterobacteriaceae-bacteraemia.                                                                                                                                     | GNB      |
| Apisarnthanarak A <sup>22</sup> | 2003-2004 | Thailand                | Case cohort study           | Control group: non-ESBL-infection, second control group: no infection    | All adult patients    | Entire hospital  | All-cause mortality, LOS                                  | Clinical & molecular epidemiologic factors associated with community onset ESBL-EC- infections, hospital resource utilisation, estimate costs associated with medical care (hospitalised patients) | EC       |
| Umbarello M <sup>23</sup>       | 1999-2003 | Italy                   | Case cohort study           | Non-ESBL-infection                                                       | All kinds of patients | Entire hospital  | Attributable mortality, all-cause mortality, LOS, ICU-LOS | Factors associated with isolation of ESBL- KP-strains                                                                                                                                              | KP       |
| Zeistner R <sup>9</sup>         | 2008-2010 | Germany                 | Cohort study, retrospective | Non-ESBL-infection                                                       | All kinds of patients | Entire hospital, | All-cause mortality, LOS                                  | Difference in mortality: ESBL-EC-BSIs vs. non-ESBL-EC-BSIs, molecular epidemiology of ESBL-positive isolates                                                                                       | EC       |

1  
2  
3  
4  
5  
6  
7  
8  
9  
10  
11  
12  
13  
14  
15  
16  
17  
18  
19  
20  
21  
22  
23  
24  
25  
26  
27  
28  
29  
30  
31  
32  
33  
34  
35  
36  
37  
38  
39  
40  
41  
42  
43  
44  
45  
46

|                               | Years     | Country     | Study design                | Control group                                                         | Study population                                | Setting                       | Outcome definition                | Main objective                                                                                                                                                                                                                                                            | Pathogen |
|-------------------------------|-----------|-------------|-----------------------------|-----------------------------------------------------------------------|-------------------------------------------------|-------------------------------|-----------------------------------|---------------------------------------------------------------------------------------------------------------------------------------------------------------------------------------------------------------------------------------------------------------------------|----------|
| Apisarntharak A <sup>24</sup> | 2003-2004 | Thailand    | Case cohort study           | Control group: non-ESBL-infection, second control group: no infection | All kinds of patients                           | Entire hospital               | All-cause mortality, LOS          | Risk factors for & outcomes of ESBL-EC- and ESBL-KP-infections (healthcare associated)                                                                                                                                                                                    | EC, KP   |
| Kanafani ZA <sup>25</sup>     | 2003      | Lebanon     | Case cohort study           | Non-ESBL-infection                                                    | All kinds of patients                           | Entire hospital               | All-cause mortality, LOS          | Epidemiology of infections with ESBL-EC and ESBL-Ks at AUBMC risk factors & outcomes of infections - focus on effect of prior antibiotic administration & the risks imparted by specific classes of antimicrobial agents                                                  | GNB      |
| Zaoutis TE <sup>26</sup>      | 1999-2003 | USA         | Case cohort study           | Non-ESBL-infection                                                    | Children                                        | Entire hospital               | All-cause mortality, LOS          | Risk factors & outcomes associated with ESBL-EC-and ESBL-KP-BSI                                                                                                                                                                                                           | EC, KP   |
| Goh LC <sup>27</sup>          | 2003-2004 | Malaysia    | Cohort study, retrospective | Non-ESBL-infection                                                    | All kinds of patients                           | Entire hospital               | All-cause mortality, LOS          | Impact of ESBL-KP-respiratory tract infections on hospital mortality, requirement for mechanical ventilation & length stay                                                                                                                                                | KP       |
| Melzer M <sup>28</sup>        | 2003-2005 | UK          | Cohort study, prospective   | Non-ESBL-infection                                                    | All kinds of patients                           | Entire hospital               | All-cause mortality               | Differences in mortality & length of hospital stay & time from bacteraemia to death in patients with ESBL-EC- vs. non-ESBL-EC-bacteremic-infection                                                                                                                        | EC       |
| Song KH <sup>29</sup>         | 2000-2006 | South Korea | Case cohort study           | Non-ESBL-infection                                                    | Patients with spontaneous bacterial peritonitis | Not provided                  | All-cause mortality (28 day)      | Outcomes of ESBL-EC-and ESBL-Ks- vs non-ESBL-EC-and ESBL-Ks-SBP (based on isolation from ascites), impact of ineffective initial antimicrobial therapy on outcome in patients with ESBL-EC- and ESBL-Ks-SBP, risk factors for infection by ESBL-producing microorganisms. | GNB      |
| Bennett JW <sup>30</sup>      | 2004-2008 | USA         | Cohort study, prospective   | Non-ESBL-infection                                                    | ICU-patients                                    | ICU, Surgical ward, Burn unit | All-cause mortality (28 day)      | ESBL types and strain variability, presence of host factors to determine potential role in morbidity and mortality during ESBL-KP-infections                                                                                                                              | KP       |
| Recarichi EM <sup>31</sup>    | 2000-2007 | Italy       | Cohort study, retrospective | Non-ESBL-infection                                                    | Patients with hematological malignancies        | Entire hospital               | All-cause mortality (28 day)      | Risk factors for mortality in patients suffering from hematological malignancies with concurrent EC-bacteraemia. Focus on impact of ESBL- production & fluoroquinolone resistance by bacterial isolates                                                                   | EC       |
| Fuon FF <sup>32</sup>         | 2006-2009 | Brazil      | Cohort study, retrospective | Non-ESBL-infection                                                    | All kinds of patients                           | Entire hospital               | All-cause mortality (28 day), LOS | Risk factors & mortality rate in ESBL-KP-bacteraemia                                                                                                                                                                                                                      | KP       |
| Kang CI <sup>33</sup>         | 2008-2009 | South Korea | Cohort study, retrospective | Non-ESBL-infection                                                    | All kinds of patients                           | Entire hospital               | All-cause mortality (28 day)      | Risk factors of ESBL-EC among community-onset bacteraemia, treatment outcomes                                                                                                                                                                                             | EC       |

1  
2  
3  
4  
5  
6  
7  
8  
9  
10  
11  
12  
13  
14  
15  
16  
17  
18  
19  
20  
21  
22  
23  
24  
25  
26  
27  
28  
29  
30  
31  
32  
33  
34  
35  
36  
37  
38  
39  
40  
41  
42  
43  
44  
45  
46

|                                | Years     | Country     | Study design                | Control group      | Study population                  | Setting                                           | Outcome definition                                                 | Main objective                                                                                                                                                                                                          | Pathogen |
|--------------------------------|-----------|-------------|-----------------------------|--------------------|-----------------------------------|---------------------------------------------------|--------------------------------------------------------------------|-------------------------------------------------------------------------------------------------------------------------------------------------------------------------------------------------------------------------|----------|
| Pena C <sup>34</sup>           | 1996-2003 | Spain       | Cohort study, retrospective | Non-ESBL-infection | All kinds of patients             | Entire hospital                                   | All-cause mortality (28 day)                                       | Risk factors for mortality among patients with EC- infections                                                                                                                                                           | EC       |
| Tumbarello M <sup>35</sup>     | 2006      | Italy       | Cohort study, retrospective | Non-ESBL-infection | All kinds of patients             | ICU, Medical ward, Entire hospital, surgical wide | All-cause mortality (21 day), LOS                                  | Clinical & economic impacts of ESBL production, inadequate Initial Antibiotic Therapy of EC-BSI                                                                                                                         | EC       |
| Kang C <sup>36</sup>           | 2006-2009 | South Korea | Case cohort study           | Non-ESBL-infection | All kinds of patients             | Entire hospital                                   | Attributable mortality, all-cause mortality (28 day)               | Impact of ESBL-producing bacteraemia on outcome in patients with hematologic malignancy.                                                                                                                                | EC, KP   |
| Wu YH <sup>37</sup>            | 2009-2012 | Taiwan      | Cohort study, prospective   | Non-ESBL-infection | All kinds of patients             | Medical ward                                      | LOS                                                                | Host-related risk factors for community-onset UTI due to levofloxacin- or cefazolin-nonsusceptible isolates or uropathogens with ESBL production, clinical impact of UTIs due to antimicrobial-nonsusceptible pathogens | GNB      |
| Rodriguez-Bano J <sup>38</sup> | 2004-2006 | Spain       | Case cohort study           | Non-ESBL-infection | All kinds of patients             | Entire hospital                                   | All-cause mortality (14 day)                                       | Epidemiology & risk factors (focus on previous antimicrobial use) & mortality rate for patients with ESBL-EC-COBSI                                                                                                      | EC       |
| Gürtzke S <sup>39</sup>        | 2008-2011 | Germany     | Cohort study, retrospective | Non-ESBL-infection | All kinds of patients             | Entire hospital                                   | All-cause mortality, LOS                                           | Distribution of ESBL genotypes, hospital mortality in cases of ESBL-KP-BSI                                                                                                                                              | KP       |
| Oh MM <sup>40</sup>            | 2006-2011 | South Korea | Cohort study, retrospective | Non-ESBL-infection | Patients after Prostatitis Biopsy | Entire hospital                                   | LOS                                                                | Impact of ESBL-positive-strains on clinical course & progression to chronic prostatitis in patients with postbiopsy acute prostatitis.                                                                                  | GNB      |
| Leistner R <sup>41</sup>       | 2008-2011 | Germany     | Cohort study, retrospective | Non-ESBL-infection | All kinds of patients             | Entire hospital                                   | All-cause mortality, LOS                                           | Financial disease burden attributable to ESBL-positive species in cases of EC-and KP-BSI                                                                                                                                | EC, KP   |
| Lin JN <sup>40</sup>           | 2005-2009 | Taiwan      | Case cohort study           | Non-ESBL-infection | All kinds of patients             | Emergency Room                                    | Attributable mortality, all-cause mortality (28 day), LOS, ICU-LOS | Clinical & microbiological characteristics, risk factors for acquisition of infection, prescription of initial empirical antibiotics mortality rate of infection                                                        | GNB      |
| Ku NS <sup>42</sup>            | 2006-2010 | South Korea | Case cohort study           | Non-ESBL-infection | All kinds of patients             | Entire hospital                                   | All-cause mortality (28 day)                                       | Clinical usefulness of breakpoints for treatment of Enterobacteriaceae-bacteraemia, (focus on EC- and Ks-bacteraemia): CLSI 2009- vs. CLSI 2010-guidelines.                                                             | EC, KP   |

1  
2  
3  
4  
5  
6  
7  
8  
9  
10  
11  
12  
13  
14  
15  
16  
17  
18  
19  
20  
21  
22  
23  
24  
25  
26  
27  
28  
29  
30  
31  
32  
33  
34  
35  
36  
37  
38  
39  
40  
41  
42  
43  
44  
45  
46

|                             | Years     | Country     | Study design                | Control group                                                         | Study population                                             | Setting         | Outcome definition                                   | Main objective                                                                                                                                                                                                                        | Pathogen |
|-----------------------------|-----------|-------------|-----------------------------|-----------------------------------------------------------------------|--------------------------------------------------------------|-----------------|------------------------------------------------------|---------------------------------------------------------------------------------------------------------------------------------------------------------------------------------------------------------------------------------------|----------|
| Anunnatsiri S <sup>43</sup> | 2005-2006 | Thailand    | Cohort study, retrospective | Non-ESBL-infection                                                    | All kinds of patients                                        | Entire hospital | All-cause mortality, LOS                             | Incidence of ESBL-EC-septicemia, factors associated with infection & clinical outcomes                                                                                                                                                | EC       |
| Kang CI <sup>44</sup>       | 1998-2002 | South Korea | Case cohort study           | Non-ESBL-infection                                                    | All kinds of patients                                        | Hospital-wide   | All-cause mortality (28 day)                         | Risk factors for mortality & treatment outcome of ESBL-EC- and ESBL-KP-BSI                                                                                                                                                            | EC, KP   |
| Raviv Y <sup>45</sup>       | 2004-2007 | Israel      | Cohort study, retrospective | Control group: non-ESBL-infection, second control group: no infection | patients with lung transplantation                           | Not provided    | All-cause mortality (28 day)                         | Outcomes of lung transplant recipients infected by CRKP and ESBL carbapenem-sensitive KP (referred to MDR-KP)                                                                                                                         | KP       |
| Kim HJ <sup>11</sup>        | 2005-2010 | South Korea | Cohort study, retrospective | Non-ESBL-infection                                                    | All kinds of patients                                        | Medical ward    | All-cause mortality (28 day), LOS                    | Clinical outcome of patients with biliary tract infection: ESBL-producing bacterial isolates vs. non-ESBL-producing-bacterial isolates, predictors of poor prognosis, impact of ineffective antimicrobial therapy on clinical outcome | EC, KP   |
| MacVane SH <sup>46</sup>    | 2011-2012 | USA         | Cohort study, retrospective | Non-ESBL-infection                                                    | All kinds of patients                                        | Entire hospital | Attributable mortality, all-cause mortality, LOS     | clinical & economic outcomes of patients with ESBL-EC- and ESBL-KP-UTI vs. non-ESBL-EC- and non-ESBL-KP-UTI                                                                                                                           | EC, KP   |
| Abhilash KP <sup>47</sup>   | 2007      | India       | Cohort study, prospective   | Non-ESBL-infection                                                    | All kinds of patients                                        | Entire hospital | All-cause mortality (14 day)                         | Prevalence & risk factors & outcome of antibiotic treatment among hospitalised patients with ESBL-EC- and ESBL-Ks-BSI                                                                                                                 | GNB      |
| Rhantni M <sup>48</sup>     | 2006      | India       | Cohort study, retrospective | Non-ESBL-infection                                                    | All kinds of patients                                        | Entire hospital | All-cause mortality, LOS                             | Prevalence & impact on clinical outcome of ESBL-production among nosocomial isolates of EC & KP                                                                                                                                       | EC, KP   |
| Han SB <sup>49</sup>        | 2009-2013 | South Korea | Cohort study, retrospective | Non-ESBL-infection                                                    | Children (immunocompromised, with cancer, neutropenic fever) | Pediatric ward  | Attributable mortality, all-cause mortality (28 day) | Clinical outcomes of ESBL-EC- and ESBL-KP-bacteraemia & their antibiotic susceptibilities                                                                                                                                             | EC, KP   |
| Lee S <sup>50</sup>         | 2009-2011 | South Korea | Cohort study, retrospective | Non-ESBL-infection                                                    | Patients with Acute Pyelonephritis                           | Entire hospital | All-cause mortality (14 day), LOS                    | Impact of ESBL on clinical outcomes of Acute Pyelonephritis treated with empirical ceftriaxone (which was inappropriate for ESBL-producing organisms)                                                                                 | EC       |
| Artero A <sup>68</sup>      | 2013-2015 | Spain       | Cohort study, prospective   | Non-ESBL-infection                                                    | Elderly                                                      | Medical ward    | All-cause mortality, LOS                             | Identify clinical factors to predict ESBL-EC among elderly patients with UTI admitted to hospital in a high rate setting of ESBL-EC                                                                                                   | EC       |

1  
2  
3  
4  
5  
6  
7  
8  
9  
10  
11  
12  
13  
14  
15  
16  
17  
18  
19  
20  
21  
22  
23  
24  
25  
26  
27  
28  
29  
30  
31  
32  
33  
34  
35  
36  
37  
38  
39  
40  
41  
42  
43  
44  
45  
46

|                                   | Years     | Country  | Study design                | Control group      | Study population                                                                                        | Setting                                      | Outcome definition                | Main objective                                                                                                                                                                                               | Pathogen         |
|-----------------------------------|-----------|----------|-----------------------------|--------------------|---------------------------------------------------------------------------------------------------------|----------------------------------------------|-----------------------------------|--------------------------------------------------------------------------------------------------------------------------------------------------------------------------------------------------------------|------------------|
| Chen IL <sup>69</sup>             | 2004-2015 | Taiwan   | Cohort study, retrospective | Non-ESBL-infection | Neonates                                                                                                | Neonatal ward                                | All-cause mortality               | Compare the clinical characteristics & laboratory data of preterm babies with EC BSI: survival vs. nonsurvival groups, ESBL vs non-ESBL groups, determine the predictive factors of EC BSI in preterm babies | EC               |
| Islas-Munoz B <sup>70</sup>       | 2016-2017 | Mexico   | Cohort study, prospective   | Non-ESBL-infection | Cancer patients                                                                                         | Oncological ward                             | All-cause mortality (28 day)      | Evaluate the clinical epidemiological characteristics & risk factors associated with mortality in cancer patients with BSI-special emphasis on MDR bacteria                                                  | GNB (and others) |
| Ma J <sup>71</sup>                | 2012-2015 |          | Cohort study, retrospective | Non-ESBL-infection | Patients with hematological diseases                                                                    | Entire hospital                              | All-cause mortality (28 day)      | Evaluate the antimicrobial resistance & clinical features & risk factors for septic shock & death of nosocomial EC-BSI                                                                                       | EC               |
| Man MY <sup>72</sup>              | 2009-2016 | China    | Cohort study, retrospective | Non-ESBL-infection | All kinds of patients, except patients from Burn unit, transplant surgery ward or with thoracic therapy | Entire hospital                              | All-cause mortality (28 day)      | Evaluate the incidence & clinical characteristics & outcomes of patients with KP BSI in critical care & general ward settings                                                                                | KP               |
| Marando R <sup>73</sup>           | 2016      | Tanzania | Cohort study, prospective   | Non-ESBL-infection | Neonates                                                                                                | NICU                                         | All-cause mortality               | Investigate factors associated with ESBL-PE neonatal sepsis & mortality among neonates, characterise selected isolates to show virulence potential & transmission dynamics                                   | GNB              |
| Namikawa H <sup>74</sup>          | 2011-2015 | Japan    | Cohort study, retrospective | Non-ESBL-infection | All kinds of patients                                                                                   | Entire hospital                              | All-cause mortality               | Investigate clinical characteristics of patients with ESBL-EC-BSI                                                                                                                                            | EC               |
| Shi SH <sup>75</sup>              | 2008-2015 | China    | Cohort study, retrospective | Non-ESBL-infection | Patients with pyogenic liver abscess                                                                    | Centre for hepatopancreaticobiliary diseases | All-cause mortality, LOS          | Aetiology & morbidity & clinical characteristics of pyogenic liver abscess caused by ESBL-PE                                                                                                                 | GN               |
| Tanir Basaranoglu S <sup>76</sup> | 2011-2015 | Turkey   | Cohort study, retrospective | Non-ESBL-infection | Children                                                                                                | Pediatric ward                               | All-cause mortality (28 day)      | Assess risk factors for health care associated ESBL-KP-BSI in children, analyze clinical outcomes: ESBL-KP vs. non-ESBL-KP                                                                                   | KP               |
| Bazazi K <sup>77</sup>            | 2009-2015 | France   | Cohort study, prospective   | Non-ESBL-infection | ICU-patients                                                                                            | ICU                                          | All-cause mortality, LOS, ICU-LOS | Determine, among ESBL-PE carriers, the prevalence & associated factors & clinical impact of ESBL-PE pneumonia, determine factors associated with ICUAP caused by carbapenem-resistant bacteria               | GNB              |

1  
2  
3  
4  
5  
6  
7  
8  
9  
10  
11  
12  
13  
14  
15  
16  
17  
18  
19  
20  
21  
22  
23  
24  
25  
26  
27  
28  
29  
30  
31  
32  
33  
34  
35  
36  
37  
38  
39  
40  
41  
42  
43  
44  
45  
46

|                            | Years     | Country      | Study design                | Control group                                                         | Study population      | Setting              | Outcome definition                                                 | Main objective                                                                                                                                                                                                       | Pathogen |
|----------------------------|-----------|--------------|-----------------------------|-----------------------------------------------------------------------|-----------------------|----------------------|--------------------------------------------------------------------|----------------------------------------------------------------------------------------------------------------------------------------------------------------------------------------------------------------------|----------|
| Ray S <sup>78</sup>        | 2014-2016 | India        | Cohort study, prospective   | Non-ESBL-infection                                                    | ICU-patients          | ICU                  | All-cause mortality                                                | Investigate spectrum of microbial resistance pattern in the community and their effects on mortality                                                                                                                 | GNB      |
| Haruki Y <sup>79</sup>     | 2006-2016 | Japan        | Cohort study, retrospective | Non-ESBL-infection                                                    | ICU-patients          | ICU                  | All-cause mortality                                                | Compare the clinical characteristics & outcomes of critically ill patients in an ICU, who were hospitalised for BSI caused by ESBL-EC or non-ESBL-EC.                                                                | GNB      |
| Lin WT <sup>80</sup>       | 2009-2014 | Taiwan       | Cohort study, retrospective | Non-ESBL-infection                                                    | All kinds of patients | Entire hospital      | All-cause mortality                                                | Investigate the clinical manifestations & bacteriological features of culture-proven, GNB arthritis                                                                                                                  | GNB      |
| Guys H <sup>81</sup>       | 2006-2011 | South Africa | Cohort study, retrospective | Non-ESBL-infection                                                    | Children              | Pediatric ward       | All-cause mortality                                                | Describe the clinical presentation of KPBSI, risk factors associated with ESBL-KPBSI, antibiotic susceptibility patterns of the KP isolates & KPBSI mortality including factors associated with in-patient mortality | KP       |
| Lee CC <sup>82</sup>       | 2008-2013 | Taiwan       | Cohort study, retrospective | Non-ESBL-infection                                                    | All kinds of patients | Emergency Department | Attributable mortality, all-cause mortality (28 day), LOS, ICU-LOS | Analyse the impact of ESBL-producing isolates on the outcome of bacteremic patient after controlling for baseline patient characteristics & bacteraemia severity by using a propensity-matched analysis (PSM)        | GNB      |
| Huang YY <sup>83</sup>     | 2011-2013 | Canada       | Case cohort study           | Non-ESBL-infection                                                    | All kinds of patients | Entire hospital      | All-cause mortality, LOS                                           | Determine cumulative incidence of ESBL urosepsis, identify major risk factors for ESBL urosepsis, determine impact of international travel on development of ESBL urosepsis                                          | EC, KP   |
| Komatsu Y <sup>84</sup>    | 2008-2013 | Japan        | Case cohort study           | Non-ESBL-infection                                                    | All kinds of patients | Entire hospital      | All-cause mortality (14 day)                                       | Identify risk factors & clinical outcomes in patients with BSI due to ESBL- or carbapenemase-producing EC, determine prevalence & genetic background                                                                 | EC       |
| Liu MM <sup>85</sup>       | 2011-2016 | China        | Case cohort study           | Control group: non-ESBL-infection, second control group: no infection | ICU-patients          | ICU                  | All-cause mortality                                                | Identify risk factors for ESBL-producing ECBSI among carriers at ICU                                                                                                                                                 | EC       |
| Nivesvivat T <sup>86</sup> | 2010-2017 | Thailand     | Cohort study, retrospective | Non-ESBL-infection                                                    | Children              | Pediatric ward       | All-cause mortality, LOS                                           | Determine prevalence, risk factors & clinical outcomes of ESBL-producing EB in paediatric BSI                                                                                                                        | EC, KP   |

1  
2  
3  
4  
5  
6  
7  
8  
9  
10  
11  
12  
13  
14  
15  
16  
17  
18  
19  
20  
21  
22  
23  
24  
25  
26  
27  
28  
29  
30  
31  
32  
33  
34  
35  
36  
37  
38  
39  
40  
41  
42  
43  
44  
45  
46

|                          | Years     | Country | Study design                | Control group      | Study population                                                | Setting         | Outcome definition                           | Main objective                                                                                                                                                                                                                                                                                                                                                                            | Pathogen |
|--------------------------|-----------|---------|-----------------------------|--------------------|-----------------------------------------------------------------|-----------------|----------------------------------------------|-------------------------------------------------------------------------------------------------------------------------------------------------------------------------------------------------------------------------------------------------------------------------------------------------------------------------------------------------------------------------------------------|----------|
| Cordery RJ <sup>87</sup> | 2004-2006 | UK      | Cohort study, retrospective | Non-ESBL-infection | ICU-patients                                                    | ICU             | All-cause mortality                          | Elucidate specific risk factors for the acquisition of ESBL infection in the ICU; all-cause mortality (in ICU) compared in patients with infections due to ESBL- and non-ESBL-producing organisms                                                                                                                                                                                         | GNB      |
| Paikos GL <sup>88</sup>  | 2003-2005 | Greece  | Cohort study, prospective   | Non-ESBL-infection | All kinds of patients                                           | Entire hospital | All-cause mortality                          | Identify risk factors associated BSI caused by integron-carrying EB; evaluate the consequences of these genetic elements on patient outcome                                                                                                                                                                                                                                               | GNB      |
| Gudiol C <sup>89</sup>   | 2006-2008 | Spain   | Cohort study, prospective   | Non-ESBL-infection | Cancer patients and hematopoietic stem cell transplant patients | Entire hospital | All-cause mortality                          | Assess clinical features, risk factors, molecular epidemiology & outcome of ESBLEC BSI in hospitalised cancer patients                                                                                                                                                                                                                                                                    | EC       |
| Marchaim D <sup>90</sup> | 2006-2008 | Israel  | Cohort study, prospective   | Non-ESBL-infection | All kinds of patients                                           | Entire hospital | All-cause mortality, LOS                     | Define predictors & outcomes of ESBL BSI among patients with bacteraemia due to EB upon hospital admission                                                                                                                                                                                                                                                                                | GNB      |
| Menashe G <sup>91</sup>  | 1997      | Israel  | Cohort study, retrospective | Non-ESBL-infection | All kinds of patients                                           | Entire hospital | All-cause mortality                          | Determine: prevalence of ESBL-P organisms among adult patients with nosocomial EB BSI treated in our institution; association between ESBL production & resistance to other antibiotics; clinical characteristics of patients with nosocomial ESBL-P BSI compared with those infected with non-producing strains; impact of ESBL production on outcome of patients with nosocomial EB BSI | GNB      |
| Ortega M <sup>92</sup>   | 1991-2007 | Spain   | Cohort study, prospective   | Non-ESBL-infection | All kinds of patients                                           | Entire hospital | All-cause mortality                          | Describe source, resistance rate to fluoroquinolone & beta-lactam antibiotics and mortality of EC BSI episodes in a single institution; identify predictive factors for isolation of fluoroquinolone-resistant or ESBL- producing strains.                                                                                                                                                | EC       |
| Sziglyi M <sup>93</sup>  | 2005-2008 | Hungary | Cohort study, retrospective | Non-ESBL-infection | All kinds of patients                                           | Entire hospital | Attributable mortality, all-cause mortality, | Investigate risk factors for & outcomes of BSI caused by ESBL-producing and ESBL-non-producing KP                                                                                                                                                                                                                                                                                         | KP       |
| Tsai SS <sup>94</sup>    | 2005-2006 | Taiwan  | Cohort study, retrospective | Non-ESBL-infection | Diabetic patients                                               | Entire hospital | All-cause mortality                          | Analyze characteristics, risk factors & outcomes of diabetic patients with community- vs. hospital-acquired KP BSI                                                                                                                                                                                                                                                                        | KP       |

1  
2  
3 EC = *Escherichia coli*  
4 KP = *Klebsiella pneumoniae*  
5 GNB = Gram-negative bacteria  
6 BSI = Bloodstream infection  
7 UTI = Urinary tract infection  
8 ICU = Intensive care unit  
9 NICU = Neonatal intensive care unit  
10 ESBL-PE = Extended-spectrum beta-lactamase-producing Enterobacteriaceae  
11 EB = Enterobacteriaceae  
12 LOS = Length of stay  
13  
14  
15  
16  
17  
18  
19  
20  
21  
22  
23  
24  
25  
26  
27  
28  
29  
30  
31  
32  
33  
34  
35  
36  
37  
38  
39  
40  
41  
42  
43  
44  
45  
46

For peer review only



**Supplementary figure S1: Pooled risk ratios for all-cause mortality in patients with ESBL bloodstream infections compared to patients with non-ESBL bloodstream infections—all subgroups**

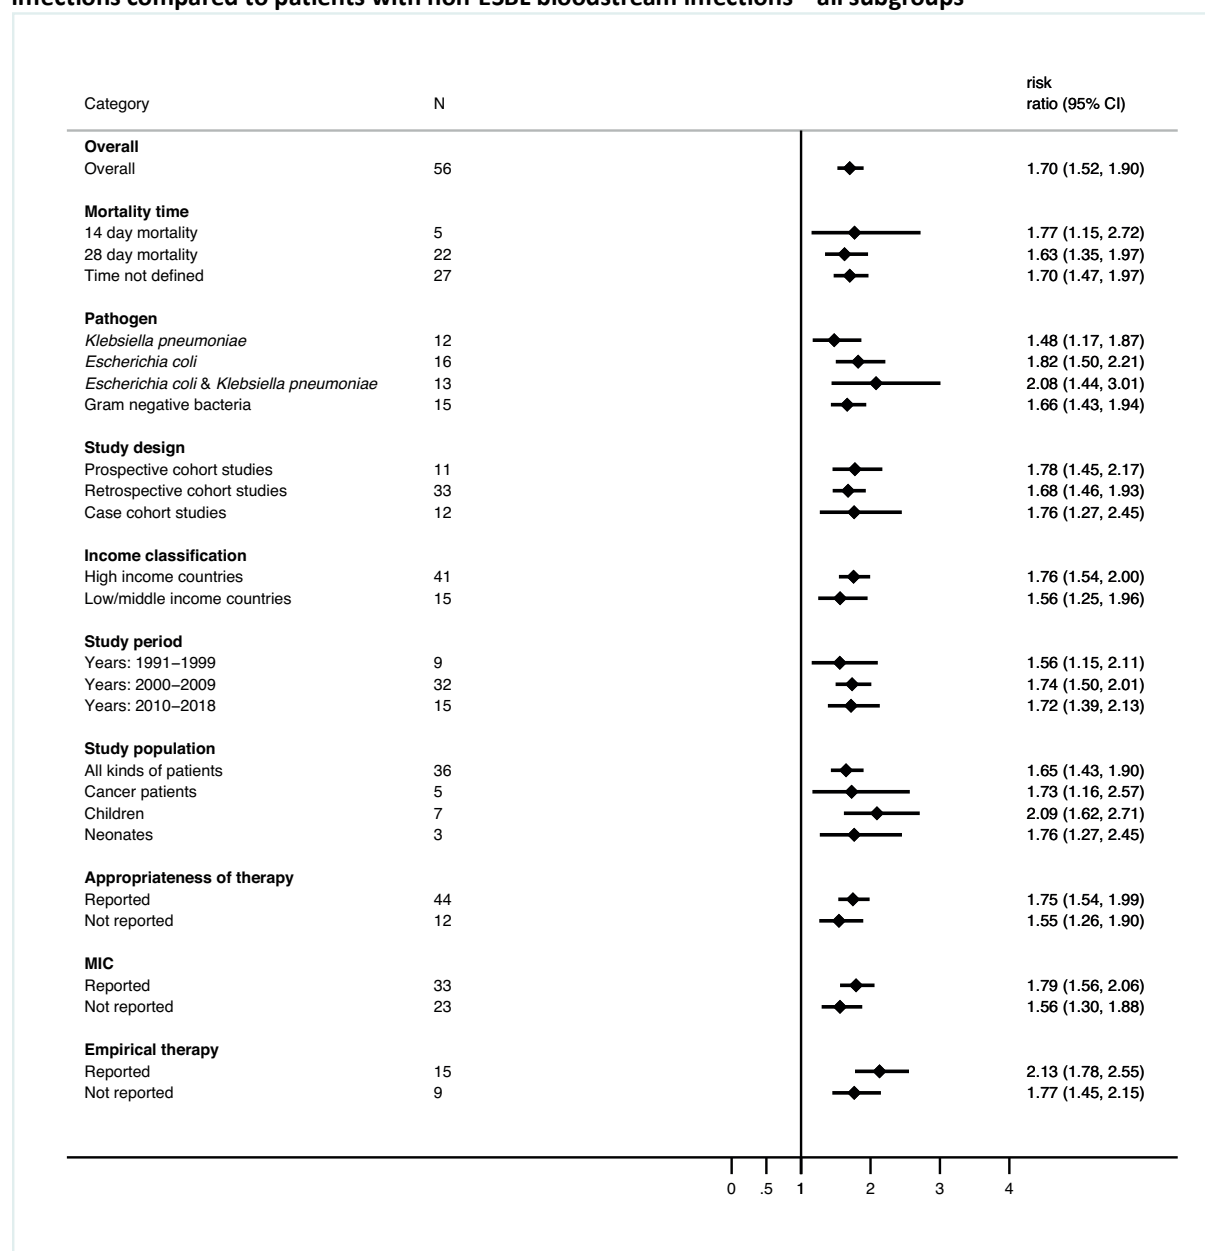

**Supplementary figure S2: Pooled risk ratios for all-cause mortality in patients with noninvasive ESBL infections compared to patients with noninvasive non-ESBL infections**

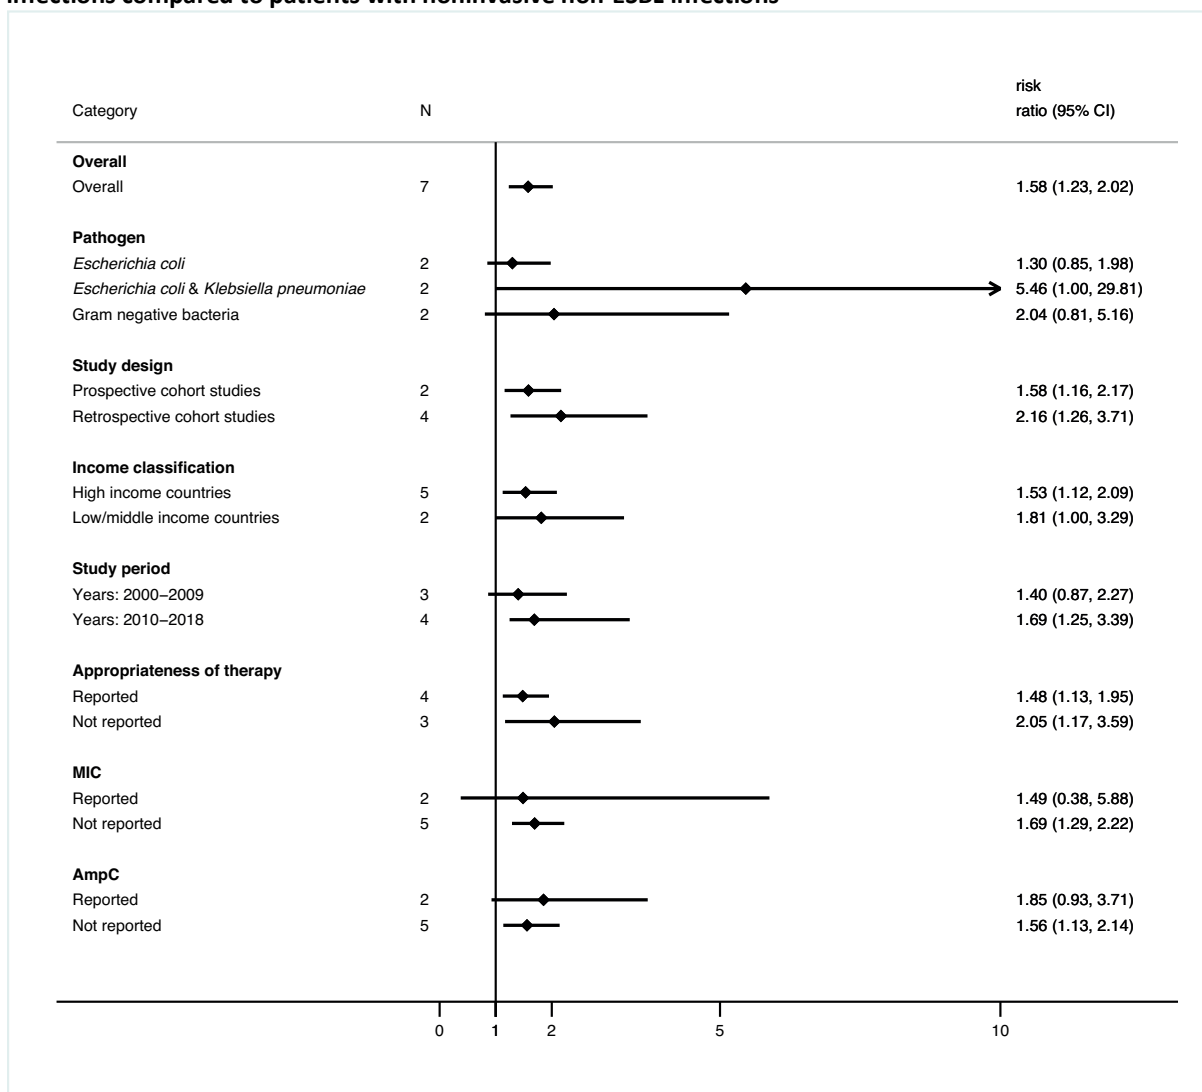

Only

**Supplementary figure S3: Weighted mean differences in length of hospital stay in patients with noninvasive ESBL infections compared to patients with noninvasive non-ESBL infections**

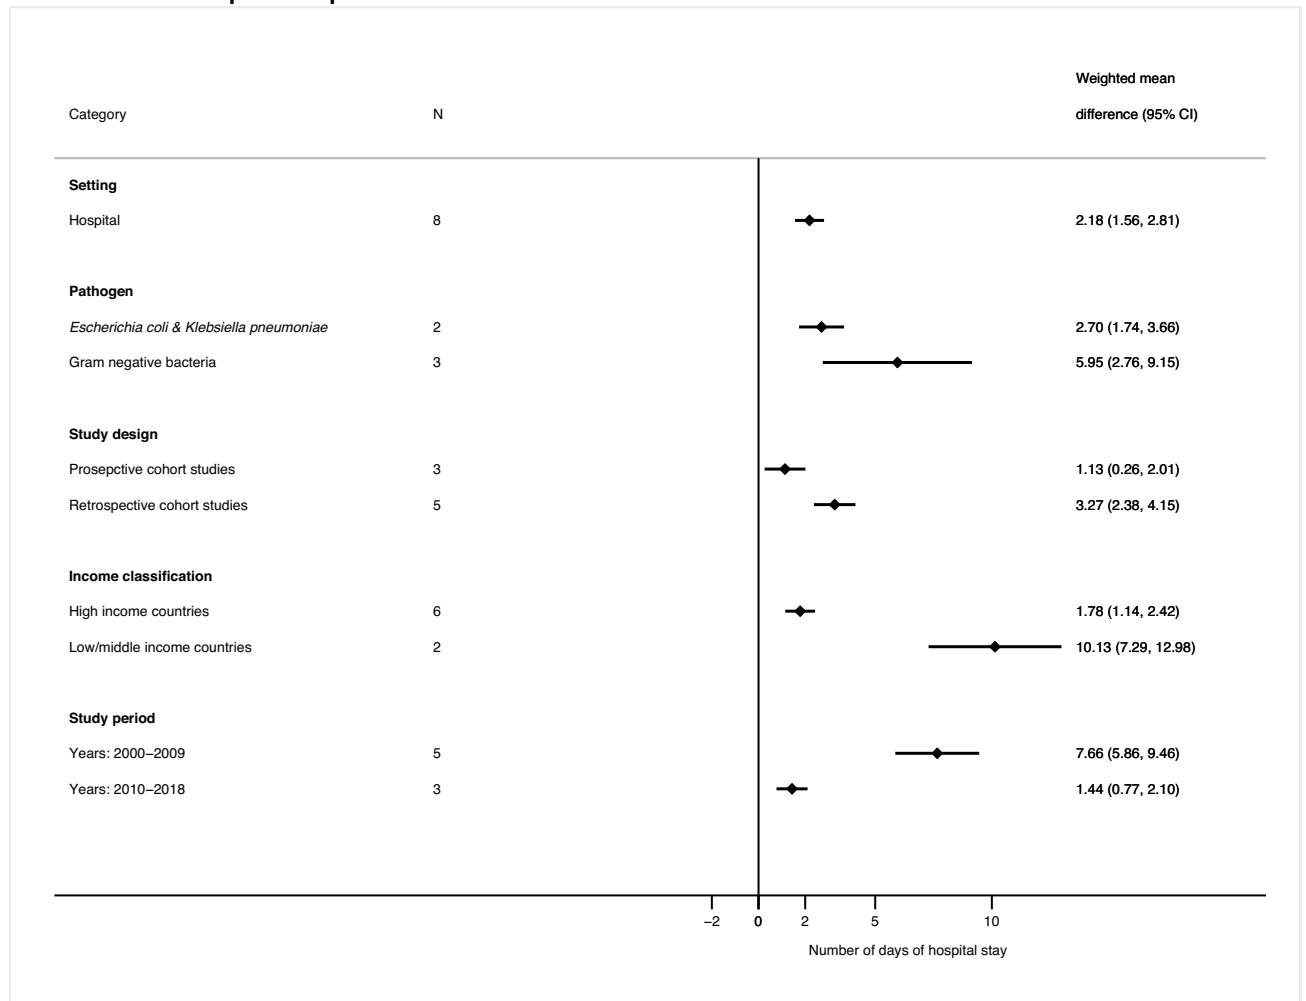

Supplementary figure S4: Funnel plot of risk ratios for all-cause mortality in patients with ESBL bloodstream infections compared to patients with non-ESBL bloodstream infections

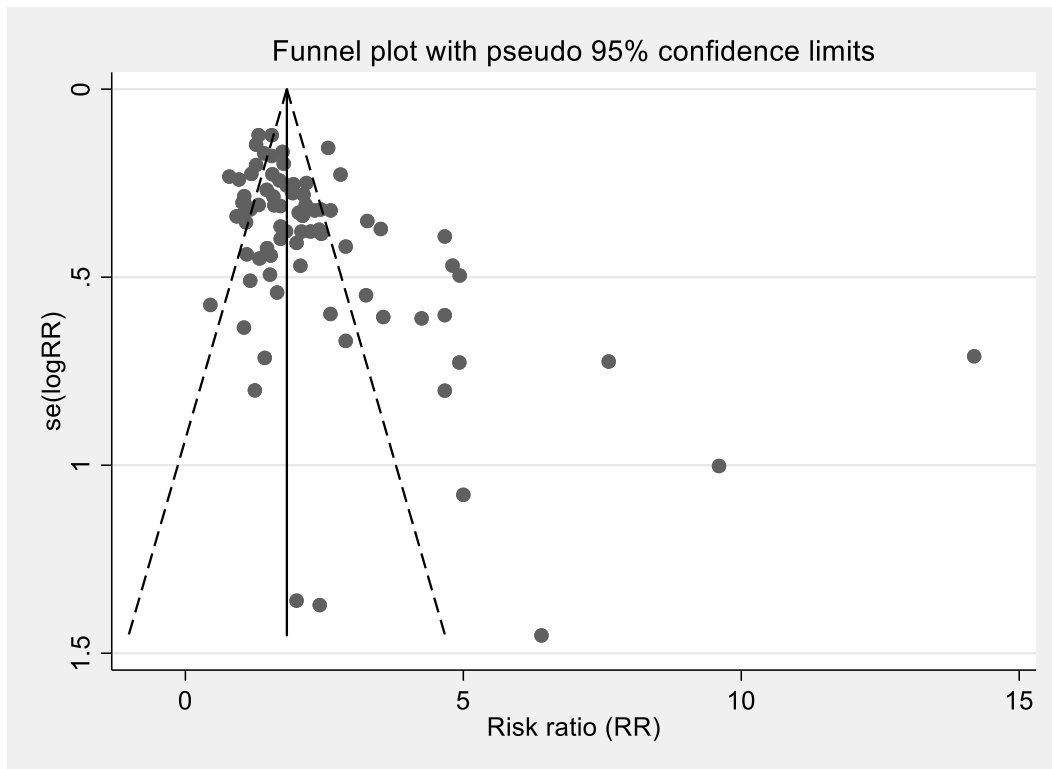

Supplementary figure S5: Funnel plot of weighted mean differences in the length of stay for patients with ESBL bloodstream infections compared to patients with non-ESBL bloodstream infections

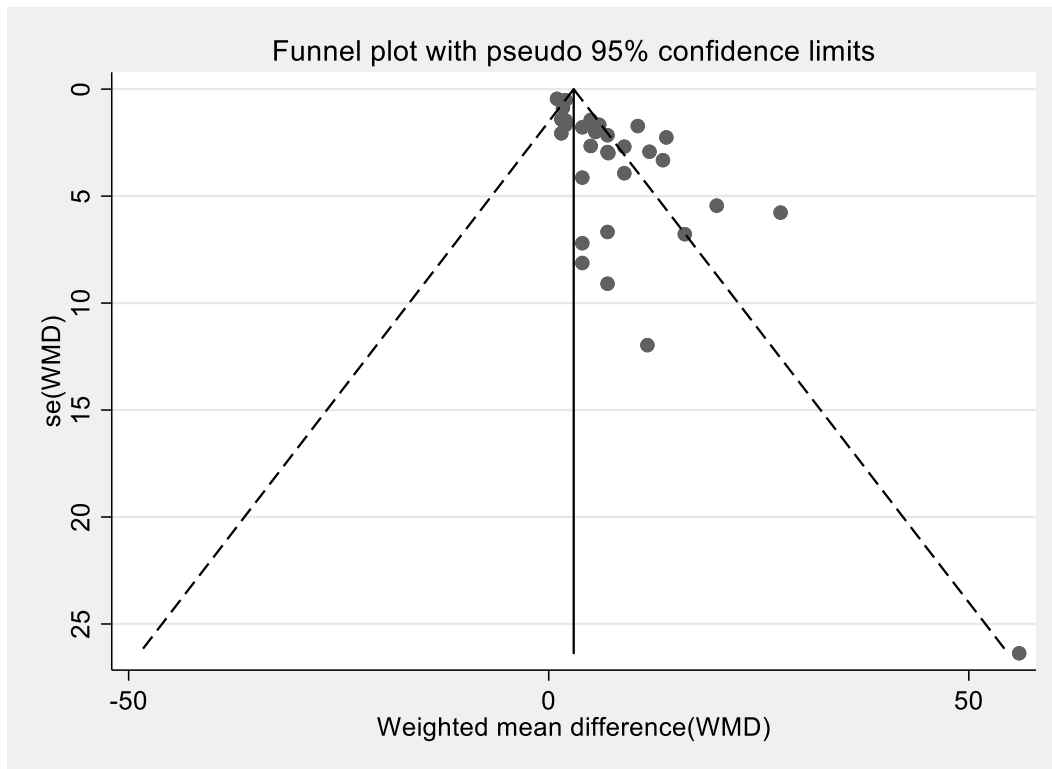

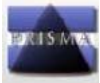

# PRISMA 2009 Checklist

1  
2  
3  
4  
5  
6  
7  
8  
9  
10  
11  
12  
13  
14  
15  
16  
17  
18  
19  
20  
21  
22  
23  
24  
25  
26  
27  
28  
29  
30  
31  
32  
33  
34  
35  
36  
37  
38  
39  
40  
41  
42  
43  
44  
45  
46  
47

| Section/topic                      | #  | Checklist item                                                                                                                                                                                                                                                                                              | Reported on page # |
|------------------------------------|----|-------------------------------------------------------------------------------------------------------------------------------------------------------------------------------------------------------------------------------------------------------------------------------------------------------------|--------------------|
| <b>TITLE</b>                       |    |                                                                                                                                                                                                                                                                                                             |                    |
| Title                              | 1  | Identify the report as a systematic review, meta-analysis, or both.                                                                                                                                                                                                                                         | 1                  |
| <b>ABSTRACT</b>                    |    |                                                                                                                                                                                                                                                                                                             |                    |
| Structured summary                 | 2  | Provide a structured summary including, as applicable: background; objectives; data sources; study eligibility criteria, participants, and interventions; study appraisal and synthesis methods; results; limitations; conclusions and implications of key findings; systematic review registration number. | 2                  |
| <b>INTRODUCTION</b>                |    |                                                                                                                                                                                                                                                                                                             |                    |
| Rationale                          | 3  | Describe the rationale for the review in the context of what is already known.                                                                                                                                                                                                                              | 4                  |
| Objectives                         | 4  | Provide an explicit statement of questions being addressed with reference to participants, interventions, comparisons, outcomes, and study design (PICOS).                                                                                                                                                  | 4                  |
| <b>METHODS</b>                     |    |                                                                                                                                                                                                                                                                                                             |                    |
| Protocol and registration          | 5  | Indicate if a review protocol exists, if and where it can be accessed (e.g., Web address), and, if available, provide registration information including registration number.                                                                                                                               | 6                  |
| Eligibility criteria               | 6  | Specify study characteristics (e.g., PICOS, length of follow-up) and report characteristics (e.g., years considered, language, publication status) used as criteria for eligibility, giving rationale.                                                                                                      | 5                  |
| Information sources                | 7  | Describe all information sources (e.g., databases with dates of coverage, contact with study authors to identify additional studies) in the search and date last searched.                                                                                                                                  | 4                  |
| Search                             | 8  | Present full electronic search strategy for at least one database, including any limits used, such that it could be repeated.                                                                                                                                                                               | 4                  |
| Study selection                    | 9  | State the process for selecting studies (i.e., screening, eligibility, included in systematic review, and, if applicable, included in the meta-analysis).                                                                                                                                                   | 5                  |
| Data collection process            | 10 | Describe method of data extraction from reports (e.g., piloted forms, independently, in duplicate) and any processes for obtaining and confirming data from investigators.                                                                                                                                  | 5                  |
| Data items                         | 11 | List and define all variables for which data were sought (e.g., PICOS, funding sources) and any assumptions and simplifications made.                                                                                                                                                                       | 5                  |
| Risk of bias in individual studies | 12 | Describe methods used for assessing risk of bias of individual studies (including specification of whether this was done at the study or outcome level), and how this information is to be used in any data synthesis.                                                                                      | 6                  |
| Summary measures                   | 13 | State the principal summary measures (e.g., risk ratio, difference in means).                                                                                                                                                                                                                               | 5                  |
| Synthesis of results               | 14 | Describe the methods of handling data and combining results of studies, if done, including measures of consistency (e.g., I <sup>2</sup> ) for each meta-analysis.                                                                                                                                          | 5,6                |

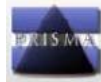

# PRISMA 2009 Checklist

Page 1 of 2

| Section/topic                 | #  | Checklist item                                                                                                                                                                                           | Reported on page #       |
|-------------------------------|----|----------------------------------------------------------------------------------------------------------------------------------------------------------------------------------------------------------|--------------------------|
| Risk of bias across studies   | 15 | Specify any assessment of risk of bias that may affect the cumulative evidence (e.g., publication bias, selective reporting within studies).                                                             | 6                        |
| Additional analyses           | 16 | Describe methods of additional analyses (e.g., sensitivity or subgroup analyses, meta-regression), if done, indicating which were pre-specified.                                                         | 6                        |
| <b>RESULTS</b>                |    |                                                                                                                                                                                                          |                          |
| Study selection               | 17 | Give numbers of studies screened, assessed for eligibility, and included in the review, with reasons for exclusions at each stage, ideally with a flow diagram.                                          | 6                        |
| Study characteristics         | 18 | For each study, present characteristics for which data were extracted (e.g., study size, PICOS, follow-up period) and provide the citations.                                                             | suppl.material           |
| Risk of bias within studies   | 19 | Present data on risk of bias of each study and, if available, any outcome level assessment (see item 12).                                                                                                | 8                        |
| Results of individual studies | 20 | For all outcomes considered (benefits or harms), present, for each study: (a) simple summary data for each intervention group (b) effect estimates and confidence intervals, ideally with a forest plot. | 21-23 and suppl.material |
| Synthesis of results          | 21 | Present results of each meta-analysis done, including confidence intervals and measures of consistency.                                                                                                  | 6-8                      |
| Risk of bias across studies   | 22 | Present results of any assessment of risk of bias across studies (see Item 15).                                                                                                                          | 8                        |
| Additional analysis           | 23 | Give results of additional analyses, if done (e.g., sensitivity or subgroup analyses, meta-regression [see Item 16]).                                                                                    | 7,8                      |
| <b>DISCUSSION</b>             |    |                                                                                                                                                                                                          |                          |
| Summary of evidence           | 24 | Summarize the main findings including the strength of evidence for each main outcome; consider their relevance to key groups (e.g., healthcare providers, users, and policy makers).                     | 8                        |
| Limitations                   | 25 | Discuss limitations at study and outcome level (e.g., risk of bias), and at review-level (e.g., incomplete retrieval of identified research, reporting bias).                                            | 9                        |
| Conclusions                   | 26 | Provide a general interpretation of the results in the context of other evidence, and implications for future research.                                                                                  | 9                        |
| <b>FUNDING</b>                |    |                                                                                                                                                                                                          |                          |
| Funding                       | 27 | Describe sources of funding for the systematic review and other support (e.g., supply of data); role of funders for the systematic review.                                                               | 10                       |

From: Moher D, Liberati A, Tetzlaff J, Altman DG, The PRISMA Group (2009). Preferred Reporting Items for Systematic Reviews and Meta-Analyses: The PRISMA Statement. PLoS Med 6(7): e1000097. doi:10.1371/journal.pmed1000097

For more information, visit: [www.prisma-statement.org](http://www.prisma-statement.org).

For peer review only - <http://bmjopen.bmj.com/site/about/guidelines.xhtml>

# BMJ Open

## Variation of effect estimates in the analysis of mortality and length of hospital stay in patients with infections caused by bacteria producing extended-spectrum beta-lactamases: a systematic review and meta-analysis

|                                 |                                                                                                                                                                                                                                                                                                                                                                                                                                                                                                                                                                                                                                                                                                                                                                                                                                                                                                                                                                                                                                                                                                                                            |
|---------------------------------|--------------------------------------------------------------------------------------------------------------------------------------------------------------------------------------------------------------------------------------------------------------------------------------------------------------------------------------------------------------------------------------------------------------------------------------------------------------------------------------------------------------------------------------------------------------------------------------------------------------------------------------------------------------------------------------------------------------------------------------------------------------------------------------------------------------------------------------------------------------------------------------------------------------------------------------------------------------------------------------------------------------------------------------------------------------------------------------------------------------------------------------------|
| Journal:                        | <i>BMJ Open</i>                                                                                                                                                                                                                                                                                                                                                                                                                                                                                                                                                                                                                                                                                                                                                                                                                                                                                                                                                                                                                                                                                                                            |
| Manuscript ID                   | bmjopen-2019-030266.R1                                                                                                                                                                                                                                                                                                                                                                                                                                                                                                                                                                                                                                                                                                                                                                                                                                                                                                                                                                                                                                                                                                                     |
| Article Type:                   | Original research                                                                                                                                                                                                                                                                                                                                                                                                                                                                                                                                                                                                                                                                                                                                                                                                                                                                                                                                                                                                                                                                                                                          |
| Date Submitted by the Author:   | 19-Sep-2019                                                                                                                                                                                                                                                                                                                                                                                                                                                                                                                                                                                                                                                                                                                                                                                                                                                                                                                                                                                                                                                                                                                                |
| Complete List of Authors:       | Shamsrizi, Parichehr; University Hospital Tubingen Department of Internal Medicine I Gastroenterology Hepatology and Infectious Diseases, Division of Infectious Disease<br>Gladstone, Beryl Primrose ; University Hospital Tubingen Department of Internal Medicine I Gastroenterology Hepatology and Infectious Diseases, Division of Infectious Disease<br>Carrara, Elena; Integrated University Hospital of Verona, Division of Infectious Disease, Department of Diagnostic and Public Health<br>Luise, Dora; Integrated University Hospital of Verona, Division of Infectious Disease, Department of Diagnostic and Public Health<br>Cona, Andrea; ASST Santi Paolo e Carlo, Clinic of Infectious and Tropical Diseases, Department of Health Sciences<br>Bovo, Chiara; Integrated University Hospital of Verona, Medical Direction<br>Tacconelli, Evelina; University Hospital Tubingen Department of Internal Medicine I Gastroenterology Hepatology and Infectious Diseases, Division of Infectious Disease; Integrated University Hospital of Verona, Division of Infectious Disease, Department of Diagnostic and Public Health |
| <b>Primary Subject Heading</b>: | Infectious diseases                                                                                                                                                                                                                                                                                                                                                                                                                                                                                                                                                                                                                                                                                                                                                                                                                                                                                                                                                                                                                                                                                                                        |
| Secondary Subject Heading:      | Infectious diseases, Epidemiology                                                                                                                                                                                                                                                                                                                                                                                                                                                                                                                                                                                                                                                                                                                                                                                                                                                                                                                                                                                                                                                                                                          |
| Keywords:                       | Extended-spectrum beta-lactamase, mortality, bloodstream infection, length of stay, meta-analysis, systematic review                                                                                                                                                                                                                                                                                                                                                                                                                                                                                                                                                                                                                                                                                                                                                                                                                                                                                                                                                                                                                       |
|                                 |                                                                                                                                                                                                                                                                                                                                                                                                                                                                                                                                                                                                                                                                                                                                                                                                                                                                                                                                                                                                                                                                                                                                            |

SCHOLARONE™  
Manuscripts



1  
2  
3 1 **Variation of effect estimates in the analysis of mortality and length of hospital stay in**  
4 **patients with infections caused by bacteria producing extended-spectrum beta-**  
5 **lactamases: a systematic review and meta-analysis**  
6  
7  
8  
9 4

10 5 **AUTHORS:**

11 6 Parichehr Shamsrizi<sup>1</sup>, Beryl Primrose Gladstone<sup>1</sup>, Elena Carrara<sup>2</sup>, Dora Luise<sup>2</sup>, Andrea Cona<sup>3</sup>,  
12 7 Chiara Bovo<sup>4</sup>, Evelina Tacconelli<sup>1,2</sup>  
13  
14  
15 8

16  
17 9 **AFFILIATIONS:**

- 18  
19 10 1) Division of Infectious Disease, Department of Internal Medicine I, DZIF Partner site,  
20 11 Tübingen University Hospital, Tübingen, Germany  
21  
22 12 2) Division of Infectious Disease, Department of Diagnostic and Public Health, University  
23 13 Hospital of Verona, Verona, Italy  
24  
25 14 3) Clinic of Infectious and Tropical Diseases, Department of Health Sciences, ASST Santi  
26 15 Paolo e Carlo, University of Milan, Milan, Italy.  
27  
28 16 4) Medical Direction, University Hospital of Verona, Verona, Italy  
29  
30  
31 17

32 18 **CORRESPONDING AUTHOR:** Elena Carrara, MD

33  
34 19 **Address:** Division of Infectious Disease, Department of Diagnostic and Public Health,  
35 20 University Hospital of Verona, Verona, Italy  
36  
37 21 Piazzale L.A. Scuro 10, Dipartimento di Malattie Infettive, Policlinico Borgo Roma, 37100  
38 22 Verona, Italy.  
39

40  
41 23 **Phone number:** +39 3339566252

42  
43 24 **Email:** elena.carrara@univr.it  
44  
45 25

46 26 **WORD COUNT:** 2701  
47  
48  
49  
50  
51  
52  
53  
54  
55  
56  
57  
58  
59  
60

## 1 ABSTRACT

2 **Objective** To assess the variation of effect estimates in the analysis of mortality and length of  
3 stay (LOS) in patients with infections caused by extended-spectrum beta-lactamase (ESBL)-  
4 producing *Enterobacteriaceae*.

5 **Design** Systematic review and meta-analysis

6 **Methods** Literature search for clinical studies from 1 January 1960 to 1 October 2018 was  
7 conducted in PubMed. Primary outcomes were risk ratios (RRs) of all-cause and attributable  
8 mortality and weighted mean differences (WMDs) in LOS in patients with bloodstream  
9 infections (BSIs) and non-invasive infections. Any change in the effect estimates was  
10 assessed by grouping studies according to design, setting, economy-based country  
11 classification, reporting period, microbiological aetiology, infection type, and adjustment for  
12 appropriateness of empirical treatment. The impact of ESBL production was calculated using  
13 random effect meta-analysis and heterogeneity was evaluated by  $I^2$  statistics and  
14 metaregression.

15 **Results** Eighty-four studies including 22,030 patients and 149 outcome measures were included  
16 in the meta-analysis. Most studies were retrospective cohorts from high-income countries,  
17 providing unadjusted estimates. ESBL production in patients with BSIs (56 studies) increased  
18 the RR for all-cause mortality by a factor of 1.70 (95% CI: 1.52-1.90;  $p < 0.001$ ), attributable  
19 mortality (16 studies) by 1.75 (95% CI: 1.448-2.108;  $p < 0.001$ ), and WMD in the intensive care  
20 unit by 3.07 days (95% CI: 1.61-4.54;  $p < 0.001$ ). WMD in hospital LOS was significantly higher  
21 in BSIs (4.41 days; 95% CI: 3.37-5.46;  $p < 0.001$ ) and non-invasive infections (2.19 days; 95%  
22 CI: 1.56-2.81;  $p < 0.001$ ). Subgroup analyses showed variation of estimates by study design,  
23 population, strain, and assessment of appropriateness of empiric treatment. High heterogeneity  
24 was observed in all analyses.

25 **Conclusions** Current evidence of the clinical burden of infections caused by ESBL-producing  
26 bacteria is highly heterogeneous and based mainly on unadjusted estimates derived from  
27 retrospective studies. Despite these limitations, ESBL production in strains causing BSIs seems  
28 associated with higher all-cause and attributable mortality and longer hospitalisation.

## 29 KEYWORDS

30 Extended-spectrum beta-lactamase, mortality, bloodstream infection, length of stay, meta-  
31 analysis, systematic review  
32

## 1 STRENGTHS AND LIMITATIONS OF THIS STUDY

- 2 ▶ Evidence of the impact of ESBL production on mortality and length of stay in strains
- 3 causing invasive and non-invasive infections was collected systematically.
- 4 ▶ Effect of multiple epidemiological and clinical variables was assessed in the calculation of
- 5 estimates.
- 6 ▶ Heterogeneity among studies was assessed.
- 7 ▶ Only few studies had been performed in high-risk populations or low-income countries.

For peer review only

## 1 INTRODUCTION

2 Infections caused by extended-spectrum beta-lactamase (ESBL)-producing  
3 *Enterobacteriaceae* are responsible for high morbidity and mortality worldwide.<sup>1,2,3</sup> The 2018  
4 World Health Organization list of antibiotic-resistant pathogens identified mortality as the most  
5 important criteria to prioritise bacteria for research and development of new, effective  
6 antibiotics.<sup>1</sup> In this prioritisation exercise, ESBL-producing *Enterobacteriaceae* were  
7 designated a critical priority because of their high all-cause mortality and high prevalence  
8 globally in healthcare-associated and community-acquired infections. The incidence and  
9 attributable mortality of multidrug-resistant bacterial infections, including ESBL-producing  
10 *Enterobacteriaceae*, in European countries has been recently estimated using a modelling  
11 analysis.<sup>4</sup> In 2015 ESBL-producing *Escherichia coli* was responsible for almost 300,000  
12 infections in Europe and 9,000 attributable deaths, and ESBL-producing *Klebsiella pneumoniae*  
13 caused around 70,000 infections and more than 3,500 deaths. The major limitation of this  
14 analysis is the sparseness of evidence on mortality due to ESBL-producing bacteria, which was  
15 limited largely to studies conducted in high-income countries.

16 Two systematic reviews have been performed to define the impact of ESBL production on  
17 mortality due to *Enterobacteriaceae*.<sup>2,3</sup> Both meta-analyses included studies targeting  
18 bloodstream infections (BSIs) and showed doubling all-cause mortality for ESBL-associated  
19 bacteraemia compared to non-ESBL *Enterobacteriaceae* bacteraemia. A major drawback of the  
20 analyses, highlighted by the authors, was the lack of control for confounding and limited  
21 adjustment for empiric therapy. No systematic review has been performed to assess attributable  
22 mortality and other indicators of clinical impact such as length of stay (LOS).

23 Because estimates of clinical burden drive policy design for antibiotic stewardship and infection  
24 control interventions, precise and current estimates are essential. The objective of this  
25 systematic review and meta-analysis was to assess the variation of effect estimates in the  
26 analysis of mortality and LOS in patients with infections due to ESBL-producing  
27 *Enterobacteriaceae*.

## 28 METHODS

### 29 Literature search strategy

30 The search was performed by 2 researchers (BPG and PS) in PubMed on 05 October 2018 using  
31 search terms (supplementary table S1) relevant to the following combinations: (ESBL AND  
32 *Escherichia coli* AND mortality) OR (ESBL AND *Klebsiella pneumoniae* AND mortality) OR  
33 (ESBL AND *Escherichia coli* AND length of stay OR length of hospitalisation) OR (ESBL

1 AND *Klebsiella pneumoniae* AND length of stay OR length of hospitalisation). Reference lists  
2 of retrieved articles were also searched.

### 3 **Eligibility criteria**

4 We included all clinical studies with a comparison group assessing all-cause mortality,  
5 attributable mortality, and overall LOS and intensive care unit stay (ICU) LOS in hospitalised  
6 patients with ESBL infections. Studies published from 1 January 1960 to 1 October 2018  
7 irrespective of the clinical setting and study design were included. No language restriction has  
8 been applied. Diagnostic studies, reviews, case reports, non-clinical studies, and abstracts of  
9 conference presentations were not included.

### 10 **Data extraction**

11 Two reviewers (PS and BPG) independently assessed the eligibility of trials and extracted data.  
12 In case of disagreement, a third reviewer (DL) was consulted. Extracted data were collected in  
13 an electronic worksheet, using EpiInfo 7.1: authors, journal, country, year of publication, year  
14 of study, time of data collection, study design, comparison group, study setting, population,  
15 aetiology, type and site of infection, and raw data related to mortality and LOS/ICU-LOS.  
16 Countries were classified as high-, middle-, or low-income using the World Bank Atlas  
17 method.<sup>5</sup> Adjusted effect estimates such as odds ratios (ORs) or hazard ratios and quality  
18 indicators such as reporting of antibiotic therapy, appropriateness of empirical treatment,  
19 resistance mechanisms, and minimum inhibitory concentrations (MICs) were also extracted.  
20 Mortality data were extracted as all-cause mortality or attributable mortality as defined in the  
21 studies. Where available, prespecified time periods for mortality assessment (i.e., 14 days, 28  
22 days, in-hospital) were also extracted. LOS and ICU-LOS were extracted as days with mean  
23 and standard deviation or median and interquartile range.

### 24 **Data analysis**

25 The primary outcomes for the clinical impact of ESBL infections were RRs of all-cause and  
26 attributable mortality and the weighted mean difference (WMD) in LOS and ICU-LOS in  
27 patients with ESBL infections compared with those in patients with non-ESBL infections and,  
28 where available, with uninfected patients. The impact of ESBL production on attributable and  
29 all-cause mortality was calculated with random effect meta-analysis and expressed as RR with  
30 95% confidence interval (CI). WMD in days with 95% CI was calculated to express the excess  
31 in LOS and ICU-LOS.

1  
2  
3 1 Variation of the effect estimate was assessed by grouping the studies according to the following  
4  
5 2 study/outcome characteristics: mortality time assessment (7 vs 14 days), aetiology (*E. coli* vs  
6  
7 3 *K. pneumoniae*), clinical setting (paediatric, oncology, ICU), economic country areas (high-  
8  
9 4 income countries [HICs] vs low- and medium-income countries [LMICs]), study design,  
10  
11 5 assessment of empiric therapy, and year. The source of infection was assessed and analysis of  
12  
13 6 mortality focused on BSIs while LOS was determined for BSIs and non-invasive infections  
14  
15 7 (i.e., urinary tract infections, respiratory tract infections, surgical site infection) due to limited  
16  
17 8 reporting.

17  
18 9 Subgroup analysis was computed only if more than 2 studies were available for each group.  
19  
20 10 Heterogeneity was evaluated by using  $I^2$  statistics and metaregression. Overall significance  
21  
22 11 testing was carried out using Wald tests adjusted using the Bonferroni correction. The  
23  
24 12 unadjusted ORs were compared with the adjusted ORs to estimate the effect of adjustment.  
25  
26 13 Reporting and publication bias was presented in funnel plots (supplementary figure 1 and 2)  
27  
28 14 and tested by Egger's test. Statistical analyses were performed using Stata version 15. Risk of  
29  
30 15 bias was assessed independently by two authors (PS, DL) using the Newcastle - Ottawa  
31  
32 16 quality assessment scale for cohort studies.<sup>6</sup> Studies were classified as low, moderate, or  
33  
34 17 high quality according to AHRQ standards (supplementary table S2). All meta-analyses  
35  
36 18 were performed in accordance with the Cochrane Collaboration recommendations<sup>7</sup> and  
37  
38 19 reported according to the PRISMA statement.<sup>8</sup>

37 20 The protocol is available online.

39 21 ([https://im1-tuebingen.de/wp-](https://im1-tuebingen.de/wp-content/uploads/2019/03/ClinicalImpactAMR_SR_studyprotocol_2018.pdf)  
40  
41 22 [content/uploads/2019/03/ClinicalImpactAMR\\_SR\\_studyprotocol\\_2018.pdf](https://im1-tuebingen.de/wp-content/uploads/2019/03/ClinicalImpactAMR_SR_studyprotocol_2018.pdf))

### 43 23 **Patient and Public Involvement**

45 24 There was no patient or public involvement in this systematic review of published literature.

### 47 25 **RESULTS**

50 26 Our literature search identified 1006 studies, and 92 (9.2%) met the eligibility criteria on the  
51  
52 27 basis of abstract screening. Full-text screening excluded an additional 5 articles, providing an  
53  
54 28 evidence base of 87 studies (Figure 1).<sup>9-95</sup> The 87 studies included in the qualitative analysis  
55  
56 29 were conducted between 1991 and 2017 in 25 countries, mainly in South Korea (14 studies),  
57  
58 30 Thailand (7), USA (7), Taiwan (7), and Spain (7). Sixty (68.9%) studies were performed in  
59  
60 31 HICs, 26 (29.9%) in LMICs, and 1 included both HICs and LMICs.<sup>55</sup> About half (44, 50.6%)  
32 32 were retrospective cohort studies, 24 (27.6%) case cohort studies, and 18 (20.7%) prospective

1 cohort studies; 1 study had an interventional design.<sup>56</sup> The comparison group was patients with  
2 infections caused by gram-negative non-ESBL producers in 82 (94.3%) studies, non-infected  
3 patients in 2 (2.3%), and both control groups in 3 (3.5%). Most (57, 65.5%) studies included  
4 data from the entire hospital, while a few focused on specific settings, mainly ICUs (9, 10.3%)  
5 and paediatric wards (8, 9.2%). The most common ESBL-producing bacteria were *E. coli* (23,  
6 26.4%) and *K. pneumoniae* (17, 19.5%). An overview of study characteristics is provided in  
7 online supplementary table S3.

8 Because data in 3 studies<sup>21,60,86</sup> were insufficient for quantitative analysis, 84 (96.6%) studies  
9 were included in the meta-analysis analysing data from 22,030 patients and 149 outcome  
10 measures. Fifty-seven studies analysed BSIs and 10 non-invasive infections. Study  
11 characteristics for all studies are provided in online supplementary table S4. 49 (58.3%) studies  
12 were of high quality, 23 (27.3%) were of moderate quality, and 12 (14.3%) were of low quality  
13 (supplementary table S5).

#### 14 **All-cause mortality**

15 All-cause mortality was reported in 81 studies including 21,942 patients (56 on BSIs and 7 on  
16 non-invasive infections). ESBL production in patients with BSIs increased all-cause mortality  
17 by a factor of 1.70 (95% CI: 1.52-1.90;  $p<0.001$ ;  $I^2=45.3%$ ;  $p<0.001$ ). The RR increased over  
18 time from 1.56 (95% CI: 1.15-2.11;  $p=0.004$ ) in 1991-1999 to 1.74 (95% CI: 1.50-2.01;  
19  $p<0.001$ ) in 2000-2009, and it was stable in 2010-2018 (1.72, 95% CI: 1.39-2.13;  $p<0.001$ ).  
20 The RR was higher in studies assessing appropriateness of empiric therapy (RR=1.75; 95% CI  
21 1.54-1.99;  $p<0.001$ ) than in those that did not (RR=1.55; 95% CI 1.26-1.90;  $p<0.001$ ). The  
22 subgroup analysis by pathogen showed that ESBL production increased the RR in BSIs due to  
23 *E. coli* (RR=1.82; 95% CI: 1.50-2.21;  $p<0.001$ ) compared to those due to *K. pneumoniae*  
24 (RR=1.48; 95% CI: 1.17-1.87;  $p=0.001$ ). Stratification by population age showed a higher RR  
25 in paediatric population (RR=2.09; 95% CI: 1.62-2.71;  $p<0.001$ ). Effect estimates did not vary  
26 significantly by study country, mortality time assessment (14 vs 28 days), ESBL molecular  
27 resistance mechanisms, or study design (Figure 2 and online supplementary figure 3). Adjusted  
28 estimates for inappropriate empirical antibiotic therapy were provided for 14 studies. The  
29 pooled unadjusted OR for all-cause mortality was 2.91 (95% CI: 2.23-3.81;  $p<0.001$ ,  $I^2=27.1%$ ;  
30  $p=0.164$ ) and the pooled OR after adjusting for receipt of appropriate empirical treatment was  
31 3.22 (95% CI: 1.53-6.76;  $p=0.002$ ;  $I^2=87.5%$ ;  $p<0.001$ ).

32 Studies with non-invasive infections reported a RR of 1.58 (95% CI: 1.23-2.02;  $p<0.001$ )  
33 (supplementary figure 4).

## 1 **Attributable mortality**

2 Attributable mortality was analysed in 16 studies including 2,885 patients. All studies were  
3 performed in HICs. ESBL production in patients with BSIs increased the risk of attributable  
4 mortality by a factor of 1.75 (95% CI: 1.45-2.11;  $p<0.001$ ;  $I^2=0\%$ ;  $p<0.001$ ). The RR increased  
5 over time from 1.53 (95% CI: 1.10-2.12;  $p=0.011$ ) in 1991-1999 to 1.91 (95% CI: 1.43-2.54;  
6  $p<0.001$ ) in 2000-2009 (Figure 3). Pathogen-specific RR for attributable mortality was 1.60  
7 (95% CI: 1.18-2.15;  $p=0.002$ ) for *K. pneumoniae* and 1.76 (95% CI: 1.33-2.34;  $p<0.001$ ) when  
8 the gram-negative organisms were analysed all together without species differentiation. The  
9 subgroup analysis showed the RR was lower in case cohort studies (1.56; 95% CI: 1.09-2.25;  
10  $p=0.016$ ) than in cohort studies (1.80; 95% CI: 1.37-2.37;  $p<0.001$ ).

## 11 **Length of stay**

12 LOS data were provided in 37 studies (17 on BSIs and 8 on non-invasive infections) analysing  
13 38 outcome measures. The WMD of LOS in patients with BSIs was 4.41 days (95% CI: 3.37-  
14 5.46;  $p<0.001$ ) and decreased from 5.72 days (95% CI: 2.69-8.75;  $p<0.001$ ) in 1991-1999 to  
15 4.22 days (95% CI: 3.02-5.43;  $p<0.001$ ) in 2000-2009 and was stable up to 2018 (4.30 days;  
16 95% CI: 1.38-7.22;  $p=0.004$ ). Higher WMD ( $p<0.001$ ) was observed for BSIs due to *K.*  
17 *pneumoniae* (7.67 days; 4.63-10.71) than for those due to *E. coli* (6.07 days; 95% CI 3.71-8.43).  
18 Retrospective cohort studies reported higher ( $p<0.001$ ) WMD (6.43 days; 95% CI: 4.66-8.21;  
19  $p<0.001$ ) than case cohort studies (3.32 days; 95% CI: 2.03-4.61). Studies in HICs showed  
20 higher WMD (4.56 days; 95% CI 3.43-5.70;  $p<0.001$ ) than studies in LMICs (3.55 days; 95%  
21 CI 0.84-6.26;  $p=0.01$ ) (Figure 4).

22 Studies with non-invasive infections reported a WMD of 2.19 days (95% CI: 1.56-2.81;  
23  $p<0.001$ ), which decreased from 7.66 (95% CI: 5.83-9.46;  $p<0.001$ ) in 2000-2009 to 1.44 (95%  
24 CI: 0.77-2.10;  $p<0.001$ ) in 2010-2018 (online supplementary figure 5).

25 The data on ICU-LOS were provided in 7 studies and showed that BSIs caused by ESBL  
26 producers had a WMD of LOS of 3.07 days (95% CI: 1.61-4.54;  $p<0.001$ ).

27 Heterogeneity of the studied effect-modifiers did not reach statistical significance when  
28 assessed by metaregression (supplementary table S6).

29 Sensitivity analysis based on the quality of studies revealed no notable difference in the effect  
30 estimates after exclusion of low-quality studies (data not shown). Egger's test and the funnel  
31 plots (online supplementary figure 1 and 2) showed evidence for small study effects ( $p<0.001$ )  
32 and publication bias.



## 1 DISCUSSION

2 This systematic review shows that ESBL production has a significant impact on the most  
3 relevant patient-related clinical outcomes. In the subgroup analyses, all-cause mortality,  
4 attributable mortality, and LOS both in hospital and in ICU were higher for patients with BSIs  
5 due to ESBL-producing *Enterobacteriaceae* than for patients with BSIs due to non-ESBL-  
6 producing strains. Non-invasive infections caused by ESBL-producing strains were associated  
7 with higher all-cause mortality and prolonged LOS. Within the limitation of the low number of  
8 studies evaluating specific patient populations, paediatric and cancer patients seemed to suffer  
9 a higher impact of ESBL invasive infections than the overall population. Stratifying by  
10 pathogen type, the impact of ESBL production was higher for *E. coli* BSIs than for *K.*  
11 *pneumoniae* BSIs. No relevant differences in mortality analysis emerged with stratification by  
12 study design or country income level. Impact of ESBL infections on mortality became more  
13 evident in more recent studies. Studies reporting on appropriateness of empirical therapy, ESBL  
14 resistance mechanisms, and MICs showed a higher clinical impact of ESBL infections than  
15 studies not assessing these variables. In particular, pooled ORs adjusted for inappropriate  
16 empirical treatment, showed a remarkably higher OR for mortality in patients with ESBL  
17 infections.

18 Our findings confirm the results of previous systematic reviews. Schwaber et al. performed a  
19 systematic review comparing mortality in ESBL BSIs and non-ESBL BSIs in studies published  
20 through 2003.<sup>2</sup> The authors show a pooled RR for all-cause mortality of 1.85 but, in contrast to  
21 our study, they combined *E. coli*, *Klebsiella* spp., and *Proteus* spp. in the analysis because of  
22 sample size limitations. Rottier et al. analysed studies published through 2010 and adjusting  
23 results for inappropriate empirical treatment found an adjusted OR of 1.37.<sup>3</sup> Our study, adding  
24 more than 50 studies in 17 years to the Rottier systematic review, confirmed the clinical  
25 importance of ESBL production to all-cause mortality and for the first time assessed the role of  
26 ESBL production on attributable mortality. We addressed relevant effect-modifiers through  
27 subgroup analyses and found that population, pathogen, and assessment of empiric therapy all  
28 had an impact on estimates. Because we believe that appropriate empirical treatment plays a  
29 relevant role in invasive infections, we performed a secondary analysis by pooling only adjusted  
30 ORs and confirming the significant impact of antibiotic resistance as already shown in a  
31 previously published systematic review.<sup>96</sup> The lack of consideration of appropriateness of  
32 therapy in the studies evaluating mortality seems to underestimate the risk of ESBL production  
33 on mortality. However, studies assessing the impact of appropriate therapy did not provide

1  
2  
3 1 homogeneous definition and could refer either to empirical or definite therapy or a single  
4  
5 2 component irrespective of the dosage, making results difficult to interpret. The impact of ESBL  
6  
7 3 production on LOS has been also estimated, assessing BSIs and non-invasive infections  
8  
9 4 separately and confirming the prolongation of hospitalisation.

10  
11 5 Our systematic review contributes to the discussion on the limitation of current evidence for  
12  
13 6 the estimation of mortality due to antibiotic-resistant infections. Our finding underlines the  
14  
15 7 importance of considering a multivariable model with a whole set of determinants when trying  
16  
17 8 to quantify the impact of resistance on clinical outcomes. The source of infection, for example,  
18  
19 9 can influence the role of empirical treatment on the clinical outcome. For example, patients  
20  
21 10 with UTI receiving inappropriate empirical antibiotic therapy can potentially show a favourable  
22  
23 11 outcome, most probably due to the high concentration of antibiotic reached in the urinary  
24  
25 12 tract.<sup>97</sup>

26  
27 13 Our study has some limitations. Although results of the meta-analyses were significant in all  
28  
29 14 the subgroups, we could analyse only a limited number of studies providing information for  
30  
31 15 subgroups such as haematological patients and low-income countries, making generalizability  
32  
33 16 of results less certain for these specific patient populations. Only a few studies reported MIC  
34  
35 17 data or specific ESBL molecular resistant phenotype (i.e., AmpC). Moreover, publication bias  
36  
37 18 was detected in both the main analyses (all-cause mortality and LOS), thus implying the  
38  
39 19 possibility that results from small studies with non-significant results might have been  
40  
41 20 conducted and not published, resulting in a possible overestimation of our results. The non-  
42  
43 21 homogeneous reporting of some relevant data in published literature (e.g., disease severity,  
44  
45 22 underlying comorbidities and resistance mechanism) may also have affected the precision of  
46  
47 23 the estimate. Patients with ESBL are intrinsically at higher risk of mortality and complications  
48  
49 24 because they are often older, have more comorbidities or higher antibiotic exposure, and are at  
50  
51 25 higher risk of receiving inappropriate empirical treatment.<sup>98</sup> Finally, due to resource constraints,  
52  
53 26 we had to limit our search to PubMed database with the chance of missing relevant studies.

54  
55 27 In summary, our systematic review emphasises the importance of suspicion and confirmation  
56  
57 28 of ESBL production as soon as possible for invasive infections and demonstrates that ESBL  
58  
59 29 production increases the risk of attributable mortality and LOS in both hospital and ICU for  
60  
30 invasive and non-invasive infections. Patients with ESBL infections remain at higher risk of  
31  
32 mortality and prolonged LOS even after adjustment for empiric inappropriate treatment.  
33  
34 Control for other relevant effect-modifiers is hindered by the sparseness of published data.  
35  
36 Future studies addressing the clinical burden of drug-resistant infections must include ESBL

1  
2  
3 1 production and should assess both the impact of molecular mechanisms of resistance and effect  
4 2 on specific patient populations such as haematological patients and those in LMIC.

5  
6  
7 3 **Acknowledgements** We thank Anne McDonough, a professional medical writer who provided  
8 4 medical writing support funded by the authors.

9  
10  
11 5 **Author Contributions** ET contributed to the study concept. BPG and PS performed data  
12 6 analysis. PS and AC extracted data and wrote the first draft of the manuscript. DL contributed  
13 7 to the first draft of the manuscript. EC and ET wrote the final version of the manuscript. CB  
14 8 reviewed the paper. All authors read, edited, and approved the final manuscript. The  
15 9 corresponding author had full access to all the data in the study and had final responsibility for  
16 10 the decision to submit for publication.

17  
18  
19  
20  
21 11 **Funding** This work was supported by the German Center for Infection Research Clinical  
22 12 Research Unit for Health-Care Associated Infections grant number TTU 08.701 and DRIVE-  
23 13 AB (115618). The funder had no involvement in the study design; in the collection, analysis  
24 14 and interpretation of the data; in the writing of the report; or in the decision to submit the paper  
25 15 for publication.

26  
27  
28  
29  
30 16 **Competing interests** The authors report no competing interests.

31  
32 17 **Patient consent** Not required

33  
34 18 **Provenance and peer review** Not commissioned; externally peer reviewed.

35  
36 19 **Data sharing statement** Requests for data should be addressed to the corresponding author.

37  
38  
39 21 **Open access** This is an open access article distributed in accordance with the Creative  
40 22 Commons Attribution Non Commercial (CC BY-NC 4.0) license, which permits others to  
41 23 distribute, remix, adapt, build upon this work non-commercially, and license their derivative  
42 24 works on different terms, provided the original work is properly cited, appropriate credit is  
43 25 given, any changes made indicated, and the use is non-commercial. See: [http://](http://creativecommons.org/licenses/by-nc/4.0/)  
44 26 [creativecommons.org/licenses/by-nc/4.0/](http://creativecommons.org/licenses/by-nc/4.0/).

45  
46  
47  
48  
49 27  
50  
51  
52  
53  
54  
55  
56  
57  
58  
59  
60

## 1 REFERENCES

- 1 1. Tacconelli E, Carrara E, Savoldi A, et al. Discovery, research, and development of new  
2 antibiotics: the WHO priority list of antibiotic-resistant bacteria and tuberculosis. *Lancet*  
3 *Infect Dis* 2018;18:318–27.
- 4 2. Schwaber MJ, Carmeli Y. Mortality and delay in effective therapy associated with  
5 extended-spectrum beta-lactamase production in Enterobacteriaceae bacteraemia: a  
6 systematic review and meta-analysis. *J Antimicrob Chemother* 2007;60:913–20.
- 7 3. Rottier WC, Ammerlaan HS, Bonten MJ. Effects of confounders and intermediates on the  
8 association of bacteraemia caused by extended-spectrum beta-lactamase-producing  
9 Enterobacteriaceae and patient outcome: a meta-analysis. *J Antimicrob Chemother*  
10 2012;67:1311–20.
- 11 4. Cassini A, Högberg LD, Plachouras D, et al; Attributable deaths and disability-adjusted  
12 life-years caused by infections with antibiotic-resistant bacteria in the EU and the European  
13 Economic Area in 2015: a population-level modelling analysis. *Lancet Infect Dis*  
14 2019;19:56–66.
- 15 5. The World Bank. What is the World Bank Atlas method?  
16 [https://datahelpdesk.worldbank.org/knowledgebase/articles/77933-what-is-the-world-](https://datahelpdesk.worldbank.org/knowledgebase/articles/77933-what-is-the-world-bank-atlas-method)  
17 [bank-atlas-method](https://datahelpdesk.worldbank.org/knowledgebase/articles/77933-what-is-the-world-bank-atlas-method). Accessed January 14, 2019.
- 18 6. Wells GA, Shea B, O'Connell D, Peterson J, Welch V, Losos M *et al*. The Newcastle–  
19 Ottawa Scale (NOS) for assessing the quality of nonrandomized studies in meta-analyses.  
20 The Ottawa Health Research Institute: Ottawa, Canada.  
21 [http://www.ohri.ca/programs/clinical\\_epidemiology/oxford.htm](http://www.ohri.ca/programs/clinical_epidemiology/oxford.htm). Accessed April 14 2015
- 22 7. Higgins JPT, Green S (editors). *Cochrane Handbook for Systematic Reviews of*  
23 *Interventions* Version 5.1.0 [updated March 2011]. The Cochrane Collaboration, 2011.  
24 Available from <http://handbook.cochrane.org>.
- 25 8. Moher D, Liberati A, Tetzlaff J, et al. Preferred reporting items for systematic reviews and  
26 meta-analyses: the PRISMA statement. *BMJ* 2009;339:b2535.
- 27 9. Lautenbach E, Patel JB, Bilker WB, et al. Extended-spectrum beta-lactamase-producing  
28 *Escherichia coli* and *Klebsiella pneumoniae*: risk factors for infection and impact of  
29 resistance on outcomes. *Clin Infect Dis* 2001;32:1162–71.
- 30 10. Leistner R, Sakellariou C, Gurntke S, et al. Mortality and molecular epidemiology  
31 associated with extended-spectrum beta-lactamase production in *Escherichia coli* from  
32 bloodstream infection. *Infect Drug Resist* 2014;7:57–62.
- 33

- 1  
2  
3 1 11. Lin JN, Chen YH, Chang LL, et al. Clinical characteristics and outcomes of patients with  
4  
5 2 extended-spectrum beta-lactamase-producing bacteremias in the emergency department.  
6  
7 3 *Intern Emerg Med* 2011;6:547–55.
- 8  
9 4 12. Kim HJ, Park JH, Park DI, et al. Clinical impact of extended-spectrum beta-lactamase-  
10  
11 5 producing Enterobacteriaceae in patients with biliary tract infection. *Dig Dis Sci*  
12  
13 6 2013;58:841–9.
- 14  
15 7 13. Kim SH, Kwon JC, Choi SM, et al. Escherichia coli and Klebsiella pneumoniae bacteremia  
16  
17 8 in patients with neutropenic fever: factors associated with extended-spectrum beta-  
18  
19 9 lactamase production and its impact on outcome. *Ann Hematol* 2013;92:533–41.
- 20  
21 10 14. Pillay T, Pillay DG, Adhikari M, et al. Piperacillin/tazobactam in the treatment of Klebsiella  
22  
23 11 pneumoniae infections in neonates. *Am J Perinatol* 1998;15:47–51.
- 24  
25 12 15. Kim BN, Woo JH, Kim MN, et al. Clinical implications of extended-spectrum beta-  
26  
27 13 lactamase-producing Klebsiella pneumoniae bacteraemia. *J Hosp Infect* 2002;52:99–106.
- 28  
29 14 16. Kim YK, Pai H, Lee HJ, et al. Bloodstream infections by extended-spectrum beta-  
30  
31 15 lactamase-producing Escherichia coli and Klebsiella pneumoniae in children: epidemiology  
32  
33 16 and clinical outcome. *Antimicrob Agents Chemother* 2002;46:1481–91.
- 34  
35 17 17. Bhavnani SM, Ambrose PG, Craig WA, et al. Outcomes evaluation of patients with ESBL-  
36  
37 18 and non-ESBL-producing Escherichia coli and Klebsiella species as defined by CLSI  
38  
39 19 reference methods: report from the SENTRY Antimicrobial Surveillance Program. *Diagn*  
40  
41 20 *Microbiol Infect Dis* 2006;54:231–6.
- 42  
43 21 18. Blomberg B, Jureen R, Manji KP, et al. High rate of fatal cases of pediatric septicemia  
44  
45 22 caused by gram-negative bacteria with extended-spectrum beta-lactamases in Dar es  
46  
47 23 Salaam, Tanzania. *J Clin Microbiol* 2005;43:745–9.
- 48  
49 24 19. Panhotra BR, Saxena AK, Al-Ghamdi AM. Extended-spectrum beta-lactamase-producing  
50  
51 25 Klebsiella pneumoniae hospital acquired bacteremia. Risk factors and clinical outcome.  
52  
53 26 *Saudi Med J* 2004;25:1871–6.
- 54  
55 27 20. Marra AR, Wey SB, Castelo A, et al. Nosocomial bloodstream infections caused by  
56  
57 28 Klebsiella pneumoniae: impact of extended-spectrum beta-lactamase (ESBL) production  
58  
59 29 on clinical outcome in a hospital with high ESBL prevalence. *BMC Infect Dis* 2006;6:24.
- 60  
30 21. Skippen I, Shemko M, Turton J, et al. Epidemiology of infections caused by extended-  
31  
32 30 spectrum beta-lactamase-producing Escherichia coli and Klebsiella spp.: a nested case-  
control study from a tertiary hospital in London. *J Hosp Infect* 2006;64:115–23.

- 1  
2  
3 1 22. Schwaber MJ, Navon-Venezia S, Kaye KS, et al. Clinical and economic impact of  
4 bacteremia with extended-spectrum-beta-lactamase-producing Enterobacteriaceae.  
5 2  
6 *Antimicrob Agents Chemother* 2006;50:1257–62.  
7 3  
8  
9 4 23. Apisarnthanarak A, Kiratisin P, Saifon P, et al. Clinical and molecular epidemiology of  
10 5  
11 community-onset, extended-spectrum beta-lactamase-producing Escherichia coli infections  
12 6  
13 in Thailand: a case-case-control study. *Am J Infect Control* 2007;35:606–12.  
14 7  
15 24. Tumbarello M, Spanu T, Sanguinetti M, et al. Bloodstream infections caused by extended-  
16 8  
17 spectrum-beta-lactamase-producing Klebsiella pneumoniae: risk factors, molecular  
18 9  
19 10 25. Apisarnthanarak A, Kiratisin P, Saifon P, et al. Risk factors for and outcomes of healthcare-  
20 11  
21 associated infection due to extended-spectrum beta-lactamase-producing Escherichia coli  
22 12  
23 or Klebsiella pneumoniae in Thailand. *Infect Control Hosp Epidemiol* 2007;28:873–6. doi:  
24 13  
25 10.1086/518725  
26 14 26. Kanafani ZA, Mehio-Sibai A, Araj GF, et al. Epidemiology and risk factors for extended-  
27 15  
28 spectrum beta-lactamase-producing organisms: a case control study at a tertiary care center  
29 16  
30 in Lebanon. *Am J Infect Control* 2005;33:326–32.  
31 17 27. Zaoutis TE, Goyal M, Chu JH, et al. Risk factors for and outcomes of bloodstream infection  
32 18  
33 caused by extended-spectrum beta-lactamase-producing Escherichia coli and Klebsiella  
34 19  
35 species in children. *Pediatrics* 2005;115:942–9.  
36 20 28. Loh LC, Nor Izran Hanim Bt Abdul S, Rosdara Masayuni Bt Mohd S, et al. Hospital  
37 21  
38 Outcomes of Adult Respiratory Tract Infections with Extended-Spectrum B-Lactamase  
39 22  
40 (ESBL) Producing Klebsiella Pneumoniae. *Malays J Med Sci* 2007;14:36–40.  
41 23 29. Melzer M, Petersen I. Mortality following bacteraemic infection caused by extended  
42 24  
43 spectrum beta-lactamase (ESBL) producing E. coli compared to non-ESBL producing E.  
44 25  
45 coli. *J Infect* 2007;55:254–9. doi: 10.1016/j.jinf.2007.04.007  
46 26 30. Song KH, Jeon JH, Park WB, et al. Clinical outcomes of spontaneous bacterial peritonitis  
47 27  
48 due to extended-spectrum beta-lactamase-producing Escherichia coli and Klebsiella  
49 28  
50 species: a retrospective matched case-control study. *BMC Infect Dis* 2009;9:41.  
51 29 31. Bennett JW, Robertson JL, Hospenthal DR, et al. Impact of extended spectrum beta-  
52 30  
53 lactamase producing Klebsiella pneumoniae infections in severely burned patients. *J Am*  
54 31  
55 *Coll Surg* 2010;211:391–9.  
56 32 32. Trecarichi EM, Tumbarello M, Spanu T, et al. Incidence and clinical impact of extended-  
57 33  
58 spectrum-beta-lactamase (ESBL) production and fluoroquinolone resistance in bloodstream  
59  
60

- 1  
2  
3 1 infections caused by *Escherichia coli* in patients with hematological malignancies. *J Infect*  
4 2009;58:299–307.  
5 2  
6 33. Tuon FF, Kruger M, Terreri M, et al. *Klebsiella* ESBL bacteremia-mortality and risk  
7 3 factors. *Braz J Infect Dis* 2011;15:594–8.  
8 4  
9 34. Kang CI, Song JH, Chung DR, et al. Risk factors and treatment outcomes of community-  
10 5 onset bacteraemia caused by extended-spectrum beta-lactamase-producing *Escherichia*  
11 6 *coli*. *Int J Antimicrob Agents* 2010;36:284–7.  
12 7  
13 35. Pena C, Gudiol C, Calatayud L, et al. Infections due to *Escherichia coli* producing extended-  
14 8 spectrum beta-lactamase among hospitalised patients: factors influencing mortality. *J Hosp*  
15 9 *Infect* 2008;68:116–22.  
16 10  
17 36. Tumbarello M, Spanu T, Di Bidino R, et al. Costs of bloodstream infections caused by  
18 11 *Escherichia coli* and influence of extended-spectrum-beta-lactamase production and  
19 12 inadequate initial antibiotic therapy. *Antimicrob Agents Chemother* 2010;54:4085–91.  
20 13  
21 37. Kang CI, Chung DR, Ko KS, et al. Risk factors for infection and treatment outcome of  
22 14 extended-spectrum beta-lactamase-producing *Escherichia coli* and *Klebsiella pneumoniae*  
23 15 bacteremia in patients with hematologic malignancy. *Ann Hematol* 2012;91:115–21.  
24 16  
25 38. Wu YH, Chen PL, Hung YP, et al. Risk factors and clinical impact of levofloxacin or  
26 17 cefazolin nonsusceptibility or ESBL production among uropathogens in adults with  
27 18 community-onset urinary tract infections. *J Microbiol Immunol Infect* 2014;47:197–203.  
28 19  
29 39. Rodriguez-Bano J, Picon E, Gijon P, et al. Community-onset bacteremia due to extended-  
30 20 spectrum beta-lactamase-producing *Escherichia coli*: risk factors and prognosis. *Clin Infect*  
31 21 *Dis* 2010;50:40–8.  
32 22  
33 40. Gurntke S, Kohler C, Steinmetz I, et al. Molecular epidemiology of extended-spectrum  
34 23 beta-lactamase (ESBL)-positive *Klebsiella pneumoniae* from bloodstream infections and  
35 24 risk factors for mortality. *J Infect Chemother* 2014;20:817–9.  
36 25  
37 41. Oh MM, Chae JY, Kim JW, et al. Positive culture for extended-spectrum beta-lactamase  
38 26 during acute prostatitis after prostate biopsy is a risk factor for progression to chronic  
39 27 prostatitis. *Urology* 2013;81:1209–12.  
40 28  
41 42. Leistner R, Gurntke S, Sakellariou C, et al. Bloodstream infection due to extended-spectrum  
42 29 beta-lactamase (ESBL)-positive *K. pneumoniae* and *E. coli*: an analysis of the disease  
43 30 burden in a large cohort. *Infection* 2014;42:991–7.  
44 31  
45 43. Ku NS, Chung HS, Choi JY, et al. Clinical usefulness of the 2010 clinical and laboratory  
46 32 standards institute revised breakpoints for cephalosporin use in the treatment of bacteremia  
47 33 caused by *Escherichia coli* or *Klebsiella* spp. *Biomed Res Int* 2015;2015:831074.  
48 34  
49  
50  
51  
52  
53  
54  
55  
56  
57  
58  
59  
60

- 1 44. Anunnatsiri S, Towiwat P, Chaimanee P. Risk factors and clinical outcomes of extended  
2 spectrum beta-lactamase (ESBL)-producing *Escherichia coli* septicemia at Srinagarind  
3 University Hospital, Thailand. *Southeast Asian J Trop Med Public Health* 2012;43:1169–  
4 77.
- 5 45. Kang CI, Kim SH, Kim DM, et al. Risk factors for and clinical outcomes of bloodstream  
6 infections caused by extended-spectrum beta-lactamase-producing *Klebsiella pneumoniae*.  
7 *Infect Control Hosp Epidemiol* 2004;25:860–7.
- 8 46. Raviv Y, Shitrit D, Amital A, et al. Multidrug-resistant *Klebsiella pneumoniae* acquisition  
9 in lung transplant recipients. *Clin Transplant* 2012;26:E388–94.
- 10 47. MacVane SH, Tuttle LO, Nicolau DP. Impact of extended-spectrum beta-lactamase-  
11 producing organisms on clinical and economic outcomes in patients with urinary tract  
12 infection. *J Hosp Med* 2014;9:232–8.
- 13 48. Abhilash KP, Veeraraghavan B, Abraham OC. Epidemiology and outcome of bacteremia  
14 caused by extended spectrum beta-lactamase (ESBL)-producing *Escherichia coli* and  
15 *Klebsiella spp.* in a tertiary care teaching hospital in south India. *J Assoc Physicians India*  
16 2010;58 Suppl:13-7.
- 17 49. Shanthi M, Sekar U. Extended spectrum beta lactamase producing *Escherichia coli* and  
18 *Klebsiella pneumoniae*: risk factors for infection and impact of resistance on outcomes. *J*  
19 *Assoc Physicians India* 2010;58 Suppl:41–4.
- 20 50. Han SB, Jung SW, Bae EY, et al. Extended-spectrum beta-lactamase-producing *Escherichia*  
21 *coli* and *Klebsiella pneumoniae* bacteremia in febrile neutropenic children. *Microb Drug*  
22 *Resist* 2015;21:244–51.
- 23 51. Lee S, Song DY, Cho SH, et al. Impact of extended-spectrum beta-lactamase on acute  
24 pyelonephritis treated with empirical ceftriaxone. *Microb Drug Resist* 2014;20:39–44.
- 25 52. Chayakulkeeree M, Junsriwong P, Keerasuntonpong A, et al. Epidemiology of extended-  
26 spectrum beta-lactamase producing gram-negative bacilli at Siriraj Hospital, Thailand,  
27 2003. *Southeast Asian J Trop Med Public Health* 2005;36:1503–9.
- 28 53. Apisarnthanarak A, Kiratisin P, Mundy LM. Predictors of mortality from community-onset  
29 bloodstream infections due to extended-spectrum beta-lactamase-producing *Escherichia*  
30 *coli* and *Klebsiella pneumoniae*. *Infect Control Hosp Epidemiol* 2008;29:671–4.
- 31 54. Apisarnthanarak A, Kiratisin P, Saifon P, et al. Predictors of mortality among patients with  
32 community-onset infection due to extended-spectrum beta-lactamase-producing  
33 *Escherichia coli* in Thailand. *Infect Control Hosp Epidemiol* 2008;29:80–2.



- 1  
2  
3 1 55. Jean SS, Ko WC, Xie Y, et al. Clinical characteristics of patients with community-acquired  
4 2 complicated intra-abdominal infections: a prospective, multicentre, observational study. *Int*  
5 3 *J Antimicrob Agents* 2014;44:222–8.  
6 4  
7 56. Lee J, Pai H, Kim YK, et al. Control of extended-spectrum beta-lactamase-producing  
8 5 Escherichia coli and Klebsiella pneumoniae in a children's hospital by changing  
9 6 antimicrobial agent usage policy. *J Antimicrob Chemother* 2007;60:629–37.  
10 7  
11 57. Briongos-Figuero LS, Gomez-Traveso T, Bachiller-Luque P, et al. Epidemiology, risk  
12 8 factors and comorbidity for urinary tract infections caused by extended-spectrum beta-  
13 9 lactamase (ESBL)-producing enterobacteria. *Int J Clin Pract* 2012;66:891–6.  
14 10  
15 58. Ha YE, Kang CI, Cha MK, et al. Epidemiology and clinical outcomes of bloodstream  
16 11 infections caused by extended-spectrum beta-lactamase-producing Escherichia coli in  
17 12 patients with cancer. *Int J Antimicrob Agents* 2013;42:403–9.  
18 13  
19 59. Du B, Long Y, Liu H, et al. Extended-spectrum beta-lactamase-producing Escherichia coli  
20 14 and Klebsiella pneumoniae bloodstream infection: risk factors and clinical outcome.  
21 15 *Intensive Care Med* 2002;28:1718–23.  
22 16  
23 60. Stone PW, Gupta A, Loughrey M, et al. Attributable costs and length of stay of an extended-  
24 17 spectrum beta-lactamase-producing Klebsiella pneumoniae outbreak in a neonatal intensive  
25 18 care unit. *Infect Control Hosp Epidemiol* 2003;24:601–6.  
26 19  
27 61. Pena C, Pujol M, Ardanuy C, et al. An outbreak of hospital-acquired Klebsiella pneumoniae  
28 20 bacteraemia, including strains producing extended-spectrum beta-lactamase. *J Hosp Infect*  
29 21 2001;47:53–9.  
30 22  
31 62. Kola A, Maciejewski O, Sohr D, et al. Clinical impact of infections caused by ESBL-  
32 23 producing E. coli and K. pneumoniae. *Scand J Infect Dis* 2007;39:975–82.  
33 24  
34 63. Tsai MH, Lee IT, Chu SM, et al. Clinical and Molecular Characteristics of Neonatal  
35 25 Extended-Spectrum beta-Lactamase-Producing Gram-Negative Bacteremia: A 12-Year  
36 26 Case-Control-Control Study of a Referral Center in Taiwan. *PLoS One*  
37 27 2016;11(8):e0159744.  
38 28  
39 64. Maslikowska JA, Walker SA, Elligsen M, et al. Impact of infection with extended-spectrum  
40 29 beta-lactamase-producing Escherichia coli or Klebsiella species on outcome and  
41 30 hospitalization costs. *J Hosp Infect* 2016;92:33–41.  
42 31  
43 65. Onken A, Said AK, Jorstad M, et al. Prevalence and antimicrobial resistance of microbes  
44 32 causing bloodstream infections in Unguja, Zanzibar. *PLoS One* 2015;10:e0145632.  
45 33  
46 66. Nguyen ML, Toye B, Kanji S, et al. Risk factors for and outcomes of bacteremia caused by  
47 34 extended-spectrum  $\beta$ -lactamase-producing Escherichia coli and Klebsiella species at a

- 1  
2  
3 1 Canadian tertiary care hospital. *Can J Hosp Pharm* 2015;68(2):136–43. [published Online  
4 First: 2015/05/13]  
5 2  
6 3 67. Denis B, Lafaurie M, Donay JL, et al. Prevalence, risk factors, and impact on clinical  
7 4 outcome of extended-spectrum beta-lactamase-producing *Escherichia coli* bacteraemia: a  
8 5 five-year study. *Int J Infect Dis* 2015;39:1–6.  
9 6  
10 68. Chopra T, Marchaim D, Johnson PC, et al. Risk factors for bloodstream infection caused  
11 7 by extended-spectrum beta-lactamase-producing *Escherichia coli* and *Klebsiella*  
12 8 pneumoniae: A focus on antimicrobials including cefepime. *Am J Infect Control*  
13 9 2015;43:719–23.  
14 10  
15 69. Artero A, Esparcia A, Alberola J, et al. Prospective cohort study of risk factors for extended-  
16 11 spectrum ss-lactamase-producing *Escherichia coli* urinary tract infections in elderly patients  
17 12 admitted to hospital. *Int J Clin Pract* 2017;71:doi:10.1111/ijcp.13001  
18 13  
19 70. Chen IL, Huang HC, Wu CT, et al. Analysis of early-onset bloodstream infection due to  
20 14 *Escherichia coli* infection in premature babies. *Medicine* 2017;96:e7748.  
21 15  
22 71. Islas-Munoz B, Volkow-Fernandez P, Ibanes-Gutierrez C, et al. Bloodstream infections in  
23 16 cancer patients. Risk factors associated with mortality. *Int J Infect Dis* 2018;71:59–64.  
24 17  
25 72. Ma J, Li N, Liu Y, et al. Antimicrobial resistance patterns, clinical features, and risk factors  
26 18 for septic shock and death of nosocomial *E coli* bacteremia in adult patients with  
27 19 hematological disease: A monocenter retrospective study in China. *Medicine*  
28 20 2017;96:e6959.  
29 21  
30 73. Man MY, Shum HP, Chan YH, et al. Clinical predictors and outcomes of *Klebsiella*  
31 22 pneumoniae bacteraemia in a regional hospital in Hong Kong. *J Hosp Infect* 2017;97:35–  
32 23 41.  
33 24  
34 74. Marando R, Seni J, Mirambo MM, et al. Predictors of the extended-spectrum-beta  
35 25 lactamases producing Enterobacteriaceae neonatal sepsis at a tertiary hospital, Tanzania.  
36 26 *Int J Med Microbiol* 2018;308:803–11.  
37 27  
38 75. Namikawa H, Yamada K, Fujimoto H, et al. Clinical characteristics of bacteremia caused  
39 28 by extended-spectrum beta-lactamase-producing *Escherichia coli* at a tertiary hospital.  
40 29 *Intern Med* 2017;56:1807–15.  
41 30  
42 76. Shi SH, Feng XN, Lai MC, et al. Biliary diseases as main causes of pyogenic liver abscess  
43 31 caused by extended-spectrum beta-lactamase-producing Enterobacteriaceae. *Liver Int*  
44 32 2017;37:727–34.  
45  
46  
47  
48  
49  
50  
51  
52  
53  
54  
55  
56  
57  
58  
59  
60

- 1  
2  
3 1 77. Tanir Basaranoglu S, Ozsurekci Y, Aykac K, et al. A comparison of blood stream infections  
4 with extended spectrum beta-lactamase-producing and non-producing *Klebsiella*  
5 2 pneumoniae in pediatric patients. *Ital J Pediat* 2017;43:79.  
6 3  
7 8  
8 4 78. Razazi K, Mekontso Dessap A, Carteaux G, et al. Frequency, associated factors and  
9 outcome of multi-drug-resistant intensive care unit-acquired pneumonia among patients  
10 5 colonized with extended-spectrum beta-lactamase-producing Enterobacteriaceae. *Ann*  
11 6 *Intensive Care* 2017;7:61.  
12 7  
13 8  
14 8 79. Ray S, Anand D, Purwar S, et al. Association of high mortality with extended-spectrum  
15 9 beta-lactamase (ESBL) positive cultures in community acquired infections. *J Crit Care*  
16 10 2018;44:255–60.  
17 9  
18 10  
19 11 80. Haruki Y, Hagiya H, Haruki M, et al. Clinical characteristics and outcome of critically ill  
20 12 patients with bacteremia caused by extended-spectrum beta-lactamase-producing and non-  
21 13 producing *Escherichia coli*. *J Infect Chemother* 2018;24:944–7.  
22 12  
23 13  
24 14 81. Lin WT, Tang HJ, Lai CC, et al. Clinical manifestations and bacteriological features of  
25 15 culture-proven Gram-negative bacterial arthritis. *J Microbiol Immunol Infect* 2017;50:527–  
26 16 31.  
27 15  
28 16  
29 17 82. Buys H, Muloiwa R, Bamford C, et al. *Klebsiella pneumoniae* bloodstream infections at a  
30 18 South African children's hospital 2006-2011, a cross-sectional study. *BMC Infect Dis*  
31 19 2016;16:570.  
32 18  
33 19  
34 20 83. Lee CC, Lee CH, Hong MY, et al. Propensity-matched analysis of the impact of extended-  
35 21 spectrum beta-lactamase production on adults with community-onset *Escherichia coli*,  
36 22 *Klebsiella* species, and *Proteus mirabilis* bacteremia. *J Microbiol Immunol Infect*  
37 23 2018;51:519–26.  
38 21  
39 22  
40 23  
41 24 84. Huang YY, Alleyne A, Leung V, et al. Urosepsis due to extended-spectrum beta-lactamase-  
42 25 producing *Escherichia coli*: a retrospective, single-centre review of risk factors and clinical  
43 26 outcomes. *Can J Hosp Pharm* 2018;71:119-27.  
44 25  
45 26  
46 27 85. Komatsu Y, Kasahara K, Inoue T, et al. Molecular epidemiology and clinical features of  
47 28 extended-spectrum beta-lactamase- or carbapenemase-producing *Escherichia coli*  
48 29 bacteremia in Japan. *PLoS One* 2018;13:e0202276.  
49 28  
50 29  
51 30 86. Liu M, Li M, Wu L, et al. Extended-spectrum beta-lactamase-producing *E. coli* septicemia  
52 31 among rectal carriers in the ICU. *Medicine* 2018;97:e12445.  
53 30  
54 31  
55 32 87. Nivesvivat T, Piyaraj P, Thunyaharn S, et al. Clinical epidemiology, risk factors and  
56 33 treatment outcomes of extended-spectrum beta-lactamase producing Enterobacteriaceae  
57 32  
58 33  
59  
60

- 1  
2  
3 1 bacteremia among children in a tertiary care hospital, Bangkok, Thailand. *BMC Res Notes*  
4 2018;11:624.  
5 2  
6 3  
7 3 88. Cordery RJ, Roberts CH, Cooper SJ, et al. Evaluation of risk factors for the acquisition of  
8 4 bloodstream infections with extended-spectrum beta-lactamase-producing *Escherichia coli*  
9 5 and *Klebsiella* species in the intensive care unit; antibiotic management and clinical  
10 6 outcome. *J Hosp Infect* 2008;68:108–15.  
11 7  
12 8 89. Daikos GL, Kosmidis C, Tassios PT, et al. Enterobacteriaceae bloodstream infections:  
13 9 presence of integrons, risk factors, and outcome. *Antimicrob Agents Chemother*  
14 10 2007;51:2366–72. doi: 10.1128/AAC.00044-07 [published Online First: 2007/04/25]  
15 11  
16 12 90. Gudiol C, Calatayud L, Garcia-Vidal C, et al. Bacteraemia due to extended-spectrum beta-  
17 13 lactamase-producing *Escherichia coli* (ESBL-EC) in cancer patients: clinical features, risk  
18 14 factors, molecular epidemiology and outcome. *J Antimicrob Chemother* 2010;65(2):333–  
19 15 41.  
20 16  
21 17 91. Marchaim D, Gottesman T, Schwartz O, et al. National multicenter study of predictors and  
22 18 outcomes of bacteremia upon hospital admission caused by Enterobacteriaceae producing  
23 19 extended-spectrum beta-lactamases. *Antimicrob Agents Chemother* 2010;54:5099–104.  
24 20  
25 21 92. Menashe G, Borer A, Yagupsky P, et al. Clinical significance and impact on mortality of  
26 22 extended-spectrum beta lactamase-producing Enterobacteriaceae isolates in nosocomial  
27 23 bacteremia. *Scand J Infect Dis* 2001;33:188–93.  
28 24  
29 25 93. Ortega M, Marco F, Soriano A, et al. Analysis of 4758 *Escherichia coli* bacteraemia  
30 26 episodes: predictive factors for isolation of an antibiotic-resistant strain and their impact on  
31 27 the outcome. *J Antimicrob Chemother* 2009;63:568–74.  
32 28  
33 29 94. Szilagyi E, Fuzi M, Borocz K, et al. Risk factors and outcomes for bloodstream infections  
34 30 with extended-spectrum beta-lactamase-producing *Klebsiella pneumoniae* ; Findings of the  
35 31 nosocomial surveillance system in Hungary. *Acta Microbiol Immunol Hung* 2009;56:251–  
36 32 62. doi:  
37 33  
38 34 95. Tsai SS, Huang JC, Chen ST, et al. Characteristics of *Klebsiella pneumoniae* bacteremia in  
39 35 community-acquired and nosocomial infections in diabetic patients. *Chang Gung Med J*  
40 36 2010;33:532–9.  
41 37  
42 38 96. Carrara E, Pfeffer I, Zusman O, et al. Determinants of inappropriate empirical antibiotic  
43 39 treatment: systematic review and meta-analysis. *Int J Antimicrob Agents* 2018;51:548–53,  
44 40  
45 41 97. Horcajada JP, Shaw E, Padilla B, et al. Healthcare-associated, community-acquired and  
46 42 hospital-acquired bacteraemic urinary tract infections in hospitalized patients: a prospective  
47 43  
48 44  
49 45  
50 46  
51 47  
52 48  
53 49  
54 50  
55 51  
56 52  
57 53  
58 54  
59 55  
60 56

- 1  
2  
3 1 multicentre cohort study in the era of antimicrobial resistance. *Clin Microbiol Infect*. 2013  
4 Oct;19(10):96  
5 2  
6 3 98. Gandra S, Barter DM, Laxminarayan R. Economic burden of antibiotic resistance: how  
7 4 much do we really know? *Clin Microbiol Infect* 2014;20:973–80.  
8  
9  
10  
11  
12  
13  
14  
15  
16  
17  
18  
19  
20  
21  
22  
23  
24  
25  
26  
27  
28  
29  
30  
31  
32  
33  
34  
35  
36  
37  
38  
39  
40  
41  
42  
43  
44  
45  
46  
47  
48  
49  
50  
51  
52  
53  
54  
55  
56  
57  
58  
59  
60

For peer review only

1  
2  
3 **1 FIGURE LEGENDS**

4 2  
5 3 Figure 1: Literature search and study inclusion and exclusion

6 4  
7 5 Figure 2: Pooled risk ratios for all-cause mortality in patients with ESBL bloodstream  
8 6 infections compared to patients with non-ESBL bloodstream infections— subgroups not  
9 7 included in attributable mortality

10 8  
11 9 Figure 3: Pooled risk ratios for attributable mortality in patients with ESBL bloodstream  
12 10 infections compared to patients with non-ESBL bloodstream infections

13 11  
14 12 Figure 4: Weighted mean difference in the length of stay for patients with ESBL bloodstream  
15 13 infections compared to patients with non-ESBL bloodstream infections  
16 14

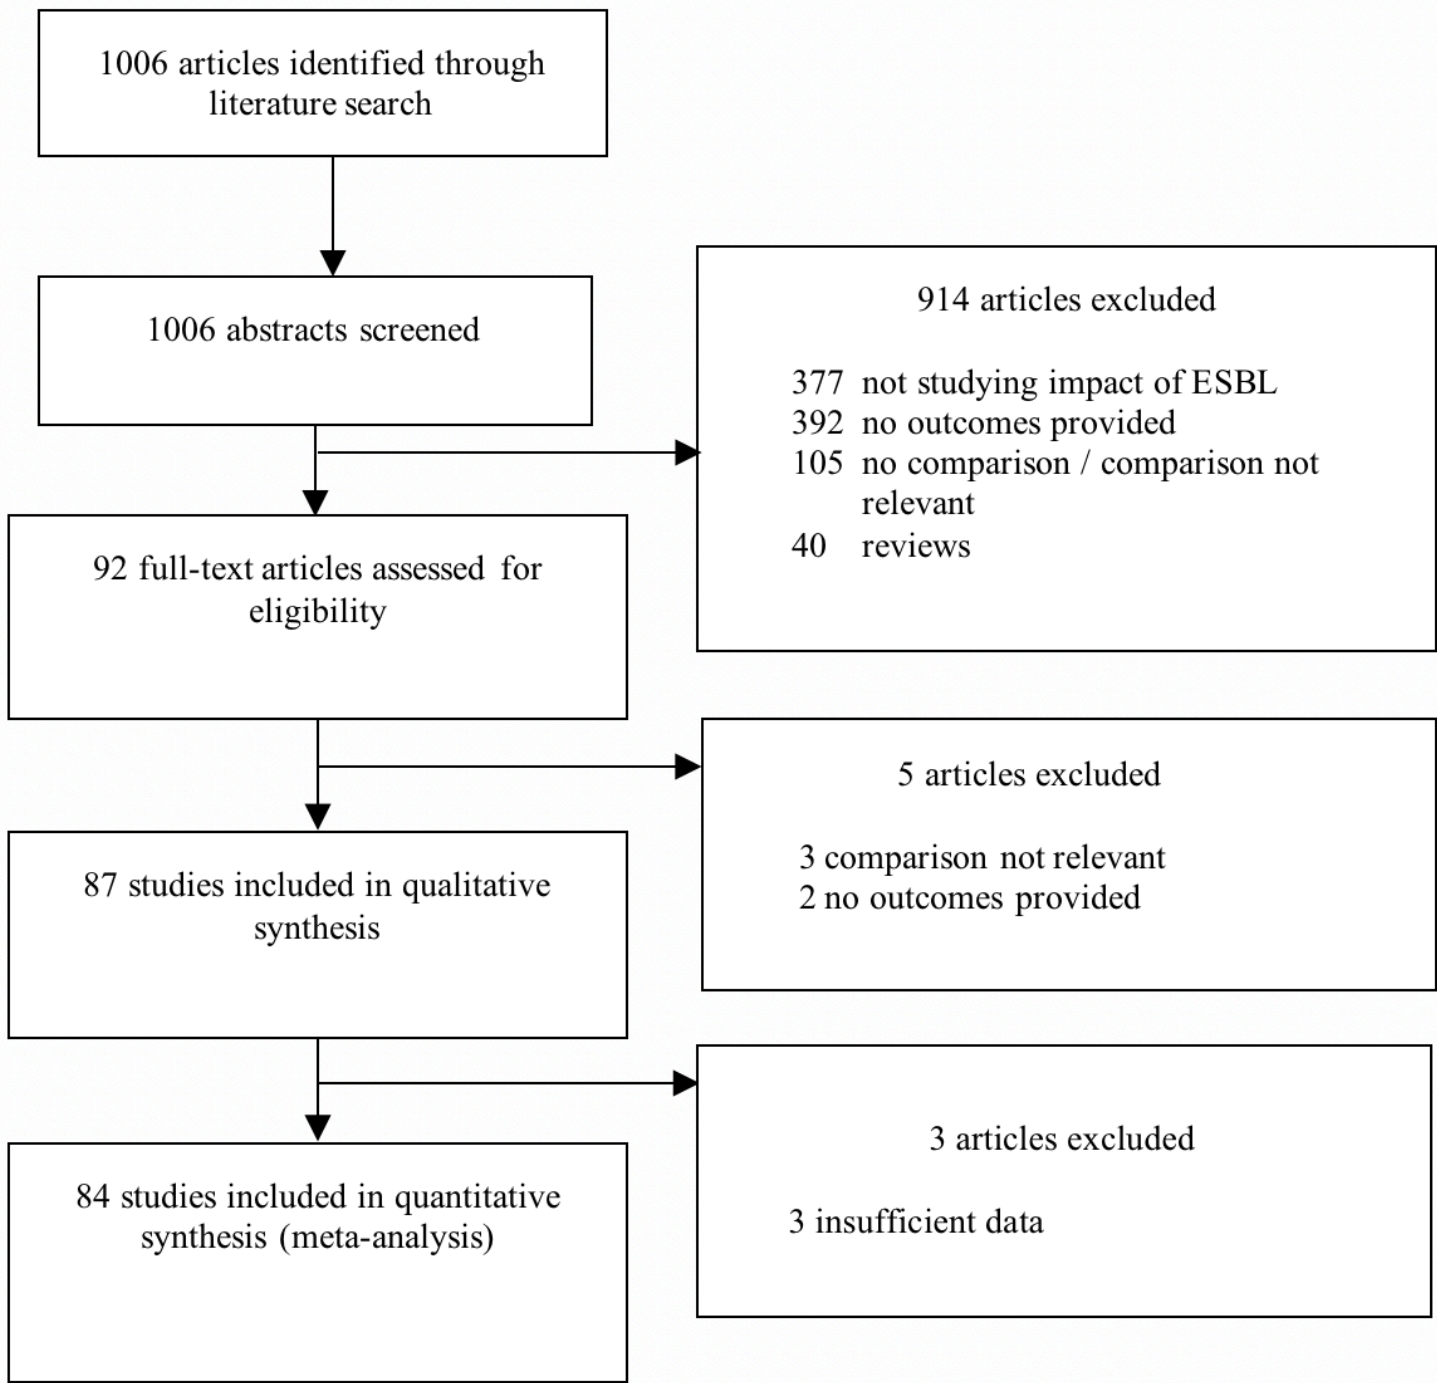

1  
2  
3  
4  
5  
6  
7  
8  
9  
10  
11  
12  
13  
14  
15  
16  
17  
18  
19  
20  
21  
22  
23  
24  
25  
26  
27  
28  
29  
30  
31  
32  
33  
34  
35  
36  
37  
38  
39  
40  
41  
42  
43  
44  
45  
46

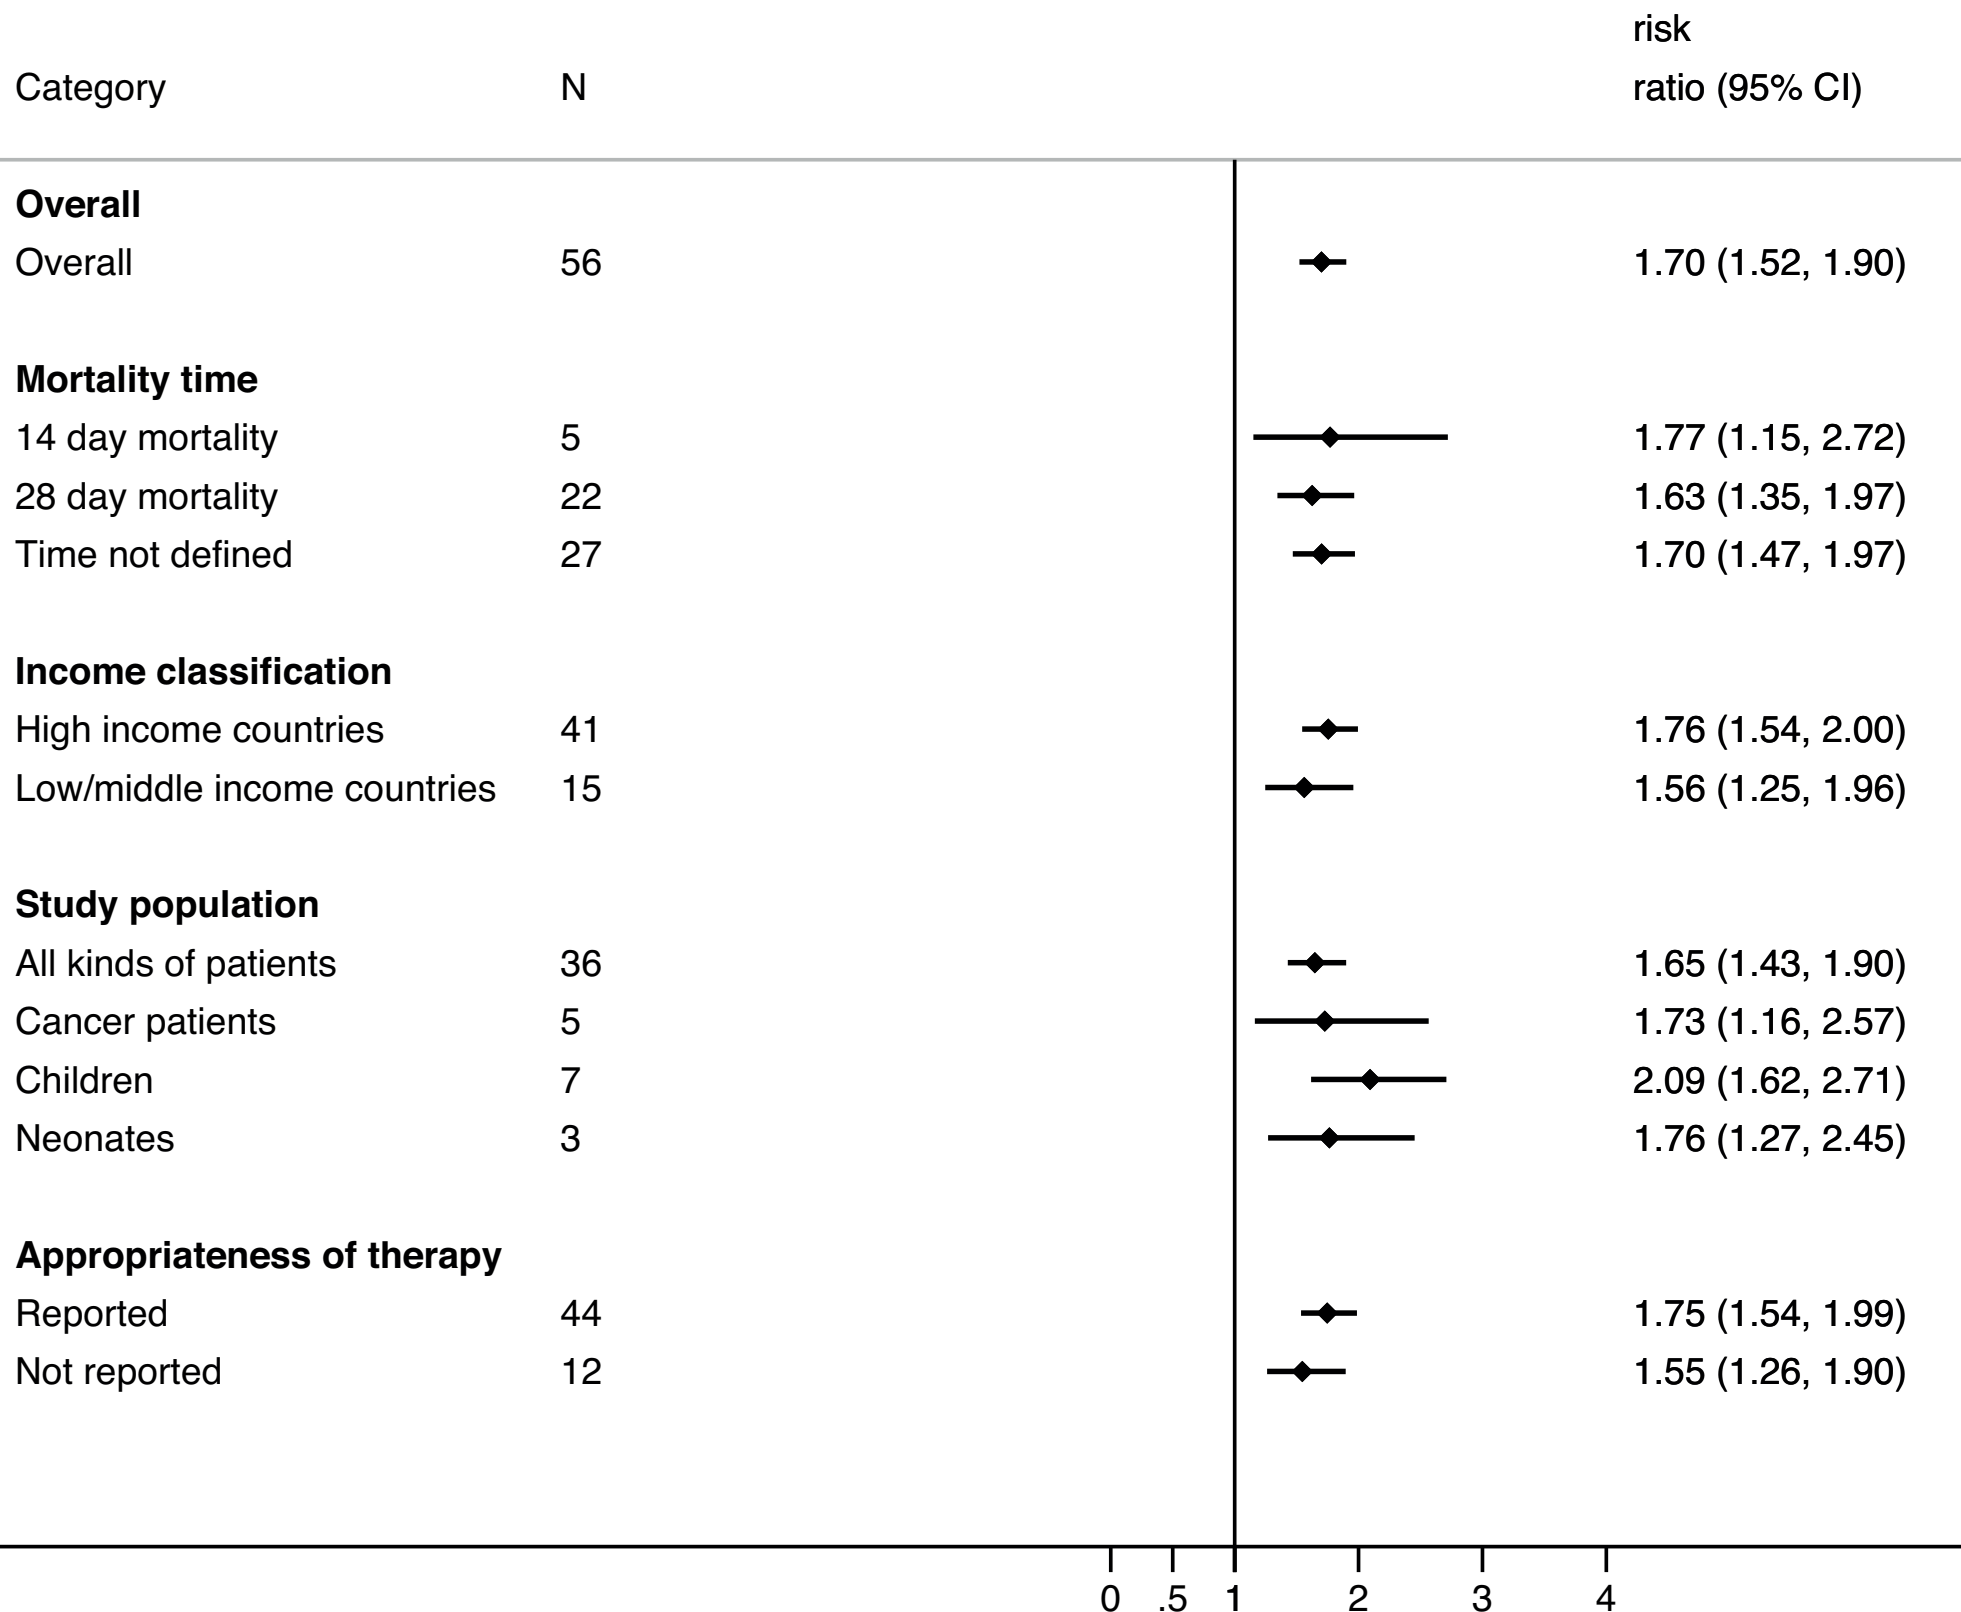



1  
2  
3  
4  
5  
6  
7  
8  
9  
10  
11  
12  
13  
14  
15  
16  
17  
18  
19  
20  
21  
22  
23  
24  
25  
26  
27  
28  
29  
30  
31  
32  
33  
34  
35  
36  
37  
38  
39  
40  
41  
42  
43  
44  
45  
46  
47  
48  
49  
50  
51  
52

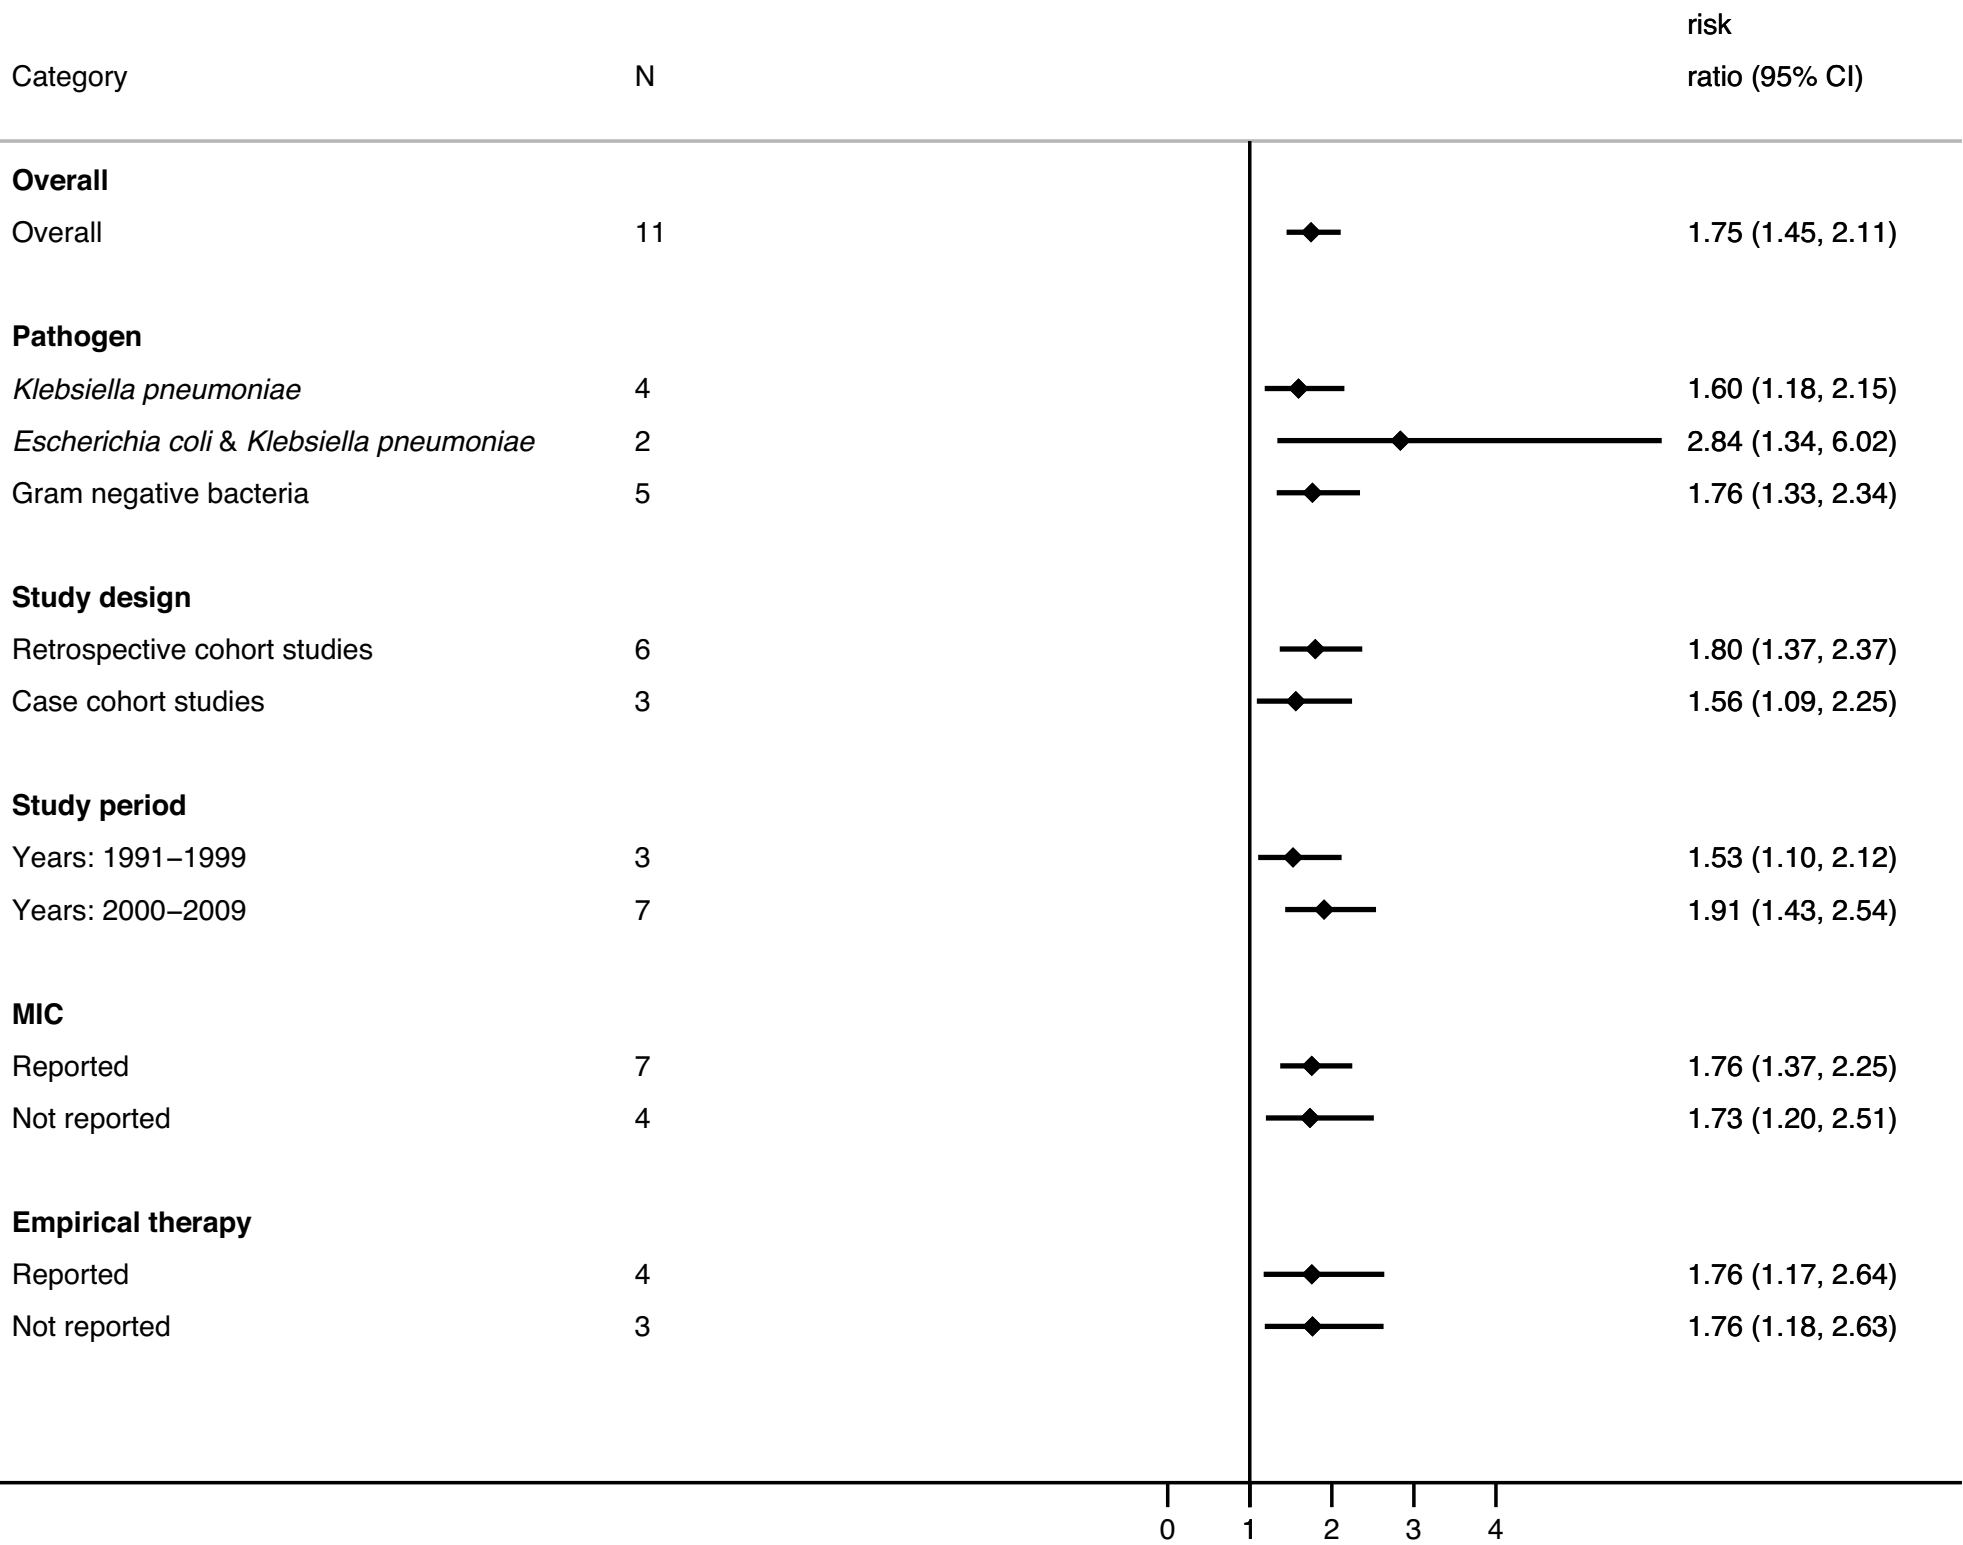

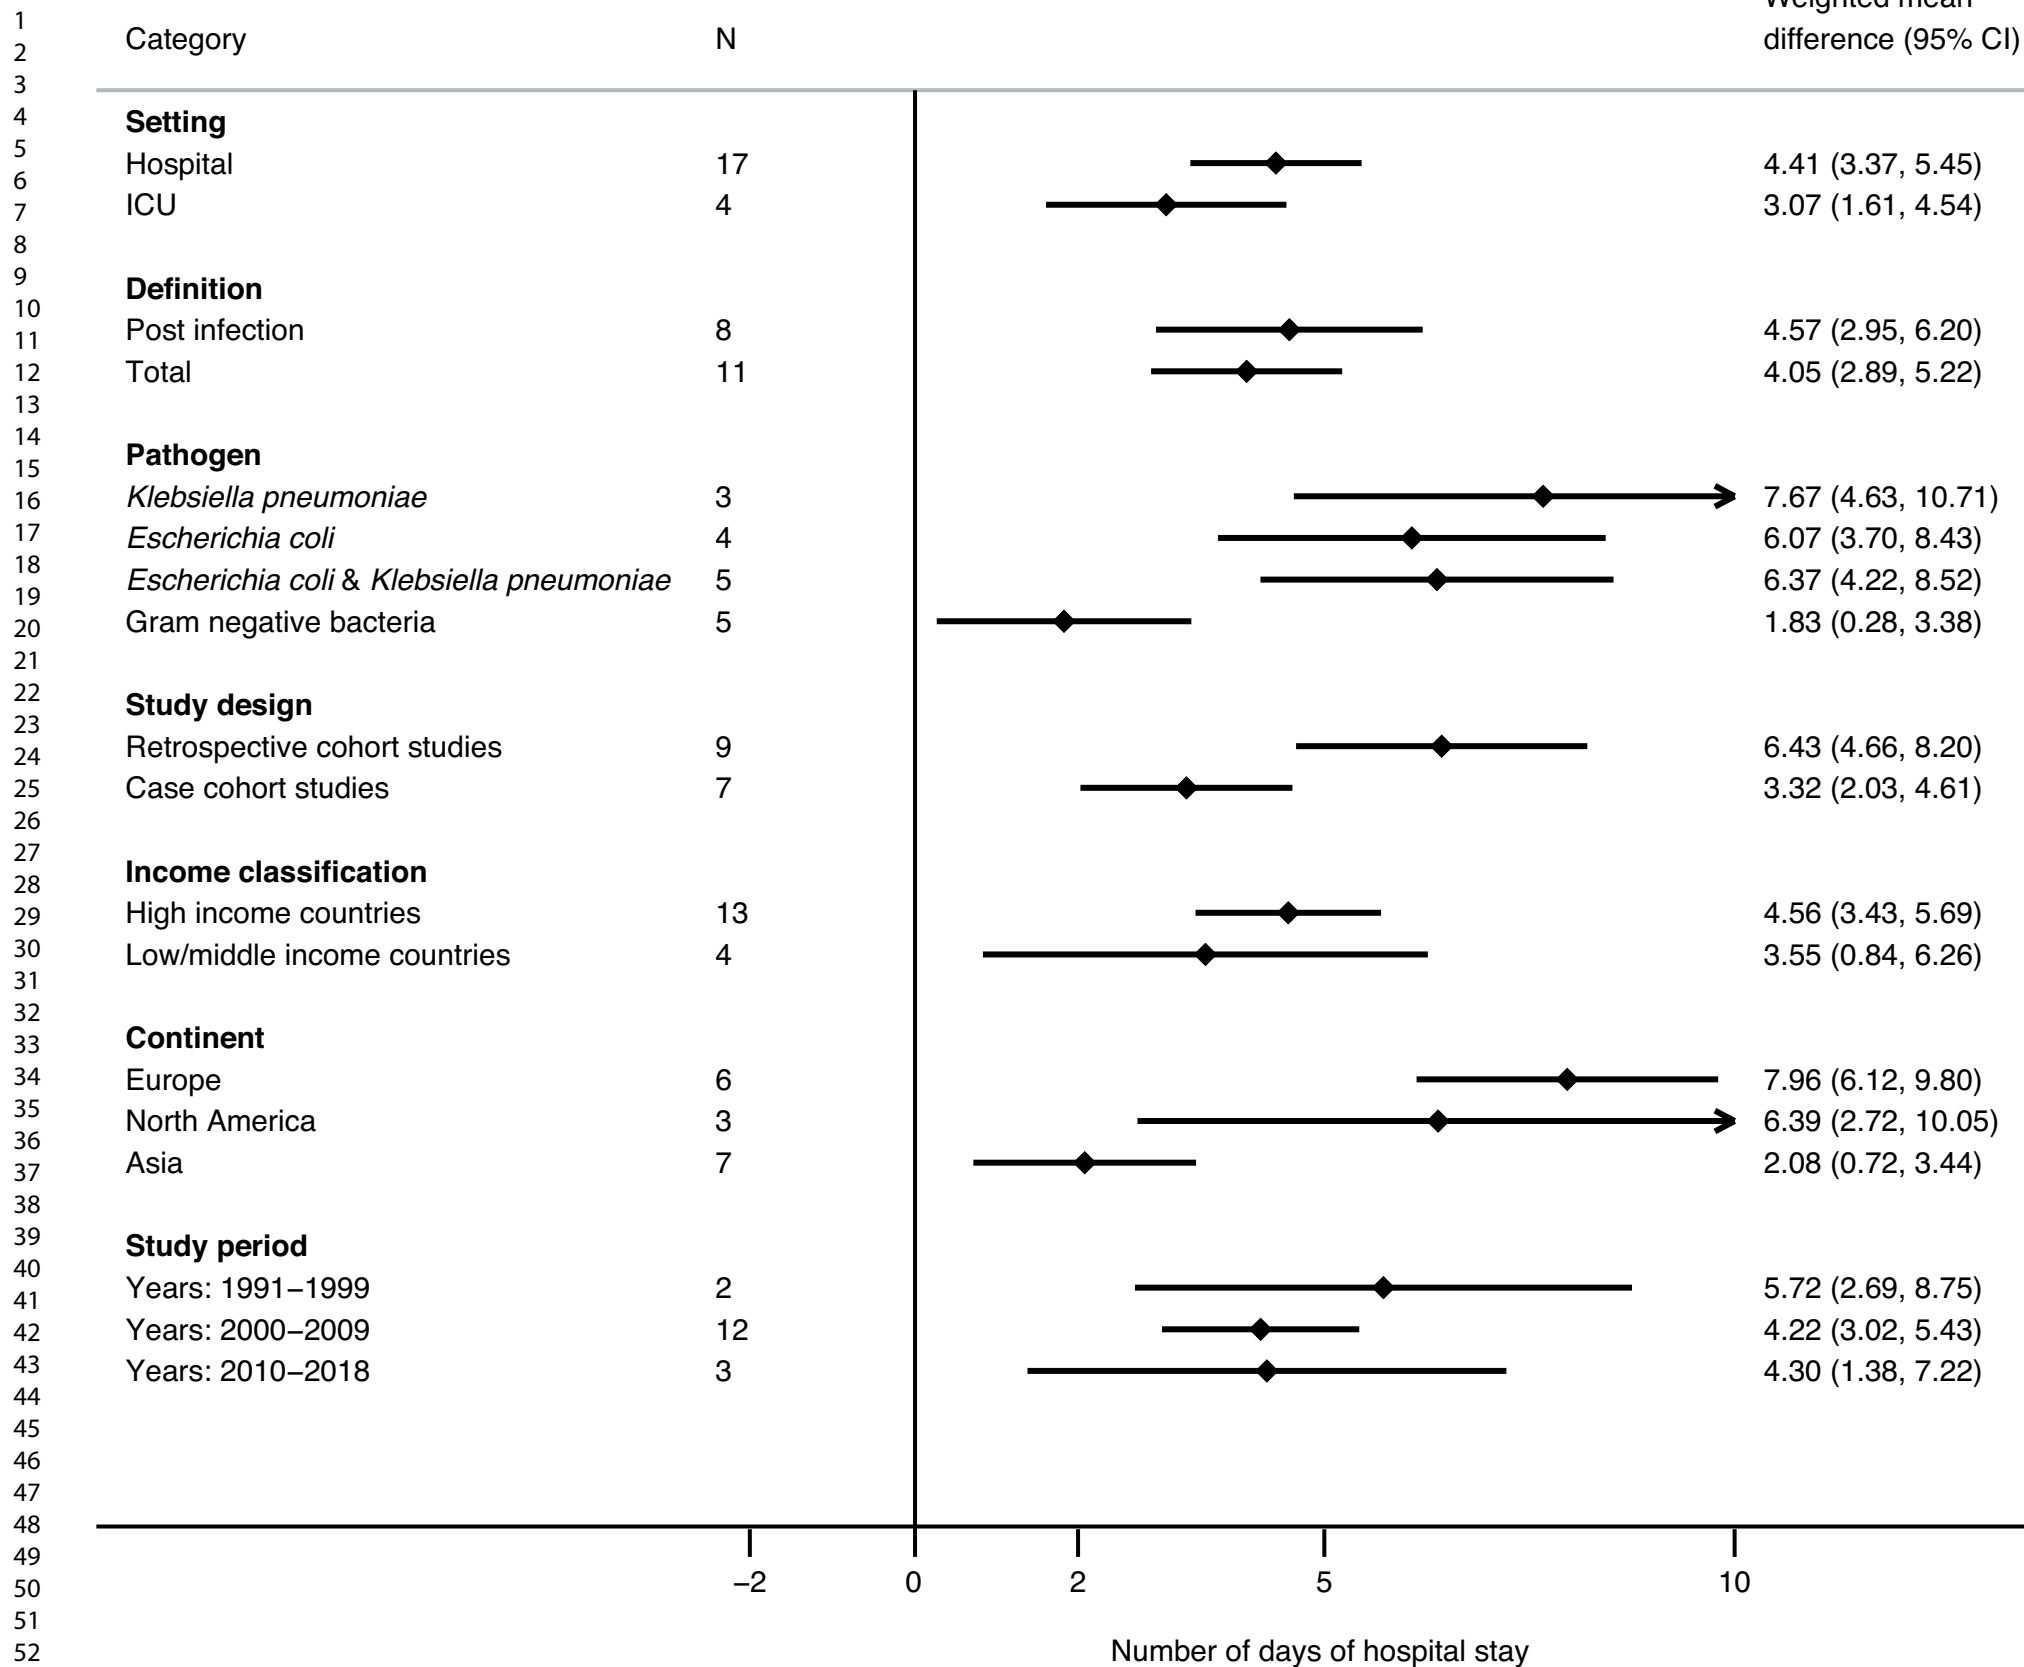

1  
2  
3 **Supplementary figure 1: Funnel plot of risk ratios for all-cause mortality in patients with ESBL bloodstream**  
4 **infections compared to patients with non-ESBL bloodstream**  
5

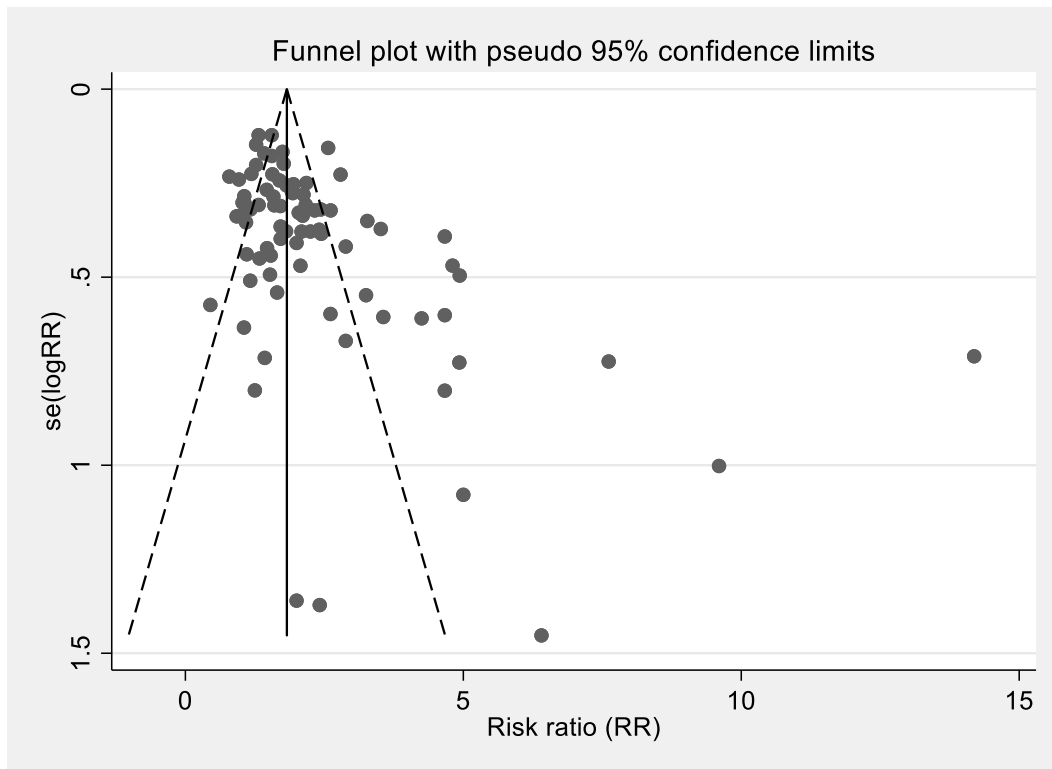

The y axis  $se(\log RR)$  is the standard error of the log risk ratio. Pseudo 95% confidence limit refers to the 95% confidence limits around the summary treatment effect for each standard error on the vertical axis and to the expected distribution of studies in the absence of heterogeneity or of selection biases.

Supplementary figure 2: Funnel plot of weighted mean differences in the length of stay for patients with ESBL bloodstream infections compared to patients with non-ESBL bloodstream infections

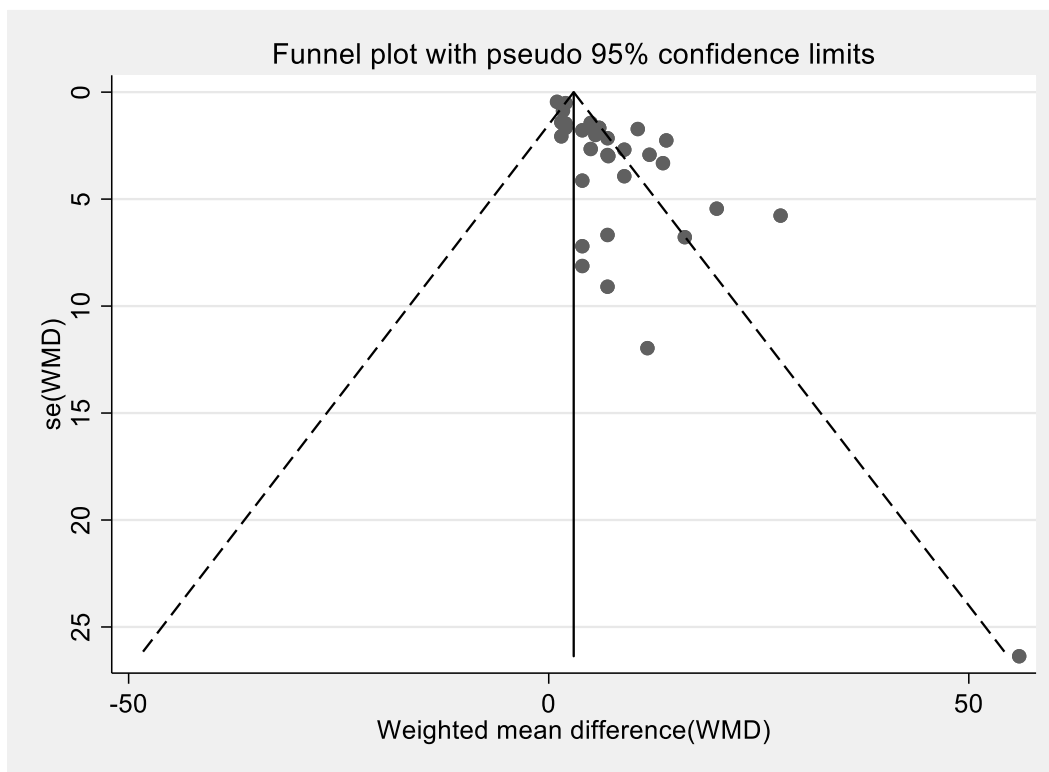

The y axis  $se(WMD)$  is the standard error of the weighted mean difference. Pseudo 95% confidence limit refers to the 95% confidence limits around the summary treatment effect for each standard error on the vertical axis and to the expected distribution of studies in the absence of heterogeneity or of selection biases.

**Supplementary figure 3: Pooled risk ratios for all-cause mortality in patients with ESBL bloodstream infections compared to patients with non-ESBL bloodstream infections—all subgroups**

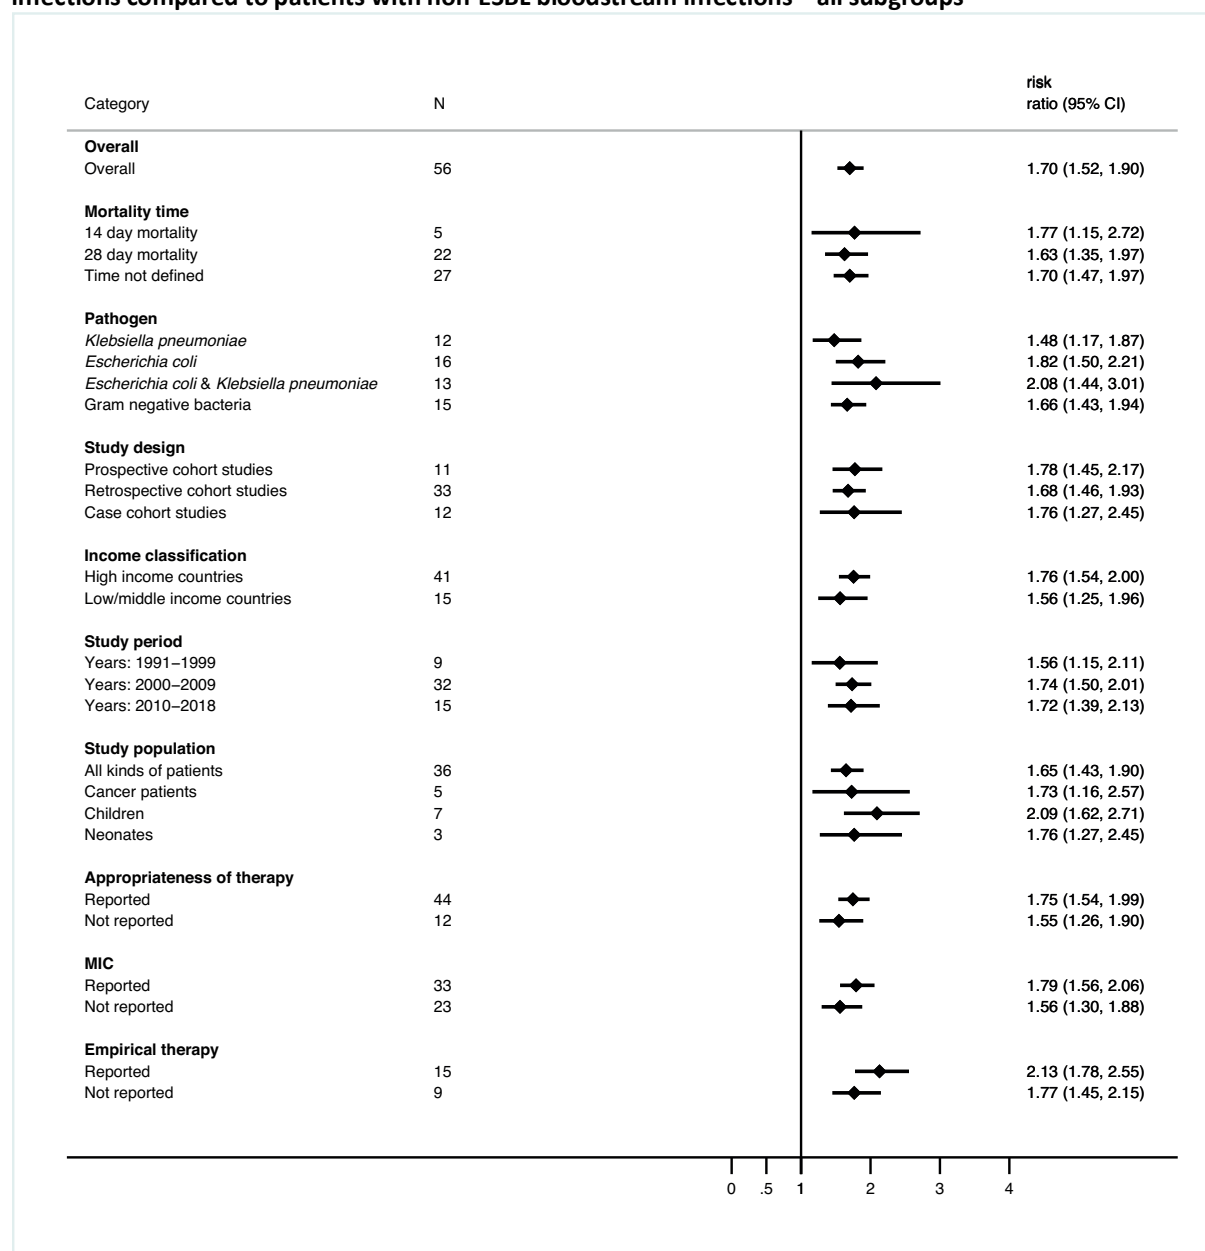

**Supplementary figure 4: Pooled risk ratios for all-cause mortality in patients with noninvasive ESBL infections compared to patients with noninvasive non-ESBL infections**

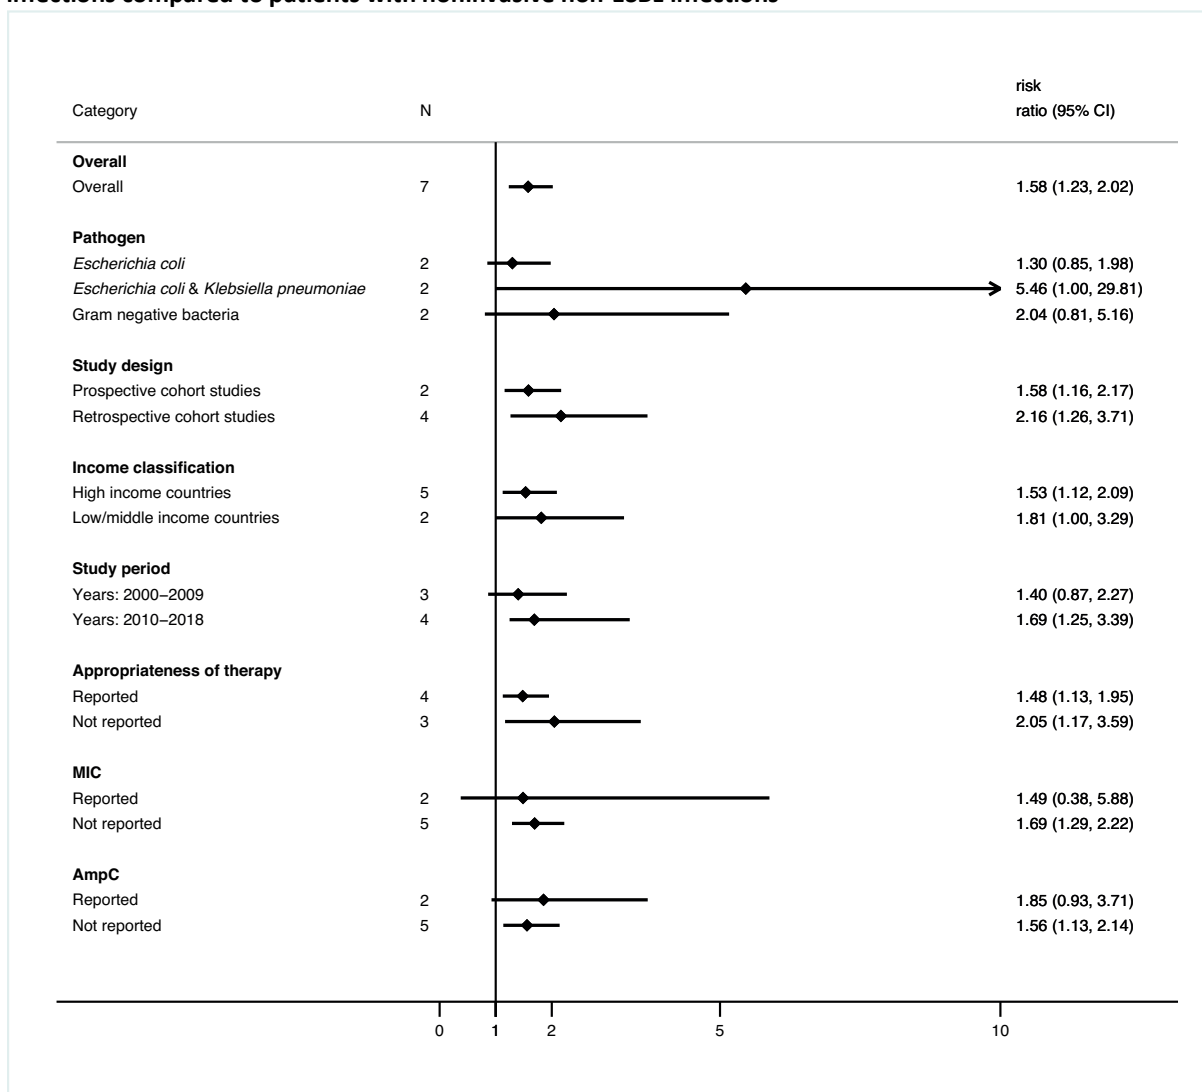

Only

**Supplementary figure 5: Weighted mean differences in length of hospital stay in patients with noninvasive ESBL infections compared to patients with noninvasive non-ESBL infections**

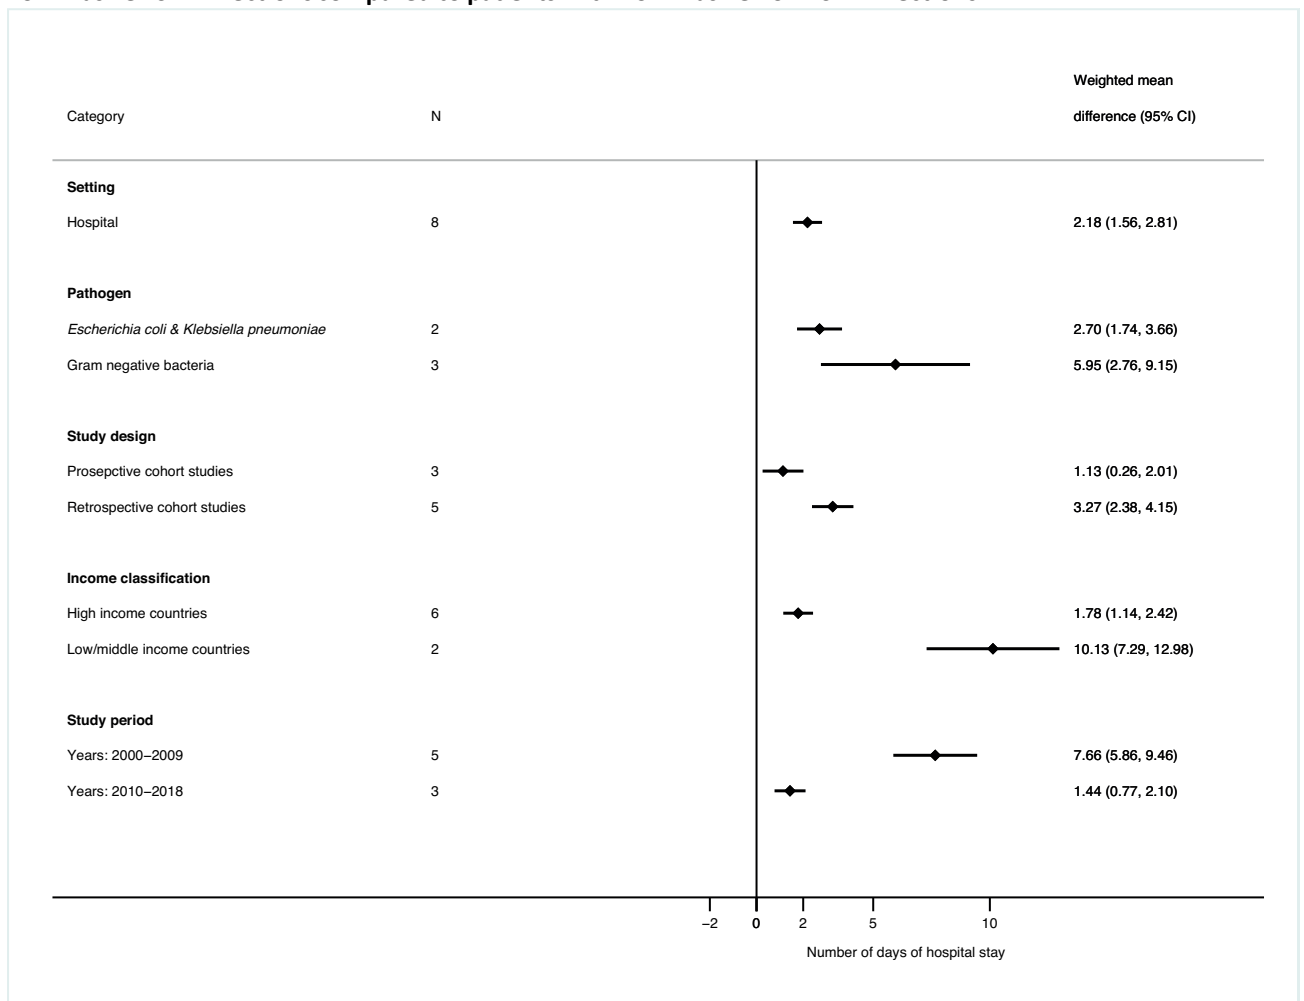

**Supplementary table S1: Search terms used in PubMed :**

((ESBL[tw] OR ""Extended spectrum beta-lactamase""[tw] OR ESBL[Mesh] OR ""Extended spectrum beta-lactamase"" [Mesh]) OR Extended spectrum ? lactamase[tw] OR Extended spectrum ? lactamase[Mesh] )

AND

(Escherichia Coli[Mesh] OR E.coli[Mesh] OR Escherichia Coli[tw] OR E.coli[tw]) ) OR (Klebsiella pneumoniae[Mesh] OR K.Pneumoniae[Mesh] OR Klebsiella pneumoniae[tw] OR K.Pneumoniae[tw])

**Coupled with**

(length of stay[mesh] OR (hospitalisation[tw] AND length[tw]) OR length of hospitalisation[tw] OR length of hospitalization[tw] OR duration of hospitalization[tw] duration of hospitalisation[tw] OR LOS[tw] OR ((period[tw] OR length[tw]) AND (hospital stay[tw] OR hospitalisation[tw] OR hospitalization[tw])) OR

(mortality[mesh] OR mortality[tw] OR death rate[tw] OR fatality[tw] OR survival rate[tw] OR death[tw] OR died[tw] OR dead[tw])) OR

(cost\*[Title/Abstract] OR "costs and cost analysis"[MeSH:noexp])

**Coupled with**

("0001/01/01"[PDat] : "2018/10/01"[PDat]))



Supplementary table S2: Modified Newcastle Ottawa quality assessment scale for case-control studies and cohort studies.

| For case cohort studies, the quality criteria assessed are |                                                                            |     |                                                                                  |
|------------------------------------------------------------|----------------------------------------------------------------------------|-----|----------------------------------------------------------------------------------|
| 1                                                          | Is the case definition adequate?                                           | a*  | yes, with independent validation                                                 |
|                                                            |                                                                            | b   | yes, eg. record linkage or based on self-report                                  |
|                                                            |                                                                            | c   | no description                                                                   |
| 2                                                          | Representativeness of the cases                                            | a*  | consecutive or obviously representative series of cases                          |
|                                                            |                                                                            | b   | potential for selection biases or not stated                                     |
| 3                                                          | Selection of Controls                                                      | a*  | community controls                                                               |
|                                                            |                                                                            | b   | hospital controls                                                                |
|                                                            |                                                                            | c   | no description                                                                   |
| 4                                                          | Definition of Controls                                                     | a*  | no history of disease (endpoint)                                                 |
|                                                            |                                                                            | b   | no description of source                                                         |
| 5                                                          | Comparability of cases and controls on the basis of the design or analysis | a*  | study controls for at least one variable (including age, sex and comorbidities)  |
|                                                            |                                                                            | b** | study controls for more than one variable (including age, sex and comorbidities) |
| 6                                                          | Ascertainment of exposure                                                  | a*  | secure record (eg surgical records)                                              |
|                                                            |                                                                            | b   | structured interview blind to case/control status                                |
|                                                            |                                                                            | c   | interview not blinded to case/control status                                     |
|                                                            |                                                                            | d   | written self-report or medical record only                                       |
|                                                            |                                                                            | e   | no description                                                                   |
| 7                                                          | Same method of ascertainment for cases and controls                        | a*  | yes                                                                              |
|                                                            |                                                                            | b   | no                                                                               |
|                                                            |                                                                            | c   | unclear                                                                          |
| 8                                                          | Non-Response rate                                                          | a   | same rate for both groups                                                        |
|                                                            |                                                                            | b   | non respondents described                                                        |
|                                                            |                                                                            | c   | rate different and no designation                                                |
| For cohort studies, the quality criteria assessed are      |                                                                            |     |                                                                                  |
| 1                                                          | Representativeness of the exposed cohort                                   | a*  | truly representative                                                             |
|                                                            |                                                                            | b*  | somewhat representative                                                          |
|                                                            |                                                                            | c   | selected group of users                                                          |
|                                                            |                                                                            | d   | no description                                                                   |
| 2                                                          | Selection of the non-exposed cohort                                        | a*  | drawn from the same community as the exposed cohort                              |
|                                                            |                                                                            | b   | drawn from a different source                                                    |
|                                                            |                                                                            | c   | no description of the derivation of the non-exposed cohort                       |
| 3                                                          | Ascertainment of exposure                                                  | a*  | secure record (eg surgical records)                                              |
|                                                            |                                                                            | a*  | structured interview                                                             |
|                                                            |                                                                            | c   | written self-report                                                              |
|                                                            |                                                                            | d   | no description                                                                   |
| 4                                                          | Demonstration that outcome of interest was not present at start of study   | a*  | yes                                                                              |
|                                                            |                                                                            | b   | no                                                                               |
|                                                            |                                                                            | c   | unclear                                                                          |
| 5                                                          | Comparability of cohorts on the basis of the design or analysis            | a*  | study controls for age or comorbidities                                          |
|                                                            |                                                                            | b** | study controls for age and comorbidities                                         |
| 6                                                          | Assessment of outcome:                                                     | a*  | independent blind assessment                                                     |
|                                                            |                                                                            | b*  | record linkage                                                                   |
|                                                            |                                                                            | c   | self-report                                                                      |
|                                                            |                                                                            | d   | no description                                                                   |

|   |                                             |    |                                                                                                                                    |
|---|---------------------------------------------|----|------------------------------------------------------------------------------------------------------------------------------------|
| 7 | Follow-up long enough for outcomes to occur | a* | yes                                                                                                                                |
|   |                                             | b  | no                                                                                                                                 |
|   |                                             | c  | unclear                                                                                                                            |
| 8 | Adequacy of follow up of cohorts            | a* | complete follow up – all that matters subjects accounted for, subjects lost to follow up unlikely to introduce bias - small number |
|   |                                             | b* | inadequate numbers but description provided of those lost                                                                          |
|   |                                             | c  | inadequate follow up rate and no description of those lost                                                                         |
|   |                                             | d  | no statement                                                                                                                       |

Thresholds for converting the Newcastle-Ottawa scales to AHRQ standards (good, fair, and poor):

**Good quality:** 3 or 4 stars in selection domain AND 1 or 2 stars in comparability domain AND 2 or 3 stars in outcome/exposure domain

**Fair quality:** 2 stars in selection domain AND 1 or 2 stars in comparability domain AND 2 or 3 stars in outcome/exposure domain

**Poor quality:** 0 or 1 star in selection domain OR 0 stars in comparability domain OR 0 or 1 stars in outcome/exposure domain

EW Only

1  
2  
3  
4  
5  
6  
7  
8  
9  
10  
11  
12  
13  
14  
15  
16  
17  
18  
19  
20  
21  
22  
23  
24  
25  
26  
27  
28  
29  
30  
31  
32  
33  
34  
35  
36  
37  
38  
39  
40  
41  
42  
43  
44  
45  
46

**Supplementary table S3: Study characteristics overview**

| Subgroup                                                                                                                    | All Studies | Bloodstream infections | Noninvasive infections |
|-----------------------------------------------------------------------------------------------------------------------------|-------------|------------------------|------------------------|
|                                                                                                                             | <b>87</b>   | <b>57</b>              | <b>10</b>              |
| <b>Country</b>                                                                                                              |             |                        |                        |
| South Korea <sup>11,12,14,15,29,33,36,40,42,44,49,50,55,57</sup>                                                            | 14          | 9                      | 2                      |
| Thailand <sup>22,24,43,51-53,86</sup>                                                                                       | 7           | 3                      |                        |
| USA <sup>8,16,26,30,46,59,67</sup>                                                                                          | 7           | 2                      | 1                      |
| Spain <sup>34,38,56,60,68,89,92</sup>                                                                                       | 7           | 4                      | 2                      |
| Taiwan <sup>10,37,62,69,80,82,94</sup>                                                                                      | 7           | 5                      | 2                      |
| China <sup>58,71,72,75,85</sup>                                                                                             | 5           | 4                      |                        |
| Israel <sup>21,45,90,91</sup>                                                                                               | 4           | 3                      |                        |
| Germany <sup>9,39,41,61</sup>                                                                                               | 4           | 3                      |                        |
| Italy <sup>23,31,35</sup>                                                                                                   | 3           | 3                      |                        |
| Japan <sup>74,79,84</sup>                                                                                                   | 3           | 3                      |                        |
| Tanzania <sup>17,64,73</sup>                                                                                                | 3           | 3                      |                        |
| India <sup>47,48,78</sup>                                                                                                   | 3           | 1                      | 1                      |
| Canada <sup>63,65,83</sup>                                                                                                  | 3           | 2                      |                        |
| UK <sup>20,28,87</sup>                                                                                                      | 3           | 3                      |                        |
| France <sup>66,77</sup>                                                                                                     | 2           | 1                      | 1                      |
| South Africa <sup>13,81</sup>                                                                                               | 2           | 1                      |                        |
| Brazil <sup>13,81</sup>                                                                                                     | 2           | 2                      |                        |
| Greece <sup>88</sup>                                                                                                        | 1           | 1                      |                        |
| Hungary <sup>93</sup>                                                                                                       | 1           | 1                      |                        |
| Lebanon <sup>25</sup>                                                                                                       | 1           | -                      |                        |
| Malaysia <sup>27</sup>                                                                                                      | 1           | -                      | 1                      |
| Mexico <sup>70</sup>                                                                                                        | 1           | 1                      |                        |
| Saudi Arabia <sup>18</sup>                                                                                                  | 1           | 1                      |                        |
| Turkey <sup>76</sup>                                                                                                        | 1           | 1                      |                        |
| <b>Continent</b>                                                                                                            |             |                        |                        |
| Asia <sup>10-12,14,15,18,21,22,23,25,27,29,33,36,37,40,42-45,47-53,55,57,58,62,69,71,72,74,74,78-80,82,84-86,90,91,94</sup> | 46          | 29                     | 6                      |
| Europe <sup>9,20,23,28,31,34,35,38,39,41,56,60,61,66,68,76,77,87-89,92,93</sup>                                             | 22          | 17                     | 3                      |
| North America <sup>8,16,26,30,46,59,63,65,67,83</sup>                                                                       | 10          | 4                      | 1                      |
| Africa <sup>13,17,64,73,81</sup>                                                                                            | 5           | 4                      | -                      |
| South America <sup>19,32,70</sup>                                                                                           | 3           | 3                      | -                      |
| More than 1 continent <sup>54</sup>                                                                                         | 1           | -                      | -                      |

|                                                                                                                                |    |    |   |
|--------------------------------------------------------------------------------------------------------------------------------|----|----|---|
| <b>Income group</b>                                                                                                            |    |    |   |
| High-income countries <sup>8-12,14-16,18,20,21,23,26,28-31,34-42,44-46,49,50,55-57,59-63,65-69,74,77,79,80,82-84,87-94,</sup>  | 60 | 41 | 8 |
| Low- and middle-income countries <sup>13,17,19,22,24,25,27,32,43,48,51-53,58,64,70-73,75,76,78,81,85,86</sup>                  | 26 | 16 | 2 |
| High-income countries AND Low- and middle-income countries <sup>54</sup>                                                       | 1  | -  | - |
| <b>Study design</b>                                                                                                            |    |    |   |
| Case cohort study <sup>8,10,22-26,29,38,42,44,53,56,59,61-63,65-67,83-85</sup>                                                 | 24 | 14 |   |
| Retrospective cohort study <sup>9,11-15,18,19,21,27,31-36,39-41,43,45,46,48-52,57,58,69,71,72,74-76,79-82,86,87,91,93,94</sup> | 44 | 32 |   |
| Prospective cohort study <sup>16,17,28,30,37,47,54,60,64,68,70,73,77,78,88-90,92</sup>                                         | 18 | 11 |   |
| <b>Year group</b>                                                                                                              |    |    |   |
| 1991-1999 <sup>8,58,13,14,15,60,19,23,26,34,44,91,92</sup>                                                                     | 13 | 10 | - |
| 2000-2009 <sup>9-12,16-18,20-22,24,25,27-33,35-43,45,47-50,52,53,55,56,59,61,62,65-67,87-90,93,94</sup>                        | 49 | 31 | 6 |
| 2010-2018 <sup>46,51,52,57,63,64,68-86</sup>                                                                                   | 25 | 16 | 4 |
| <b>Pathogen</b>                                                                                                                |    |    |   |
| <i>Escherichia coli</i> <sup>9,22,28,31,33-35,38,41,43,50,53,56,57,66,68,69,71,74,84,85,89,92</sup>                            | 23 | 16 | 3 |
| <i>Klebsiella pneumoniae</i> <sup>13,14,18,19,23,27,30,32,39,41,45,59,60,72,76,81,93,94</sup>                                  | 17 | 11 | 1 |
| <i>E. coli</i> and <i>K. pneumoniae</i> <sup>8,11,12,15,24,26,36,41,42,44,46,48,49,52,55,58,61,67,83,86,87</sup>               | 20 | 13 | 2 |
| Gram-negative bacteria <sup>10,16,17,20,21,25,29,37,40,47,51,54,62-65,70,73,75,77-80,82,88,90,91</sup>                         | 27 | 17 | 4 |
| <b>Study setting</b>                                                                                                           |    |    |   |
| Entire hospital <sup>8,9,14,16,18-25,27,28,31-36,38-44,46-48,50-53,56-58,60,63-67,71,72,74,80,83,84,88-94</sup>                | 57 | 40 | 7 |
| Intensive care unit <sup>30,59,62,73,77-79,86,87</sup>                                                                         | 9  | 5  | 1 |
| Pediatric ward <sup>15,17,26,49,55,76,81,86</sup>                                                                              | 8  | 7  | - |
| Neonatal ward <sup>13,59,62,69,73</sup>                                                                                        | 5  | 3  | - |
| Neonatal intensive care unit <sup>59,62,73</sup>                                                                               | 3  | 2  | - |
| Medical ward <sup>11,37,68</sup>                                                                                               | 3  | -  | 2 |
| Not provided <sup>29,45</sup>                                                                                                  | 2  | -  | - |
| Emergency Department <sup>10,82</sup>                                                                                          | 2  | 2  | - |
| Surgical ward <sup>30,54</sup>                                                                                                 | 2  | -  | - |
| Burn unit <sup>30</sup>                                                                                                        | 1  | -  | - |
| Oncology <sup>70</sup>                                                                                                         | 1  | 1  | - |
| Referral centre for hepatopacreaticobiliary diseases <sup>75</sup>                                                             | 1  | -  | - |
| Hematological <sup>12</sup>                                                                                                    | 1  | 1  | - |

|                                                                                                                                                               |    |    |   |
|---------------------------------------------------------------------------------------------------------------------------------------------------------------|----|----|---|
| <b>Study population</b>                                                                                                                                       |    |    |   |
| All kinds of patients <sup>8-11,12,16,18-25,27,28,32,33,37-39,41-44,46-48,50-54,56,58,60,61,63-67,74,80,82-84,88,90-93</sup>                                  | 55 | 36 | 7 |
| Intensive care unit patients <sup>30,77-79,85,87</sup>                                                                                                        | 6  | 3  | 1 |
| Children <sup>15,17,26,49,55,76,81,86</sup>                                                                                                                   | 8  | 7  | - |
| Neonates <sup>13,59,62,69,73</sup>                                                                                                                            | 5  | 3  | - |
| Cancer patients <sup>31,49,57,70,89</sup>                                                                                                                     | 5  | 5  | - |
| Immunocompromised patients <sup>49</sup>                                                                                                                      | 1  | 1  | - |
| Diabetic patients <sup>94</sup>                                                                                                                               | 1  | 1  | - |
| Elderly patients <sup>68</sup>                                                                                                                                | 1  | -  | 1 |
| Patients with chemotherapy/stem cell transplantation <sup>12,89</sup>                                                                                         | 2  | 2  | - |
| Patients after prostatitis biopsy <sup>40</sup>                                                                                                               | 1  | -  | 1 |
| Lungs transplantation patients <sup>45</sup>                                                                                                                  | 1  | -  | - |
| Hematological patients <sup>71</sup>                                                                                                                          | 1  | 1  | - |
| All except cardiothoracic therapy, transplant surgery, burns <sup>72</sup>                                                                                    | 1  | 1  |   |
| Patients with pyogenic liver abscess <sup>75</sup>                                                                                                            | 1  | -  | - |
|                                                                                                                                                               |    |    |   |
| <b>Data reported</b>                                                                                                                                          |    |    |   |
| Treatment information <sup>8,10-11,21-24,28-36,38,42-47,49,50,52-63,65,66,68-94</sup>                                                                         | 74 | 50 | 6 |
| Appropriateness of treatment <sup>8,10-12,14,15,17-19,21-24,28-36,38,42-44,46,47,49,50,52-54,56-58,60-63,65,66,68,70-72,74,75,77,79,81-84,87-94</sup>         | 62 | 45 | 5 |
| Empirical therapy <sup>12,14,15,22,23,31,33-36,38,42,49,50,54,56,57,61,74,79,81,92</sup>                                                                      | 22 | 16 | 2 |
| Treatment outcome <sup>8,10-19,23,24,28-36,38,42-47,49,50,52-55,57-63,65,66,70-72,74,76-79,81-84,86-90,92-94</sup>                                            | 64 | 45 | 3 |
| Minimum inhibitory concentration results <sup>8,9,11,12,14-17,20-23,25,26,30,31,33-39,41,42,45,48-50,52-57,60,61,64,66,67,74-76,78,79,81,83-85,87,92,93</sup> | 52 | 34 | 4 |
| AmpC genotyping <sup>8,9,15,30,39,44,48,54,55,63,64,68,84</sup>                                                                                               | 13 | 6  | 2 |

Supplementary table S4: Characteristics for each study

|                                  | Years     | Country                                               | Study design                | Control group      | Study population                                                                          | Setting                    | Outcome definition           | Main objective                                                                                                                                                                                                       | Pathogen |
|----------------------------------|-----------|-------------------------------------------------------|-----------------------------|--------------------|-------------------------------------------------------------------------------------------|----------------------------|------------------------------|----------------------------------------------------------------------------------------------------------------------------------------------------------------------------------------------------------------------|----------|
| Lautenbach E <sup>8</sup>        | 1997-1998 | USA                                                   | Case cohort study           | Non-ESBL-infection | All kinds of patients                                                                     | Entire hospital            | Attributable mortality; LOS  | Risk factors for infection with ESBL-producing pathogens, difference in clinical outcomes of infections: resistant vs. susceptible organisms                                                                         | EC, KP   |
| Kim SH <sup>12</sup>             | 2007-2008 | South Korea                                           | Cohort study, Retrospective | Non-ESBL-infection | Patients who received either chemotherapy or stem cell transplantation; neutropenic fever | Hematological ward, Others | All-cause mortality (28 day) | Risk factors for acquisition of ESBL, appropriateness of empirical antimicrobial therapy, clinical outcomes in relation to ESBL production                                                                           | EC, KP   |
| Chayakulkeere M <sup>51</sup>    | 2015-2015 | Thailand                                              | Cohort study, Retrospective | Non-ESBL-infection | All kinds of patients                                                                     | Entire hospital            | All-cause mortality          | Prevalence & risk factors for infections with & antibiotic susceptibility patterns of & outcomes of patients infected with ESBL-producing-GNB                                                                        | GNB      |
| Pisarntharak A <sup>52</sup>     | 2003-2007 | Thailand                                              | Cohort study, Retrospective | Non-ESBL-infection | All kinds of patients                                                                     | Entire hospital            | All-cause mortality, LOS     | Predictors for mortality associated with community-onset BSI with ESBL-producing pathogens, initial empirical antimicrobial regimens, associated hospital resource utilisation, costs accrued after diagnosis of BSI | EC, KP   |
| Pisarntharak A <sup>53</sup>     | 2003-2004 | Thailand                                              | Case cohort study           | Non-ESBL-infection | All kinds of patients                                                                     | Entire hospital            | All-cause mortality, LOS     | Mortality associated with community-onset infection due to ESBL-producing pathogens, associated hospital resource use, post-infection hospital cost                                                                  | EC       |
| Jean SS <sup>54</sup>            | 2010-2011 | Portugal, Columbia, the Philippines, Taiwan, Thailand | Cohort study, prospective   | Non-ESBL-infection | All kinds of patients                                                                     | Surgical ward              | Attributable mortality, LOS  | Clinical impact on hospitalised patients with community-acquired complicated intra-abdominal infection: ESBL-producing- vs. non-ESBL-producing pathogens                                                             | GNB      |
| Lee J <sup>55</sup>              | 1999-2005 | South Korea                                           | interventional studies      | Non-ESBL-infection | Children                                                                                  | Pediatric ward             | All-cause mortality (28 day) | impact of a change in antibiotic policy on ESBL-prevalence                                                                                                                                                           | EC, KP   |
| Briongos-Figuero A <sup>56</sup> | 2009-2010 | Spain                                                 | Case cohort study           | Non-ESBL-infection | All kinds of patients                                                                     | Entire hospital            | All-cause mortality          | Characteristics & associated risk factors for EBSL-enterobacteria-UTIs                                                                                                                                               | EC       |
| Ha YE <sup>57</sup>              | 2010-2012 | South Korea                                           | Cohort study, retrospective | Non-ESBL-infection | Patients with cancer                                                                      | Entire hospital            | All-cause mortality (28 day) | Clinical & molecular epidemiology of ESBL-EC bacteraemia, clinical impact of ESBLs on patient outcome                                                                                                                | EC       |
| Du B <sup>58</sup>               | 1997-1999 | China                                                 | Cohort study, retrospective | Non-ESBL-infection | All kinds of patients                                                                     | Entire hospital            | All-cause mortality          | Risk factors for nosocomial ESBL-EC- and ESBL-KP- bacteraemia & influence on patient outcome.                                                                                                                        | EC, KP   |

|    | Years                        | Country   | Study design | Control group               | Study population                                                                   | Setting               | Outcome definition | Main objective                                   | Pathogen                                                                                                                                                                                                                                                                                                                                                                                                                                                                                                          |        |
|----|------------------------------|-----------|--------------|-----------------------------|------------------------------------------------------------------------------------|-----------------------|--------------------|--------------------------------------------------|-------------------------------------------------------------------------------------------------------------------------------------------------------------------------------------------------------------------------------------------------------------------------------------------------------------------------------------------------------------------------------------------------------------------------------------------------------------------------------------------------------------------|--------|
| 5  | Stone PW <sup>59</sup>       | 2001      | USA          | Case cohort study           | Non-ESBL-infection                                                                 | Neonates at NICU      | NICU               | LOS                                              | costs of interventions aimed at controlling the outbreak, attributable length of stay associated with infection and colonisation with ESBL-KP                                                                                                                                                                                                                                                                                                                                                                     | KP     |
| 8  | Pillay T <sup>13</sup>       | 1995-1996 | South Africa | Cohort study, retrospective | Non-ESBL-infection                                                                 | Neonates              | Neonatal ward      | All-cause mortality                              | Use of piperacillin/tazobactam in treatment of KP- infection                                                                                                                                                                                                                                                                                                                                                                                                                                                      | KP     |
| 10 | Kim BN <sup>14</sup>         | 1999-2000 | South Korea  | Cohort study, retrospective | Non-ESBL-infection                                                                 | All kinds of patients | Entire hospital    | Attributable mortality, LOS                      | Prevalence & clinical characteristics of ESBL-KP- bacteraemia, impact of ESBL- production on outcome of patients with KP- bacteraemia in endemic situation.                                                                                                                                                                                                                                                                                                                                                       | KP     |
| 13 | Kim YK <sup>15</sup>         | 1993-1998 | South Korea  | Cohort study, retrospective | Non-ESBL-infection                                                                 | Children              | Pediatric ward     | All-cause mortality                              | Risk factors & clinical outcomes & clinical responses to treatment of ESBL-EC- and ESBL-KP-bacteraemia, prevalence and types of their ESBLs                                                                                                                                                                                                                                                                                                                                                                       | EC, KP |
| 16 | Bhavnani SM <sup>16</sup>    | 2001-2002 | USA          | Cohort study, prospective   | Non-ESBL-infection                                                                 | All kinds of patients | Entire hospital    | Attributable mortality, all-cause mortality      | Risk factors for occurrence of invasive ESBL-EC- and ESBL-KP-infections, factors associated with clinical outcome, drug regimens for treatment of infections associated ESBL/non-ESBL strains in real-life clinical practice, clinical response rates for patients treated with cephalosporins/other classes of antimicrobial agents, /carbapenems, clinical response for those patients with infection associated with ESBL and non-ESBL-producing strains with MIC values V8 Ag/mL treated with cephalosporins. | GNB    |
| 24 | Blomberg B <sup>17</sup>     | 2001-2002 | Tanzania     | Cohort study, prospective   | Non-ESBL-infection                                                                 | Neonates, children    | Pediatric ward     | All-cause mortality                              | Prevalence & clinical implications of ESBL production in EC-,KP-, Salmonellae- septicemia                                                                                                                                                                                                                                                                                                                                                                                                                         | GNB    |
| 26 | Pena C <sup>60</sup>         | 1993-1995 | Spain        | Cohort study, prospective   | Non-ESBL-infection                                                                 | All kinds of patients | Entire hospital    | Attributable mortality, all-cause mortality      | Clinical epidemiology& outcome of ESBL-KP- bacteraemia, relevance of ESBL strains in mortality of patients with hospital-acquired KP-BSI.                                                                                                                                                                                                                                                                                                                                                                         | KP     |
| 29 | Kola A <sup>61</sup>         | 2002-2004 | Germany      | Case cohort study           | Non-ESBL-infection                                                                 | All kinds of patients | Entire hospital    | All-cause mortality, LOS, ICU-LOS                | Outcomes of ESBL-EC- and ESBL-KP-infections                                                                                                                                                                                                                                                                                                                                                                                                                                                                       | EC, KP |
| 32 | Isai MH <sup>62</sup>        | 2001-2012 | Taiwan       | Case cohort study           | Control group: non-ESBL-infection, second control group: all hospitalised patients | Neonates at NICU      | NICU               | Attributable mortality, all-cause mortality, LOS | Clinical features& risk factors& molecular epidemiology of ESBL-GNB                                                                                                                                                                                                                                                                                                                                                                                                                                               | GNB    |
| 36 | Maslikowska JA <sup>63</sup> | 2010-2013 | Canada       | Case cohort study           | Non-ESBL-infection                                                                 | All kinds of patients | Entire hospital    | Attributable mortality, all-cause mortality, LOS | Differences in clinical & microbiological outcome, mortality, and/or hospital resource use: ESBL-EC- and ESBL-Ks- vs non-ESBL-EC- and non-ESBL-Ks-infections                                                                                                                                                                                                                                                                                                                                                      | GNB    |

1  
2  
3  
4  
5  
6  
7  
8  
9  
10  
11  
12  
13  
14  
15  
16  
17  
18  
19  
20  
21  
22  
23  
24  
25  
26  
27  
28  
29  
30  
31  
32  
33  
34  
35  
36  
37  
38  
39  
40  
41  
42  
43  
44  
45  
46

|                               | Years     | Country                 | Study design                | Control group                                                            | Study population      | Setting          | Outcome definition                                        | Main objective                                                                                                                                                                                     | Pathogen |
|-------------------------------|-----------|-------------------------|-----------------------------|--------------------------------------------------------------------------|-----------------------|------------------|-----------------------------------------------------------|----------------------------------------------------------------------------------------------------------------------------------------------------------------------------------------------------|----------|
| Onken A <sup>64</sup>         | 2012-2013 | Tanzania                | Cohort study, prospective   | Non-ESBL-infection                                                       | All kinds of patients | Entire hospital  | All-cause mortality                                       | Most common bacterial pathogens causing BSI, antimicrobial susceptibility                                                                                                                          | GNB      |
| Nguyen ML <sup>65</sup>       | 2005-2010 | Canada                  | Case cohort study           | Non-ESBL-infection                                                       | All kinds of patients | Entire hospital  | All-cause mortality, LOS, ICU-LOS                         | Risk factors for & patient outcomes associated with ESBL-EC- and ESBL-Ks- bacteraemia, appropriateness of empiric antibiotic therapy & effect of inappropriate empiric therapy on outcomes         | GNB      |
| Denis B <sup>66</sup>         | 2005-2009 | France                  | Case-control study          | Non-ESBL-infection                                                       | All kinds of patients | Entire hospital  | All-cause mortality (28 day), LOS                         | Prevalence & risk factors for ESBL-EC bacteraemia, impact on length of stay & 30day mortality                                                                                                      | EC       |
| Chopra T <sup>67</sup>        | 2004-2009 | USA                     | Case cohort study           | Case 2(Control1): non-ESBL-infection, second control group: no infection | All kinds of patients | Entire hospital  | All-cause mortality (28 day)                              | Predictors of ESBL-EC- and ESBL-KP-BSI, focus on cefepime exposure.                                                                                                                                | EC, KP   |
| Panhotra BR <sup>18</sup>     | 2001-2003 | Kingdom of Saudi Arabia | Case cohort study           | Non-ESBL-infection                                                       | All kinds of patients | Entire hospital  | All-cause mortality                                       | Risk factors & clinical outcome of ESBL-KP-bacteraemia (hospital acquired)                                                                                                                         | KP       |
| Marra AR <sup>19</sup>        | 1996-2001 | Brazil                  | Cohort study, retrospective | Non-ESBL-infection                                                       | All kinds of patients | Entire hospital  | All-cause mortality (14 day)                              | ESBL-KP- associated mortality                                                                                                                                                                      | KP       |
| Skippen I <sup>20</sup>       | 2003-2005 | UK                      | Case cohort study           | Non-ESBL-infection                                                       | All kinds of patients | Entire hospital  | All-cause mortality                                       | Risk factors for & outcomes of ESBL-EC- and ESBL-KP-invasive transmission of organism in the healthcare setting                                                                                    | GNB      |
| Schwaber MJ <sup>21</sup>     | 2000-2003 | Israel                  | Cohort study, retrospective | Non-ESBL-infection                                                       | All kinds of patients | Entire hospital  | Attributable mortality, all-cause mortality               | Outcomes of ESBL-production in Enterobacteriaceae-bacteraemia.                                                                                                                                     | GNB      |
| Apisarntharak A <sup>22</sup> | 2003-2004 | Thailand                | Case cohort study           | Control group: non-ESBL-infection, second control group: no infection    | All adult patients    | Entire hospital  | All-cause mortality, LOS                                  | Clinical & molecular epidemiologic factors associated with community onset ESBL-EC- infections, hospital resource utilisation, estimate costs associated with medical care (hospitalised patients) | EC       |
| Umbarello M <sup>23</sup>     | 1999-2003 | Italy                   | Case cohort study           | Non-ESBL-infection                                                       | All kinds of patients | Entire hospital  | Attributable mortality, all-cause mortality, LOS, ICU-LOS | Factors associated with isolation of ESBL- KP-strains                                                                                                                                              | KP       |
| Zeistner R <sup>9</sup>       | 2008-2010 | Germany                 | Cohort study, retrospective | Non-ESBL-infection                                                       | All kinds of patients | Entire hospital, | All-cause mortality, LOS                                  | Difference in mortality: ESBL-EC-BSIs vs. non-ESBL-EC-BSIs, molecular epidemiology of ESBL-positive isolates                                                                                       | EC       |



|                                                                                                                                                                                                                                                                         | Years     | Country     | Study design                | Control group                                                         | Study population                                | Setting                       | Outcome definition                | Main objective                                                                                                                                                                                                                                                            | Pathogen |
|-------------------------------------------------------------------------------------------------------------------------------------------------------------------------------------------------------------------------------------------------------------------------|-----------|-------------|-----------------------------|-----------------------------------------------------------------------|-------------------------------------------------|-------------------------------|-----------------------------------|---------------------------------------------------------------------------------------------------------------------------------------------------------------------------------------------------------------------------------------------------------------------------|----------|
| 1<br>2<br>3<br>4<br>5<br>6<br>7<br>8<br>9<br>10<br>11<br>12<br>13<br>14<br>15<br>16<br>17<br>18<br>19<br>20<br>21<br>22<br>23<br>24<br>25<br>26<br>27<br>28<br>29<br>30<br>31<br>32<br>33<br>34<br>35<br>36<br>37<br>38<br>39<br>40<br>41<br>42<br>43<br>44<br>45<br>46 | 2003-2004 | Thailand    | Case cohort study           | Control group: non-ESBL-infection, second control group: no infection | All kinds of patients                           | Entire hospital               | All-cause mortality, LOS          | Risk factors for & outcomes of ESBL-EC- and ESBL-KP-infections (healthcare associated)                                                                                                                                                                                    | EC, KP   |
|                                                                                                                                                                                                                                                                         | 2003      | Lebanon     | Case cohort study           | Non-ESBL-infection                                                    | All kinds of patients                           | Entire hospital               | All-cause mortality, LOS          | Epidemiology of infections with ESBL-EC and ESBL-Ks at AUBMC risk factors & outcomes of infections - focus on effect of prior antibiotic administration & the risks imparted by specific classes of antimicrobial agents                                                  | GNB      |
|                                                                                                                                                                                                                                                                         | 1999-2003 | USA         | Case cohort study           | Non-ESBL-infection                                                    | Children                                        | Entire hospital               | All-cause mortality, LOS          | Risk factors & outcomes associated with ESBL-EC-and ESBL-KP-BSI                                                                                                                                                                                                           | EC, KP   |
|                                                                                                                                                                                                                                                                         | 2003-2004 | Malaysia    | Cohort study, retrospective | Non-ESBL-infection                                                    | All kinds of patients                           | Entire hospital               | All-cause mortality, LOS          | Impact of ESBL-KP-respiratory tract infections on hospital mortality, requirement for mechanical ventilation & length stay                                                                                                                                                | KP       |
|                                                                                                                                                                                                                                                                         | 2003-2005 | UK          | Cohort study, prospective   | Non-ESBL-infection                                                    | All kinds of patients                           | Entire hospital               | All-cause mortality               | Differences in mortality & length of hospital stay & time from bacteraemia to death in patients with ESBL-EC- vs. non-ESBL-EC-bacteremic-infection                                                                                                                        | EC       |
|                                                                                                                                                                                                                                                                         | 2000-2006 | South Korea | Case cohort study           | Non-ESBL-infection                                                    | Patients with spontaneous bacterial peritonitis | Not provided                  | All-cause mortality (28 day)      | Outcomes of ESBL-EC-and ESBL-Ks- vs non-ESBL-EC-and ESBL-Ks-SBP (based on isolation from ascites), impact of ineffective initial antimicrobial therapy on outcome in patients with ESBL-EC- and ESBL-Ks-SBP, risk factors for infection by ESBL-producing microorganisms. | GNB      |
|                                                                                                                                                                                                                                                                         | 2004-2008 | USA         | Cohort study, prospective   | Non-ESBL-infection                                                    | ICU-patients                                    | ICU, Surgical ward, Burn unit | All-cause mortality (28 day)      | ESBL types and strain variability, presence of host factors to determine potential role in morbidity and mortality during ESBL-KP-infections                                                                                                                              | KP       |
|                                                                                                                                                                                                                                                                         | 2000-2007 | Italy       | Cohort study, retrospective | Non-ESBL-infection                                                    | Patients with hematological malignancies        | Entire hospital               | All-cause mortality (28 day)      | Risk factors for mortality in patients suffering from hematological malignancies with concurrent EC-bacteraemia. Focus on impact of ESBL- production & fluoroquinolone resistance by bacterial isolates                                                                   | EC       |
|                                                                                                                                                                                                                                                                         | 2006-2009 | Brazil      | Cohort study, retrospective | Non-ESBL-infection                                                    | All kinds of patients                           | Entire hospital               | All-cause mortality (28 day), LOS | Risk factors & mortality rate in ESBL-KP-bacteraemia                                                                                                                                                                                                                      | KP       |
|                                                                                                                                                                                                                                                                         | 2008-2009 | South Korea | Cohort study, retrospective | Non-ESBL-infection                                                    | All kinds of patients                           | Entire hospital               | All-cause mortality (28 day)      | Risk factors of ESBL-EC among community-onset bacteraemia, treatment outcomes                                                                                                                                                                                             | EC       |

1  
2  
3  
4  
5  
6  
7  
8  
9  
10  
11  
12  
13  
14  
15  
16  
17  
18  
19  
20  
21  
22  
23  
24  
25  
26  
27  
28  
29  
30  
31  
32  
33  
34  
35  
36  
37  
38  
39  
40  
41  
42  
43  
44  
45  
46

|                                | Years     | Country     | Study design                | Control group      | Study population                  | Setting                                           | Outcome definition                                                 | Main objective                                                                                                                                                                                                          | Pathogen |
|--------------------------------|-----------|-------------|-----------------------------|--------------------|-----------------------------------|---------------------------------------------------|--------------------------------------------------------------------|-------------------------------------------------------------------------------------------------------------------------------------------------------------------------------------------------------------------------|----------|
| Pena C <sup>34</sup>           | 1996-2003 | Spain       | Cohort study, retrospective | Non-ESBL-infection | All kinds of patients             | Entire hospital                                   | All-cause mortality (28 day)                                       | Risk factors for mortality among patients with EC- infections                                                                                                                                                           | EC       |
| Tumbarello M <sup>35</sup>     | 2006      | Italy       | Cohort study, retrospective | Non-ESBL-infection | All kinds of patients             | ICU, Medical ward, Entire hospital, surgical wide | All-cause mortality (21 day), LOS                                  | Clinical & economic impacts of ESBL production, inadequate Initial Antibiotic Therapy of EC-BSI                                                                                                                         | EC       |
| Kang C <sup>36</sup>           | 2006-2009 | South Korea | Case cohort study           | Non-ESBL-infection | All kinds of patients             | Entire hospital                                   | Attributable mortality, all-cause mortality (28 day)               | Impact of ESBL-producing bacteraemia on outcome in patients with hematologic malignancy.                                                                                                                                | EC, KP   |
| Wu YH <sup>37</sup>            | 2009-2012 | Taiwan      | Cohort study, prospective   | Non-ESBL-infection | All kinds of patients             | Medical ward                                      | LOS                                                                | Host-related risk factors for community-onset UTI due to levofloxacin- or cefazolin-nonsusceptible isolates or uropathogens with ESBL production, clinical impact of UTIs due to antimicrobial-nonsusceptible pathogens | GNB      |
| Rodriguez-Bano J <sup>38</sup> | 2004-2006 | Spain       | Case cohort study           | Non-ESBL-infection | All kinds of patients             | Entire hospital                                   | All-cause mortality (14 day)                                       | Epidemiology & risk factors (focus on previous antimicrobial use) & mortality rate for patients with ESBL-EC-COBSI                                                                                                      | EC       |
| Gürttnke S <sup>39</sup>       | 2008-2011 | Germany     | Cohort study, retrospective | Non-ESBL-infection | All kinds of patients             | Entire hospital                                   | All-cause mortality, LOS                                           | Distribution of ESBL genotypes, hospital mortality in cases of ESBL-KP-BSI                                                                                                                                              | KP       |
| Oh MM <sup>40</sup>            | 2006-2011 | South Korea | Cohort study, retrospective | Non-ESBL-infection | Patients after Prostatitis Biopsy | Entire hospital                                   | LOS                                                                | Impact of ESBL-positive-strains on clinical course & progression to chronic prostatitis in patients with postbiopsy acute prostatitis.                                                                                  | GNB      |
| Leistner R <sup>41</sup>       | 2008-2011 | Germany     | Cohort study, retrospective | Non-ESBL-infection | All kinds of patients             | Entire hospital                                   | All-cause mortality, LOS                                           | Financial disease burden attributable to ESBL-positive species in cases of EC-and KP-BSI                                                                                                                                | EC, KP   |
| Lin JN <sup>40</sup>           | 2005-2009 | Taiwan      | Case cohort study           | Non-ESBL-infection | All kinds of patients             | Emergency Room                                    | Attributable mortality, all-cause mortality (28 day), LOS, ICU-LOS | Clinical & microbiological characteristics, risk factors for acquisition of infection, prescription of initial empirical antibiotics mortality rate of infection                                                        | GNB      |
| Yu NS <sup>42</sup>            | 2006-2010 | South Korea | Case cohort study           | Non-ESBL-infection | All kinds of patients             | Entire hospital                                   | All-cause mortality (28 day)                                       | Clinical usefulness of breakpoints for treatment of Enterobacteriaceae-bacteraemia, (focus on EC- and Ks-bacteraemia): CLSI 2009- vs. CLSI 2010-guidelines.                                                             | EC, KP   |

1  
2  
3  
4  
5  
6  
7  
8  
9  
10  
11  
12  
13  
14  
15  
16  
17  
18  
19  
20  
21  
22  
23  
24  
25  
26  
27  
28  
29  
30  
31  
32  
33  
34  
35  
36  
37  
38  
39  
40  
41  
42  
43  
44  
45  
46

|                             | Years     | Country     | Study design                | Control group                                                         | Study population                                             | Setting         | Outcome definition                                   | Main objective                                                                                                                                                                                                                        | Pathogen |
|-----------------------------|-----------|-------------|-----------------------------|-----------------------------------------------------------------------|--------------------------------------------------------------|-----------------|------------------------------------------------------|---------------------------------------------------------------------------------------------------------------------------------------------------------------------------------------------------------------------------------------|----------|
| Anunnatsiri S <sup>43</sup> | 2005-2006 | Thailand    | Cohort study, retrospective | Non-ESBL-infection                                                    | All kinds of patients                                        | Entire hospital | All-cause mortality, LOS                             | Incidence of ESBL-EC-septicemia, factors associated with infection & clinical outcomes                                                                                                                                                | EC       |
| Kang CI <sup>44</sup>       | 1998-2002 | South Korea | Case cohort study           | Non-ESBL-infection                                                    | All kinds of patients                                        | Hospital-wide   | All-cause mortality (28 day)                         | Risk factors for mortality & treatment outcome of ESBL-EC- and ESBL-KP-BSI                                                                                                                                                            | EC, KP   |
| Raviv Y <sup>45</sup>       | 2004-2007 | Israel      | Cohort study, retrospective | Control group: non-ESBL-infection, second control group: no infection | patients with lung transplantation                           | Not provided    | All-cause mortality (28 day)                         | Outcomes of lung transplant recipients infected by CRKP and ESBL carbapenem-sensitive KP (referred to MDR-KP)                                                                                                                         | KP       |
| Kim HJ <sup>11</sup>        | 2005-2010 | South Korea | Cohort study, retrospective | Non-ESBL-infection                                                    | All kinds of patients                                        | Medical ward    | All-cause mortality (28 day), LOS                    | Clinical outcome of patients with biliary tract infection: ESBL-producing bacterial isolates vs. non-ESBL-producing-bacterial isolates, predictors of poor prognosis, impact of ineffective antimicrobial therapy on clinical outcome | EC, KP   |
| MacVane SH <sup>46</sup>    | 2011-2012 | USA         | Cohort study, retrospective | Non-ESBL-infection                                                    | All kinds of patients                                        | Entire hospital | Attributable mortality, all-cause mortality, LOS     | clinical & economic outcomes of patients with ESBL-EC- and ESBL-KP-UTI vs. non-ESBL-EC- and non-ESBL-KP-UTI                                                                                                                           | EC, KP   |
| Abhilash KP <sup>47</sup>   | 2007      | India       | Cohort study, prospective   | Non-ESBL-infection                                                    | All kinds of patients                                        | Entire hospital | All-cause mortality (14 day)                         | Prevalence & risk factors & outcome of antibiotic treatment among hospitalised patients with ESBL-EC- and ESBL-Ks-BSI                                                                                                                 | GNB      |
| Shanthi M <sup>48</sup>     | 2006      | India       | Cohort study, retrospective | Non-ESBL-infection                                                    | All kinds of patients                                        | Entire hospital | All-cause mortality, LOS                             | Prevalence & impact on clinical outcome of ESBL-production among nosocomial isolates of EC & KP                                                                                                                                       | EC, KP   |
| Han SB <sup>49</sup>        | 2009-2013 | South Korea | Cohort study, retrospective | Non-ESBL-infection                                                    | Children (immunocompromised, with cancer, neutropenic fever) | Pediatric ward  | Attributable mortality, all-cause mortality (28 day) | Clinical outcomes of ESBL-EC- and ESBL-KP-bacteraemia & their antibiotic susceptibilities                                                                                                                                             | EC, KP   |
| Lee S <sup>50</sup>         | 2009-2011 | South Korea | Cohort study, retrospective | Non-ESBL-infection                                                    | Patients with Acute Pyelonephritis                           | Entire hospital | All-cause mortality (14 day), LOS                    | Impact of ESBL on clinical outcomes of Acute Pyelonephritis treated with empirical ceftriaxone (which was inappropriate for ESBL-producing organisms)                                                                                 | EC       |
| Artero A <sup>68</sup>      | 2013-2015 | Spain       | Cohort study, prospective   | Non-ESBL-infection                                                    | Elderly                                                      | Medical ward    | All-cause mortality, LOS                             | Identify clinical factors to predict ESBL-EC among elderly patients with UTI admitted to hospital in a high rate setting of ESBL-EC                                                                                                   | EC       |

1  
2  
3  
4  
5  
6  
7  
8  
9  
10  
11  
12  
13  
14  
15  
16  
17  
18  
19  
20  
21  
22  
23  
24  
25  
26  
27  
28  
29  
30  
31  
32  
33  
34  
35  
36  
37  
38  
39  
40  
41  
42  
43  
44  
45  
46

|                                   | Years     | Country  | Study design                | Control group      | Study population                                                                                        | Setting                                      | Outcome definition                | Main objective                                                                                                                                                                                               | Pathogen         |
|-----------------------------------|-----------|----------|-----------------------------|--------------------|---------------------------------------------------------------------------------------------------------|----------------------------------------------|-----------------------------------|--------------------------------------------------------------------------------------------------------------------------------------------------------------------------------------------------------------|------------------|
| Chen IL <sup>69</sup>             | 2004-2015 | Taiwan   | Cohort study, retrospective | Non-ESBL-infection | Neonates                                                                                                | Neonatal ward                                | All-cause mortality               | Compare the clinical characteristics & laboratory data of preterm babies with EC BSI: survival vs. nonsurvival groups, ESBL vs non-ESBL groups, determine the predictive factors of EC BSI in preterm babies | EC               |
| Islas-Munoz B <sup>70</sup>       | 2016-2017 | Mexico   | Cohort study, prospective   | Non-ESBL-infection | Cancer patients                                                                                         | Oncologic ward                               | All-cause mortality (28 day)      | Evaluate the clinical epidemiological characteristics & risk factors associated with mortality in cancer patients with BSI-special emphasis on MDR bacteria                                                  | GNB (and others) |
| Ma J <sup>71</sup>                | 2012-2015 |          | Cohort study, retrospective | Non-ESBL-infection | Patients with hematological diseases                                                                    | Entire hospital                              | All-cause mortality (28 day)      | Evaluate the antimicrobial resistance & clinical features & risk factors for septic shock & death of nosocomial EC-BSI                                                                                       | EC               |
| Man MY <sup>72</sup>              | 2009-2016 | China    | Cohort study, retrospective | Non-ESBL-infection | All kinds of patients, except patients from Burn unit, transplant surgery ward or with thoracic therapy | Entire hospital                              | All-cause mortality (28 day)      | Evaluate the incidence & clinical characteristics & outcomes of patients with KP BSI in critical care & general ward settings                                                                                | KP               |
| Marando R <sup>73</sup>           | 2016      | Tanzania | Cohort study, prospective   | Non-ESBL-infection | Neonates                                                                                                | NICU                                         | All-cause mortality               | Investigate factors associated with ESBL-PE neonatal sepsis & mortality among neonates, characterise selected isolates to show virulence potential & transmission dynamics                                   | GNB              |
| Namikawa H <sup>74</sup>          | 2011-2015 | Japan    | Cohort study, retrospective | Non-ESBL-infection | All kinds of patients                                                                                   | Entire hospital                              | All-cause mortality               | Investigate clinical characteristics of patients with ESBL-EC-BSI                                                                                                                                            | EC               |
| Shi SH <sup>75</sup>              | 2008-2015 | China    | Cohort study, retrospective | Non-ESBL-infection | Patients with pyogenic liver abscess                                                                    | Centre for hepatopancreaticobiliary diseases | All-cause mortality, LOS          | Aetiology & morbidity & clinical characteristics of pyogenic liver abscess caused by ESBL-PE                                                                                                                 | GN               |
| Tanir Basaranoglu S <sup>76</sup> | 2011-2015 | Turkey   | Cohort study, retrospective | Non-ESBL-infection | Children                                                                                                | Pediatric ward                               | All-cause mortality (28 day)      | Assess risk factors for health care associated ESBL-KP-BSI in children, analyze clinical outcomes: ESBL-KP vs. non-ESBL-KP                                                                                   | KP               |
| Bazazi K <sup>77</sup>            | 2009-2015 | France   | Cohort study, prospective   | Non-ESBL-infection | ICU-patients                                                                                            | ICU                                          | All-cause mortality, LOS, ICU-LOS | Determine, among ESBL-PE carriers, the prevalence & associated factors & clinical impact of ESBL-PE pneumonia, determine factors associated with ICUAP caused by carbapenem-resistant bacteria               | GNB              |

1  
2  
3  
4  
5  
6  
7  
8  
9  
10  
11  
12  
13  
14  
15  
16  
17  
18  
19  
20  
21  
22  
23  
24  
25  
26  
27  
28  
29  
30  
31  
32  
33  
34  
35  
36  
37  
38  
39  
40  
41  
42  
43  
44  
45  
46

|                            | Years     | Country      | Study design                | Control group                                                         | Study population      | Setting              | Outcome definition                                                 | Main objective                                                                                                                                                                                                       | Pathogen |
|----------------------------|-----------|--------------|-----------------------------|-----------------------------------------------------------------------|-----------------------|----------------------|--------------------------------------------------------------------|----------------------------------------------------------------------------------------------------------------------------------------------------------------------------------------------------------------------|----------|
| Ray S <sup>78</sup>        | 2014-2016 | India        | Cohort study, prospective   | Non-ESBL-infection                                                    | ICU-patients          | ICU                  | All-cause mortality                                                | Investigate spectrum of microbial resistance pattern in the community and their effects on mortality                                                                                                                 | GNB      |
| Haruki Y <sup>79</sup>     | 2006-2016 | Japan        | Cohort study, retrospective | Non-ESBL-infection                                                    | ICU-patients          | ICU                  | All-cause mortality                                                | Compare the clinical characteristics & outcomes of critically ill patients in an ICU, who were hospitalised for BSI caused by ESBL-EC or non-ESBL-EC.                                                                | GNB      |
| Lin WT <sup>80</sup>       | 2009-2014 | Taiwan       | Cohort study, retrospective | Non-ESBL-infection                                                    | All kinds of patients | Entire hospital      | All-cause mortality                                                | Investigate the clinical manifestations & bacteriological features of culture-proven, GNB arthritis                                                                                                                  | GNB      |
| Guys H <sup>81</sup>       | 2006-2011 | South Africa | Cohort study, retrospective | Non-ESBL-infection                                                    | Children              | Pediatric ward       | All-cause mortality                                                | Describe the clinical presentation of KPBSI, risk factors associated with ESBL-KPBSI, antibiotic susceptibility patterns of the KP isolates & KPBSI mortality including factors associated with in-patient mortality | KP       |
| Lee CC <sup>82</sup>       | 2008-2013 | Taiwan       | Cohort study, retrospective | Non-ESBL-infection                                                    | All kinds of patients | Emergency Department | Attributable mortality, all-cause mortality (28 day), LOS, ICU-LOS | Analyse the impact of ESBL-producing isolates on the outcome of bacteremic patient after controlling for baseline patient characteristics & bacteraemia severity by using a propensity-matched analysis (PSM)        | GNB      |
| Huang YY <sup>83</sup>     | 2011-2013 | Canada       | Case cohort study           | Non-ESBL-infection                                                    | All kinds of patients | Entire hospital      | All-cause mortality, LOS                                           | Determine cumulative incidence of ESBL urosepsis, identify major risk factors for ESBL urosepsis, determine impact of international travel on development of ESBL urosepsis                                          | EC, KP   |
| Komatsu Y <sup>84</sup>    | 2008-2013 | Japan        | Case cohort study           | Non-ESBL-infection                                                    | All kinds of patients | Entire hospital      | All-cause mortality (14 day)                                       | Identify risk factors & clinical outcomes in patients with BSI due to ESBL- or carbapenemase-producing EC, determine prevalence & genetic background                                                                 | EC       |
| Liu MM <sup>85</sup>       | 2011-2016 | China        | Case cohort study           | Control group: non-ESBL-infection, second control group: no infection | ICU-patients          | ICU                  | All-cause mortality                                                | Identify risk factors for ESBL-producing ECBSI among carriers at ICU                                                                                                                                                 | EC       |
| Nivesvivat T <sup>86</sup> | 2010-2017 | Thailand     | Cohort study, retrospective | Non-ESBL-infection                                                    | Children              | Pediatric ward       | All-cause mortality, LOS                                           | Determine prevalence, risk factors & clinical outcomes of ESBL-producing EB in paediatric BSI                                                                                                                        | EC, KP   |

1  
2  
3  
4  
5  
6  
7  
8  
9  
10  
11  
12  
13  
14  
15  
16  
17  
18  
19  
20  
21  
22  
23  
24  
25  
26  
27  
28  
29  
30  
31  
32  
33  
34  
35  
36  
37  
38  
39  
40  
41  
42  
43  
44  
45  
46

|                          | Years     | Country | Study design                | Control group      | Study population                                                | Setting         | Outcome definition                           | Main objective                                                                                                                                                                                                                                                                                                                                                                            | Pathogen |
|--------------------------|-----------|---------|-----------------------------|--------------------|-----------------------------------------------------------------|-----------------|----------------------------------------------|-------------------------------------------------------------------------------------------------------------------------------------------------------------------------------------------------------------------------------------------------------------------------------------------------------------------------------------------------------------------------------------------|----------|
| Cordery RJ <sup>87</sup> | 2004-2006 | UK      | Cohort study, retrospective | Non-ESBL-infection | ICU-patients                                                    | ICU             | All-cause mortality                          | Elucidate specific risk factors for the acquisition of ESBL infection in the ICU; all-cause mortality (in ICU) compared in patients with infections due to ESBL- and non-ESBL-producing organisms                                                                                                                                                                                         | GNB      |
| Paikos GL <sup>88</sup>  | 2003-2005 | Greece  | Cohort study, prospective   | Non-ESBL-infection | All kinds of patients                                           | Entire hospital | All-cause mortality                          | Identify risk factors associated BSI caused by integron-carrying EB; evaluate the consequences of these genetic elements on patient outcome                                                                                                                                                                                                                                               | GNB      |
| Gudiol C <sup>89</sup>   | 2006-2008 | Spain   | Cohort study, prospective   | Non-ESBL-infection | Cancer patients and hematopoietic stem cell transplant patients | Entire hospital | All-cause mortality                          | Assess clinical features, risk factors, molecular epidemiology & outcome of ESBLEC BSI in hospitalised cancer patients                                                                                                                                                                                                                                                                    | EC       |
| Marchaim D <sup>90</sup> | 2006-2008 | Israel  | Cohort study, prospective   | Non-ESBL-infection | All kinds of patients                                           | Entire hospital | All-cause mortality, LOS                     | Define predictors & outcomes of ESBL BSI among patients with bacteraemia due to EB upon hospital admission                                                                                                                                                                                                                                                                                | GNB      |
| Menashe G <sup>91</sup>  | 1997      | Israel  | Cohort study, retrospective | Non-ESBL-infection | All kinds of patients                                           | Entire hospital | All-cause mortality                          | Determine: prevalence of ESBL-P organisms among adult patients with nosocomial EB BSI treated in our institution; association between ESBL production & resistance to other antibiotics; clinical characteristics of patients with nosocomial ESBL-P BSI compared with those infected with non-producing strains; impact of ESBL production on outcome of patients with nosocomial EB BSI | GNB      |
| Ortega M <sup>92</sup>   | 1991-2007 | Spain   | Cohort study, prospective   | Non-ESBL-infection | All kinds of patients                                           | Entire hospital | All-cause mortality                          | Describe source, resistance rate to fluoroquinolone & beta-lactam antibiotics and mortality of EC BSI episodes in a single institution; identify predictive factors for isolation of fluoroquinolone-resistant or ESBL- producing strains.                                                                                                                                                | EC       |
| Sziglyi M <sup>93</sup>  | 2005-2008 | Hungary | Cohort study, retrospective | Non-ESBL-infection | All kinds of patients                                           | Entire hospital | Attributable mortality, all-cause mortality, | Investigate risk factors for & outcomes of BSI caused by ESBL-producing and ESBL-non-producing KP                                                                                                                                                                                                                                                                                         | KP       |
| Tsai SS <sup>94</sup>    | 2005-2006 | Taiwan  | Cohort study, retrospective | Non-ESBL-infection | Diabetic patients                                               | Entire hospital | All-cause mortality                          | Analyze characteristics, risk factors & outcomes of diabetic patients with community- vs. hospital-acquired KP BSI                                                                                                                                                                                                                                                                        | KP       |

1  
2  
3  
4  
5  
6  
7  
8  
9  
10  
11  
12  
13  
14  
15  
16  
17  
18  
19  
20  
21  
22  
23  
24  
25  
26  
27  
28  
29  
30  
31  
32  
33  
34  
35  
36  
37  
38  
39  
40  
41  
42  
43  
44  
45  
46

EC = *Escherichia coli*  
KP = *Klebsiella pneumoniae*  
GNB = Gram-negative bacteria  
BSI = Bloodstream infection  
UTI = Urinary tract infection  
ICU = Intensive care unit  
NICU = Neonatal intensive care unit  
ESBL-PE = Extended-spectrum beta-lactamase-producing Enterobacteriaceae  
EB = Enterobacteriaceae  
LOS = Length of stay

For peer review only

**Supplementary table S5: Risk of bias assessment of case cohort studies according to Newcastle - Ottawa quality assessment scale:**

| Assessment criteria / Study author | 1. Is the case definition adequate? | 2. Representativeness of the cases: | 3. Selection of Controls | 4. Definition of Controls | 5. Comparability of cases and controls on the basis of the design or analysis | 6. Ascertainment of exposure | 7. Same method of ascertainment for cases and controls | 8. Non-Response rate |
|------------------------------------|-------------------------------------|-------------------------------------|--------------------------|---------------------------|-------------------------------------------------------------------------------|------------------------------|--------------------------------------------------------|----------------------|
| Lautenbach, E.                     | Green                               | Green                               | Yellow                   | Yellow                    | Green                                                                         | Green                        | Green                                                  | Green                |
| Apisarntharak, A.                  | Green                               | Green                               | Yellow                   | Green                     | Green                                                                         | Green                        | Green                                                  | Green                |
| Briongos-Figuero, L-S.             | Green                               | Green                               | Yellow                   | Yellow                    | Grey                                                                          | Green                        | Green                                                  | Green                |
| Stone, P.W.                        | Green                               | Green                               | Brown                    | Yellow                    | Grey                                                                          | Green                        | Green                                                  | Green                |
| Kola, A.                           | Green                               | Green                               | Yellow                   | Yellow                    | Green                                                                         | Green                        | Green                                                  | Green                |
| Tsai, M.H.                         | Green                               | Green                               | Yellow                   | Yellow                    | Yellow                                                                        | Green                        | Green                                                  | Green                |
| Maslikowska, J.A.                  | Green                               | Green                               | Yellow                   | Yellow                    | Green                                                                         | Green                        | Green                                                  | Green                |
| Nguyen, M. L.                      | Green                               | Green                               | Yellow                   | Yellow                    | Yellow                                                                        | Green                        | Green                                                  | Green                |
| Denis, B.                          | Green                               | Green                               | Yellow                   | Green                     | Yellow                                                                        | Green                        | Green                                                  | Green                |
| Chopra, T.                         | Green                               | Green                               | Yellow                   | Yellow                    | Green                                                                         | Green                        | Green                                                  | Green                |
| Skippen, I.                        | Green                               | Green                               | Yellow                   | Yellow                    | Yellow                                                                        | Green                        | Grey                                                   | Green                |
| Apisarntharak, A.                  | Green                               | Green                               | Yellow                   | Yellow                    | Yellow                                                                        | Green                        | Green                                                  | Green                |
| Tumbarello, M.                     | Green                               | Green                               | Yellow                   | Yellow                    | Green                                                                         | Green                        | Green                                                  | Green                |
| Apisarntharak, A.                  | Green                               | Green                               | Yellow                   | Yellow                    | Green                                                                         | Green                        | Green                                                  | Green                |
| Kanafani, Z. A.                    | Green                               | Green                               | Yellow                   | Yellow                    | Green                                                                         | Green                        | Green                                                  | Green                |
| Zaoutis, T. E.                     | Green                               | Green                               | Yellow                   | Yellow                    | Yellow                                                                        | Green                        | Green                                                  | Green                |
| Song, K. H.                        | Green                               | Green                               | Yellow                   | Yellow                    | Green                                                                         | Green                        | Green                                                  | Green                |
| Kang, C. I.                        | Green                               | Green                               | Yellow                   | Yellow                    | Grey                                                                          | Green                        | Green                                                  | Green                |
| Rodriguez-Bano, J.                 | Green                               | Green                               | Yellow                   | Yellow                    | Yellow                                                                        | Green                        | Green                                                  | Green                |
| Lin, J. N.                         | Green                               | Green                               | Yellow                   | Yellow                    | Green                                                                         | Green                        | Green                                                  | Green                |
| Ku, N. S.                          | Green                               | Green                               | Yellow                   | Yellow                    | Green                                                                         | Green                        | Green                                                  | Green                |
| Kang, C. I.                        | Green                               | Green                               | Yellow                   | Yellow                    | Green                                                                         | Green                        | Green                                                  | Green                |
| Huang, Y. Y.                       | Green                               | Green                               | Yellow                   | Yellow                    | Yellow                                                                        | Green                        | Green                                                  | Green                |
| Komatsu, Y.                        | Green                               | Green                               | Yellow                   | Yellow                    | Yellow                                                                        | Green                        | Green                                                  | Green                |
| Liu, M. M.                         | Green                               | Green                               | Yellow                   | Green                     | Yellow                                                                        | Green                        | Green                                                  | Green                |



## Risk of bias assessment of cohort studies according to Newcastle - Ottawa quality assessment scale:

| Study author / Assessment criteria | 1. Representativeness of exposed cohort | 2. Selection of non-exposed cohort | 3. Ascertainment of exposure | 4. Demonstration that outcome of interest not present at start | 5. Comparability based on design or analysis | 6. Assessment of outcome | 7. Follow-up long enough for outcome | 8. Adequacy of follow up of cohorts |
|------------------------------------|-----------------------------------------|------------------------------------|------------------------------|----------------------------------------------------------------|----------------------------------------------|--------------------------|--------------------------------------|-------------------------------------|
| Jean, S.S.                         | Yellow                                  | Green                              | Green                        | Green                                                          | Green                                        | Yellow                   | Green                                | Green                               |
| Bhavnani, S. M.                    | Green                                   | Green                              | Green                        | Green                                                          | Yellow                                       | Yellow                   | Green                                | Green                               |
| Blomberg, B.                       | Yellow                                  | Green                              | Green                        | Green                                                          | Grey                                         | Yellow                   | Green                                | Green                               |
| Pena, C.                           | Green                                   | Green                              | Green                        | Green                                                          | Yellow                                       | Yellow                   | Green                                | Green                               |
| Onken, A.                          | Green                                   | Green                              | Green                        | Green                                                          | Grey                                         | Yellow                   | Green                                | Green                               |
| Melzer, M.                         | Green                                   | Green                              | Green                        | Green                                                          | Grey                                         | Yellow                   | Green                                | Green                               |
| Bennet, J.                         | Green                                   | Green                              | Green                        | Green                                                          | Yellow                                       | Yellow                   | Green                                | Green                               |
| Wu, Y.                             | Yellow                                  | Green                              | Green                        | Green                                                          | Yellow                                       | Yellow                   | Green                                | Green                               |
| Abhilash, K.                       | Green                                   | Green                              | Green                        | Green                                                          | Green                                        | Yellow                   | Yellow                               | Green                               |
| Artero, A.                         | Yellow                                  | Green                              | Green                        | Green                                                          | Yellow                                       | Yellow                   | Green                                | Green                               |
| Islas-Munos, B.                    | Green                                   | Green                              | Green                        | Green                                                          | Yellow                                       | Yellow                   | Green                                | Green                               |
| Marando, R.                        | Green                                   | Green                              | Green                        | Green                                                          | Yellow                                       | Yellow                   | Green                                | Green                               |
| Razazi, K.                         | Green                                   | Green                              | Green                        | Green                                                          | Yellow                                       | Yellow                   | Green                                | Green                               |
| Ray, S.                            | Green                                   | Green                              | Green                        | Green                                                          | Yellow                                       | Yellow                   | Green                                | Green                               |
| Panhotra, B.                       | Green                                   | Green                              | Green                        | Green                                                          | Yellow                                       | Yellow                   | Green                                | Green                               |
| Kim, S.                            | Green                                   | Green                              | Green                        | Green                                                          | Yellow                                       | Yellow                   | Green                                | Green                               |
| Chayakulkeeree, M.                 | Green                                   | Green                              | Green                        | Green                                                          | Yellow                                       | Yellow                   | Green                                | Green                               |
| Apisarnthanarak, A.                | Yellow                                  | Green                              | Green                        | Green                                                          | Yellow                                       | Yellow                   | Green                                | Green                               |
| Ha, Y.                             | Yellow                                  | Green                              | Green                        | Green                                                          | Yellow                                       | Yellow                   | Green                                | Green                               |
| Du, B                              | Green                                   | Green                              | Green                        | Green                                                          | Yellow                                       | Yellow                   | Green                                | Green                               |
| Pillay, T.                         | Yellow                                  | Green                              | Green                        | Green                                                          | Grey                                         | Yellow                   | Green                                | Green                               |
| Kim, B.                            | Green                                   | Green                              | Green                        | Green                                                          | Yellow                                       | Yellow                   | Green                                | Green                               |
| Kim, Y                             | Green                                   | Green                              | Green                        | Green                                                          | Yellow                                       | Yellow                   | Green                                | Green                               |
| Marra, A.                          | Green                                   | Green                              | Green                        | Green                                                          | Yellow                                       | Yellow                   | Green                                | Green                               |
| Schwaber, M.                       | Yellow                                  | Green                              | Green                        | Green                                                          | Yellow                                       | Yellow                   | Green                                | Green                               |
| Leistner, R.                       | Green                                   | Green                              | Green                        | Green                                                          | Yellow                                       | Yellow                   | Green                                | Green                               |
| Loh, L.C.                          | Green                                   | Green                              | Green                        | Green                                                          | Green                                        | Yellow                   | Green                                | Red                                 |
| Trecarichi, E.                     | Yellow                                  | Green                              | Green                        | Green                                                          | Yellow                                       | Yellow                   | Green                                | Green                               |
| Tuon, F.                           | Green                                   | Green                              | Green                        | Green                                                          | Yellow                                       | Yellow                   | Green                                | Green                               |
| Kang, C. I.                        | Yellow                                  | Green                              | Green                        | Green                                                          | Yellow                                       | Yellow                   | Green                                | Green                               |
| Pena, C.                           | Green                                   | Green                              | Green                        | Green                                                          | Grey                                         | Yellow                   | Green                                | Green                               |
| Tumbarello, M.                     | Yellow                                  | Green                              | Green                        | Green                                                          | Yellow                                       | Yellow                   | Green                                | Green                               |
| Gurntke, S.                        | Green                                   | Green                              | Green                        | Green                                                          | Yellow                                       | Yellow                   | Green                                | Green                               |
| Oh, M.                             | Yellow                                  | Green                              | Green                        | Green                                                          | Yellow                                       | Yellow                   | Green                                | Green                               |
| Leistner, R.                       | Green                                   | Green                              | Green                        | Green                                                          | Grey                                         | Yellow                   | Green                                | Green                               |
| Anunnatsiri                        | Yellow                                  | Green                              | Green                        | Green                                                          | Yellow                                       | Yellow                   | Green                                | Green                               |

|    |                       |        |       |       |       |        |        |       |       |
|----|-----------------------|--------|-------|-------|-------|--------|--------|-------|-------|
| 1  | Raviv, Y.             | Yellow | Green | Green | Green | Yellow | Yellow | Green | Green |
| 2  | Kim, H.J.             | Yellow | Green | Green | Green | Green  | Yellow | Green | Green |
| 3  | MacVane, S.           | Yellow | Green | Green | Green | Green  | Yellow | Green | Green |
| 4  | Shanthi               | Yellow | Green | Green | Green | Yellow | Yellow | Green | Green |
| 5  | Han, S.B.             | Yellow | Green | Green | Green | Green  | Yellow | Green | Green |
| 6  | Han, S.B.             | Yellow | Green | Green | Green | Green  | Yellow | Green | Green |
| 7  | Lee, S.               | Green  | Green | Green | Green | Yellow | Yellow | Green | Green |
| 8  | Chen, I-L.            | Green  | Green | Green | Green | Yellow | Yellow | Green | Green |
| 9  | Ma, J.                | Green  | Green | Green | Green | Green  | Yellow | Green | Green |
| 10 | Ma, J.                | Green  | Green | Green | Green | Green  | Yellow | Green | Green |
| 11 | Man, M.               | Yellow | Green | Green | Green | Yellow | Yellow | Green | Green |
| 12 | Namikawa, H.          | Yellow | Green | Green | Green | Yellow | Yellow | Green | Green |
| 13 | Namikawa, H.          | Yellow | Green | Green | Green | Yellow | Yellow | Green | Green |
| 14 | Shi, S.               | Yellow | Green | Green | Green | Grey   | Yellow | Green | Green |
| 15 | Tanir Basarangolu, S. | Yellow | Green | Green | Green | Yellow | Yellow | Green | Green |
| 16 | Tanir Basarangolu, S. | Yellow | Green | Green | Green | Yellow | Yellow | Green | Green |
| 17 | Haruki, Y.            | Yellow | Green | Green | Green | Green  | Yellow | Green | Green |
| 18 | Lin, W.               | Green  | Green | Green | Green | Grey   | Yellow | Green | Green |
| 19 | Lin, W.               | Green  | Green | Green | Green | Green  | Yellow | Green | Green |
| 20 | Buys, H.              | Green  | Green | Green | Green | Green  | Yellow | Green | Green |
| 21 | Lee, C.C.             | Yellow | Green | Green | Green | Green  | Yellow | Green | Green |
| 22 | Lee, C.C.             | Yellow | Green | Green | Green | Green  | Yellow | Green | Green |
| 23 | Nivesvivat, T.        | Yellow | Green | Green | Green | Green  | Yellow | Green | Green |
| 24 | Nivesvivat, T.        | Yellow | Green | Green | Green | Green  | Yellow | Green | Green |
| 25 |                       |        |       |       |       |        |        |       |       |
| 26 |                       |        |       |       |       |        |        |       |       |
| 27 |                       |        |       |       |       |        |        |       |       |
| 28 |                       |        |       |       |       |        |        |       |       |
| 29 |                       |        |       |       |       |        |        |       |       |
| 30 |                       |        |       |       |       |        |        |       |       |
| 31 |                       |        |       |       |       |        |        |       |       |
| 32 |                       |        |       |       |       |        |        |       |       |
| 33 |                       |        |       |       |       |        |        |       |       |
| 34 |                       |        |       |       |       |        |        |       |       |
| 35 |                       |        |       |       |       |        |        |       |       |
| 36 |                       |        |       |       |       |        |        |       |       |
| 37 |                       |        |       |       |       |        |        |       |       |
| 38 |                       |        |       |       |       |        |        |       |       |
| 39 |                       |        |       |       |       |        |        |       |       |
| 40 |                       |        |       |       |       |        |        |       |       |
| 41 |                       |        |       |       |       |        |        |       |       |
| 42 |                       |        |       |       |       |        |        |       |       |
| 43 |                       |        |       |       |       |        |        |       |       |
| 44 |                       |        |       |       |       |        |        |       |       |
| 45 |                       |        |       |       |       |        |        |       |       |
| 46 |                       |        |       |       |       |        |        |       |       |
| 47 |                       |        |       |       |       |        |        |       |       |
| 48 |                       |        |       |       |       |        |        |       |       |
| 49 |                       |        |       |       |       |        |        |       |       |
| 50 |                       |        |       |       |       |        |        |       |       |
| 51 |                       |        |       |       |       |        |        |       |       |
| 52 |                       |        |       |       |       |        |        |       |       |
| 53 |                       |        |       |       |       |        |        |       |       |
| 54 |                       |        |       |       |       |        |        |       |       |
| 55 |                       |        |       |       |       |        |        |       |       |
| 56 |                       |        |       |       |       |        |        |       |       |
| 57 |                       |        |       |       |       |        |        |       |       |
| 58 |                       |        |       |       |       |        |        |       |       |
| 59 |                       |        |       |       |       |        |        |       |       |
| 60 |                       |        |       |       |       |        |        |       |       |

For peer review only

**Supplementary table S6: Source of heterogeneity among effect estimates in studies on ESBL bloodstream infections in comparison with patients with non-ESBL bloodstream infections assessed using univariate meta-regression:**

| Subgroups / Outcome                  | All-cause mortality | Length of Stay |
|--------------------------------------|---------------------|----------------|
| Mortality time                       | 0.85                | -              |
| Pathogen                             | 0.45                | 0.34           |
| Study design                         | 0.51                | 0.21           |
| Study country                        | 0.22                | 0.09           |
| Income classification                | 0.17                | 0.80           |
| Study period                         | 0.57                | 0.78           |
| Study setting: ICU ward              | 0.78                | 0.97           |
| Study setting: Neonatal ward         | 0.62                | 0.97           |
| Study setting: Pediatric ward        | 0.96                | 0.96           |
| Study population: ICU patients       | 1.00                | -              |
| Study population: Children           | 0.96                | 0.96           |
| Study population: Neonates           | 0.62                | 0.97           |
| Information about therapy            | 0.53                |                |
| Appropriateness of therapy reported  | 0.68                |                |
| Information about outcome of therapy | 0.74                | -              |
| MIC reported                         | 0.28                | -              |

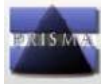

# PRISMA 2009 Checklist

| Section/topic                      | #  | Checklist item                                                                                                                                                                                                                                                                                              | Reported on page # |
|------------------------------------|----|-------------------------------------------------------------------------------------------------------------------------------------------------------------------------------------------------------------------------------------------------------------------------------------------------------------|--------------------|
| <b>TITLE</b>                       |    |                                                                                                                                                                                                                                                                                                             |                    |
| Title                              | 1  | Identify the report as a systematic review, meta-analysis, or both.                                                                                                                                                                                                                                         | 1                  |
| <b>ABSTRACT</b>                    |    |                                                                                                                                                                                                                                                                                                             |                    |
| Structured summary                 | 2  | Provide a structured summary including, as applicable: background; objectives; data sources; study eligibility criteria, participants, and interventions; study appraisal and synthesis methods; results; limitations; conclusions and implications of key findings; systematic review registration number. | 2                  |
| <b>INTRODUCTION</b>                |    |                                                                                                                                                                                                                                                                                                             |                    |
| Rationale                          | 3  | Describe the rationale for the review in the context of what is already known.                                                                                                                                                                                                                              | 4                  |
| Objectives                         | 4  | Provide an explicit statement of questions being addressed with reference to participants, interventions, comparisons, outcomes, and study design (PICOS).                                                                                                                                                  | 4                  |
| <b>METHODS</b>                     |    |                                                                                                                                                                                                                                                                                                             |                    |
| Protocol and registration          | 5  | Indicate if a review protocol exists, if and where it can be accessed (e.g., Web address), and, if available, provide registration information including registration number.                                                                                                                               | 6                  |
| Eligibility criteria               | 6  | Specify study characteristics (e.g., PICOS, length of follow-up) and report characteristics (e.g., years considered, language, publication status) used as criteria for eligibility, giving rationale.                                                                                                      | 5                  |
| Information sources                | 7  | Describe all information sources (e.g., databases with dates of coverage, contact with study authors to identify additional studies) in the search and date last searched.                                                                                                                                  | 4                  |
| Search                             | 8  | Present full electronic search strategy for at least one database, including any limits used, such that it could be repeated.                                                                                                                                                                               | 4                  |
| Study selection                    | 9  | State the process for selecting studies (i.e., screening, eligibility, included in systematic review, and, if applicable, included in the meta-analysis).                                                                                                                                                   | 5                  |
| Data collection process            | 10 | Describe method of data extraction from reports (e.g., piloted forms, independently, in duplicate) and any processes for obtaining and confirming data from investigators.                                                                                                                                  | 5                  |
| Data items                         | 11 | List and define all variables for which data were sought (e.g., PICOS, funding sources) and any assumptions and simplifications made.                                                                                                                                                                       | 5                  |
| Risk of bias in individual studies | 12 | Describe methods used for assessing risk of bias of individual studies (including specification of whether this was done at the study or outcome level), and how this information is to be used in any data synthesis.                                                                                      | 6                  |
| Summary measures                   | 13 | State the principal summary measures (e.g., risk ratio, difference in means).                                                                                                                                                                                                                               | 5                  |
| Synthesis of results               | 14 | Describe the methods of handling data and combining results of studies, if done, including measures of consistency (e.g., I <sup>2</sup> ) for each meta-analysis.                                                                                                                                          | 5,6                |

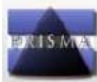

# PRISMA 2009 Checklist

1  
2  
3  
4  
5  
6  
7  
8  
9  
10  
11  
12  
13  
14  
15  
16  
17  
18  
19  
20  
21  
22  
23  
24  
25  
26  
27  
28  
29  
30  
31  
32  
33  
34  
35  
36  
37  
38  
39  
40  
41  
42  
43  
44  
45  
46  
47

| Section/topic                 | #  | Checklist item                                                                                                                                                                                           | Reported on page #    |
|-------------------------------|----|----------------------------------------------------------------------------------------------------------------------------------------------------------------------------------------------------------|-----------------------|
| Risk of bias across studies   | 15 | Specify any assessment of risk of bias that may affect the cumulative evidence (e.g., publication bias, selective reporting within studies).                                                             | 6                     |
| Additional analyses           | 16 | Describe methods of additional analyses (e.g., sensitivity or subgroup analyses, meta-regression), if done, indicating which were pre-specified.                                                         | 6                     |
| <b>RESULTS</b>                |    |                                                                                                                                                                                                          |                       |
| Study selection               | 17 | Give numbers of studies screened, assessed for eligibility, and included in the review, with reasons for exclusions at each stage, ideally with a flow diagram.                                          | 6                     |
| Study characteristics         | 18 | For each study, present characteristics for which data were extracted (e.g., study size, PICOS, follow-up period) and provide the citations.                                                             | suppl.material        |
| Risk of bias within studies   | 19 | Present data on risk of bias of each study and, if available, any outcome level assessment (see item 12).                                                                                                | 8 and suppl. material |
| Results of individual studies | 20 | For all outcomes considered (benefits or harms), present, for each study: (a) simple summary data for each intervention group (b) effect estimates and confidence intervals, ideally with a forest plot. | suppl.material        |
| Synthesis of results          | 21 | Present results of each meta-analysis done, including confidence intervals and measures of consistency.                                                                                                  | 6-8                   |
| Risk of bias across studies   | 22 | Present results of any assessment of risk of bias across studies (see Item 15).                                                                                                                          | 8 and suppl. material |
| Additional analysis           | 23 | Give results of additional analyses, if done (e.g., sensitivity or subgroup analyses, meta-regression [see Item 16]).                                                                                    | 7,8                   |
| <b>DISCUSSION</b>             |    |                                                                                                                                                                                                          |                       |
| Summary of evidence           | 24 | Summarize the main findings including the strength of evidence for each main outcome; consider their relevance to key groups (e.g., healthcare providers, users, and policy makers).                     | 8                     |
| Limitations                   | 25 | Discuss limitations at study and outcome level (e.g., risk of bias), and at review-level (e.g., incomplete retrieval of identified research, reporting bias).                                            | 9-10                  |
| Conclusions                   | 26 | Provide a general interpretation of the results in the context of other evidence, and implications for future research.                                                                                  | 9-10                  |
| <b>FUNDING</b>                |    |                                                                                                                                                                                                          |                       |
| Funding                       | 27 | Describe sources of funding for the systematic review and other support (e.g., supply of data); role of funders for the systematic review.                                                               | 11                    |

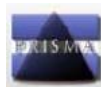

# PRISMA 2009 Checklist

For more information, visit: [www.prisma-statement.org](http://www.prisma-statement.org).

Page 2 of 2

For peer review only

1  
2  
3  
4  
5  
6  
7  
8  
9  
10  
11  
12  
13  
14  
15  
16  
17  
18  
19  
20  
21  
22  
23  
24  
25  
26  
27  
28  
29  
30  
31  
32  
33  
34  
35  
36  
37  
38  
39  
40  
41  
42  
43  
44  
45  
46  
47

# BMJ Open

## Variation of effect estimates in the analysis of mortality and length of hospital stay in patients with infections caused by bacteria producing extended-spectrum beta-lactamases: a systematic review and meta-analysis

|                                 |                                                                                                                                                                                                                                                                                                                                                                                                                                                                                                                                                                                                                                                                                                                                                                                                                                                                                                                                                                                                                                                                                                                                            |
|---------------------------------|--------------------------------------------------------------------------------------------------------------------------------------------------------------------------------------------------------------------------------------------------------------------------------------------------------------------------------------------------------------------------------------------------------------------------------------------------------------------------------------------------------------------------------------------------------------------------------------------------------------------------------------------------------------------------------------------------------------------------------------------------------------------------------------------------------------------------------------------------------------------------------------------------------------------------------------------------------------------------------------------------------------------------------------------------------------------------------------------------------------------------------------------|
| Journal:                        | <i>BMJ Open</i>                                                                                                                                                                                                                                                                                                                                                                                                                                                                                                                                                                                                                                                                                                                                                                                                                                                                                                                                                                                                                                                                                                                            |
| Manuscript ID                   | bmjopen-2019-030266.R2                                                                                                                                                                                                                                                                                                                                                                                                                                                                                                                                                                                                                                                                                                                                                                                                                                                                                                                                                                                                                                                                                                                     |
| Article Type:                   | Original research                                                                                                                                                                                                                                                                                                                                                                                                                                                                                                                                                                                                                                                                                                                                                                                                                                                                                                                                                                                                                                                                                                                          |
| Date Submitted by the Author:   | 13-Nov-2019                                                                                                                                                                                                                                                                                                                                                                                                                                                                                                                                                                                                                                                                                                                                                                                                                                                                                                                                                                                                                                                                                                                                |
| Complete List of Authors:       | Shamsrizi, Parichehr; University Hospital Tubingen Department of Internal Medicine I Gastroenterology Hepatology and Infectious Diseases, Division of Infectious Disease<br>Gladstone, Beryl Primrose ; University Hospital Tubingen Department of Internal Medicine I Gastroenterology Hepatology and Infectious Diseases, Division of Infectious Disease<br>Carrara, Elena; Integrated University Hospital of Verona, Division of Infectious Disease, Department of Diagnostic and Public Health<br>Luise, Dora; Integrated University Hospital of Verona, Division of Infectious Disease, Department of Diagnostic and Public Health<br>Cona, Andrea; ASST Santi Paolo e Carlo, Clinic of Infectious and Tropical Diseases, Department of Health Sciences<br>Bovo, Chiara; Integrated University Hospital of Verona, Medical Direction<br>Tacconelli, Evelina; University Hospital Tubingen Department of Internal Medicine I Gastroenterology Hepatology and Infectious Diseases, Division of Infectious Disease; Integrated University Hospital of Verona, Division of Infectious Disease, Department of Diagnostic and Public Health |
| <b>Primary Subject Heading</b>: | Infectious diseases                                                                                                                                                                                                                                                                                                                                                                                                                                                                                                                                                                                                                                                                                                                                                                                                                                                                                                                                                                                                                                                                                                                        |
| Secondary Subject Heading:      | Infectious diseases, Epidemiology                                                                                                                                                                                                                                                                                                                                                                                                                                                                                                                                                                                                                                                                                                                                                                                                                                                                                                                                                                                                                                                                                                          |
| Keywords:                       | Extended-spectrum beta-lactamase, mortality, bloodstream infection, length of stay, meta-analysis, systematic review                                                                                                                                                                                                                                                                                                                                                                                                                                                                                                                                                                                                                                                                                                                                                                                                                                                                                                                                                                                                                       |
|                                 |                                                                                                                                                                                                                                                                                                                                                                                                                                                                                                                                                                                                                                                                                                                                                                                                                                                                                                                                                                                                                                                                                                                                            |

SCHOLARONE™  
Manuscripts

1  
2  
3 1 **Variation of effect estimates in the analysis of mortality and length of hospital stay in**  
4 **patients with infections caused by bacteria producing extended-spectrum beta-**  
5 **lactamases: a systematic review and meta-analysis**  
6  
7  
8  
9

10 5 **AUTHORS:**

11 6 Parichehr Shamsrizi<sup>1</sup>, Beryl Primrose Gladstone<sup>1</sup>, Elena Carrara<sup>2</sup>, Dora Luise<sup>2</sup>, Andrea Cona<sup>3</sup>,  
12 7 Chiara Bovo<sup>4</sup>, Evelina Tacconelli<sup>1,2</sup>  
13  
14  
15  
16

17 9 **AFFILIATIONS:**

- 18  
19 10 1) Division of Infectious Disease, Department of Internal Medicine I, DZIF Partner site,  
20 11 Tübingen University Hospital, Tübingen, Germany  
21  
22 12 2) Division of Infectious Disease, Department of Diagnostic and Public Health, University  
23 13 Hospital of Verona, Verona, Italy  
24  
25 14 3) Clinic of Infectious and Tropical Diseases, Department of Health Sciences, ASST Santi  
26 15 Paolo e Carlo, University of Milan, Milan, Italy.  
27  
28 16 4) Medical Direction, University Hospital of Verona, Verona, Italy  
29  
30  
31  
32

33 18 **CORRESPONDING AUTHOR:** Elena Carrara, MD

34 19 **Address:** Division of Infectious Disease, Department of Diagnostic and Public Health,  
35 20 University Hospital of Verona, Verona, Italy  
36  
37 21 Piazzale L.A. Scuro 10, Dipartimento di Malattie Infettive, Policlinico Borgo Roma, 37100  
38 22 Verona, Italy.  
39

40 23 **Phone number:** +39 3339566252

41 24 **Email:** elena.carrara@univr.it  
42  
43  
44  
45

46 26 **WORD COUNT:** 2827  
47  
48  
49  
50  
51  
52  
53  
54  
55  
56  
57  
58  
59  
60



## 1 **ABSTRACT**

2 **Objective** To assess the variation of effect estimates in the analysis of mortality and length of  
3 stay (LOS) in patients with infections caused by extended-spectrum beta-lactamase (ESBL)-  
4 producing *Enterobacteriaceae*.

5 **Design** Systematic review and meta-analysis

6 **Methods** Literature search for clinical studies from 1 January 1960 to 1 October 2018 was  
7 conducted in PubMed. Primary outcomes were risk ratios (RRs) of all-cause and attributable  
8 mortality and weighted mean differences (WMDs) in LOS in patients with bloodstream  
9 infections (BSIs) and non-invasive infections. Any change in the effect estimates was  
10 assessed by grouping studies according to design, setting, economy-based country  
11 classification, reporting period, microbiological aetiology, infection type, and adjustment for  
12 appropriateness of empirical treatment. The impact of ESBL production was calculated using  
13 random effect meta-analysis and heterogeneity was evaluated by  $I^2$  statistics and  
14 metaregression.

15 **Results** Eighty-four studies including 22,030 patients and 149 outcome measures were  
16 included in the meta-analysis. Most studies were retrospective cohorts from high-income  
17 countries, providing unadjusted estimates. ESBL production in patients with BSIs (56 studies)  
18 increased the RR for all-cause mortality by a factor of 1.70 (95% CI: 1.52-1.90;  $p < 0.001$ ),  
19 attributable mortality (16 studies) by 1.75 (95% CI: 1.448-2.108;  $p < 0.001$ ), and WMD in the  
20 intensive care unit by 3.07 days (95% CI: 1.61-4.54;  $p < 0.001$ ). WMD in hospital LOS was  
21 significantly higher in BSIs (4.41 days; 95% CI: 3.37-5.46;  $p < 0.001$ ) and non-invasive (2.19  
22 days; 95% CI: 1.56-2.81;  $p < 0.001$ ). Subgroup analyses showed variation of estimates by  
23 study design, population, strain, and assessment of appropriateness of empiric treatment. High  
24 heterogeneity was observed in all analyses.

25 **Conclusions** Current evidence of the clinical burden of infections caused by ESBL-producing  
26 bacteria is highly heterogeneous and based mainly on unadjusted estimates derived from  
27 retrospective studies. Despite these limitations, ESBL production in strains causing BSIs  
28 seems associated with higher all-cause and attributable mortality and longer hospitalisation.

## 29 **KEYWORDS**

30 Extended-spectrum beta-lactamase, mortality, bloodstream infection, length of stay, meta-  
31 analysis, systematic review  
32

## 1 **STRENGTHS AND LIMITATIONS OF THIS STUDY**

- 2 ▶ Evidence of the impact of ESBL production on mortality and length of stay in strains
- 3 causing bacteremic and non-bacteremic infections was collected systematically.
- 4 ▶ Effect of multiple epidemiological and clinical variables was assessed in the calculation of
- 5 estimates.
- 6 ▶ Heterogeneity among studies was assessed.
- 7 ▶ Only few studies had been performed in high-risk populations or low-income countries.

For peer review only

## 1 INTRODUCTION

2 Infections caused by extended-spectrum beta-lactamase (ESBL)-producing  
3 *Enterobacteriaceae* are responsible for high morbidity and mortality worldwide.<sup>1,2,3</sup> The 2018  
4 World Health Organization list of antibiotic-resistant pathogens identified mortality as the  
5 most important criteria to prioritise bacteria for research and development of new, effective  
6 antibiotics.<sup>1</sup> In this prioritisation exercise, ESBL-producing *Enterobacteriaceae* were  
7 designated a critical priority because of their high all-cause mortality and high prevalence  
8 globally in healthcare-associated and community-acquired infections. The incidence and  
9 attributable mortality of multidrug-resistant bacterial infections, including ESBL-producing  
10 *Enterobacteriaceae*, in European countries has been recently estimated using a modelling  
11 analysis.<sup>4</sup> In 2015 ESBL-producing *Escherichia coli* was responsible for almost 300,000  
12 infections in Europe and 9,000 attributable deaths, and ESBL-producing *Klebsiella*  
13 *pneumoniae* caused around 70,000 infections and more than 3,500 deaths. The major  
14 limitation of this analysis is the sparseness of evidence on mortality due to ESBL-producing  
15 bacteria, which was limited largely to studies conducted in high-income countries.

16 Two systematic reviews have been performed to define the impact of ESBL production on  
17 mortality due to *Enterobacteriaceae*.<sup>2,3</sup> Both meta-analyses included studies targeting  
18 bloodstream infections (BSIs) and showed doubling all-cause mortality for ESBL-associated  
19 bacteraemia compared to non-ESBL *Enterobacteriaceae* bacteraemia. A major drawback of  
20 the analyses, highlighted by the authors, was the lack of control for confounding and limited  
21 adjustment for empiric therapy. No systematic review has been performed to assess  
22 attributable mortality and other indicators of clinical impact such as length of stay (LOS).

23 Because estimates of clinical burden drive policy design for antibiotic stewardship and  
24 infection control interventions, precise and current estimates are essential. The objective of  
25 this systematic review and meta-analysis was to assess the variation of effect estimates in the  
26 analysis of mortality and LOS in patients with infections due to ESBL-producing  
27 *Enterobacteriaceae*.

## 28 METHODS

### 29 Literature search strategy

30 The search was performed by 2 researchers (BPG and PS) in PubMed on 05 October 2018  
31 using search terms (supplementary table S1) relevant to the following combinations: (ESBL  
32 AND *Escherichia coli* AND mortality) OR (ESBL AND *Klebsiella pneumoniae* AND  
33

1 mortality) OR (ESBL AND Escherichia coli AND length of stay OR length of hospitalisation)  
2 OR (ESBL AND Klebsiella pneumoniae AND length of stay OR length of hospitalisation).  
3 Reference lists of retrieved articles were also searched.

#### 4 **Eligibility criteria**

5 We included all clinical studies with a comparison group assessing all-cause mortality,  
6 attributable mortality, and overall LOS and intensive care unit stay (ICU) LOS in hospitalised  
7 patients with ESBL infections. Studies published from 1 January 1960 to 1 October 2018  
8 irrespective of the clinical setting and study design were included. No language restriction has  
9 been applied. Diagnostic studies, reviews, case reports, non-clinical studies, and abstracts of  
10 conference presentations were not included.

#### 11 **Data extraction**

12 Two reviewers (PS and BPG) independently assessed the eligibility of trials and extracted  
13 data. In case of disagreement, a third reviewer (DL) was consulted. Extracted data were  
14 collected in an electronic worksheet, using EpiInfo 7.1: authors, journal, country, year of  
15 publication, year of study, time of data collection, study design, comparison group, study  
16 setting, population, aetiology, type and site of infection, and raw data related to mortality and  
17 LOS/ICU-LOS. Countries were classified as high-, middle-, or low-income using the World  
18 Bank Atlas method.<sup>5</sup> Adjusted effect estimates such as odds ratios (ORs) or hazard ratios and  
19 quality indicators such as reporting of antibiotic therapy, appropriateness of empirical  
20 treatment, resistance mechanisms, and minimum inhibitory concentrations (MICs) were also  
21 extracted.

22 Mortality data were extracted as all-cause mortality or attributable mortality as defined in the  
23 studies. Where available, prespecified time periods for mortality assessment (i.e., 14 days, 28  
24 days, in-hospital) were also extracted. LOS and ICU-LOS were extracted as days with mean  
25 and standard deviation or median and interquartile range.

#### 26 **Data analysis**

27 The primary outcomes for the clinical impact of ESBL infections were RRs of all-cause and  
28 attributable mortality and the weighted mean difference (WMD) in LOS and ICU-LOS in  
29 patients with ESBL infections compared with those in patients with non-ESBL infections and,  
30 where available, with uninfected patients. The impact of ESBL production on attributable and  
31 all-cause mortality was calculated with random effect meta-analysis and expressed as RR with

1  
2  
3 1 95% confidence interval (CI). WMD in days with 95% CI was calculated to express the  
4 2 excess in LOS and ICU-LOS.

5  
6  
7 3 Variation of the effect estimate was assessed by grouping the studies according to the  
8 4 following study/outcome characteristics: mortality time assessment (7 vs 14 days), aetiology  
9 5 (*E. coli* vs *K. pneumoniae*), infection localisation, clinical setting (paediatric, oncology, ICU),  
10 6 economic country areas (high-income countries [HICs] vs low- and medium-income countries  
11 7 [LMICs]), study design, assessment of empiric therapy, and year. Studies were classified  
12 8 according to the type of infections evaluated. Studies on BSIs were defined as those in which  
13 9 patients had positive blood cultures and were admitted to the hospitals with signs and  
14 10 symptoms of systemic inflammatory response and requiring therapy, similarly to the  
15 11 definition adopted by the most recent cohort studies on ESBL infections.<sup>6</sup> Non-invasive  
16 12 infections included non-bacteremic patients with only localised signs and symptoms of  
17 13 infection (such as urinary tract infections or superficial surgical site infections).

18  
19 14 Subgroup analysis was computed only if more than 2 studies were available for each group.  
20 15 Heterogeneity was evaluated by using  $I^2$  statistics and metaregression. Overall significance  
21 16 testing was carried out using Wald tests adjusted using the Bonferroni correction. The  
22 17 unadjusted ORs were compared with the adjusted ORs to estimate the effect of adjustment.  
23 18 Reporting and publication bias was presented in funnel plots (supplementary figure 1 and 2)  
24 19 and tested by Egger's test. Statistical analyses were performed using Stata version 15. Risk of  
25 20 bias was assessed independently by two authors (PS, DL) using the Newcastle - Ottawa  
26 21 quality assessment scale for cohort studies.<sup>7</sup> Studies were classified as low, moderate, or  
27 22 high quality according to AHRQ standards (supplementary table S2). All meta-analyses  
28 23 were performed in accordance with the Cochrane Collaboration recommendations<sup>8</sup> and  
29 24 reported according to the PRISMA statement.<sup>9</sup>

30 25 The protocol is available online.  
31 26 ([https://im1-tuebingen.de/wp-](https://im1-tuebingen.de/wp-content/uploads/2019/03/ClinicalImpactAMR_SR_studyprotocol_2018.pdf)  
32 27 [content/uploads/2019/03/ClinicalImpactAMR\\_SR\\_studyprotocol\\_2018.pdf](https://im1-tuebingen.de/wp-content/uploads/2019/03/ClinicalImpactAMR_SR_studyprotocol_2018.pdf))

## 33 28 **Patient and Public Involvement**

34 29 There was no patient or public involvement in this systematic review of published literature.

## 35 30 **RESULTS**

36 31 Our literature search identified 1006 studies, and 92 (9.2%) met the eligibility criteria on the  
37 32 basis of abstract screening. Full-text screening excluded an additional 5 articles, providing an

1  
2  
3 1 evidence base of 87 studies (Figure 1).<sup>10-96</sup> The 87 studies included in the qualitative analysis  
4 were conducted between 1991 and 2017 in 25 countries, mainly in South Korea (14 studies),  
5 2 Thailand (7), USA (7), Taiwan (7), and Spain (7). Sixty (68.9%) studies were performed in  
6 3 HICs, 26 (29.9%) in LMICs, and 1 included both HICs and LMICs.<sup>56</sup> About half (44, 50.6%)  
7 4 were retrospective cohort studies, 24 (27.6%) case cohort studies, and 18 (20.7%) prospective  
8 5 cohort studies; 1 study had an interventional design.<sup>57</sup> The comparison group was patients  
9 6 with infections caused by gram-negative non-ESBL producers in 82 (94.3%) studies, non-  
10 7 infected patients in 2 (2.3%), and both control groups in 3 (3.5%). Most (57, 65.5%) studies  
11 8 included data from the entire hospital, while a few focused on specific settings, mainly ICUs  
12 9 (9, 10.3%) and paediatric wards (8, 9.2%). The most common ESBL-producing bacteria were  
13 10 *E. coli* (23, 26.4%) and *K. pneumoniae* (17, 19.5%). An overview of study characteristics is  
14 11 provided in online supplementary table S3.  
15 12

16 13 Because data in 3 studies<sup>22,61,87</sup> were insufficient for quantitative analysis, 84 (96.6%) studies  
17 14 were included in the meta-analysis analysing data from 22,030 patients and 149 outcome  
18 15 measures. Fifty-seven studies analysed BSIs and 10 non-invasive infections. Study  
19 16 characteristics for all studies are provided in online supplementary table S4. 49 (58.3%)  
20 17 studies were of high quality, 23 (27.3%) were of moderate quality, and 12 (14.3%) were of  
21 18 low quality (supplementary table S5).  
22 19

### 20 19 **All-cause mortality**

21 20 All-cause mortality was reported in 81 studies including 21,942 patients (56 on BSIs and 7 on  
22 21 non-invasive infections). ESBL production in patients with BSIs increased all-cause mortality  
23 22 by a factor of 1.70 (95% CI: 1.52-1.90;  $p<0.001$ ;  $I^2=45.3%$ ;  $p<0.001$ ) while studies including  
24 23 non-invasive reported a RR of 1.58 (95% CI: 1.23-2.02;  $p<0.001$ ) (supplementary figure 3).  
25 24 Among the BSI patients, the RR increased over time from 1.56 (95% CI: 1.15-2.11;  $p=0.004$ )  
26 25 in 1991-1999 to 1.74 (95% CI: 1.50-2.01;  $p<0.001$ ) in 2000-2009, and it was stable in 2010-  
27 26 2018 (1.72, 95% CI: 1.39-2.13;  $p<0.001$ ). The RR was higher in studies assessing  
28 27 appropriateness of empiric therapy (RR=1.75; 95% CI 1.54-1.99;  $p<0.001$ ) than in those that  
29 28 did not (RR=1.55; 95% CI 1.26-1.90;  $p<0.001$ ). The subgroup analysis by pathogen showed  
30 29 that ESBL production increased the RR in BSIs due to *E. coli* (RR=1.82; 95% CI: 1.50-2.21;  
31 30  $p<0.001$ ) compared to those due to *K. pneumoniae* (RR=1.48; 95% CI: 1.17-1.87;  $p=0.001$ ).  
32 31 Stratification by population age showed a higher RR in paediatric population (RR=2.09; 95%  
33 32 CI: 1.62-2.71;  $p<0.001$ ). Effect estimates did not vary significantly by study country,  
34 33 mortality time assessment (14 vs 28 days), ESBL molecular resistance mechanisms, or study

1 design (Figure 2 and online supplementary figure 4). Adjusted estimates for inappropriate  
2 empirical antibiotic therapy were provided for 14 studies. The pooled unadjusted OR for all-  
3 cause mortality was 2.91 (95% CI: 2.23-3.81;  $p < 0.001$ ,  $I^2 = 27.1\%$ ;  $p = 0.164$ ) and the pooled  
4 OR after adjusting for receipt of appropriate empirical treatment was 3.22 (95% CI: 1.53-  
5 6.76;  $p = 0.002$ ;  $I^2 = 87.5\%$ ;  $p < 0.001$ ). The impact of ESBL production on LOS and mortality  
6 varied according to the infection type, with higher effect in intra-abdominal, respiratory and  
7 BSIs (supplemental figure 5 and 6).

### 8 **Attributable mortality**

9 Attributable mortality was analysed in 16 studies including 2,885 patients. All studies were  
10 performed in HICs. ESBL production in patients with BSIs increased the risk of attributable  
11 mortality by a factor of 1.75 (95% CI: 1.45-2.11;  $p < 0.001$ ;  $I^2 = 0\%$ ;  $p < 0.001$ ). The RR  
12 increased over time from 1.53 (95% CI: 1.10-2.12;  $p = 0.011$ ) in 1991-1999 to 1.91 (95% CI:  
13 1.43-2.54;  $p < 0.001$ ) in 2000-2009 (Figure 3). Pathogen-specific RR for attributable mortality  
14 was 1.60 (95% CI: 1.18-2.15;  $p = 0.002$ ) for *K. pneumoniae* and 1.76 (95% CI: 1.33-2.34;  
15  $p < 0.001$ ) when the gram-negative organisms were analysed all together without species  
16 differentiation. The subgroup analysis showed the RR was lower in case cohort studies (1.56;  
17 95% CI: 1.09-2.25;  $p = 0.016$ ) than in cohort studies (1.80; 95% CI: 1.37-2.37;  $p < 0.001$ ).

### 18 **Length of stay**

19 LOS data were provided in 37 studies (17 on BSIs and 8 on non-invasive) analysing 38  
20 outcome measures. The WMD of LOS in patients with BSIs was 4.41 days (95% CI: 3.37-  
21 5.46;  $p < 0.001$ ) and decreased from 5.72 days (95% CI: 2.69-8.75;  $p < 0.001$ ) in 1991-1999 to  
22 4.22 days (95% CI: 3.02-5.43;  $p < 0.001$ ) in 2000-2009 and was stable up to 2018 (4.30 days;  
23 95% CI: 1.38-7.22;  $p = 0.004$ ). Higher WMD ( $p < 0.001$ ) was observed for BSIs due to *K.*  
24 *pneumoniae* (7.67 days; 4.63-10.71) than for those due to *E. coli* (6.07 days; 95% CI 3.71-  
25 8.43). Retrospective cohort studies reported higher ( $p < 0.001$ ) WMD (6.43 days; 95% CI:  
26 4.66-8.21;  $p < 0.001$ ) than case cohort studies (3.32 days; 95% CI: 2.03-4.61). Studies in HICs  
27 showed higher WMD (4.56 days; 95% CI 3.43-5.70;  $p < 0.001$ ) than studies in LMICs (3.55  
28 days; 95% CI 0.84-6.26;  $p = 0.01$ ) (Figure 4).

29 Studies with non-invasive infections reported a WMD of 2.19 days (95% CI: 1.56-2.81;  
30  $p < 0.001$ ), which decreased from 7.66 (95% CI: 5.83-9.46;  $p < 0.001$ ) in 2000-2009 to 1.44  
31 (95% CI: 0.77-2.10;  $p < 0.001$ ) in 2010-2018 (online supplementary figure 7).

1  
2  
3 1 The data on ICU-LOS were provided in 7 studies and showed that BSIs caused by ESBL  
4 2 producers had a WMD of LOS of 3.07 days (95% CI: 1.61-4.54;  $p < 0.001$ ).

6  
7 3 Heterogeneity of the studied effect-modifiers did not reach statistical significance when  
8 4 assessed by metaregression (supplementary table S6). Sensitivity analysis based on the quality  
9 5 of studies revealed no notable difference in the effect estimates after exclusion of low-quality  
10 6 studies (data not shown). Egger's test and the funnel plots (online supplementary figure 1 and  
11 7 2) showed evidence for small study effects ( $p < 0.001$ ) and publication bias.

## 16 8 **DISCUSSION**

18 9 This systematic review shows that ESBL production has a significant impact on the most  
19 10 relevant patient-related clinical outcomes. In the subgroup analyses, all-cause mortality,  
20 11 attributable mortality, and LOS both in hospital and in ICU were higher for patients with BSIs  
21 12 due to ESBL-producing *Enterobacteriaceae* than for patients with BSIs due to non-ESBL-  
22 13 producing strains. Non-invasive infections caused by ESBL-producing strains were associated  
23 14 with higher all-cause mortality and prolonged LOS. Within the limitation of the low number  
24 15 of studies evaluating specific patient populations, paediatric and cancer patients seemed to  
25 16 suffer a higher impact of ESBL invasive infections than the overall population. Stratifying by  
26 17 pathogen type, the impact of ESBL production was higher for *E. coli* BSIs than for *K.*  
27 18 *pneumoniae* BSIs. No relevant differences in mortality analysis emerged with stratification by  
28 19 study design or country income level. Impact of ESBL infections on mortality became more  
29 20 evident in more recent studies. Studies reporting on appropriateness of empirical therapy,  
30 21 ESBL resistance mechanisms, and MICs showed a higher clinical impact of ESBL infections  
31 22 than studies not assessing these variables. In particular, pooled ORs adjusted for inappropriate  
32 23 empirical treatment, showed a remarkably higher OR for mortality in patients with ESBL  
33 24 infections.

34 25 Our findings confirm the results of previous systematic reviews. Schwaber et al. performed a  
35 26 systematic review comparing mortality in ESBL BSIs and non-ESBL BSIs in studies  
36 27 published through 2003.<sup>2</sup> The authors show a pooled RR for all-cause mortality of 1.85 but, in  
37 28 contrast to our study, they combined *E. coli*, *Klebsiella* spp., and *Proteus* spp. in the analysis  
38 29 because of sample size limitations. Rottier et al. analysed studies published through 2010 and  
39 30 adjusting results for inappropriate empirical treatment found an adjusted OR of 1.37.<sup>3</sup> Our  
40 31 study, adding more than 50 studies in 17 years to the Rottier systematic review, confirmed the  
41 32 clinical importance of ESBL production to all-cause mortality and for the first time assessed  
42 33 the role of ESBL production on attributable mortality. We addressed relevant effect-modifiers



1 through subgroup analyses and found that population, pathogen, and assessment of empiric  
2 therapy all had an impact on estimates. Because we believe that appropriate empirical  
3 treatment plays a relevant role in invasive infections, we performed a secondary analysis by  
4 pooling only adjusted ORs and confirming the significant impact of antibiotic resistance as  
5 already shown in a previously published systematic review.<sup>97</sup> The lack of consideration of  
6 appropriateness of therapy in the studies evaluating mortality seems to underestimate the  
7 impact of ESBL production on mortality. However, studies assessing the impact of  
8 appropriate therapy did not provide homogeneous definition and could refer either to  
9 empirical or definite therapy or a single component irrespective of the dosage, making results  
10 difficult to interpret. Especially in infections with different sources and different clinical  
11 severity, the sole contribution of empirical therapy remains challenging to measure. For  
12 example, patients with UTI receiving inappropriate empirical antibiotic therapy can  
13 potentially show a favourable outcome, most probably due to the high concentration of  
14 antibiotic reached in the urinary tract.<sup>98</sup>

15 Community acquired ESBL infections emerged in the late 1990s and show an increasing  
16 trend.<sup>99,100</sup> Recent study shows that community onset ESBL infections are associated with  
17 lower mortality compared with healthcare associated and hospital acquired infections.<sup>101</sup> The  
18 place of acquisition could not be appropriately addressed in our meta-analysis due to the lack  
19 of data in included studies.

20 Our systematic review contributes to the discussion on the limitation of current evidence for  
21 the estimation of mortality due to antibiotic-resistant infections. The impact of ESBL  
22 production on LOS in our study has shown that both BSIs and non-invasive infections lead to  
23 prolongation of hospitalisation.

24  
25 Our study has some limitations. Although results of the meta-analyses were significant in all  
26 the subgroups, we could analyse only a limited number of studies providing information for  
27 subgroups such as haematological patients and low-income countries, making generalizability  
28 of results less certain for these specific patient populations. Only a few studies reported MIC  
29 data or specific ESBL molecular resistant phenotype (i.e., AmpC). Moreover, publication bias  
30 was detected in both the main analyses (all-cause mortality and LOS), thus implying the  
31 possibility that results from small studies with non-significant results might have been  
32 conducted and not published, resulting in a possible overestimation of our results. The non-  
33 homogeneous reporting of some relevant data in published literature (e.g., disease severity,

1  
2  
3 1 underlying comorbidities and resistance mechanism) may also have affected the precision of  
4 2 the estimate. Patients with ESBL are intrinsically at higher risk of mortality and complications  
5 3 because they are often older, have more comorbidities or higher antibiotic exposure, and are  
6 4 at higher risk of receiving inappropriate empirical treatment.<sup>102</sup> Finally, due to resource  
7 5 constraints, we had to limit our search to PubMed database with the chance of missing  
8 6 relevant studies.

9  
10 7 In summary, our systematic review emphasises the importance of suspicion and confirmation  
11 8 of ESBL production as soon as possible for invasive infections and demonstrates that ESBL  
12 9 production increases the risk of attributable mortality and LOS in both hospital and ICU for  
13 10 invasive and non-invasive infections. Patients with ESBL infections remain at higher risk of  
14 11 mortality and prolonged LOS even after adjustment for empiric inappropriate treatment.  
15 12 Control for other relevant effect-modifiers is hindered by the sparseness of published data.  
16 13 Individual patient data (IPD) network meta-analyses are needed to define differences in  
17 14 outcomes between severe intravascular infections and bacteremia. Future studies addressing  
18 15 the clinical burden of drug-resistant infections must include ESBL production and should  
19 16 assess both the impact of molecular mechanisms of resistance and effect on specific patient  
20 17 populations such as haematological patients and those in LMIC.

21 18 **Acknowledgements** We thank Anne McDonough, a professional medical writer who  
22 19 provided medical writing support funded by the authors.

23 20 **Author Contributions** ET contributed to the study concept. BPG and PS performed data  
24 21 analysis. PS and AC extracted data and wrote the first draft of the manuscript. DL contributed  
25 22 to the first draft of the manuscript. EC and ET wrote the final version of the manuscript. CB  
26 23 reviewed the paper. All authors read, edited, and approved the final manuscript. The  
27 24 corresponding author had full access to all the data in the study and had final responsibility  
28 25 for the decision to submit for publication.

29 26 **Funding** This work was supported by the German Center for Infection Research Clinical  
30 27 Research Unit for Health-Care Associated Infections grant number TTU 08.701 and DRIVE-  
31 28 AB (115618). The funder had no involvement in the study design; in the collection, analysis  
32 29 and interpretation of the data; in the writing of the report; or in the decision to submit the  
33 30 paper for publication.

34 31 **Competing interests** The authors report no competing interests.

35 32 **Patient consent** Not required

36 33 **Provenance and peer review** Not commissioned; externally peer reviewed.

1 **Data sharing statement** Requests for data should be addressed to the corresponding author.

2  
3 **Open access** This is an open access article distributed in accordance with the Creative  
4 Commons Attribution Non Commercial (CC BY-NC 4.0) license, which permits others to  
5 distribute, remix, adapt, build upon this work non-commercially, and license their derivative  
6 works on different terms, provided the original work is properly cited, appropriate credit is  
7 given, any changes made indicated, and the use is non-commercial. See: [http://](http://creativecommons.org/licenses/by-nc/4.0/)  
8 [creativecommons.org/licenses/by-nc/4.0/](http://creativecommons.org/licenses/by-nc/4.0/).

9  
10  
11  
12  
13  
14  
15  
16  
17  
18  
19  
20  
21  
22  
23  
24  
25  
26  
27  
28  
29  
30  
31  
32  
33  
34  
35  
36  
37  
38  
39  
40  
41  
42  
43  
44  
45  
46  
47  
48  
49  
50  
51  
52  
53  
54  
55  
56  
57  
58  
59  
60

For peer review only

## 1 REFERENCES

- 1 1. Tacconelli E, Carrara E, Savoldi A, et al. Discovery, research, and development of new  
2 antibiotics: the WHO priority list of antibiotic-resistant bacteria and tuberculosis. *Lancet*  
3 *Infect Dis* 2018;18:318–27.
- 4 2. Schwaber MJ, Carmeli Y. Mortality and delay in effective therapy associated with  
5 extended-spectrum beta-lactamase production in Enterobacteriaceae bacteraemia: a  
6 systematic review and meta-analysis. *J Antimicrob Chemother* 2007;60:913–20.
- 7 3. Rottier WC, Ammerlaan HS, Bonten MJ. Effects of confounders and intermediates on the  
8 association of bacteraemia caused by extended-spectrum beta-lactamase-producing  
9 Enterobacteriaceae and patient outcome: a meta-analysis. *J Antimicrob Chemother*  
10 2012;67:1311–20.
- 11 4. Cassini A, Högberg LD, Plachouras D, et al; Attributable deaths and disability-adjusted  
12 life-years caused by infections with antibiotic-resistant bacteria in the EU and the  
13 European Economic Area in 2015: a population-level modelling analysis. *Lancet Infect*  
14 *Dis* 2019;19:56–66.
- 15 5. The World Bank. What is the World Bank Atlas method?  
16 [https://datahelpdesk.worldbank.org/knowledgebase/articles/77933-what-is-the-world-](https://datahelpdesk.worldbank.org/knowledgebase/articles/77933-what-is-the-world-bank-atlas-method)  
17 [bank-atlas-method](https://datahelpdesk.worldbank.org/knowledgebase/articles/77933-what-is-the-world-bank-atlas-method). Accessed January 14, 2019.
- 18 6. Rodriguez-Bano J, Gutierrez-Gutierrez B, Machuca I et al. Treatment of Infections  
19 Caused by Extended-Spectrum-Beta-Lactamase-, AmpC-, and Carbapenemase-Producing  
20 Enterobacteriaceae. *Clin Microbiol Rev* 2018; 31. doi:10.1128/CMR.00079-17
- 21 7. Wells GA, Shea B, O'Connell D, Peterson J, Welch V, Losos M *et al*. The Newcastle–  
22 Ottawa Scale (NOS) for assessing the quality of nonrandomized studies in meta-analyses.  
23 The Ottawa Health Research Institute: Ottawa, Canada.  
24 [http://www.ohri.ca/programs/clinical\\_epidemiology/oxford.htm](http://www.ohri.ca/programs/clinical_epidemiology/oxford.htm). Accessed April 14 2015
- 25 8. Higgins JPT, Green S (editors). *Cochrane Handbook for Systematic Reviews of*  
26 *Interventions* Version 5.1.0 [updated March 2011]. The Cochrane Collaboration, 2011.  
27 Available from <http://handbook.cochrane.org>.
- 28 9. Moher D, Liberati A, Tetzlaff J, et al. Preferred reporting items for systematic reviews and  
29 meta-analyses: the PRISMA statement. *BMJ* 2009;339:b2535.
- 30 10. Lautenbach E, Patel JB, Bilker WB, et al. Extended-spectrum beta-lactamase-producing  
31 *Escherichia coli* and *Klebsiella pneumoniae*: risk factors for infection and impact of  
32 resistance on outcomes. *Clin Infect Dis* 2001;32:1162–71.

- 1 11. Leistner R, Sakellariou C, Gurntke S, et al. Mortality and molecular epidemiology  
2 associated with extended-spectrum beta-lactamase production in *Escherichia coli* from  
3 bloodstream infection. *Infect Drug Resist* 2014;7:57–62.
- 4 12. Lin JN, Chen YH, Chang LL, et al. Clinical characteristics and outcomes of patients with  
5 extended-spectrum beta-lactamase-producing bacteremias in the emergency department.  
6 *Intern Emerg Med* 2011;6:547–55.
- 7 13. Kim HJ, Park JH, Park DI, et al. Clinical impact of extended-spectrum beta-lactamase-  
8 producing Enterobacteriaceae in patients with biliary tract infection. *Dig Dis Sci*  
9 2013;58:841–9.
- 10 14. Kim SH, Kwon JC, Choi SM, et al. *Escherichia coli* and *Klebsiella pneumoniae*  
11 bacteremia in patients with neutropenic fever: factors associated with extended-spectrum  
12 beta-lactamase production and its impact on outcome. *Ann Hematol* 2013;92:533–41.
- 13 15. Pillay T, Pillay DG, Adhikari M, et al. Piperacillin/tazobactam in the treatment of  
14 *Klebsiella pneumoniae* infections in neonates. *Am J Perinatol* 1998;15:47–51.
- 15 16. Kim BN, Woo JH, Kim MN, et al. Clinical implications of extended-spectrum beta-  
16 lactamase-producing *Klebsiella pneumoniae* bacteraemia. *J Hosp Infect* 2002;52:99–106.
- 17 17. Kim YK, Pai H, Lee HJ, et al. Bloodstream infections by extended-spectrum beta-  
18 lactamase-producing *Escherichia coli* and *Klebsiella pneumoniae* in children:  
19 epidemiology and clinical outcome. *Antimicrob Agents Chemother* 2002;46:1481–91.
- 20 18. Bhavnani SM, Ambrose PG, Craig WA, et al. Outcomes evaluation of patients with  
21 ESBL- and non-ESBL-producing *Escherichia coli* and *Klebsiella* species as defined by  
22 CLSI reference methods: report from the SENTRY Antimicrobial Surveillance Program.  
23 *Diagn Microbiol Infect Dis* 2006;54:231–6.
- 24 19. Blomberg B, Jureen R, Manji KP, et al. High rate of fatal cases of pediatric septicemia  
25 caused by gram-negative bacteria with extended-spectrum beta-lactamases in Dar es  
26 Salaam, Tanzania. *J Clin Microbiol* 2005;43:745–9.
- 27 20. Panhotra BR, Saxena AK, Al-Ghamdi AM. Extended-spectrum beta-lactamase-producing  
28 *Klebsiella pneumoniae* hospital acquired bacteremia. Risk factors and clinical outcome.  
29 *Saudi Med J* 2004;25:1871–6.
- 30 21. Marra AR, Wey SB, Castelo A, et al. Nosocomial bloodstream infections caused by  
31 *Klebsiella pneumoniae*: impact of extended-spectrum beta-lactamase (ESBL) production  
32 on clinical outcome in a hospital with high ESBL prevalence. *BMC Infect Dis* 2006;6:24.

- 1 22. Skippen I, Shemko M, Turton J, et al. Epidemiology of infections caused by extended-  
2 spectrum beta-lactamase-producing *Escherichia coli* and *Klebsiella* spp.: a nested case-  
3 control study from a tertiary hospital in London. *J Hosp Infect* 2006;64:115–23.
- 4 23. Schwaber MJ, Navon-Venezia S, Kaye KS, et al. Clinical and economic impact of  
5 bacteremia with extended-spectrum-beta-lactamase-producing *Enterobacteriaceae*.  
6 *Antimicrob Agents Chemother* 2006;50:1257–62.
- 7 24. Apisarnthanarak A, Kiratisin P, Saifon P, et al. Clinical and molecular epidemiology of  
8 community-onset, extended-spectrum beta-lactamase-producing *Escherichia coli*  
9 infections in Thailand: a case-case-control study. *Am J Infect Control* 2007;35:606–12.
- 10 25. Tumbarello M, Spanu T, Sanguinetti M, et al. Bloodstream infections caused by extended-  
11 spectrum-beta-lactamase-producing *Klebsiella pneumoniae*: risk factors, molecular  
12 epidemiology, and clinical outcome. *Antimicrob Agents Chemother* 2006;50:498–504.
- 13 26. Apisarnthanarak A, Kiratisin P, Saifon P, et al. Risk factors for and outcomes of  
14 healthcare-associated infection due to extended-spectrum beta-lactamase-producing  
15 *Escherichia coli* or *Klebsiella pneumoniae* in Thailand. *Infect Control Hosp Epidemiol*  
16 2007;28:873–6. doi: 10.1086/518725
- 17 27. Kanafani ZA, Mehio-Sibai A, Araj GF, et al. Epidemiology and risk factors for extended-  
18 spectrum beta-lactamase-producing organisms: a case control study at a tertiary care  
19 center in Lebanon. *Am J Infect Control* 2005;33:326–32.
- 20 28. Zaoutis TE, Goyal M, Chu JH, et al. Risk factors for and outcomes of bloodstream  
21 infection caused by extended-spectrum beta-lactamase-producing *Escherichia coli* and  
22 *Klebsiella* species in children. *Pediatrics* 2005;115:942–9.
- 23 29. Loh LC, Nor Izran Hanim Bt Abdul S, Rosdara Masayuni Bt Mohd S, et al. Hospital  
24 Outcomes of Adult Respiratory Tract Infections with Extended-Spectrum B-Lactamase  
25 (ESBL) Producing *Klebsiella pneumoniae*. *Malays J Med Sci* 2007;14:36–40.
- 26 30. Melzer M, Petersen I. Mortality following bacteraemic infection caused by extended  
27 spectrum beta-lactamase (ESBL) producing *E. coli* compared to non-ESBL producing *E.*  
28 *coli*. *J Infect* 2007;55:254–9. doi: 10.1016/j.jinf.2007.04.007
- 29 31. Song KH, Jeon JH, Park WB, et al. Clinical outcomes of spontaneous bacterial peritonitis  
30 due to extended-spectrum beta-lactamase-producing *Escherichia coli* and *Klebsiella*  
31 species: a retrospective matched case-control study. *BMC Infect Dis* 2009;9:41.
- 32 32. Bennett JW, Robertson JL, Hospenthal DR, et al. Impact of extended spectrum beta-  
33 lactamase producing *Klebsiella pneumoniae* infections in severely burned patients. *J Am*  
34 *Coll Surg* 2010;211:391–9.

- 1  
2  
3 1 33. Trecarichi EM, Tumbarello M, Spanu T, et al. Incidence and clinical impact of extended-  
4 2 spectrum-beta-lactamase (ESBL) production and fluoroquinolone resistance in  
5 3 bloodstream infections caused by *Escherichia coli* in patients with hematological  
6 4 malignancies. *J Infect* 2009;58:299–307.
- 7 5 34. Tuon FF, Kruger M, Terreri M, et al. *Klebsiella* ESBL bacteremia-mortality and risk  
8 6 factors. *Braz J Infect Dis* 2011;15:594–8.
- 9 7 35. Kang CI, Song JH, Chung DR, et al. Risk factors and treatment outcomes of community-  
10 8 onset bacteraemia caused by extended-spectrum beta-lactamase-producing *Escherichia*  
11 9 *coli*. *Int J Antimicrob Agents* 2010;36:284–7.
- 12 10 36. Pena C, Gudiol C, Calatayud L, et al. Infections due to *Escherichia coli* producing  
13 11 extended-spectrum beta-lactamase among hospitalised patients: factors influencing  
14 12 mortality. *J Hosp Infect* 2008;68:116–22.
- 15 13 37. Tumbarello M, Spanu T, Di Bidino R, et al. Costs of bloodstream infections caused by  
16 14 *Escherichia coli* and influence of extended-spectrum-beta-lactamase production and  
17 15 inadequate initial antibiotic therapy. *Antimicrob Agents Chemother* 2010;54:4085–91.
- 18 16 38. Kang CI, Chung DR, Ko KS, et al. Risk factors for infection and treatment outcome of  
19 17 extended-spectrum beta-lactamase-producing *Escherichia coli* and *Klebsiella pneumoniae*  
20 18 bacteremia in patients with hematologic malignancy. *Ann Hematol* 2012;91:115–21.
- 21 19 39. Wu YH, Chen PL, Hung YP, et al. Risk factors and clinical impact of levofloxacin or  
22 20 cefazolin nonsusceptibility or ESBL production among uropathogens in adults with  
23 21 community-onset urinary tract infections. *J Microbiol Immunol Infect* 2014;47:197–203.
- 24 22 40. Rodriguez-Bano J, Picon E, Gijon P, et al. Community-onset bacteremia due to extended-  
25 23 spectrum beta-lactamase-producing *Escherichia coli*: risk factors and prognosis. *Clin*  
26 24 *Infect Dis* 2010;50:40–8.
- 27 25 41. Gurntke S, Kohler C, Steinmetz I, et al. Molecular epidemiology of extended-spectrum  
28 26 beta-lactamase (ESBL)-positive *Klebsiella pneumoniae* from bloodstream infections and  
29 27 risk factors for mortality. *J Infect Chemother* 2014;20:817–9.
- 30 28 42. Oh MM, Chae JY, Kim JW, et al. Positive culture for extended-spectrum beta-lactamase  
31 29 during acute prostatitis after prostate biopsy is a risk factor for progression to chronic  
32 30 prostatitis. *Urology* 2013;81:1209–12.
- 33 31 43. Leistner R, Gurntke S, Sakellariou C, et al. Bloodstream infection due to extended-  
34 32 spectrum beta-lactamase (ESBL)-positive *K. pneumoniae* and *E. coli*: an analysis of the  
35 33 disease burden in a large cohort. *Infection* 2014;42:991–7.

- 1  
2  
3 1 44. Ku NS, Chung HS, Choi JY, et al. Clinical usefulness of the 2010 clinical and laboratory  
4 standards institute revised breakpoints for cephalosporin use in the treatment of  
5 2 bacteremia caused by *Escherichia coli* or *Klebsiella* spp. *Biomed Res Int*  
6 3 2015;2015:831074.  
7 4  
8 5  
9 5 45. Anunnatsiri S, Towiwat P, Chaimanee P. Risk factors and clinical outcomes of extended  
10 6 spectrum beta-lactamase (ESBL)-producing *Escherichia coli* septicemia at Srinagarind  
11 7 University Hospital, Thailand. *Southeast Asian J Trop Med Public Health* 2012;43:1169–  
12 8 77.  
13 9  
14 9 46. Kang CI, Kim SH, Kim DM, et al. Risk factors for and clinical outcomes of bloodstream  
15 10 infections caused by extended-spectrum beta-lactamase-producing *Klebsiella*  
16 11 *pneumoniae*. *Infect Control Hosp Epidemiol* 2004;25:860–7.  
17 12  
18 12 47. Raviv Y, Shitrit D, Amital A, et al. Multidrug-resistant *Klebsiella pneumoniae* acquisition  
19 13 in lung transplant recipients. *Clin Transplant* 2012;26:E388–94.  
20 14  
21 14 48. MacVane SH, Tuttle LO, Nicolau DP. Impact of extended-spectrum beta-lactamase-  
22 15 producing organisms on clinical and economic outcomes in patients with urinary tract  
23 16 infection. *J Hosp Med* 2014;9:232–8.  
24 17  
25 17 49. Abhilash KP, Veeraraghavan B, Abraham OC. Epidemiology and outcome of bacteremia  
26 18 caused by extended spectrum beta-lactamase (ESBL)-producing *Escherichia coli* and  
27 19 *Klebsiella* spp. in a tertiary care teaching hospital in south India. *J Assoc Physicians India*  
28 20 2010;58 Suppl:13-7.  
29 21  
30 21 50. Shanthi M, Sekar U. Extended spectrum beta lactamase producing *Escherichia coli* and  
31 22 *Klebsiella pneumoniae*: risk factors for infection and impact of resistance on outcomes. *J*  
32 23 *Assoc Physicians India* 2010;58 Suppl:41–4.  
33 24  
34 24 51. Han SB, Jung SW, Bae EY, et al. Extended-spectrum beta-lactamase-producing  
35 25 *Escherichia coli* and *Klebsiella pneumoniae* bacteremia in febrile neutropenic children.  
36 26 *Microb Drug Resist* 2015;21:244–51.  
37 27  
38 27 52. Lee S, Song DY, Cho SH, et al. Impact of extended-spectrum beta-lactamase on acute  
39 28 pyelonephritis treated with empirical ceftriaxone. *Microb Drug Resist* 2014;20:39–44.  
40 29  
41 29 53. Chayakulkeeree M, Junsriwong P, Keerasuntonpong A, et al. Epidemiology of extended-  
42 30 spectrum beta-lactamase producing gram-negative bacilli at Siriraj Hospital, Thailand,  
43 31 2003. *Southeast Asian J Trop Med Public Health* 2005;36:1503–9.  
44 32  
45 32 54. Apisarnthanarak A, Kiratisin P, Mundy LM. Predictors of mortality from community-  
46 33 onset bloodstream infections due to extended-spectrum beta-lactamase-producing  
47  
48  
49  
50  
51  
52  
53  
54  
55  
56  
57  
58  
59  
60



- 1  
2  
3 1 Escherichia coli and Klebsiella pneumoniae. *Infect Control Hosp Epidemiol* 2008;29:671–  
4 4.  
5 2  
6 3  
7 3 55. Apisarnthanarak A, Kiratisin P, Saifon P, et al. Predictors of mortality among patients  
8 4 with community-onset infection due to extended-spectrum beta-lactamase-producing  
9 5 Escherichia coli in Thailand. *Infect Control Hosp Epidemiol* 2008;29:80–2.  
10 6  
11 6 56. Jean SS, Ko WC, Xie Y, et al. Clinical characteristics of patients with community-  
12 7 acquired complicated intra-abdominal infections: a prospective, multicentre, observational  
13 8 study. *Int J Antimicrob Agents* 2014;44:222–8.  
14 9  
15 9 57. Lee J, Pai H, Kim YK, et al. Control of extended-spectrum beta-lactamase-producing  
16 10 Escherichia coli and Klebsiella pneumoniae in a children's hospital by changing  
17 11 antimicrobial agent usage policy. *J Antimicrob Chemother* 2007;60:629–37.  
18 12  
19 12 58. Briongos-Figuero LS, Gomez-Traveso T, Bachiller-Luque P, et al. Epidemiology, risk  
20 13 factors and comorbidity for urinary tract infections caused by extended-spectrum beta-  
21 14 lactamase (ESBL)-producing enterobacteria. *Int J Clin Pract* 2012;66:891–6.  
22 15  
23 15 59. Ha YE, Kang CI, Cha MK, et al. Epidemiology and clinical outcomes of bloodstream  
24 16 infections caused by extended-spectrum beta-lactamase-producing Escherichia coli in  
25 17 patients with cancer. *Int J Antimicrob Agents* 2013;42:403–9.  
26 18  
27 18 60. Du B, Long Y, Liu H, et al. Extended-spectrum beta-lactamase-producing Escherichia  
28 19 coli and Klebsiella pneumoniae bloodstream infection: risk factors and clinical outcome.  
29 20 *Intensive Care Med* 2002;28:1718–23.  
30 21  
31 21 61. Stone PW, Gupta A, Loughrey M, et al. Attributable costs and length of stay of an  
32 22 extended-spectrum beta-lactamase-producing Klebsiella pneumoniae outbreak in a  
33 23 neonatal intensive care unit. *Infect Control Hosp Epidemiol* 2003;24:601–6.  
34 24  
35 24 62. Pena C, Pujol M, Ardanuy C, et al. An outbreak of hospital-acquired Klebsiella  
36 25 pneumoniae bacteraemia, including strains producing extended-spectrum beta-lactamase.  
37 26 *J Hosp Infect* 2001;47:53–9.  
38 27  
39 27 63. Kola A, Maciejewski O, Sohr D, et al. Clinical impact of infections caused by ESBL-  
40 28 producing E. coli and K. pneumoniae. *Scand J Infect Dis* 2007;39:975–82.  
41 29  
42 29 64. Tsai MH, Lee IT, Chu SM, et al. Clinical and Molecular Characteristics of Neonatal  
43 30 Extended-Spectrum beta-Lactamase-Producing Gram-Negative Bacteremia: A 12-Year  
44 31 Case-Control-Control Study of a Referral Center in Taiwan. *PLoS One*  
45 32 2016;11(8):e0159744.  
46  
47  
48  
49  
50  
51  
52  
53  
54  
55  
56  
57  
58  
59  
60

- 1  
2  
3 1 65. Maslikowska JA, Walker SA, Elligsen M, et al. Impact of infection with extended-  
4 spectrum beta-lactamase-producing *Escherichia coli* or *Klebsiella* species on outcome and  
5 2 hospitalization costs. *J Hosp Infect* 2016;92:33–41.  
6 3  
7 8  
8 4 66. Onken A, Said AK, Jorstad M, et al. Prevalence and antimicrobial resistance of microbes  
9 5 causing bloodstream infections in Unguja, Zanzibar. *PLoS One* 2015;10:e0145632.  
10 6  
11 67. Nguyen ML, Toye B, Kanji S, et al. Risk factors for and outcomes of bacteremia caused  
12 7 by extended-spectrum  $\beta$ -lactamase-producing *Escherichia coli* and *Klebsiella* species at a  
13 8 Canadian tertiary care hospital. *Can J Hosp Pharm* 2015;68(2):136–43. [published Online  
14 9 First: 2015/05/13]  
15 10  
16 68. Denis B, Lafaurie M, Donay JL, et al. Prevalence, risk factors, and impact on clinical  
17 11 outcome of extended-spectrum beta-lactamase-producing *Escherichia coli* bacteraemia: a  
18 12 five-year study. *Int J Infect Dis* 2015;39:1–6.  
19 13  
20 69. Chopra T, Marchaim D, Johnson PC, et al. Risk factors for bloodstream infection caused  
21 14 by extended-spectrum beta-lactamase-producing *Escherichia coli* and *Klebsiella*  
22 15 pneumoniae: A focus on antimicrobials including cefepime. *Am J Infect Control*  
23 16 2015;43:719–23.  
24 17  
25 70. Artero A, Esparcia A, Alberola J, et al. Prospective cohort study of risk factors for  
26 18 extended-spectrum ss-lactamase-producing *Escherichia coli* urinary tract infections in  
27 19 elderly patients admitted to hospital. *Int J Clin Pract* 2017;71:doi:10.1111/ijcp.13001  
28 20  
29 71. Chen IL, Huang HC, Wu CT, et al. Analysis of early-onset bloodstream infection due to  
30 21 *Escherichia coli* infection in premature babies. *Medicine* 2017;96:e7748.  
31 22  
32 72. Islas-Munoz B, Volkow-Fernandez P, Ibanes-Gutierrez C, et al. Bloodstream infections in  
33 23 cancer patients. Risk factors associated with mortality. *Int J Infect Dis* 2018;71:59–64.  
34 24  
35 73. Ma J, Li N, Liu Y, et al. Antimicrobial resistance patterns, clinical features, and risk  
36 25 factors for septic shock and death of nosocomial *E coli* bacteremia in adult patients with  
37 26 hematological disease: A monocenter retrospective study in China. *Medicine*  
38 27 2017;96:e6959.  
39 28  
40 74. Man MY, Shum HP, Chan YH, et al. Clinical predictors and outcomes of *Klebsiella*  
41 29 pneumoniae bacteraemia in a regional hospital in Hong Kong. *J Hosp Infect* 2017;97:35–  
42 30 41.  
43 31  
44 75. Marando R, Seni J, Mirambo MM, et al. Predictors of the extended-spectrum-beta  
45 32 lactamases producing Enterobacteriaceae neonatal sepsis at a tertiary hospital, Tanzania.  
46 33 *Int J Med Microbiol* 2018;308:803–11.  
47  
48  
49  
50  
51  
52  
53  
54  
55  
56  
57  
58  
59  
60

- 1  
2  
3 1 76. Namikawa H, Yamada K, Fujimoto H, et al. Clinical characteristics of bacteremia caused  
4 by extended-spectrum beta-lactamase-producing *Escherichia coli* at a tertiary hospital.  
5 2  
6 *Intern Med* 2017;56:1807–15.  
7 3  
8 4 77. Shi SH, Feng XN, Lai MC, et al. Biliary diseases as main causes of pyogenic liver abscess  
9 caused by extended-spectrum beta-lactamase-producing Enterobacteriaceae. *Liver Int*  
10 5  
11 2017;37:727–34.  
12 6  
13 7 78. Tanir Basaranoglu S, Ozsurekci Y, Aykac K, et al. A comparison of blood stream  
14 infections with extended spectrum beta-lactamase-producing and non-producing  
15 8  
16 *Klebsiella pneumoniae* in pediatric patients. *Ital J Pediat* 2017;43:79.  
17 9  
18 10 79. Razazi K, Mekontso Dessap A, Carteaux G, et al. Frequency, associated factors and  
19 outcome of multi-drug-resistant intensive care unit-acquired pneumonia among patients  
20 11  
21 colonized with extended-spectrum beta-lactamase-producing Enterobacteriaceae. *Ann*  
22 12  
23 *Intensive Care* 2017;7:61.  
24 13  
25 14 80. Ray S, Anand D, Purwar S, et al. Association of high mortality with extended-spectrum  
26 beta-lactamase (ESBL) positive cultures in community acquired infections. *J Crit Care*  
27 15  
28 2018;44:255–60.  
29 16  
30 17 81. Haruki Y, Hagiya H, Haruki M, et al. Clinical characteristics and outcome of critically ill  
31 patients with bacteremia caused by extended-spectrum beta-lactamase-producing and non-  
32 18  
33 producing *Escherichia coli*. *J Infect Chemother* 2018;24:944–7.  
34 19  
35 20 82. Lin WT, Tang HJ, Lai CC, et al. Clinical manifestations and bacteriological features of  
36 culture-proven Gram-negative bacterial arthritis. *J Microbiol Immunol Infect*  
37 21  
38 2017;50:527–31.  
39 22  
40 23 83. Buys H, Muloiwa R, Bamford C, et al. *Klebsiella pneumoniae* bloodstream infections at a  
41 South African children's hospital 2006-2011, a cross-sectional study. *BMC Infect Dis*  
42 24  
43 2016;16:570.  
44 25  
45 26 84. Lee CC, Lee CH, Hong MY, et al. Propensity-matched analysis of the impact of extended-  
46 spectrum beta-lactamase production on adults with community-onset *Escherichia coli*,  
47 27  
48 *Klebsiella* species, and *Proteus mirabilis* bacteremia. *J Microbiol Immunol Infect*  
49 28  
50 2018;51:519–26.  
51 29  
52 30 85. Huang YY, Alleyne A, Leung V, et al. Urosepsis due to extended-spectrum beta-  
53 lactamase-producing *Escherichia coli*: a retrospective, single-centre review of risk factors  
54 31  
55 and clinical outcomes. *Can J Hosp Pharm* 2018;71:119-27.  
56 32  
57  
58  
59  
60

- 1  
2  
3 1 86. Komatsu Y, Kasahara K, Inoue T, et al. Molecular epidemiology and clinical features of  
4 2 extended-spectrum beta-lactamase- or carbapenemase-producing *Escherichia coli*  
5 3 bacteremia in Japan. *PLoS One* 2018;13:e0202276.  
6  
7  
8 4 87. Liu M, Li M, Wu L, et al. Extended-spectrum beta-lactamase-producing *E. coli*  
9 5 septicemia among rectal carriers in the ICU. *Medicine* 2018;97:e12445.  
10  
11 6 88. Nivesvivat T, Piyaraj P, Thunyaharn S, et al. Clinical epidemiology, risk factors and  
12 7 treatment outcomes of extended-spectrum beta-lactamase producing Enterobacteriaceae  
13 8 bacteremia among children in a tertiary care hospital, Bangkok, Thailand. *BMC Res Notes*  
14 9 2018;11:624.  
15  
16  
17 10 89. Cordery RJ, Roberts CH, Cooper SJ, et al. Evaluation of risk factors for the acquisition of  
18 11 bloodstream infections with extended-spectrum beta-lactamase-producing *Escherichia coli*  
19 12 and *Klebsiella* species in the intensive care unit; antibiotic management and clinical  
20 13 outcome. *J Hosp Infect* 2008;68:108–15.  
21  
22  
23 14 90. Daikos GL, Kosmidis C, Tassios PT, et al. Enterobacteriaceae bloodstream infections:  
24 15 presence of integrons, risk factors, and outcome. *Antimicrob Agents Chemother*  
25 16 2007;51:2366–72. doi: 10.1128/AAC.00044-07 [published Online First: 2007/04/25]  
26  
27  
28 17 91. Gudiol C, Calatayud L, Garcia-Vidal C, et al. Bacteraemia due to extended-spectrum beta-  
29 18 lactamase-producing *Escherichia coli* (ESBL-EC) in cancer patients: clinical features, risk  
30 19 factors, molecular epidemiology and outcome. *J Antimicrob Chemother* 2010;65(2):333–  
31 20 41.  
32  
33  
34 21 92. Marchaim D, Gottesman T, Schwartz O, et al. National multicenter study of predictors  
35 22 and outcomes of bacteremia upon hospital admission caused by Enterobacteriaceae  
36 23 producing extended-spectrum beta-lactamases. *Antimicrob Agents Chemother*  
37 24 2010;54:5099–104.  
38  
39  
40 25 93. Menashe G, Borer A, Yagupsky P, et al. Clinical significance and impact on mortality of  
41 26 extended-spectrum beta lactamase-producing Enterobacteriaceae isolates in nosocomial  
42 27 bacteremia. *Scand J Infect Dis* 2001;33:188–93.  
43  
44  
45 28 94. Ortega M, Marco F, Soriano A, et al. Analysis of 4758 *Escherichia coli* bacteraemia  
46 29 episodes: predictive factors for isolation of an antibiotic-resistant strain and their impact  
47 30 on the outcome. *J Antimicrob Chemother* 2009;63:568–74.  
48  
49  
50 31 95. Szilagyi E, Fuzi M, Borocz K, et al. Risk factors and outcomes for bloodstream infections  
51 32 with extended-spectrum beta-lactamase-producing *Klebsiella pneumoniae* ; Findings of  
52 33 the nosocomial surveillance system in Hungary. *Acta Microbiol Immunol Hung*  
53 34 2009;56:251–62. doi:

- 1  
2  
3 1 96. Tsai SS, Huang JC, Chen ST, et al. Characteristics of *Klebsiella pneumoniae* bacteremia  
4 in community-acquired and nosocomial infections in diabetic patients. *Chang Gung Med J*  
5 2010;33:532–9.  
6  
7  
8 4 97. Carrara E, Pfeffer I, Zusman O, et al. Determinants of inappropriate empirical antibiotic  
9 treatment: systematic review and meta-analysis. *Int J Antimicrob Agents* 2018;51:548–53,  
10  
11  
12 6 98. Horcajada JP, Shaw E, Padilla B, et al. Healthcare-associated, community-acquired and  
13 hospital-acquired bacteraemic urinary tract infections in hospitalized patients: a  
14 prospective multicentre cohort study in the era of antimicrobial resistance. *Clin Microbiol*  
15 *Infect.* 2013 Oct;19(10):96  
16  
17 9  
18 10 99. Pitout JD, Nordmann P, Laupland KB et al. Emergence of Enterobacteriaceae producing  
19 extended-spectrum beta-lactamases (ESBLs) in the community. *J Antimicrob Chemother*  
20 2005; 56: 52-59. doi:10.1093/jac/dki166  
21  
22 12  
23 13 100. Pitout JD, Laupland KB. Extended-spectrum beta-lactamase-producing  
24 Enterobacteriaceae: an emerging public-health concern. *Lancet Infect Dis* 2008; 8: 159-  
25 166. doi:10.1016/S1473-3099(08)70041-0  
26  
27 15  
28 16 101. Palacios-Baena ZR, Gutierrez-Gutierrez B, De Cueto M et al. Development and  
29 validation of the INCREMENT-ESBL predictive score for mortality in patients with  
30 bloodstream infections due to extended-spectrum-beta-lactamase-producing  
31 Enterobacteriaceae. *J Antimicrob Chemother* 2017; 72: 906-913. doi:10.1093/jac/dkw513  
32  
33 18  
34 19 102. Gandra S, Barter DM, Laxminarayan R. Economic burden of antibiotic resistance:  
35 how much do we really know? *Clin Microbiol Infect* 2014;20:973–80.  
36  
37 20  
38 21  
39  
40  
41  
42  
43  
44  
45  
46  
47  
48  
49  
50  
51  
52  
53  
54  
55  
56  
57  
58  
59  
60

1  
2  
3 **1 FIGURE LEGENDS**

4 2  
5 3 Figure 1: Literature search and study inclusion and exclusion  
6 4

7 4  
8 5 Figure 2: Pooled risk ratios for all-cause mortality in patients with ESBL bloodstream  
9 6 infections compared to patients with non-ESBL bloodstream infections— subgroups not  
10 7 included in attributable mortality  
11 8

12 9 Figure 3: Pooled risk ratios for attributable mortality in patients with ESBL bloodstream  
13 10 infections compared to patients with non-ESBL bloodstream infections  
14 10  
15 11

16 12 Figure 4: Weighted mean difference in the length of stay for patients with ESBL bloodstream  
17 13 infections compared to patients with non-ESBL bloodstream infections  
18 13  
19 14  
20  
21  
22  
23  
24  
25  
26  
27  
28  
29  
30  
31  
32  
33  
34  
35  
36  
37  
38  
39  
40  
41  
42  
43  
44  
45  
46  
47  
48  
49  
50  
51  
52  
53  
54  
55  
56  
57  
58  
59  
60

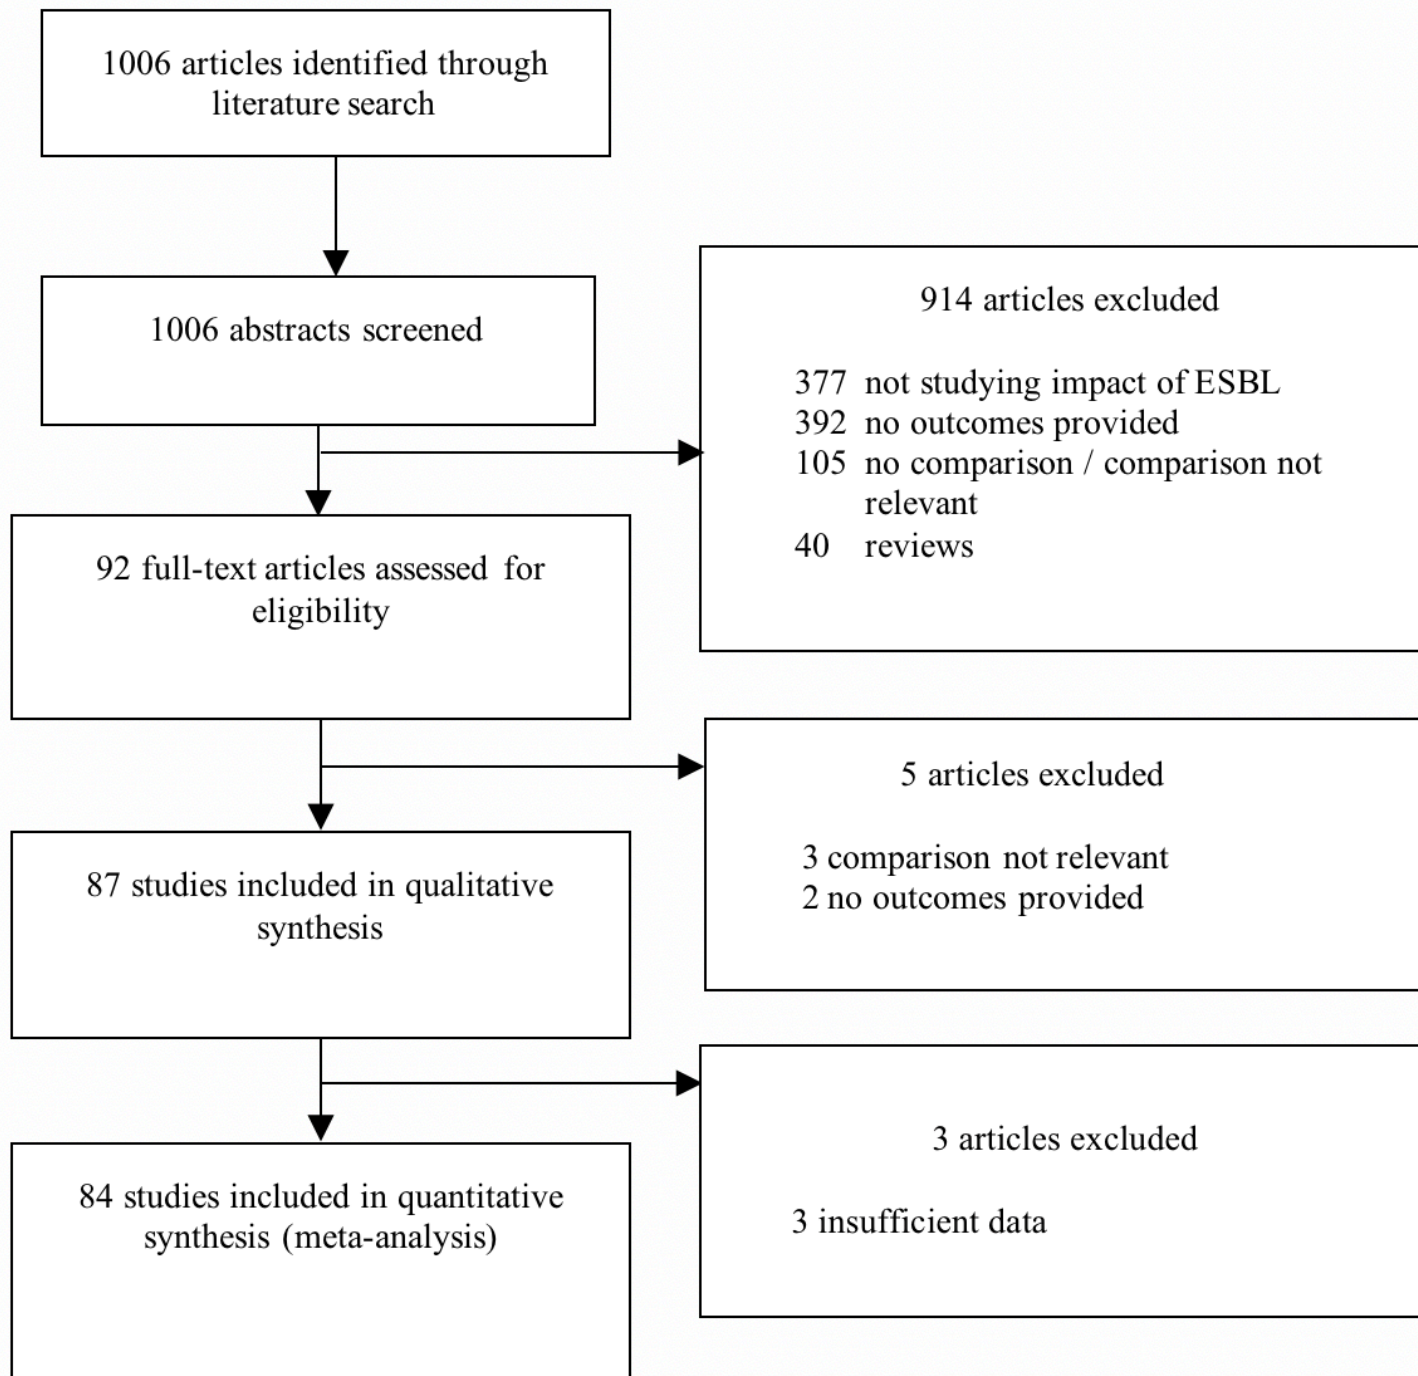

risk  
ratio (95% CI)

Category

N

**Overall**

Overall 56 1.70 (1.52, 1.90)

**Mortality time**

14 day mortality 5 1.77 (1.15, 2.72)

28 day mortality 22 1.63 (1.35, 1.97)

Time not defined 27 1.70 (1.47, 1.97)

**Income classification**

High income countries 41 1.76 (1.54, 2.00)

Low/middle income countries 15 1.56 (1.25, 1.96)

**Study population**

All kinds of patients 36 1.65 (1.43, 1.90)

Cancer patients 5 1.73 (1.16, 2.57)

Children 7 2.09 (1.62, 2.71)

Neonates 3 1.76 (1.27, 2.45)

**Appropriateness of therapy**

Reported 44 1.75 (1.54, 1.99)

Not reported 12 1.55 (1.26, 1.90)

0 .5 1 2 3 4







Supplementary figure 1: Funnel plot of risk ratios for all-cause mortality in patients with ESBL bloodstream infections compared to patients with non-ESBL bloodstream infections



The y axis  $se(\log RR)$  is the standard error of the log risk ratio. Pseudo 95% confidence limit refers to the 95% confidence limits around the summary treatment effect for each standard error on the vertical axis and to the expected distribution of studies in the absence of heterogeneity or of selection biases.

Supplementary figure 2: Funnel plot of weighted mean differences in the length of stay for patients with ESBL bloodstream infections compared to patients with non-ESBL bloodstream infections

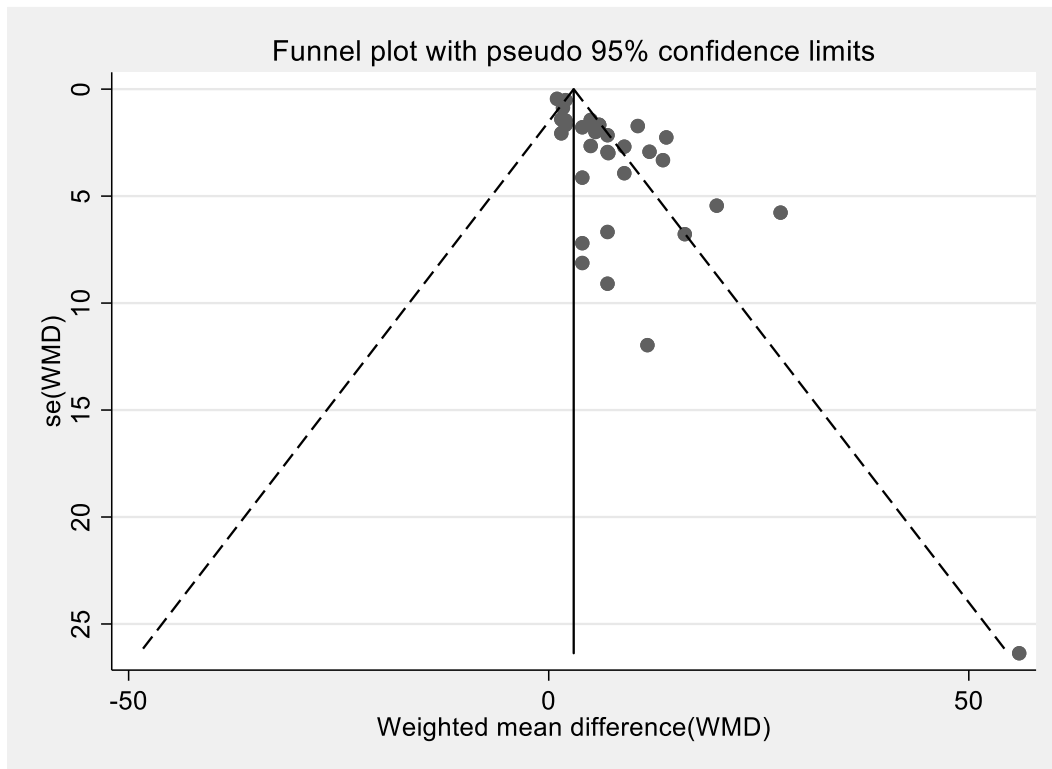

The y axis  $se(WMD)$  is the standard error of the weighted mean difference. Pseudo 95% confidence limit refers to the 95% confidence limits around the summary treatment effect for each standard error on the vertical axis and to the expected distribution of studies in the absence of heterogeneity or of selection biases.

**Supplementary figure 3: Pooled risk ratios for all-cause mortality in patients with noninvasive ESBL infections compared to patients with noninvasive non-ESBL infections**

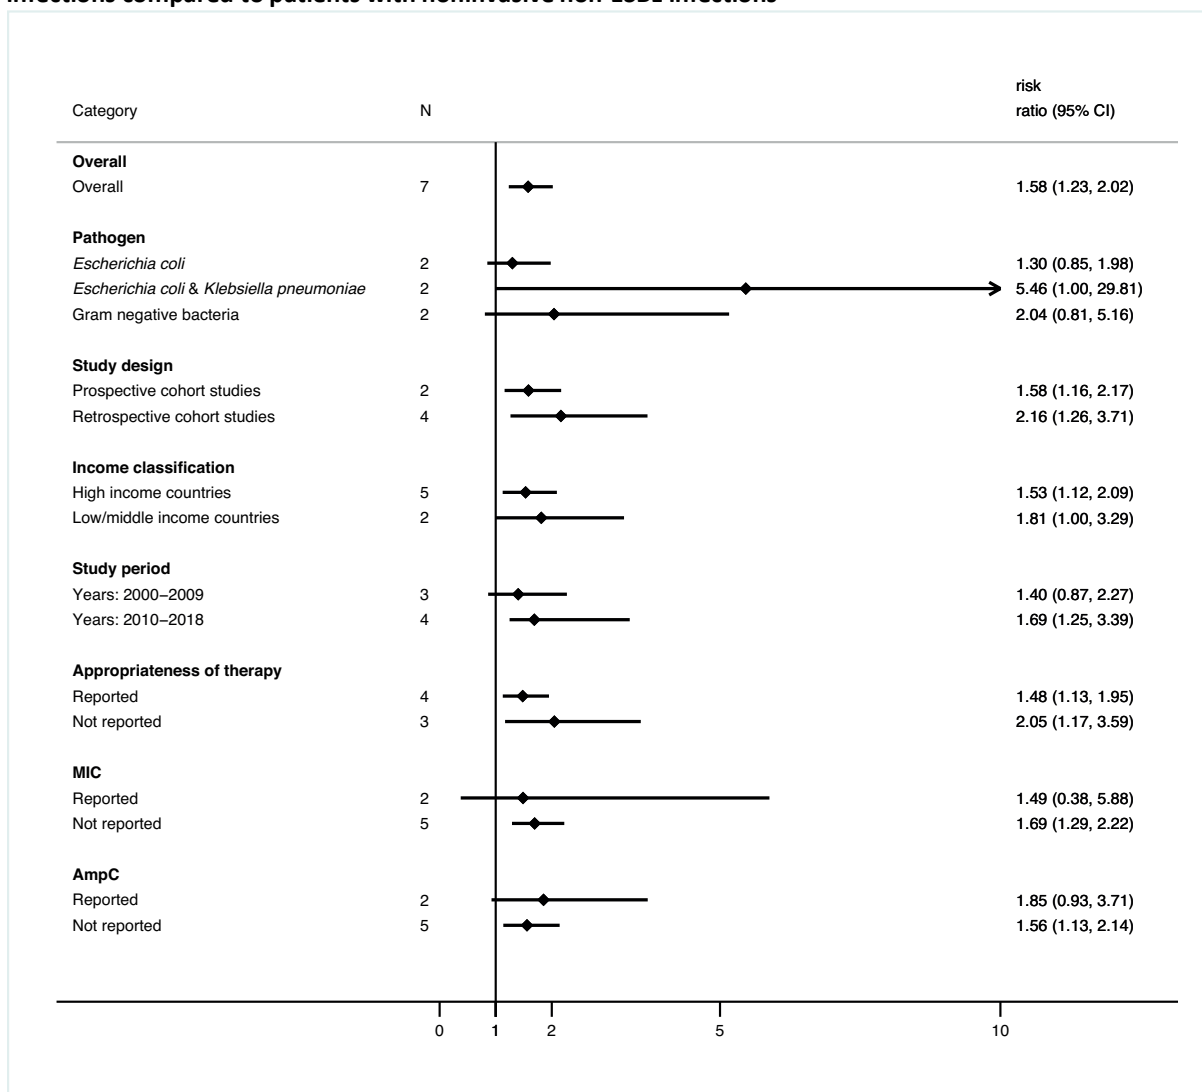

Only

**Supplementary figure 4: Pooled risk ratios for all-cause mortality in patients with ESBL bloodstream infections compared to patients with non-ESBL bloodstream infections—all subgroups**

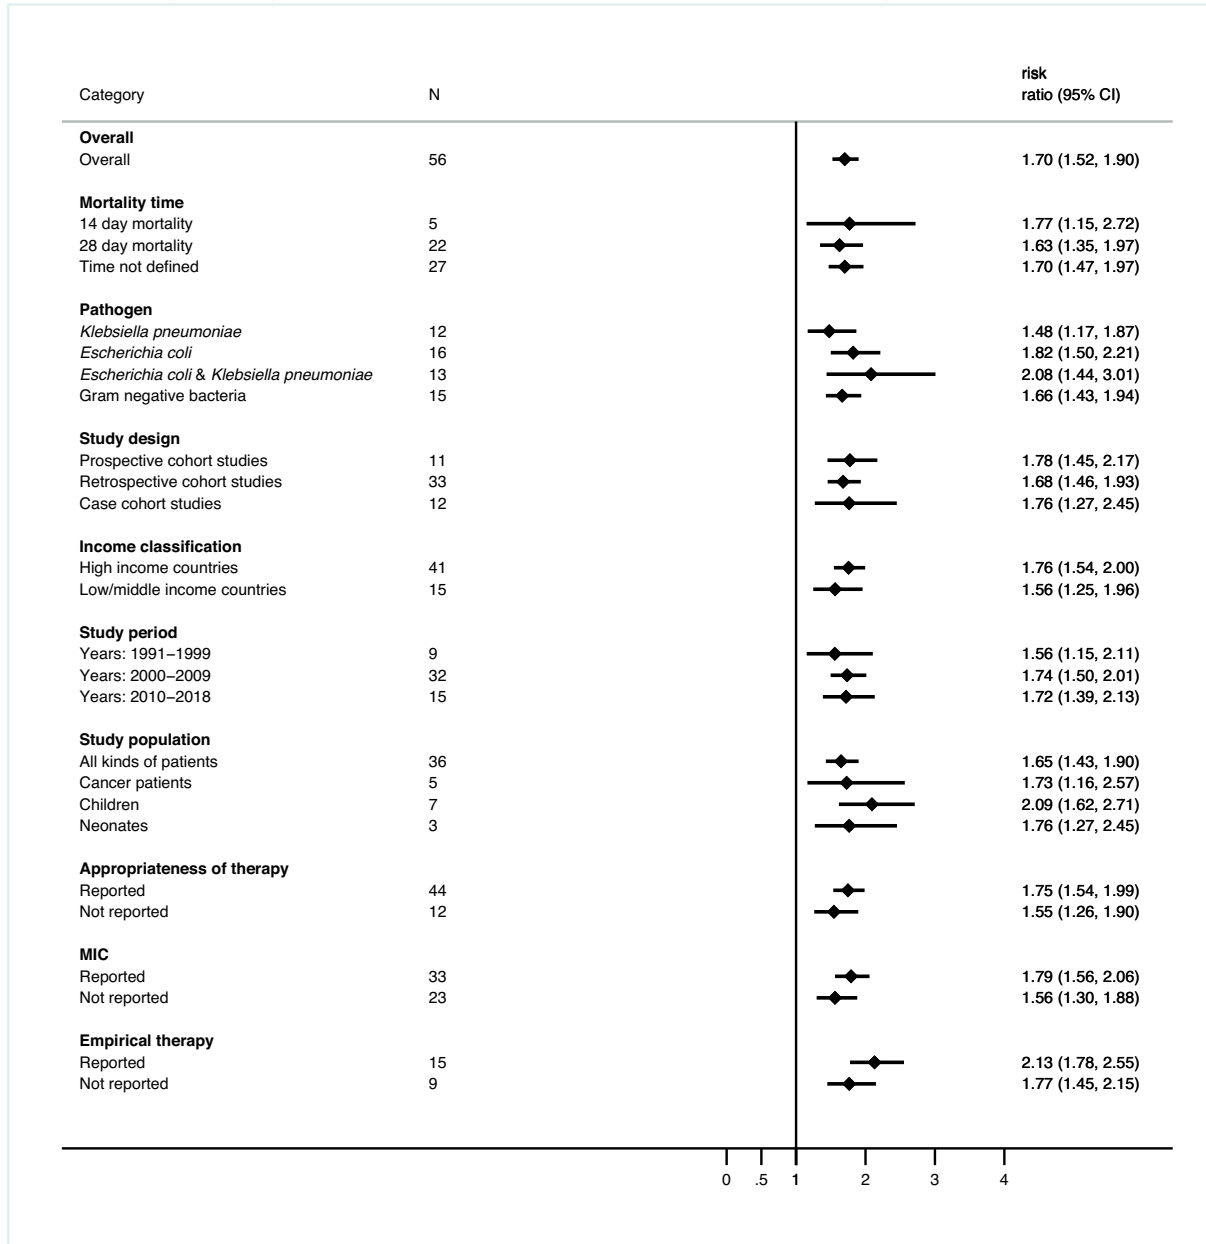

**Supplementary figure 5: Pooled risk ratios for all-cause mortality stratified by type of infection**

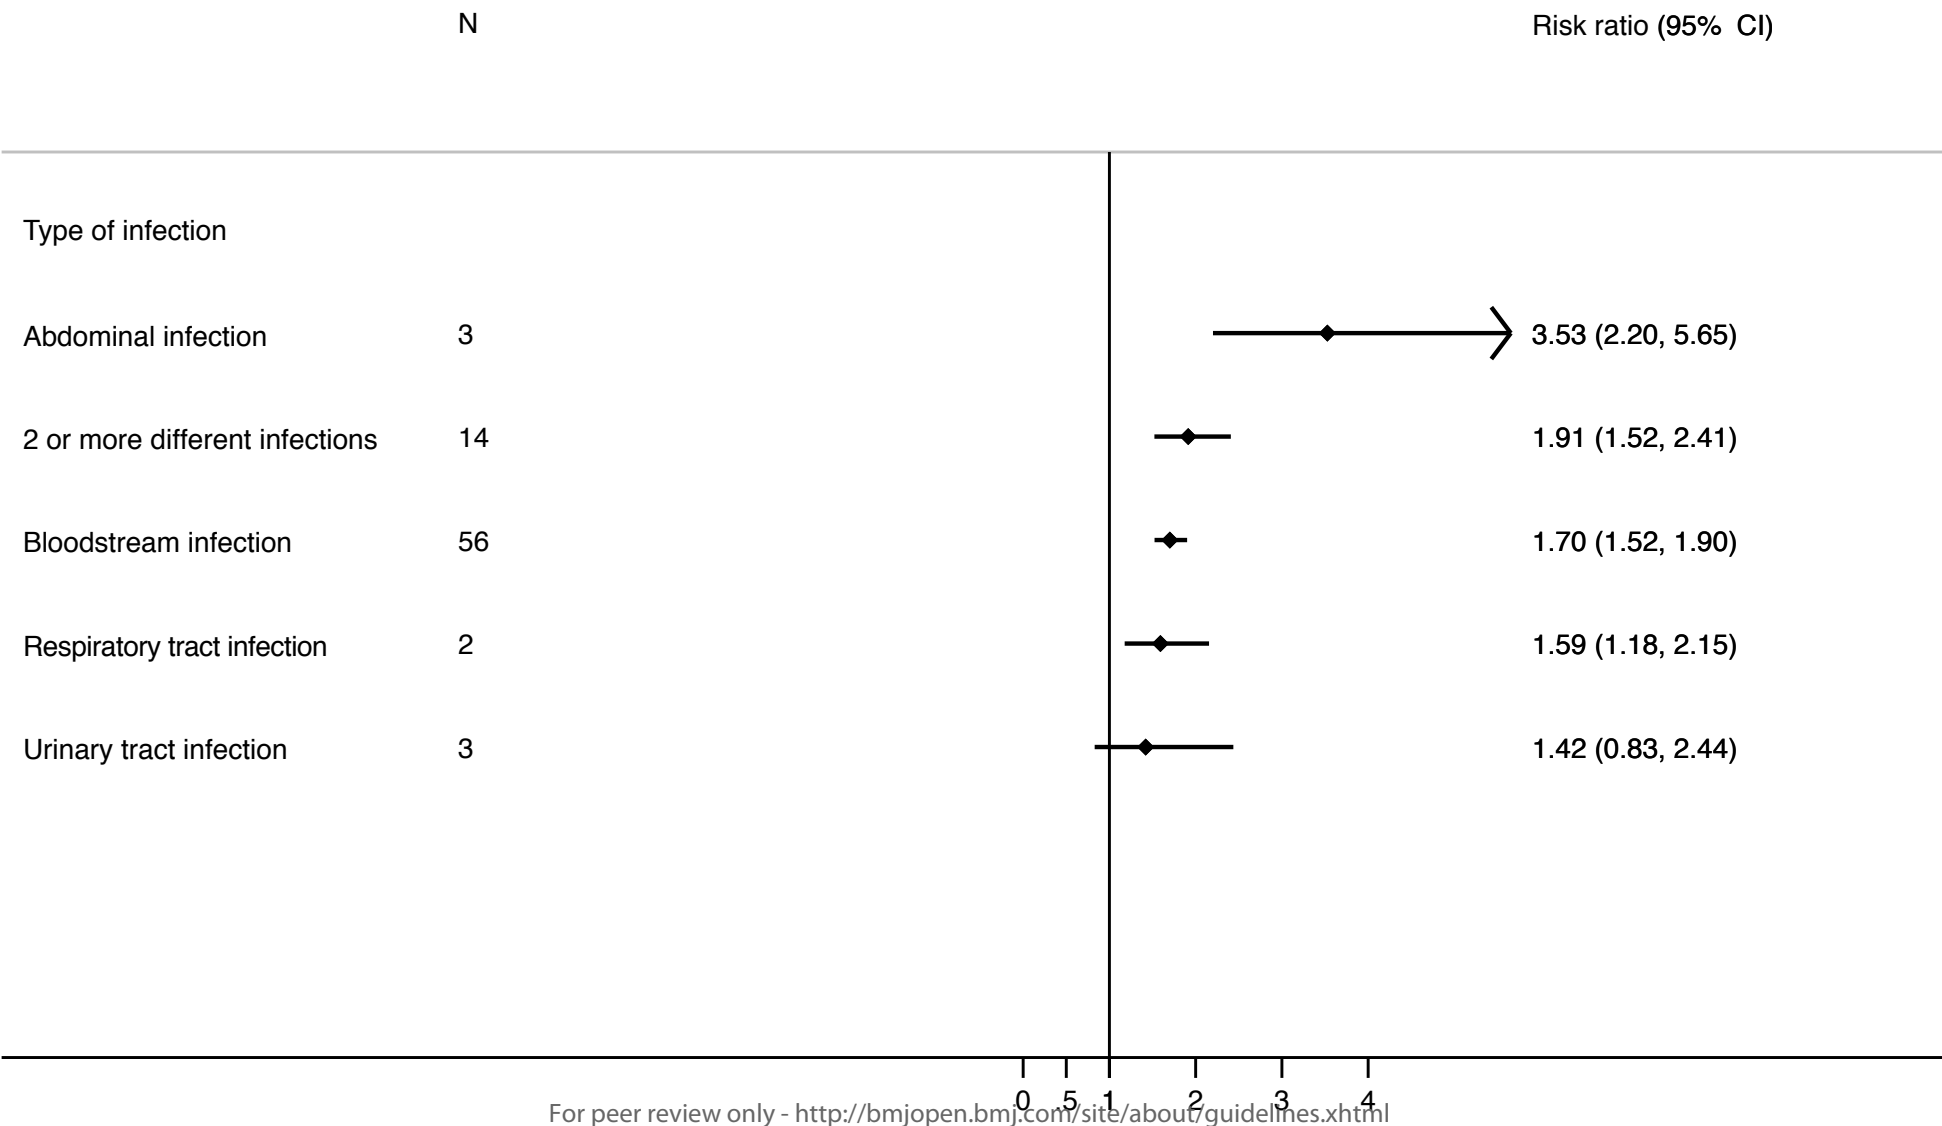

1  
2  
3  
4  
5  
6  
7  
8  
9  
10  
11  
12  
13  
14  
15  
16  
17  
18  
19  
20  
21  
22  
23  
24  
25  
26  
27  
28  
29  
30  
31  
32  
33  
34  
35  
36  
37  
38  
39  
40  
41  
42

1  
2  
3  
4  
5  
6  
7  
8  
9  
10  
11  
12  
13  
14  
15  
16  
17  
18  
19  
20  
21  
22  
23  
24  
25  
26  
27  
28  
29  
30  
31  
32  
33  
34  
35  
36  
37  
38  
39  
40  
41  
42

**Supplementary figure 6: Weighted mean differences in length of hospital stay stratified by type of infection**

N Weighted mean difference (95% CI)

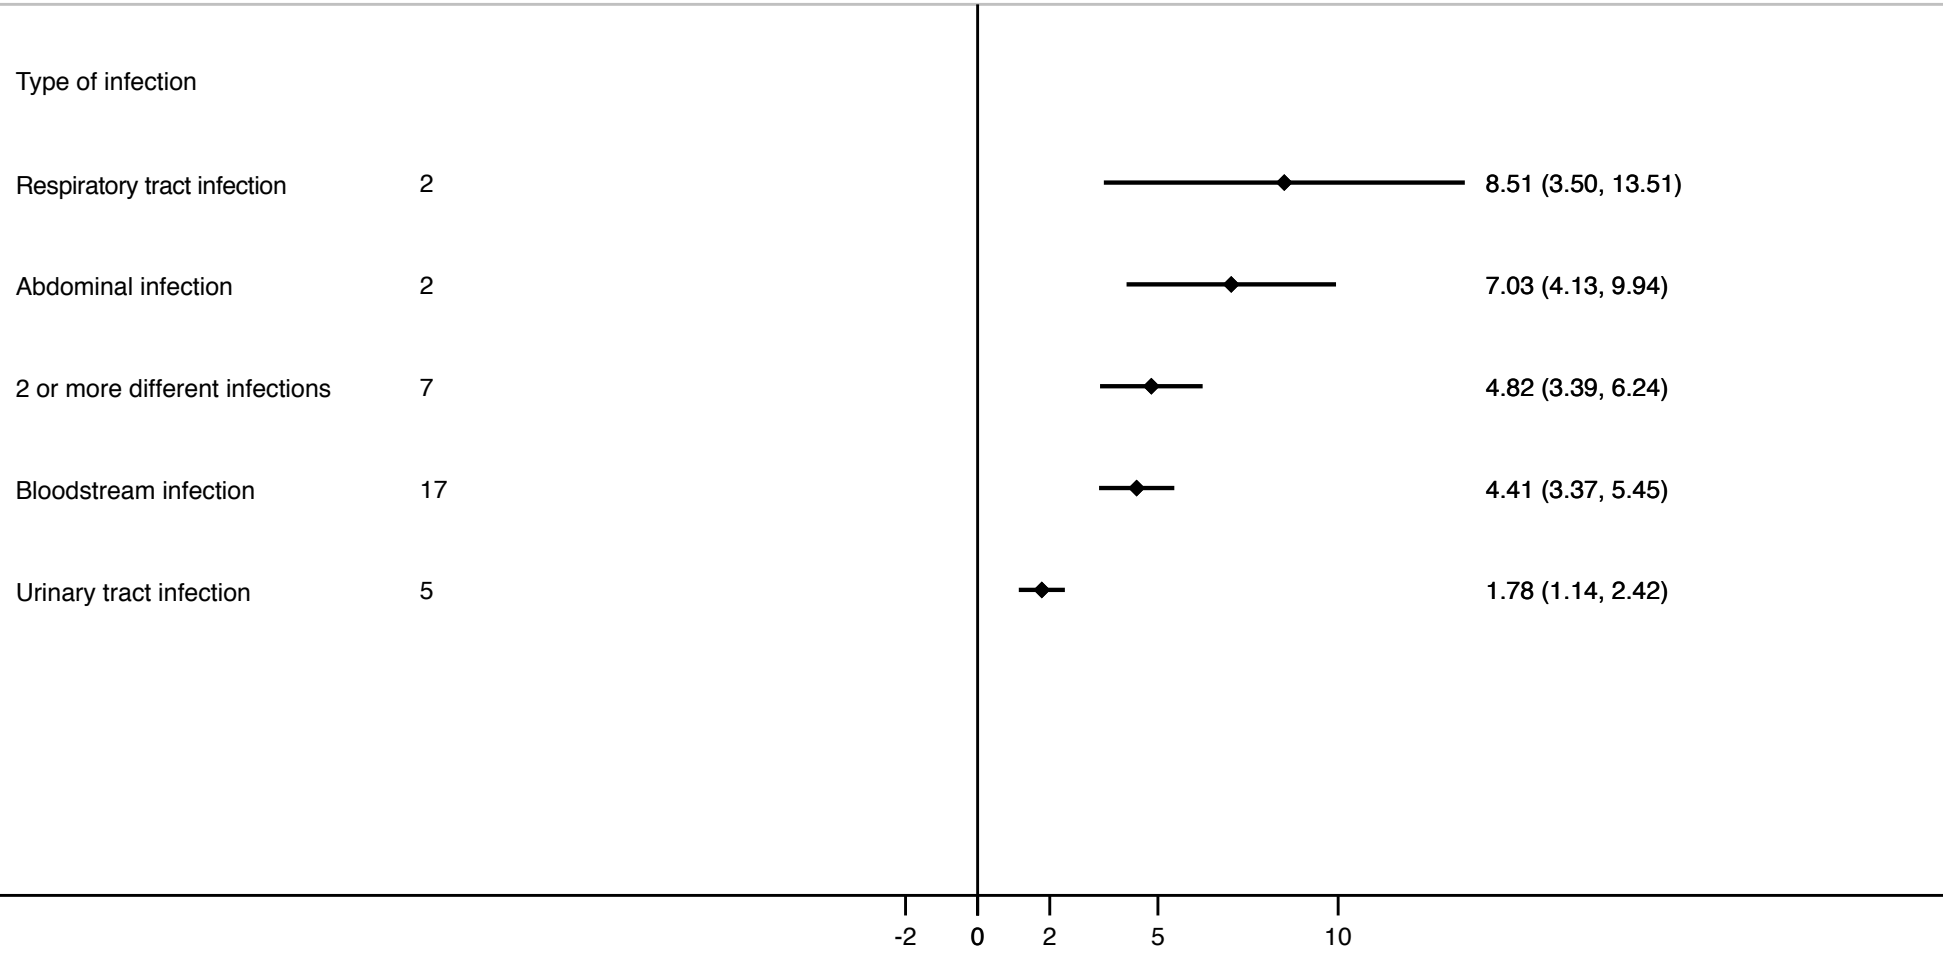



**Supplementary figure 7: Weighted mean differences in length of hospital stay in patients with noninvasive ESBL infections compared to patients with noninvasive non-ESBL infections**

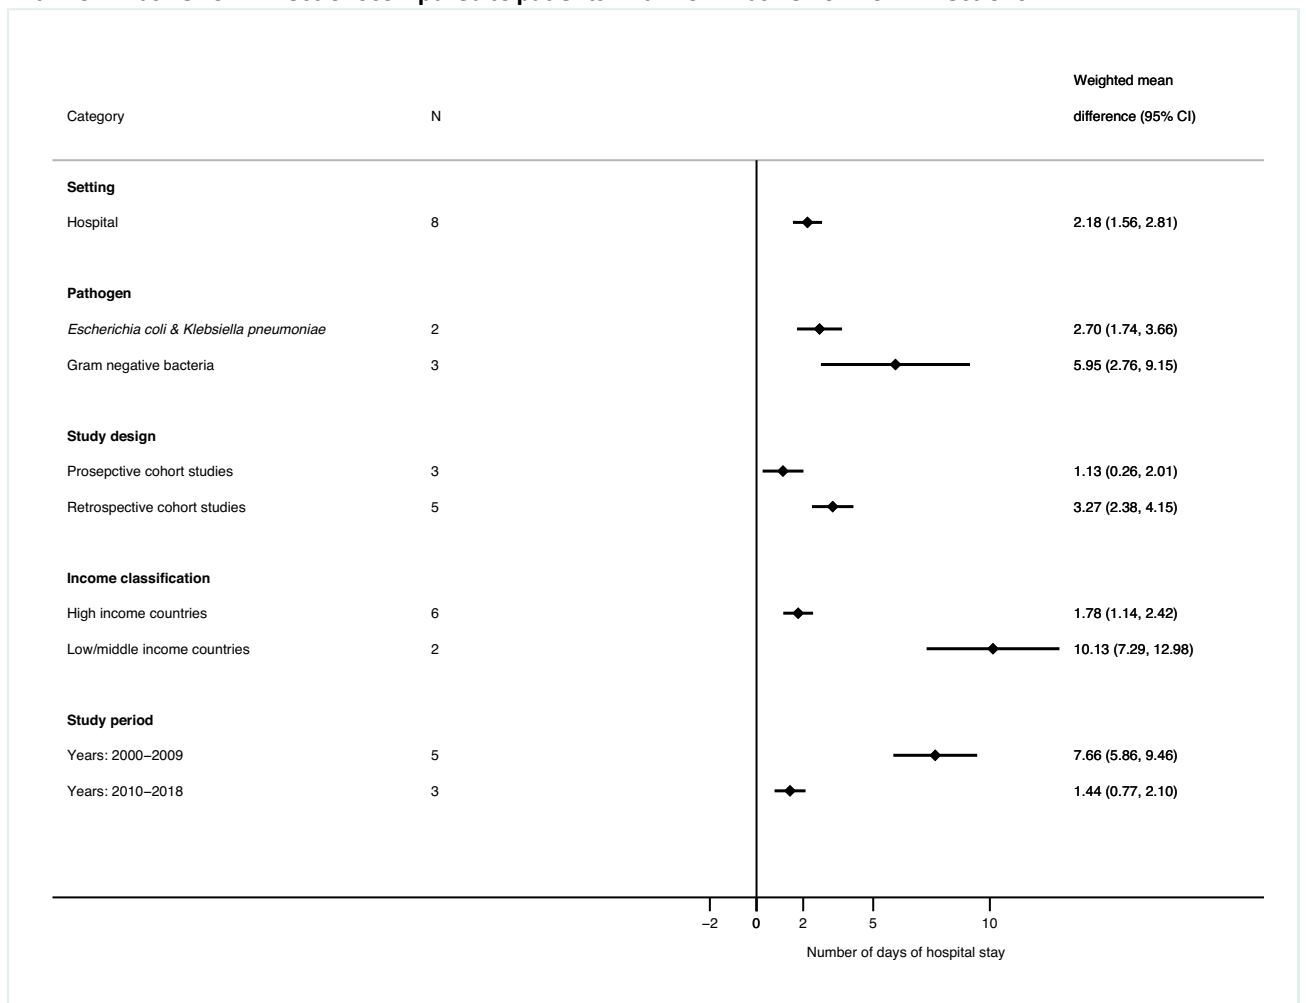

**Supplementary table S1: Search terms used in PubMed :**

((ESBL[tw] OR ""Extended spectrum beta-lactamase""[tw] OR ESBL[Mesh] OR ""Extended spectrum beta-lactamase"" [Mesh]) OR Extended spectrum ? lactamase[tw] OR Extended spectrum ? lactamase[Mesh] )

AND

(Escherichia Coli[Mesh] OR E.coli[Mesh] OR Escherichia Coli[tw] OR E.coli[tw]) ) OR (Klebsiella pneumoniae[Mesh] OR K.Pneumoniae[Mesh] OR Klebsiella pneumoniae[tw] OR K.Pneumoniae[tw])

**Coupled with**

(length of stay[mesh] OR (hospitalisation[tw] AND length[tw]) OR length of hospitalisation[tw] OR length of hospitalization[tw] OR duration of hospitalization[tw] duration of hospitalisation[tw] OR LOS[tw] OR ((period[tw] OR length[tw]) AND (hospital stay[tw] OR hospitalisation[tw] OR hospitalization[tw])) OR

(mortality[mesh] OR mortality[tw] OR death rate[tw] OR fatality[tw] OR survival rate[tw] OR death[tw] OR died[tw] OR dead[tw])) OR

(cost\*[Title/Abstract] OR "costs and cost analysis"[MeSH:noexp])

**Coupled with**

("0001/01/01"[PDat] : "2018/10/01"[PDat])

Supplementary table S2: Modified Newcastle Ottawa quality assessment scale for case-control studies and cohort studies.

| For case cohort studies, the quality criteria assessed are |                                                                            |     |                                                                                  |
|------------------------------------------------------------|----------------------------------------------------------------------------|-----|----------------------------------------------------------------------------------|
| 1                                                          | Is the case definition adequate?                                           | a*  | yes, with independent validation                                                 |
|                                                            |                                                                            | b   | yes, eg. record linkage or based on self-report                                  |
|                                                            |                                                                            | c   | no description                                                                   |
| 2                                                          | Representativeness of the cases                                            | a*  | consecutive or obviously representative series of cases                          |
|                                                            |                                                                            | b   | potential for selection biases or not stated                                     |
| 3                                                          | Selection of Controls                                                      | a*  | community controls                                                               |
|                                                            |                                                                            | b   | hospital controls                                                                |
|                                                            |                                                                            | c   | no description                                                                   |
| 4                                                          | Definition of Controls                                                     | a*  | no history of disease (endpoint)                                                 |
|                                                            |                                                                            | b   | no description of source                                                         |
| 5                                                          | Comparability of cases and controls on the basis of the design or analysis | a*  | study controls for at least one variable (including age, sex and comorbidities)  |
|                                                            |                                                                            | b** | study controls for more than one variable (including age, sex and comorbidities) |
| 6                                                          | Ascertainment of exposure                                                  | a*  | secure record (eg surgical records)                                              |
|                                                            |                                                                            | b   | structured interview blind to case/control status                                |
|                                                            |                                                                            | c   | interview not blinded to case/control status                                     |
|                                                            |                                                                            | d   | written self-report or medical record only                                       |
|                                                            |                                                                            | e   | no description                                                                   |
| 7                                                          | Same method of ascertainment for cases and controls                        | a*  | yes                                                                              |
|                                                            |                                                                            | b   | no                                                                               |
|                                                            |                                                                            | c   | unclear                                                                          |
| 8                                                          | Non-Response rate                                                          | a   | same rate for both groups                                                        |
|                                                            |                                                                            | b   | non respondents described                                                        |
|                                                            |                                                                            | c   | rate different and no designation                                                |
| For cohort studies, the quality criteria assessed are      |                                                                            |     |                                                                                  |
| 1                                                          | Representativeness of the exposed cohort                                   | a*  | truly representative                                                             |
|                                                            |                                                                            | b*  | somewhat representative                                                          |
|                                                            |                                                                            | c   | selected group of users                                                          |
|                                                            |                                                                            | d   | no description                                                                   |
| 2                                                          | Selection of the non-exposed cohort                                        | a*  | drawn from the same community as the exposed cohort                              |
|                                                            |                                                                            | b   | drawn from a different source                                                    |
|                                                            |                                                                            | c   | no description of the derivation of the non-exposed cohort                       |
| 3                                                          | Ascertainment of exposure                                                  | a*  | secure record (eg surgical records)                                              |
|                                                            |                                                                            | a*  | structured interview                                                             |
|                                                            |                                                                            | c   | written self-report                                                              |
|                                                            |                                                                            | d   | no description                                                                   |
| 4                                                          | Demonstration that outcome of interest was not present at start of study   | a*  | yes                                                                              |
|                                                            |                                                                            | b   | no                                                                               |
|                                                            |                                                                            | c   | unclear                                                                          |
| 5                                                          | Comparability of cohorts on the basis of the design or analysis            | a*  | study controls for age or comorbidities                                          |
|                                                            |                                                                            | b** | study controls for age and comorbidities                                         |
| 6                                                          | Assessment of outcome:                                                     | a*  | independent blind assessment                                                     |
|                                                            |                                                                            | b*  | record linkage                                                                   |
|                                                            |                                                                            | c   | self-report                                                                      |
|                                                            |                                                                            | d   | no description                                                                   |

|   |                                             |    |                                                                                                                                    |
|---|---------------------------------------------|----|------------------------------------------------------------------------------------------------------------------------------------|
| 7 | Follow-up long enough for outcomes to occur | a* | yes                                                                                                                                |
|   |                                             | b  | no                                                                                                                                 |
|   |                                             | c  | unclear                                                                                                                            |
| 8 | Adequacy of follow up of cohorts            | a* | complete follow up – all that matters subjects accounted for, subjects lost to follow up unlikely to introduce bias - small number |
|   |                                             | b* | inadequate numbers but description provided of those lost                                                                          |
|   |                                             | c  | inadequate follow up rate and no description of those lost                                                                         |
|   |                                             | d  | no statement                                                                                                                       |

Thresholds for converting the Newcastle-Ottawa scales to AHRQ standards (good, fair, and poor):

**Good quality:** 3 or 4 stars in selection domain AND 1 or 2 stars in comparability domain AND 2 or 3 stars in outcome/exposure domain

**Fair quality:** 2 stars in selection domain AND 1 or 2 stars in comparability domain AND 2 or 3 stars in outcome/exposure domain

**Poor quality:** 0 or 1 star in selection domain OR 0 stars in comparability domain OR 0 or 1 stars in outcome/exposure domain

EW Only

Supplementary table S3: Study characteristics overview

| Subgroup                                                                                                                  | All Studies | Bloodstream infections | Noninvasive infections |
|---------------------------------------------------------------------------------------------------------------------------|-------------|------------------------|------------------------|
|                                                                                                                           | <b>87</b>   | <b>57</b>              | <b>10</b>              |
| <b>Country</b>                                                                                                            |             |                        |                        |
| South Korea <sup>13,14,16,17,31,35,38,42,44,46,51,52,57,59</sup>                                                          | 14          | 9                      | 2                      |
| Thailand <sup>24,26,45,53-55,88</sup>                                                                                     | 7           | 3                      |                        |
| USA <sup>10,18,28,32,48,61,69</sup>                                                                                       | 7           | 2                      | 1                      |
| Spain <sup>36,40,58,62,70,91,93</sup>                                                                                     | 7           | 4                      | 2                      |
| Taiwan <sup>12,39,64,71,82,84,96</sup>                                                                                    | 7           | 5                      | 2                      |
| China <sup>60,73,74,76,86</sup>                                                                                           | 5           | 4                      |                        |
| Israel <sup>23,47,92,93</sup>                                                                                             | 4           | 3                      |                        |
| Germany <sup>10,40,43,63</sup>                                                                                            | 4           | 3                      |                        |
| Italy <sup>25,33,37</sup>                                                                                                 | 3           | 3                      |                        |
| Japan <sup>76,81,86</sup>                                                                                                 | 3           | 3                      |                        |
| Tanzania <sup>19,66,75</sup>                                                                                              | 3           | 3                      |                        |
| India <sup>49,50,80</sup>                                                                                                 | 3           | 1                      | 1                      |
| Canada <sup>65,67,85</sup>                                                                                                | 3           | 2                      |                        |
| UK <sup>22,30,89</sup>                                                                                                    | 3           | 3                      |                        |
| France <sup>68,79</sup>                                                                                                   | 2           | 1                      | 1                      |
| South Africa <sup>13,81</sup>                                                                                             | 2           | 1                      |                        |
| Brazil <sup>21,34</sup>                                                                                                   | 2           | 2                      |                        |
| Greece <sup>90</sup>                                                                                                      | 1           | 1                      |                        |
| Hungary <sup>95</sup>                                                                                                     | 1           | 1                      |                        |
| Lebanon <sup>27</sup>                                                                                                     | 1           | -                      |                        |
| Malaysia <sup>29</sup>                                                                                                    | 1           | -                      | 1                      |
| Mexico <sup>72</sup>                                                                                                      | 1           | 1                      |                        |
| Saudi Arabia <sup>20</sup>                                                                                                | 1           | 1                      |                        |
| Turkey <sup>78</sup>                                                                                                      | 1           | 1                      |                        |
|                                                                                                                           |             |                        |                        |
| <b>Continent</b>                                                                                                          |             |                        |                        |
| Asia <sup>12-14,16,17,20,23,24,25,27,29,31,35,38,39,42,44-47,49, 55,57,59,60,64,71,73,74,76,80-82,84,86-88,92,93,96</sup> | 46          | 29                     | 6                      |
| Europe <sup>11,22,25,30,33,35,37,40,41,43,58,62,63,68,70,78,79,89-91,94,95</sup>                                          | 22          | 17                     | 3                      |
| North America <sup>10,18,28,32,48,61,65,67,69,85</sup>                                                                    | 10          | 4                      | 1                      |
| Africa <sup>15,19,66,75,83</sup>                                                                                          | 5           | 4                      | -                      |
| South America <sup>21,34,72</sup>                                                                                         | 3           | 3                      | -                      |
| More than 1 continent <sup>56</sup>                                                                                       | 1           | -                      | -                      |

1  
2  
3  
4  
5  
6  
7  
8  
9  
10  
11  
12  
13  
14  
15  
16  
17  
18  
19  
20  
21  
22  
23  
24  
25  
26  
27  
28  
29  
30  
31  
32  
33  
34  
35  
36  
37  
38  
39  
40  
41  
42  
43  
44  
45  
46

|                                                                                                                                 |    |    |   |
|---------------------------------------------------------------------------------------------------------------------------------|----|----|---|
| <b>Income group</b>                                                                                                             |    |    |   |
| High-income countries <sup>10-14,16-18,20,22,23,25,28,30-33,35-44,46-48,51,52,57-59,61-65,67-71,76,79,81,82,84-86,89-96,</sup>  | 60 | 41 | 8 |
| Low- and middle-income countries <sup>15,19,21,23,25,27,29,34,45,50,53-55,60,66,72-75,77,78,80,83,87,88</sup>                   | 26 | 16 | 2 |
| High-income countries AND Low- and middle-income countries <sup>56</sup>                                                        | 1  | -  | - |
| <b>Study design</b>                                                                                                             |    |    |   |
| Case cohort study <sup>10,12,24-28,31,40,44,46,55,58,61,63-65,67-69,85-87</sup>                                                 | 24 | 14 |   |
| Retrospective cohort study <sup>11,13-17,20,21,23,29,33-38,41-43,45,47,48,50-54,59,60,71,73,74,76-78,81-84,88,89,93,95,96</sup> | 44 | 32 |   |
| Prospective cohort study <sup>18,19,30,32,39,49,56,62,66,70,72,75,79,80,90-92,94</sup>                                          | 18 | 11 |   |
| <b>Year group</b>                                                                                                               |    |    |   |
| 1991-1999 <sup>10,60,15,16,17,62,21,25,28,36,46,93,94</sup>                                                                     | 13 | 10 | - |
| 2000-2009 <sup>11-14,18-20,22-24,26,27,29-35,37-45,47,49-52,54,55,57,58,61,63,64,67-69,89-92,95,96</sup>                        | 49 | 31 | 6 |
| 2010-2018 <sup>48,53,54,59,65,66,70-88</sup>                                                                                    | 25 | 16 | 4 |
| <b>Pathogen</b>                                                                                                                 |    |    |   |
| <i>Escherichia coli</i> <sup>11,24,30,33,35-37,40,43,45,52,55,58,59,68,70,71,73,76,86,87,91,94</sup>                            | 23 | 16 | 3 |
| <i>Klebsiella pneumoniae</i> <sup>15,16,20,21,25,29,32,34,41,43,47,61,62,74,78,83,95,96</sup>                                   | 17 | 11 | 1 |
| <i>E. coli</i> and <i>K. pneumoniae</i> <sup>10,13,14,17,26,28,38,43,44,46,48,50,51,54,57,60,63,69,85,88,89</sup>               | 20 | 13 | 2 |
| Gram-negative bacteria <sup>12,18,19,22,23,27,31,39,42,49,53,56,64-67,72,75,77,79-82,84,90,92,93</sup>                          | 27 | 17 | 4 |
| <b>Study setting</b>                                                                                                            |    |    |   |
| Entire hospital <sup>10,11,16,18,20-27,29,30,33-38,40-46,48-50,52-55,58-60,62,65-69,73,74,76,82,85,86,90-96</sup>               | 57 | 40 | 7 |
| Intensive care unit <sup>32,61,64,75,79-81,88,89</sup>                                                                          | 9  | 5  | 1 |
| Pediatric ward <sup>17,19,28,51,57,78,83,88</sup>                                                                               | 8  | 7  | - |
| Neonatal ward <sup>15,61,64,71,75</sup>                                                                                         | 5  | 3  | - |
| Neonatal intensive care unit <sup>61,64,75</sup>                                                                                | 3  | 2  | - |
| Medical ward <sup>13,39,70</sup>                                                                                                | 3  | -  | 2 |
| Not provided <sup>31,47</sup>                                                                                                   | 2  | -  | - |
| Emergency Department <sup>12,84</sup>                                                                                           | 2  | 2  | - |
| Surgical ward <sup>32,56</sup>                                                                                                  | 2  | -  | - |
| Burn unit <sup>32</sup>                                                                                                         | 1  | -  | - |
| Oncology <sup>72</sup>                                                                                                          | 1  | 1  | - |
| Referral centre for hepatopancreaticobiliary diseases <sup>77</sup>                                                             | 1  | -  | - |
| Hematological <sup>14</sup>                                                                                                     | 1  | 1  | - |

|                                                                                                                                                                 |    |    |   |
|-----------------------------------------------------------------------------------------------------------------------------------------------------------------|----|----|---|
| <b>Study population</b>                                                                                                                                         |    |    |   |
| All kinds of patients <sup>10-13,14,18,20-27,29,30,34,35,39-41,43-46,48-50,52-56,58,60,62,63,65-69,76,82,84-86,90,92-95</sup>                                   | 55 | 36 | 7 |
| Intensive care unit patients <sup>32,79-81,87,89</sup>                                                                                                          | 6  | 3  | 1 |
| Children <sup>17,19,28,51,57,78,83,88</sup>                                                                                                                     | 8  | 7  | - |
| Neonates <sup>15,61,64,71,75</sup>                                                                                                                              | 5  | 3  | - |
| Cancer patients <sup>33,51,59,72,91</sup>                                                                                                                       | 5  | 5  | - |
| Immunocompromised patients <sup>51</sup>                                                                                                                        | 1  | 1  | - |
| Diabetic patients <sup>96</sup>                                                                                                                                 | 1  | 1  | - |
| Elderly patients <sup>70</sup>                                                                                                                                  | 1  | -  | 1 |
| Patients with chemotherapy/stem cell transplantation <sup>14,91</sup>                                                                                           | 2  | 2  | - |
| Patients after prostatitis biopsy <sup>42</sup>                                                                                                                 | 1  | -  | 1 |
| Lungs transplantation patients <sup>47</sup>                                                                                                                    | 1  | -  | - |
| Hematological patients <sup>73</sup>                                                                                                                            | 1  | 1  | - |
| All except cardiothoracic therapy, transplant surgery, burns <sup>74</sup>                                                                                      | 1  | 1  |   |
| Patients with pyogenic liver abscess <sup>77</sup>                                                                                                              | 1  | -  | - |
| <b>Data reported</b>                                                                                                                                            |    |    |   |
| Treatment information <sup>10,12-13,23-25,30-38,40,44-49,51,52,54-65,67,68,70-96</sup>                                                                          | 74 | 50 | 6 |
| Appropriateness of treatment <sup>10,12-14,16,17,19-21,23-26,30-38,40,44-46,48,49,51,52,54-56,58-60,62-65,67,68,70,72-74,76,77,79,81,83-86,89-96</sup>          | 62 | 45 | 5 |
| Empirical therapy <sup>14,16,17,24,25,33,35-38,40,44,51,52,56,58,59,63,76,81,83,94</sup>                                                                        | 22 | 16 | 2 |
| Treatment outcome <sup>10,12-21,25,26,30-38,40,44-49,51,52,54-57,59-65,67,68,72-74,76,78-81,83-86,88-92,94-96</sup>                                             | 64 | 45 | 3 |
| Minimum inhibitory concentration results <sup>10,11,13,14,16-19,22-25,27,28,32,33,35-41,43,44,47,50-52,54-59,62,63,66,68,69,76-78,80,81,83,85-87,89,94,95</sup> | 52 | 34 | 4 |
| AmpC genotyping <sup>10,11,17,32,41,46,50,56,57,65,66,70,86</sup>                                                                                               | 13 | 6  | 2 |

Supplementary table S4: Characteristics for each study

|                                  | Years     | Country                                               | Study design                | Control group      | Study population                                                                          | Setting                    | Outcome definition           | Main objective                                                                                                                                                                                                       | Pathogen |
|----------------------------------|-----------|-------------------------------------------------------|-----------------------------|--------------------|-------------------------------------------------------------------------------------------|----------------------------|------------------------------|----------------------------------------------------------------------------------------------------------------------------------------------------------------------------------------------------------------------|----------|
| Lautenbach E <sup>10</sup>       | 1997-1998 | USA                                                   | Case cohort study           | Non-ESBL-infection | All kinds of patients                                                                     | Entire hospital            | Attributable mortality; LOS  | Risk factors for infection with ESBL-producing pathogens, difference in clinical outcomes of infections: resistant vs. susceptible organisms                                                                         | EC, KP   |
| Kim SH <sup>14</sup>             | 2007-2008 | South Korea                                           | Cohort study, Retrospective | Non-ESBL-infection | Patients who received either chemotherapy or stem cell transplantation; neutropenic fever | Hematological ward, Others | All-cause mortality (28 day) | Risk factors for acquisition of ESBL, appropriateness of empirical antimicrobial therapy, clinical outcomes in relation to ESBL production                                                                           | EC, KP   |
| Chayakulkeere M <sup>53</sup>    | 2015-2015 | Thailand                                              | Cohort study, Retrospective | Non-ESBL-infection | All kinds of patients                                                                     | Entire hospital            | All-cause mortality          | Prevalence & risk factors for infections with & antibiotic susceptibility patterns of & outcomes of patients infected with ESBL-producing-GNB                                                                        | GNB      |
| Pisarntharak A <sup>54</sup>     | 2003-2007 | Thailand                                              | Cohort study, Retrospective | Non-ESBL-infection | All kinds of patients                                                                     | Entire hospital            | All-cause mortality, LOS     | Predictors for mortality associated with community-onset BSI with ESBL-producing pathogens, initial empirical antimicrobial regimens, associated hospital resource utilisation, costs accrued after diagnosis of BSI | EC, KP   |
| Pisarntharak A <sup>55</sup>     | 2003-2004 | Thailand                                              | Case cohort study           | Non-ESBL-infection | All kinds of patients                                                                     | Entire hospital            | All-cause mortality, LOS     | Mortality associated with community-onset infection due to ESBL-producing pathogens, associated hospital resource use, post-infection hospital cost                                                                  | EC       |
| Jean SS <sup>56</sup>            | 2010-2011 | Portugal, Columbia, the Philippines, Taiwan, Thailand | Cohort study, prospective   | Non-ESBL-infection | All kinds of patients                                                                     | Surgical ward              | Attributable mortality, LOS  | Clinical impact on hospitalised patients with community-acquired complicated intra-abdominal infection: ESBL-producing- vs. non-ESBL-producing pathogens                                                             | GNB      |
| Lee J <sup>57</sup>              | 1999-2005 | South Korea                                           | interventional studies      | Non-ESBL-infection | Children                                                                                  | Pediatric ward             | All-cause mortality (28 day) | impact of a change in antibiotic policy on ESBL-prevalence                                                                                                                                                           | EC, KP   |
| Briongos-Figuero A <sup>58</sup> | 2009-2010 | Spain                                                 | Case cohort study           | Non-ESBL-infection | All kinds of patients                                                                     | Entire hospital            | All-cause mortality          | Characteristics & associated risk factors for EBSL-enterobacteria-UTIs                                                                                                                                               | EC       |
| Ha YE <sup>59</sup>              | 2010-2012 | South Korea                                           | Cohort study, retrospective | Non-ESBL-infection | Patients with cancer                                                                      | Entire hospital            | All-cause mortality (28 day) | Clinical & molecular epidemiology of ESBL-EC bacteraemia, clinical impact of ESBLs on patient outcome                                                                                                                | EC       |
| Du B <sup>60</sup>               | 1997-1999 | China                                                 | Cohort study, retrospective | Non-ESBL-infection | All kinds of patients                                                                     | Entire hospital            | All-cause mortality          | Risk factors for nosocomial ESBL-EC- and ESBL-KP- bacteraemia & influence on patient outcome.                                                                                                                        | EC, KP   |



1  
2  
3  
4  
5  
6  
7  
8  
9  
10  
11  
12  
13  
14  
15  
16  
17  
18  
19  
20  
21  
22  
23  
24  
25  
26  
27  
28  
29  
30  
31  
32  
33  
34  
35  
36  
37  
38  
39  
40  
41  
42  
43  
44  
45  
46

|                              | Years     | Country      | Study design                | Control group                                                                      | Study population      | Setting         | Outcome definition                               | Main objective                                                                                                                                                                                                                                                                                                                                                                                                                                                                                                    | Pathogen |
|------------------------------|-----------|--------------|-----------------------------|------------------------------------------------------------------------------------|-----------------------|-----------------|--------------------------------------------------|-------------------------------------------------------------------------------------------------------------------------------------------------------------------------------------------------------------------------------------------------------------------------------------------------------------------------------------------------------------------------------------------------------------------------------------------------------------------------------------------------------------------|----------|
| Stone PW <sup>61</sup>       | 2001      | USA          | Case cohort study           | Non-ESBL-infection                                                                 | Neonates at NICU      | NICU            | LOS                                              | costs of interventions aimed at controlling the outbreak, attributable length of stay associated with infection and colonisation with ESBL-KP                                                                                                                                                                                                                                                                                                                                                                     | KP       |
| Pillay T <sup>15</sup>       | 1995-1996 | South Africa | Cohort study, retrospective | Non-ESBL-infection                                                                 | Neonates              | Neonatal ward   | All-cause mortality                              | Use of piperacillin/tazobactam in treatment of KP- infection                                                                                                                                                                                                                                                                                                                                                                                                                                                      | KP       |
| Kim BN <sup>16</sup>         | 1999-2000 | South Korea  | Cohort study, retrospective | Non-ESBL-infection                                                                 | All kinds of patients | Entire hospital | Attributable mortality, LOS                      | Prevalence & clinical characteristics of ESBL-KP- bacteraemia, impact of ESBL- production on outcome of patients with KP- bacteraemia in endemic situation.                                                                                                                                                                                                                                                                                                                                                       | KP       |
| Kim YK <sup>17</sup>         | 1993-1998 | South Korea  | Cohort study, retrospective | Non-ESBL-infection                                                                 | Children              | Pediatric ward  | All-cause mortality                              | Risk factors & clinical outcomes & clinical responses to treatment of ESBL-EC- and ESBL-KP-bacteraemia, prevalence and types of their ESBLs                                                                                                                                                                                                                                                                                                                                                                       | EC, KP   |
| Bhavnani SM <sup>18</sup>    | 2001-2002 | USA          | Cohort study, prospective   | Non-ESBL-infection                                                                 | All kinds of patients | Entire hospital | Attributable mortality, all-cause mortality      | Risk factors for occurrence of invasive ESBL-EC- and ESBL-KP-infections, factors associated with clinical outcome, drug regimens for treatment of infections associated ESBL/non-ESBL strains in real-life clinical practice, clinical response rates for patients treated with cephalosporins/other classes of antimicrobial agents, /carbapenems, clinical response for those patients with infection associated with ESBL and non-ESBL-producing strains with MIC values V8 Ag/mL treated with cephalosporins. | GNB      |
| Blomberg B <sup>19</sup>     | 2001-2002 | Tanzania     | Cohort study, prospective   | Non-ESBL-infection                                                                 | Neonates, children    | Pediatric ward  | All-cause mortality                              | Prevalence & clinical implications of ESBL production in EC-,KP-, Salmonellae- septicemia                                                                                                                                                                                                                                                                                                                                                                                                                         | GNB      |
| Pená C <sup>62</sup>         | 1993-1995 | Spain        | Cohort study, prospective   | Non-ESBL-infection                                                                 | All kinds of patients | Entire hospital | Attributable mortality, all-cause mortality      | Clinical epidemiology& outcome of ESBL-KP- bacteraemia, relevance of ESBL strains in mortality of patients with hospital-acquired KP-BSI.                                                                                                                                                                                                                                                                                                                                                                         | KP       |
| Kola A <sup>63</sup>         | 2002-2004 | Germany      | Case cohort study           | Non-ESBL-infection                                                                 | All kinds of patients | Entire hospital | All-cause mortality, LOS, ICU-LOS                | Outcomes of ESBL-EC- and ESBL-KP-infections                                                                                                                                                                                                                                                                                                                                                                                                                                                                       | EC, KP   |
| Isai MH <sup>64</sup>        | 2001-2012 | Taiwan       | Case cohort study           | Control group: non-ESBL-infection, second control group: all hospitalised patients | Neonates at NICU      | NICU            | Attributable mortality, all-cause mortality, LOS | Clinical features& risk factors& molecular epidemiology of ESBL-GNB                                                                                                                                                                                                                                                                                                                                                                                                                                               | GNB      |
| Maslikowska JA <sup>65</sup> | 2010-2013 | Canada       | Case cohort study           | Non-ESBL-infection                                                                 | All kinds of patients | Entire hospital | Attributable mortality, all-cause mortality, LOS | Differences in clinical & microbiological outcome, mortality, and/or hospital resource use: ESBL-EC- and ESBL-Ks- vs non-ESBL-EC- and non-ESBL-Ks-infections                                                                                                                                                                                                                                                                                                                                                      | GNB      |

1  
2  
3  
4  
5  
6  
7  
8  
9  
10  
11  
12  
13  
14  
15  
16  
17  
18  
19  
20  
21  
22  
23  
24  
25  
26  
27  
28  
29  
30  
31  
32  
33  
34  
35  
36  
37  
38  
39  
40  
41  
42  
43  
44  
45  
46

|                                 | Years     | Country                 | Study design                | Control group                                                            | Study population      | Setting          | Outcome definition                                        | Main objective                                                                                                                                                                                     | Pathogen |
|---------------------------------|-----------|-------------------------|-----------------------------|--------------------------------------------------------------------------|-----------------------|------------------|-----------------------------------------------------------|----------------------------------------------------------------------------------------------------------------------------------------------------------------------------------------------------|----------|
| Onken A <sup>66</sup>           | 2012-2013 | Tanzania                | Cohort study, prospective   | Non-ESBL-infection                                                       | All kinds of patients | Entire hospital  | All-cause mortality                                       | Most common bacterial pathogens causing BSI, antimicrobial susceptibility                                                                                                                          | GNB      |
| Nguyen ML <sup>67</sup>         | 2005-2010 | Canada                  | Case cohort study           | Non-ESBL-infection                                                       | All kinds of patients | Entire hospital  | All-cause mortality, LOS, ICU-LOS                         | Risk factors for & patient outcomes associated with ESBL-EC- and ESBL-Ks- bacteraemia, appropriateness of empiric antibiotic therapy & effect of inappropriate empiric therapy on outcomes         | GNB      |
| Denis B <sup>68</sup>           | 2005-2009 | France                  | Case-control study          | Non-ESBL-infection                                                       | All kinds of patients | Entire hospital  | All-cause mortality (28 day), LOS                         | Prevalence & risk factors for ESBL-EC bacteraemia, impact on length of stay & 30day mortality                                                                                                      | EC       |
| Chopra T <sup>69</sup>          | 2004-2009 | USA                     | Case cohort study           | Case 2(Control1): non-ESBL-infection, second control group: no infection | All kinds of patients | Entire hospital  | All-cause mortality (28 day)                              | Predictors of ESBL-EC- and ESBL-KP-BSI, focus on cefepime exposure.                                                                                                                                | EC, KP   |
| Panhotra BR <sup>20</sup>       | 2001-2003 | Kingdom of Saudi Arabia | Case cohort study           | Non-ESBL-infection                                                       | All kinds of patients | Entire hospital  | All-cause mortality                                       | Risk factors & clinical outcome of ESBL-KP-bacteraemia (hospital acquired)                                                                                                                         | KP       |
| Marra AR <sup>21</sup>          | 1996-2001 | Brazil                  | Cohort study, retrospective | Non-ESBL-infection                                                       | All kinds of patients | Entire hospital  | All-cause mortality (14 day)                              | ESBL-KP- associated mortality                                                                                                                                                                      | KP       |
| Skippen I <sup>22</sup>         | 2003-2005 | UK                      | Case cohort study           | Non-ESBL-infection                                                       | All kinds of patients | Entire hospital  | All-cause mortality                                       | Risk factors for & outcomes of ESBL-EC- and ESBL-KP-invasive transmission of organism in the healthcare setting                                                                                    | GNB      |
| Schwaber MJ <sup>23</sup>       | 2000-2003 | Israel                  | Cohort study, retrospective | Non-ESBL-infection                                                       | All kinds of patients | Entire hospital  | Attributable mortality, all-cause mortality               | Outcomes of ESBL-production in Enterobacteriaceae-bacteraemia.                                                                                                                                     | GNB      |
| Apisarnthanarak A <sup>24</sup> | 2003-2004 | Thailand                | Case cohort study           | Control group: non-ESBL-infection, second control group: no infection    | All adult patients    | Entire hospital  | All-cause mortality, LOS                                  | Clinical & molecular epidemiologic factors associated with community onset ESBL-EC- infections, hospital resource utilisation, estimate costs associated with medical care (hospitalised patients) | EC       |
| Umbarello M <sup>25</sup>       | 1999-2003 | Italy                   | Case cohort study           | Non-ESBL-infection                                                       | All kinds of patients | Entire hospital  | Attributable mortality, all-cause mortality, LOS, ICU-LOS | Factors associated with isolation of ESBL- KP-strains                                                                                                                                              | KP       |
| Teistner R <sup>11</sup>        | 2008-2010 | Germany                 | Cohort study, retrospective | Non-ESBL-infection                                                       | All kinds of patients | Entire hospital, | All-cause mortality, LOS                                  | Difference in mortality: ESBL-EC-BSIs vs. non-ESBL-EC-BSIs, molecular epidemiology of ESBL-positive isolates                                                                                       | EC       |

1  
2  
3  
4  
5  
6  
7  
8  
9  
10  
11  
12  
13  
14  
15  
16  
17  
18  
19  
20  
21  
22  
23  
24  
25  
26  
27  
28  
29  
30  
31  
32  
33  
34  
35  
36  
37  
38  
39  
40  
41  
42  
43  
44  
45  
46

|                               | Years     | Country     | Study design                | Control group                                                         | Study population                                | Setting                       | Outcome definition                | Main objective                                                                                                                                                                                                                                                            | Pathogen |
|-------------------------------|-----------|-------------|-----------------------------|-----------------------------------------------------------------------|-------------------------------------------------|-------------------------------|-----------------------------------|---------------------------------------------------------------------------------------------------------------------------------------------------------------------------------------------------------------------------------------------------------------------------|----------|
| Apisarntharak A <sup>26</sup> | 2003-2004 | Thailand    | Case cohort study           | Control group: non-ESBL-infection, second control group: no infection | All kinds of patients                           | Entire hospital               | All-cause mortality, LOS          | Risk factors for & outcomes of ESBL-EC- and ESBL-KP-infections (healthcare associated)                                                                                                                                                                                    | EC, KP   |
| Kanafani ZA <sup>27</sup>     | 2003      | Lebanon     | Case cohort study           | Non-ESBL-infection                                                    | All kinds of patients                           | Entire hospital               | All-cause mortality, LOS          | Epidemiology of infections with ESBL-EC and ESBL-Ks at AUBMC risk factors & outcomes of infections - focus on effect of prior antibiotic administration & the risks imparted by specific classes of antimicrobial agents                                                  | GNB      |
| Zaoutis TE <sup>28</sup>      | 1999-2003 | USA         | Case cohort study           | Non-ESBL-infection                                                    | Children                                        | Entire hospital               | All-cause mortality, LOS          | Risk factors & outcomes associated with ESBL-EC-and ESBL-KP-BSI                                                                                                                                                                                                           | EC, KP   |
| Goh LC <sup>29</sup>          | 2003-2004 | Malaysia    | Cohort study, retrospective | Non-ESBL-infection                                                    | All kinds of patients                           | Entire hospital               | All-cause mortality, LOS          | Impact of ESBL-KP-respiratory tract infections on hospital mortality, requirement for mechanical ventilation & length stay                                                                                                                                                | KP       |
| Melzer M <sup>30</sup>        | 2003-2005 | UK          | Cohort study, prospective   | Non-ESBL-infection                                                    | All kinds of patients                           | Entire hospital               | All-cause mortality               | Differences in mortality & length of hospital stay & time from bacteraemia to death in patients with ESBL-EC- vs. non-ESBL-EC-bacteremic-infection                                                                                                                        | EC       |
| Song KH <sup>31</sup>         | 2000-2006 | South Korea | Case cohort study           | Non-ESBL-infection                                                    | Patients with spontaneous bacterial peritonitis | Not provided                  | All-cause mortality (28 day)      | Outcomes of ESBL-EC-and ESBL-Ks- vs non-ESBL-EC-and ESBL-Ks-SBP (based on isolation from ascites), impact of ineffective initial antimicrobial therapy on outcome in patients with ESBL-EC- and ESBL-Ks-SBP, risk factors for infection by ESBL-producing microorganisms. | GNB      |
| Bennett JW <sup>32</sup>      | 2004-2008 | USA         | Cohort study, prospective   | Non-ESBL-infection                                                    | ICU-patients                                    | ICU, Surgical ward, Burn unit | All-cause mortality (28 day)      | ESBL types and strain variability, presence of host factors to determine potential role in morbidity and mortality during ESBL-KP-infections                                                                                                                              | KP       |
| Recarichi EM <sup>33</sup>    | 2000-2007 | Italy       | Cohort study, retrospective | Non-ESBL-infection                                                    | Patients with hematological malignancies        | Entire hospital               | All-cause mortality (28 day)      | Risk factors for mortality in patients suffering from hematological malignancies with concurrent EC-bacteraemia. Focus on impact of ESBL- production & fluoroquinolone resistance by bacterial isolates                                                                   | EC       |
| Fuon FF <sup>34</sup>         | 2006-2009 | Brazil      | Cohort study, retrospective | Non-ESBL-infection                                                    | All kinds of patients                           | Entire hospital               | All-cause mortality (28 day), LOS | Risk factors & mortality rate in ESBL-KP-bacteraemia                                                                                                                                                                                                                      | KP       |
| Kang CI <sup>35</sup>         | 2008-2009 | South Korea | Cohort study, retrospective | Non-ESBL-infection                                                    | All kinds of patients                           | Entire hospital               | All-cause mortality (28 day)      | Risk factors of ESBL-EC among community-onset bacteraemia, treatment outcomes                                                                                                                                                                                             | EC       |

1

2

3

4

5

6

7

8

9

10

11

12

13

14

15

16

17

18

19

20

21

22

23

24

25

26

27

28

29

30

31

32

33

34

35

36

37

38

39

40

41

42

43

44

45

46

|                                | Years     | Country     | Study design                | Control group      | Study population                  | Setting                                           | Outcome definition                                                 | Main objective                                                                                                                                                                                                          | Pathogen |
|--------------------------------|-----------|-------------|-----------------------------|--------------------|-----------------------------------|---------------------------------------------------|--------------------------------------------------------------------|-------------------------------------------------------------------------------------------------------------------------------------------------------------------------------------------------------------------------|----------|
| Pena C <sup>36</sup>           | 1996-2003 | Spain       | Cohort study, retrospective | Non-ESBL-infection | All kinds of patients             | Entire hospital                                   | All-cause mortality (28 day)                                       | Risk factors for mortality among patients with EC- infections                                                                                                                                                           | EC       |
| Tumbarello M <sup>37</sup>     | 2006      | Italy       | Cohort study, retrospective | Non-ESBL-infection | All kinds of patients             | ICU, Medical ward, Entire hospital, surgical wide | All-cause mortality (21 day), LOS                                  | Clinical & economic impacts of ESBL production, inadequate Initial Antibiotic Therapy of EC-BSI                                                                                                                         | EC       |
| Kang C <sup>38</sup>           | 2006-2009 | South Korea | Case cohort study           | Non-ESBL-infection | All kinds of patients             | Entire hospital                                   | Attributable mortality, all-cause mortality (28 day)               | Impact of ESBL-producing bacteraemia on outcome in patients with hematologic malignancy.                                                                                                                                | EC, KP   |
| Wu YH <sup>39</sup>            | 2009-2012 | Taiwan      | Cohort study, prospective   | Non-ESBL-infection | All kinds of patients             | Medical ward                                      | LOS                                                                | Host-related risk factors for community-onset UTI due to levofloxacin- or cefazolin-nonsusceptible isolates or uropathogens with ESBL production, clinical impact of UTIs due to antimicrobial-nonsusceptible pathogens | GNB      |
| Rodriguez-Bano J <sup>40</sup> | 2004-2006 | Spain       | Case cohort study           | Non-ESBL-infection | All kinds of patients             | Entire hospital                                   | All-cause mortality (14 day)                                       | Epidemiology & risk factors (focus on previous antimicrobial use) & mortality rate for patients with ESBL-EC-COBSI                                                                                                      | EC       |
| Gürttnke S <sup>41</sup>       | 2008-2011 | Germany     | Cohort study, retrospective | Non-ESBL-infection | All kinds of patients             | Entire hospital                                   | All-cause mortality, LOS                                           | Distribution of ESBL genotypes, hospital mortality in cases of ESBL-KP-BSI                                                                                                                                              | KP       |
| Oh MM <sup>42</sup>            | 2006-2011 | South Korea | Cohort study, retrospective | Non-ESBL-infection | Patients after Prostatitis Biopsy | Entire hospital                                   | LOS                                                                | Impact of ESBL-positive-strains on clinical course & progression to chronic prostatitis in patients with postbiopsy acute prostatitis.                                                                                  | GNB      |
| Leistner R <sup>43</sup>       | 2008-2011 | Germany     | Cohort study, retrospective | Non-ESBL-infection | All kinds of patients             | Entire hospital                                   | All-cause mortality, LOS                                           | Financial disease burden attributable to ESBL-positive species in cases of EC-and KP-BSI                                                                                                                                | EC, KP   |
| Lin JN <sup>42</sup>           | 2005-2009 | Taiwan      | Case cohort study           | Non-ESBL-infection | All kinds of patients             | Emergency Room                                    | Attributable mortality, all-cause mortality (28 day), LOS, ICU-LOS | Clinical & microbiological characteristics, risk factors for acquisition of infection, prescription of initial empirical antibiotics mortality rate of infection                                                        | GNB      |
| Ku NS <sup>44</sup>            | 2006-2010 | South Korea | Case cohort study           | Non-ESBL-infection | All kinds of patients             | Entire hospital                                   | All-cause mortality (28 day)                                       | Clinical usefulness of breakpoints for treatment of Enterobacteriaceae-bacteraemia, (focus on EC- and Ks-bacteraemia): CLSI 2009- vs. CLSI 2010-guidelines.                                                             | EC, KP   |

1  
2  
3  
4  
5  
6  
7  
8  
9  
10  
11  
12  
13  
14  
15  
16  
17  
18  
19  
20  
21  
22  
23  
24  
25  
26  
27  
28  
29  
30  
31  
32  
33  
34  
35  
36  
37  
38  
39  
40  
41  
42  
43  
44  
45  
46

|                             | Years     | Country     | Study design                | Control group                                                         | Study population                                             | Setting         | Outcome definition                                   | Main objective                                                                                                                                                                                                                        | Pathogen |
|-----------------------------|-----------|-------------|-----------------------------|-----------------------------------------------------------------------|--------------------------------------------------------------|-----------------|------------------------------------------------------|---------------------------------------------------------------------------------------------------------------------------------------------------------------------------------------------------------------------------------------|----------|
| Anunnatsiri S <sup>45</sup> | 2005-2006 | Thailand    | Cohort study, retrospective | Non-ESBL-infection                                                    | All kinds of patients                                        | Entire hospital | All-cause mortality, LOS                             | Incidence of ESBL-EC-septicemia, factors associated with infection & clinical outcomes                                                                                                                                                | EC       |
| Kang CI <sup>46</sup>       | 1998-2002 | South Korea | Case cohort study           | Non-ESBL-infection                                                    | All kinds of patients                                        | Hospital-wide   | All-cause mortality (28 day)                         | Risk factors for mortality & treatment outcome of ESBL-EC- and ESBL-KP-BSI                                                                                                                                                            | EC, KP   |
| Raviv Y <sup>47</sup>       | 2004-2007 | Israel      | Cohort study, retrospective | Control group: non-ESBL-infection, second control group: no infection | patients with lung transplantation                           | Not provided    | All-cause mortality (28 day)                         | Outcomes of lung transplant recipients infected by CRKP and ESBL carbapenem-sensitive KP (referred to MDR-KP)                                                                                                                         | KP       |
| Kim HJ <sup>13</sup>        | 2005-2010 | South Korea | Cohort study, retrospective | Non-ESBL-infection                                                    | All kinds of patients                                        | Medical ward    | All-cause mortality (28 day), LOS                    | Clinical outcome of patients with biliary tract infection: ESBL-producing bacterial isolates vs. non-ESBL-producing-bacterial isolates, predictors of poor prognosis, impact of ineffective antimicrobial therapy on clinical outcome | EC, KP   |
| MacVane SH <sup>48</sup>    | 2011-2012 | USA         | Cohort study, retrospective | Non-ESBL-infection                                                    | All kinds of patients                                        | Entire hospital | Attributable mortality, all-cause mortality, LOS     | clinical & economic outcomes of patients with ESBL-EC- and ESBL-KP-UTI vs. non-ESBL-EC- and non-ESBL-KP-UTI                                                                                                                           | EC, KP   |
| Abhilash KP <sup>49</sup>   | 2007      | India       | Cohort study, prospective   | Non-ESBL-infection                                                    | All kinds of patients                                        | Entire hospital | All-cause mortality (14 day)                         | Prevalence & risk factors & outcome of antibiotic treatment among hospitalised patients with ESBL-EC- and ESBL-Ks-BSI                                                                                                                 | GNB      |
| Rhantni M <sup>50</sup>     | 2006      | India       | Cohort study, retrospective | Non-ESBL-infection                                                    | All kinds of patients                                        | Entire hospital | All-cause mortality, LOS                             | Prevalence & impact on clinical outcome of ESBL-production among nosocomial isolates of EC & KP                                                                                                                                       | EC, KP   |
| Han SB <sup>51</sup>        | 2009-2013 | South Korea | Cohort study, retrospective | Non-ESBL-infection                                                    | Children (immunocompromised, with cancer, neutropenic fever) | Pediatric ward  | Attributable mortality, all-cause mortality (28 day) | Clinical outcomes of ESBL-EC- and ESBL-KP-bacteraemia & their antibiotic susceptibilities                                                                                                                                             | EC, KP   |
| Lee S <sup>52</sup>         | 2009-2011 | South Korea | Cohort study, retrospective | Non-ESBL-infection                                                    | Patients with Acute Pyelonephritis                           | Entire hospital | All-cause mortality (14 day), LOS                    | Impact of ESBL on clinical outcomes of Acute Pyelonephritis treated with empirical ceftriaxone (which was inappropriate for ESBL-producing organisms)                                                                                 | EC       |
| Artero A <sup>70</sup>      | 2013-2015 | Spain       | Cohort study, prospective   | Non-ESBL-infection                                                    | Elderly                                                      | Medical ward    | All-cause mortality, LOS                             | Identify clinical factors to predict ESBL-EC among elderly patients with UTI admitted to hospital in a high rate setting of ESBL-EC                                                                                                   | EC       |

|                                   | Years     | Country  | Study design                | Control group      | Study population                                                                                        | Setting                                      | Outcome definition                | Main objective                                                                                                                                                                                               | Pathogen         |
|-----------------------------------|-----------|----------|-----------------------------|--------------------|---------------------------------------------------------------------------------------------------------|----------------------------------------------|-----------------------------------|--------------------------------------------------------------------------------------------------------------------------------------------------------------------------------------------------------------|------------------|
| Chen IL <sup>71</sup>             | 2004-2015 | Taiwan   | Cohort study, retrospective | Non-ESBL-infection | Neonates                                                                                                | Neonatal ward                                | All-cause mortality               | Compare the clinical characteristics & laboratory data of preterm babies with EC BSI: survival vs. nonsurvival groups, ESBL vs non-ESBL groups, determine the predictive factors of EC BSI in preterm babies | EC               |
| Islas-Munoz B <sup>72</sup>       | 2016-2017 | Mexico   | Cohort study, prospective   | Non-ESBL-infection | Cancer patients                                                                                         | Oncological ward                             | All-cause mortality (28 day)      | Evaluate the clinical epidemiological characteristics & risk factors associated with mortality in cancer patients with BSI-special emphasis on MDR bacteria                                                  | GNB (and others) |
| Ma J <sup>73</sup>                | 2012-2015 |          | Cohort study, retrospective | Non-ESBL-infection | Patients with hematological diseases                                                                    | Entire hospital                              | All-cause mortality (28 day)      | Evaluate the antimicrobial resistance & clinical features & risk factors for septic shock & death of nosocomial EC-BSI                                                                                       | EC               |
| Man MY <sup>74</sup>              | 2009-2016 | China    | Cohort study, retrospective | Non-ESBL-infection | All kinds of patients, except patients from Burn unit, transplant surgery ward or with thoracic therapy | Entire hospital                              | All-cause mortality (28 day)      | Evaluate the incidence & clinical characteristics & outcomes of patients with KP BSI in critical care & general ward settings                                                                                | KP               |
| Marando R <sup>75</sup>           | 2016      | Tanzania | Cohort study, prospective   | Non-ESBL-infection | Neonates                                                                                                | NICU                                         | All-cause mortality               | Investigate factors associated with ESBL-PE neonatal sepsis & mortality among neonates, characterise selected isolates to show virulence potential & transmission dynamics                                   | GNB              |
| Namikawa H <sup>76</sup>          | 2011-2015 | Japan    | Cohort study, retrospective | Non-ESBL-infection | All kinds of patients                                                                                   | Entire hospital                              | All-cause mortality               | Investigate clinical characteristics of patients with ESBL-EC-BSI                                                                                                                                            | EC               |
| Shi SH <sup>77</sup>              | 2008-2015 | China    | Cohort study, retrospective | Non-ESBL-infection | Patients with pyogenic liver abscess                                                                    | Centre for hepatopancreaticobiliary diseases | All-cause mortality, LOS          | Aetiology & morbidity & clinical characteristics of pyogenic liver abscess caused by ESBL-PE                                                                                                                 | GN               |
| Tanir Basaranoglu S <sup>78</sup> | 2011-2015 | Turkey   | Cohort study, retrospective | Non-ESBL-infection | Children                                                                                                | Pediatric ward                               | All-cause mortality (28 day)      | Assess risk factors for health care associated ESBL-KP-BSI in children, analyze clinical outcomes: ESBL-KP vs. non-ESBL-KP                                                                                   | KP               |
| Bazazi K <sup>79</sup>            | 2009-2015 | France   | Cohort study, prospective   | Non-ESBL-infection | ICU-patients                                                                                            | ICU                                          | All-cause mortality, LOS, ICU-LOS | Determine, among ESBL-PE carriers, the prevalence & associated factors & clinical impact of ESBL-PE pneumonia, determine factors associated with ICUAP caused by carbapenem-resistant bacteria               | GNB              |

1  
2  
3  
4  
5  
6  
7  
8  
9  
10  
11  
12  
13  
14  
15  
16  
17  
18  
19  
20  
21  
22  
23  
24  
25  
26  
27  
28  
29  
30  
31  
32  
33  
34  
35  
36  
37  
38  
39  
40  
41  
42  
43  
44  
45  
46

|                            | Years     | Country      | Study design                | Control group                                                         | Study population      | Setting              | Outcome definition                                                 | Main objective                                                                                                                                                                                                       | Pathogen |
|----------------------------|-----------|--------------|-----------------------------|-----------------------------------------------------------------------|-----------------------|----------------------|--------------------------------------------------------------------|----------------------------------------------------------------------------------------------------------------------------------------------------------------------------------------------------------------------|----------|
| Ray S <sup>80</sup>        | 2014-2016 | India        | Cohort study, prospective   | Non-ESBL-infection                                                    | ICU-patients          | ICU                  | All-cause mortality                                                | Investigate spectrum of microbial resistance pattern in the community and their effects on mortality                                                                                                                 | GNB      |
| Haruki Y <sup>81</sup>     | 2006-2016 | Japan        | Cohort study, retrospective | Non-ESBL-infection                                                    | ICU-patients          | ICU                  | All-cause mortality                                                | Compare the clinical characteristics & outcomes of critically ill patients in an ICU, who were hospitalised for BSI caused by ESBL-EC or non-ESBL-EC.                                                                | GNB      |
| Lin WT <sup>82</sup>       | 2009-2014 | Taiwan       | Cohort study, retrospective | Non-ESBL-infection                                                    | All kinds of patients | Entire hospital      | All-cause mortality                                                | Investigate the clinical manifestations & bacteriological features of culture-proven, GNB arthritis                                                                                                                  | GNB      |
| Guys H <sup>83</sup>       | 2006-2011 | South Africa | Cohort study, retrospective | Non-ESBL-infection                                                    | Children              | Pediatric ward       | All-cause mortality                                                | Describe the clinical presentation of KPBSI, risk factors associated with ESBL-KPBSI, antibiotic susceptibility patterns of the KP isolates & KPBSI mortality including factors associated with in-patient mortality | KP       |
| Lee CC <sup>84</sup>       | 2008-2013 | Taiwan       | Cohort study, retrospective | Non-ESBL-infection                                                    | All kinds of patients | Emergency Department | Attributable mortality, all-cause mortality (28 day), LOS, ICU-LOS | Analyse the impact of ESBL-producing isolates on the outcome of bacteremic patient after controlling for baseline patient characteristics & bacteraemia severity by using a propensity-matched analysis (PSM)        | GNB      |
| Huang YY <sup>85</sup>     | 2011-2013 | Canada       | Case cohort study           | Non-ESBL-infection                                                    | All kinds of patients | Entire hospital      | All-cause mortality, LOS                                           | Determine cumulative incidence of ESBL urosepsis, identify major risk factors for ESBL urosepsis, determine impact of international travel on development of ESBL urosepsis                                          | EC, KP   |
| Komatsu Y <sup>86</sup>    | 2008-2013 | Japan        | Case cohort study           | Non-ESBL-infection                                                    | All kinds of patients | Entire hospital      | All-cause mortality (14 day)                                       | Identify risk factors & clinical outcomes in patients with BSI due to ESBL- or carbapenemase-producing EC, determine prevalence & genetic background                                                                 | EC       |
| Liu MM <sup>87</sup>       | 2011-2016 | China        | Case cohort study           | Control group: non-ESBL-infection, second control group: no infection | ICU-patients          | ICU                  | All-cause mortality                                                | Identify risk factors for ESBL-producing ECBSI among carriers at ICU                                                                                                                                                 | EC       |
| Nivesvivat T <sup>88</sup> | 2010-2017 | Thailand     | Cohort study, retrospective | Non-ESBL-infection                                                    | Children              | Pediatric ward       | All-cause mortality, LOS                                           | Determine prevalence, risk factors & clinical outcomes of ESBL-producing EB in paediatric BSI                                                                                                                        | EC, KP   |

1  
2  
3  
4  
5  
6  
7  
8  
9  
10  
11  
12  
13  
14  
15  
16  
17  
18  
19  
20  
21  
22  
23  
24  
25  
26  
27  
28  
29  
30  
31  
32  
33  
34  
35  
36  
37  
38  
39  
40  
41  
42  
43  
44  
45  
46

|                          | Years     | Country | Study design                | Control group      | Study population                                                | Setting         | Outcome definition                           | Main objective                                                                                                                                                                                                                                                                                                                                                                            | Pathogen |
|--------------------------|-----------|---------|-----------------------------|--------------------|-----------------------------------------------------------------|-----------------|----------------------------------------------|-------------------------------------------------------------------------------------------------------------------------------------------------------------------------------------------------------------------------------------------------------------------------------------------------------------------------------------------------------------------------------------------|----------|
| Cordery RJ <sup>89</sup> | 2004-2006 | UK      | Cohort study, retrospective | Non-ESBL-infection | ICU-patients                                                    | ICU             | All-cause mortality                          | Elucidate specific risk factors for the acquisition of ESBL infection in the ICU; all-cause mortality (in ICU) compared in patients with infections due to ESBL- and non-ESBL-producing organisms                                                                                                                                                                                         | GNB      |
| Paikos GL <sup>90</sup>  | 2003-2005 | Greece  | Cohort study, prospective   | Non-ESBL-infection | All kinds of patients                                           | Entire hospital | All-cause mortality                          | Identify risk factors associated BSI caused by integron-carrying EB; evaluate the consequences of these genetic elements on patient outcome                                                                                                                                                                                                                                               | GNB      |
| Gudiol C <sup>91</sup>   | 2006-2008 | Spain   | Cohort study, prospective   | Non-ESBL-infection | Cancer patients and hematopoietic stem cell transplant patients | Entire hospital | All-cause mortality                          | Assess clinical features, risk factors, molecular epidemiology & outcome of ESBLEC BSI in hospitalised cancer patients                                                                                                                                                                                                                                                                    | EC       |
| Marchaim D <sup>92</sup> | 2006-2008 | Israel  | Cohort study, prospective   | Non-ESBL-infection | All kinds of patients                                           | Entire hospital | All-cause mortality, LOS                     | Define predictors & outcomes of ESBL BSI among patients with bacteraemia due to EB upon hospital admission                                                                                                                                                                                                                                                                                | GNB      |
| Menashe G <sup>93</sup>  | 1997      | Israel  | Cohort study, retrospective | Non-ESBL-infection | All kinds of patients                                           | Entire hospital | All-cause mortality                          | Determine: prevalence of ESBL-P organisms among adult patients with nosocomial EB BSI treated in our institution; association between ESBL production & resistance to other antibiotics; clinical characteristics of patients with nosocomial ESBL-P BSI compared with those infected with non-producing strains; impact of ESBL production on outcome of patients with nosocomial EB BSI | GNB      |
| Ortega M <sup>94</sup>   | 1991-2007 | Spain   | Cohort study, prospective   | Non-ESBL-infection | All kinds of patients                                           | Entire hospital | All-cause mortality                          | Describe source, resistance rate to fluoroquinolone & beta-lactam antibiotics and mortality of EC BSI episodes in a single institution; identify predictive factors for isolation of fluoroquinolone-resistant or ESBL- producing strains.                                                                                                                                                | EC       |
| Sziglyi M <sup>95</sup>  | 2005-2008 | Hungary | Cohort study, retrospective | Non-ESBL-infection | All kinds of patients                                           | Entire hospital | Attributable mortality, all-cause mortality, | Investigate risk factors for & outcomes of BSI caused by ESBL-producing and ESBL-non-producing KP                                                                                                                                                                                                                                                                                         | KP       |
| Tsai SS <sup>96</sup>    | 2005-2006 | Taiwan  | Cohort study, retrospective | Non-ESBL-infection | Diabetic patients                                               | Entire hospital | All-cause mortality                          | Analyze characteristics, risk factors & outcomes of diabetic patients with community- vs. hospital-acquired KP BSI                                                                                                                                                                                                                                                                        | KP       |



1  
2  
3 EC = *Escherichia coli*  
4 KP = *Klebsiella pneumoniae*  
5 GNB = Gram-negative bacteria  
6 BSI = Bloodstream infection  
7 UTI = Urinary tract infection  
8 ICU = Intensive care unit  
9 NICU = Neonatal intensive care unit  
10 ESBL-PE = Extended-spectrum beta-lactamase-producing Enterobacteriaceae  
11 EB = Enterobacteriaceae  
12 LOS = Length of stay  
13  
14  
15  
16  
17  
18  
19  
20  
21  
22  
23  
24  
25  
26  
27  
28  
29  
30  
31  
32  
33  
34  
35  
36  
37  
38  
39  
40  
41  
42  
43  
44  
45  
46

For peer review only

**Supplementary table S5: Risk of bias assessment of case cohort studies according to Newcastle - Ottawa quality assessment scale:**

| Assessment criteria / Study author | 1. Is the case definition adequate? | 2. Representativeness of the cases: | 3. Selection of Controls | 4. Definition of Controls | 5. Comparability of cases and controls on the basis of the design or analysis | 6. Ascertainment of exposure | 7. Same method of ascertainment for cases and controls | 8. Non-Response rate |
|------------------------------------|-------------------------------------|-------------------------------------|--------------------------|---------------------------|-------------------------------------------------------------------------------|------------------------------|--------------------------------------------------------|----------------------|
| Lautenbach, E.                     | Green                               | Green                               | Yellow                   | Yellow                    | Green                                                                         | Green                        | Green                                                  | Green                |
| Apisarntharak, A.                  | Green                               | Green                               | Yellow                   | Green                     | Green                                                                         | Green                        | Green                                                  | Green                |
| Briongos-Figuero, L-S.             | Green                               | Green                               | Yellow                   | Yellow                    | Grey                                                                          | Green                        | Green                                                  | Green                |
| Stone, P.W.                        | Green                               | Green                               | Brown                    | Yellow                    | Grey                                                                          | Green                        | Green                                                  | Green                |
| Kola, A.                           | Green                               | Green                               | Yellow                   | Yellow                    | Green                                                                         | Green                        | Green                                                  | Green                |
| Tsai, M.H.                         | Green                               | Green                               | Yellow                   | Yellow                    | Yellow                                                                        | Green                        | Green                                                  | Green                |
| Maslikowska, J.A.                  | Green                               | Green                               | Yellow                   | Yellow                    | Green                                                                         | Green                        | Green                                                  | Green                |
| Nguyen, M. L.                      | Green                               | Green                               | Yellow                   | Yellow                    | Yellow                                                                        | Green                        | Green                                                  | Green                |
| Denis, B.                          | Green                               | Green                               | Yellow                   | Green                     | Yellow                                                                        | Green                        | Green                                                  | Green                |
| Chopra, T.                         | Green                               | Green                               | Yellow                   | Yellow                    | Green                                                                         | Green                        | Green                                                  | Green                |
| Skippen, I.                        | Green                               | Green                               | Yellow                   | Yellow                    | Yellow                                                                        | Green                        | Grey                                                   | Green                |
| Apisarntharak, A.                  | Green                               | Green                               | Yellow                   | Yellow                    | Yellow                                                                        | Green                        | Green                                                  | Green                |
| Tumbarello, M.                     | Green                               | Green                               | Yellow                   | Yellow                    | Green                                                                         | Green                        | Green                                                  | Green                |
| Apisarntharak, A.                  | Green                               | Green                               | Yellow                   | Yellow                    | Green                                                                         | Green                        | Green                                                  | Green                |
| Kanafani, Z. A.                    | Green                               | Green                               | Yellow                   | Yellow                    | Green                                                                         | Green                        | Green                                                  | Green                |
| Zaoutis, T. E.                     | Green                               | Green                               | Yellow                   | Yellow                    | Yellow                                                                        | Green                        | Green                                                  | Green                |
| Song, K. H.                        | Green                               | Green                               | Yellow                   | Yellow                    | Green                                                                         | Green                        | Green                                                  | Green                |
| Kang, C. I.                        | Green                               | Green                               | Yellow                   | Yellow                    | Grey                                                                          | Green                        | Green                                                  | Green                |
| Rodriguez-Bano, J.                 | Green                               | Green                               | Yellow                   | Yellow                    | Yellow                                                                        | Green                        | Green                                                  | Green                |
| Lin, J. N.                         | Green                               | Green                               | Yellow                   | Yellow                    | Green                                                                         | Green                        | Green                                                  | Green                |
| Ku, N. S.                          | Green                               | Green                               | Yellow                   | Yellow                    | Green                                                                         | Green                        | Green                                                  | Green                |
| Kang, C. I.                        | Green                               | Green                               | Yellow                   | Yellow                    | Green                                                                         | Green                        | Green                                                  | Green                |
| Huang, Y. Y.                       | Green                               | Green                               | Yellow                   | Yellow                    | Yellow                                                                        | Green                        | Green                                                  | Green                |
| Komatsu, Y.                        | Green                               | Green                               | Yellow                   | Yellow                    | Yellow                                                                        | Green                        | Green                                                  | Green                |
| Liu, M. M.                         | Green                               | Green                               | Yellow                   | Green                     | Yellow                                                                        | Green                        | Green                                                  | Green                |

Risk of bias assessment of cohort studies according to Newcastle - Ottawa quality assessment scale:

| Study author / Assessment criteria | 1. Representativeness of exposed cohort | 2. Selection of non-exposed cohort | 3. Ascertainment of exposure | 4. Demonstration that outcome of interest not present at start | 5. Comparability based on design or analysis | 6. Assessment of outcome | 7. Follow-up long enough for outcome | 8. Adequacy of follow up of cohorts |
|------------------------------------|-----------------------------------------|------------------------------------|------------------------------|----------------------------------------------------------------|----------------------------------------------|--------------------------|--------------------------------------|-------------------------------------|
| Jean, S.S.                         | Yellow                                  | Green                              | Green                        | Green                                                          | Green                                        | Yellow                   | Green                                | Green                               |
| Bhavnani, S. M.                    | Green                                   | Green                              | Green                        | Green                                                          | Yellow                                       | Yellow                   | Green                                | Green                               |
| Blomberg, B.                       | Yellow                                  | Green                              | Green                        | Green                                                          | Grey                                         | Yellow                   | Green                                | Green                               |
| Pena, C.                           | Green                                   | Green                              | Green                        | Green                                                          | Yellow                                       | Yellow                   | Green                                | Green                               |
| Onken, A.                          | Green                                   | Green                              | Green                        | Green                                                          | Grey                                         | Yellow                   | Green                                | Green                               |
| Melzer, M.                         | Green                                   | Green                              | Green                        | Green                                                          | Grey                                         | Yellow                   | Green                                | Green                               |
| Bennet, J.                         | Green                                   | Green                              | Green                        | Green                                                          | Yellow                                       | Yellow                   | Green                                | Green                               |
| Wu, Y.                             | Yellow                                  | Green                              | Green                        | Green                                                          | Yellow                                       | Yellow                   | Green                                | Green                               |
| Abhilash, K.                       | Green                                   | Green                              | Green                        | Green                                                          | Green                                        | Yellow                   | Yellow                               | Green                               |
| Artero, A.                         | Yellow                                  | Green                              | Green                        | Green                                                          | Yellow                                       | Yellow                   | Green                                | Green                               |
| Islas-Munos, B.                    | Green                                   | Green                              | Green                        | Green                                                          | Yellow                                       | Yellow                   | Green                                | Green                               |
| Marando, R.                        | Green                                   | Green                              | Green                        | Green                                                          | Yellow                                       | Yellow                   | Green                                | Green                               |
| Razazi, K.                         | Green                                   | Green                              | Green                        | Green                                                          | Green                                        | Yellow                   | Green                                | Green                               |
| Ray, S.                            | Green                                   | Green                              | Green                        | Green                                                          | Yellow                                       | Yellow                   | Green                                | Green                               |
| Panhotra, B.                       | Green                                   | Green                              | Green                        | Green                                                          | Yellow                                       | Yellow                   | Green                                | Green                               |
| Kim, S.                            | Green                                   | Green                              | Green                        | Green                                                          | Yellow                                       | Yellow                   | Green                                | Green                               |
| Chayakulkeeree, M.                 | Green                                   | Green                              | Green                        | Green                                                          | Yellow                                       | Yellow                   | Green                                | Green                               |
| Apisarnthanarak, A.                | Yellow                                  | Green                              | Green                        | Green                                                          | Yellow                                       | Yellow                   | Green                                | Green                               |
| Ha, Y.                             | Yellow                                  | Green                              | Green                        | Green                                                          | Yellow                                       | Yellow                   | Green                                | Green                               |
| Du, B                              | Green                                   | Green                              | Green                        | Green                                                          | Yellow                                       | Yellow                   | Green                                | Green                               |
| Pillay, T.                         | Yellow                                  | Green                              | Green                        | Green                                                          | Grey                                         | Yellow                   | Green                                | Green                               |
| Kim, B.                            | Green                                   | Green                              | Green                        | Green                                                          | Yellow                                       | Yellow                   | Green                                | Green                               |
| Kim, Y                             | Green                                   | Green                              | Green                        | Green                                                          | Yellow                                       | Yellow                   | Green                                | Green                               |
| Marra, A.                          | Green                                   | Green                              | Green                        | Green                                                          | Yellow                                       | Yellow                   | Green                                | Green                               |
| Schwaber, M.                       | Yellow                                  | Green                              | Green                        | Green                                                          | Yellow                                       | Yellow                   | Green                                | Green                               |
| Leistner, R.                       | Green                                   | Green                              | Green                        | Green                                                          | Yellow                                       | Yellow                   | Green                                | Green                               |
| Loh, L.C.                          | Green                                   | Green                              | Green                        | Green                                                          | Green                                        | Yellow                   | Green                                | Red                                 |
| Trecarichi, E.                     | Yellow                                  | Green                              | Green                        | Green                                                          | Yellow                                       | Yellow                   | Green                                | Green                               |
| Tuon, F.                           | Green                                   | Green                              | Green                        | Green                                                          | Yellow                                       | Yellow                   | Green                                | Green                               |
| Kang, C. I.                        | Yellow                                  | Green                              | Green                        | Green                                                          | Yellow                                       | Yellow                   | Green                                | Green                               |
| Pena, C.                           | Green                                   | Green                              | Green                        | Green                                                          | Grey                                         | Yellow                   | Green                                | Green                               |
| Tumbarello, M.                     | Yellow                                  | Green                              | Green                        | Green                                                          | Yellow                                       | Yellow                   | Green                                | Green                               |
| Gurntke, S.                        | Green                                   | Green                              | Green                        | Green                                                          | Yellow                                       | Yellow                   | Green                                | Green                               |
| Oh, M.                             | Yellow                                  | Green                              | Green                        | Green                                                          | Yellow                                       | Yellow                   | Green                                | Green                               |
| Leistner, R.                       | Green                                   | Green                              | Green                        | Green                                                          | Grey                                         | Yellow                   | Green                                | Green                               |
| Anunnatsiri                        | Yellow                                  | Green                              | Green                        | Green                                                          | Yellow                                       | Yellow                   | Green                                | Green                               |

|    |                       |        |       |       |       |        |        |       |       |
|----|-----------------------|--------|-------|-------|-------|--------|--------|-------|-------|
| 1  | Raviv, Y.             | Yellow | Green | Green | Green | Yellow | Yellow | Green | Green |
| 2  | Kim, H.J.             | Yellow | Green | Green | Green | Green  | Yellow | Green | Green |
| 3  | MacVane, S.           | Yellow | Green | Green | Green | Green  | Yellow | Green | Green |
| 4  | Shanthi               | Yellow | Green | Green | Green | Yellow | Yellow | Green | Green |
| 5  | Han, S.B.             | Yellow | Green | Green | Green | Green  | Yellow | Green | Green |
| 6  | Lee, S.               | Green  | Green | Green | Green | Yellow | Yellow | Green | Green |
| 7  | Chen, I-L.            | Green  | Green | Green | Green | Yellow | Yellow | Green | Green |
| 8  | Ma, J.                | Green  | Green | Green | Green | Green  | Yellow | Green | Green |
| 9  | Man, M.               | Yellow | Green | Green | Green | Yellow | Yellow | Green | Green |
| 10 | Namikawa, H.          | Yellow | Green | Green | Green | Yellow | Yellow | Green | Green |
| 11 | Shi, S.               | Yellow | Green | Green | Green | Grey   | Yellow | Green | Green |
| 12 | Tanir Basarangolu, S. | Yellow | Green | Green | Green | Yellow | Yellow | Green | Green |
| 13 | Haruki, Y.            | Yellow | Green | Green | Green | Green  | Yellow | Green | Green |
| 14 | Lin, W.               | Green  | Green | Green | Green | Grey   | Yellow | Green | Green |
| 15 | Buys, H.              | Green  | Green | Green | Green | Green  | Yellow | Green | Green |
| 16 | Lee, C.C.             | Yellow | Green | Green | Green | Green  | Yellow | Green | Green |
| 17 | Nivesvivat, T.        | Yellow | Green | Green | Green | Green  | Yellow | Green | Green |
| 18 |                       |        |       |       |       |        |        |       |       |
| 19 |                       |        |       |       |       |        |        |       |       |
| 20 |                       |        |       |       |       |        |        |       |       |
| 21 |                       |        |       |       |       |        |        |       |       |
| 22 |                       |        |       |       |       |        |        |       |       |
| 23 |                       |        |       |       |       |        |        |       |       |
| 24 |                       |        |       |       |       |        |        |       |       |
| 25 |                       |        |       |       |       |        |        |       |       |
| 26 |                       |        |       |       |       |        |        |       |       |
| 27 |                       |        |       |       |       |        |        |       |       |
| 28 |                       |        |       |       |       |        |        |       |       |
| 29 |                       |        |       |       |       |        |        |       |       |
| 30 |                       |        |       |       |       |        |        |       |       |
| 31 |                       |        |       |       |       |        |        |       |       |
| 32 |                       |        |       |       |       |        |        |       |       |
| 33 |                       |        |       |       |       |        |        |       |       |
| 34 |                       |        |       |       |       |        |        |       |       |
| 35 |                       |        |       |       |       |        |        |       |       |
| 36 |                       |        |       |       |       |        |        |       |       |
| 37 |                       |        |       |       |       |        |        |       |       |
| 38 |                       |        |       |       |       |        |        |       |       |
| 39 |                       |        |       |       |       |        |        |       |       |
| 40 |                       |        |       |       |       |        |        |       |       |
| 41 |                       |        |       |       |       |        |        |       |       |
| 42 |                       |        |       |       |       |        |        |       |       |
| 43 |                       |        |       |       |       |        |        |       |       |
| 44 |                       |        |       |       |       |        |        |       |       |
| 45 |                       |        |       |       |       |        |        |       |       |
| 46 |                       |        |       |       |       |        |        |       |       |
| 47 |                       |        |       |       |       |        |        |       |       |
| 48 |                       |        |       |       |       |        |        |       |       |
| 49 |                       |        |       |       |       |        |        |       |       |
| 50 |                       |        |       |       |       |        |        |       |       |
| 51 |                       |        |       |       |       |        |        |       |       |
| 52 |                       |        |       |       |       |        |        |       |       |
| 53 |                       |        |       |       |       |        |        |       |       |
| 54 |                       |        |       |       |       |        |        |       |       |
| 55 |                       |        |       |       |       |        |        |       |       |
| 56 |                       |        |       |       |       |        |        |       |       |
| 57 |                       |        |       |       |       |        |        |       |       |
| 58 |                       |        |       |       |       |        |        |       |       |
| 59 |                       |        |       |       |       |        |        |       |       |
| 60 |                       |        |       |       |       |        |        |       |       |

For peer review only

**Supplementary table S6: Source of heterogeneity among effect estimates in studies on ESBL bloodstream infections in comparison with patients with non-ESBL bloodstream infections assessed using univariate meta-regression:**

| Subgroups / Outcome                  | All-cause mortality | Length of Stay |
|--------------------------------------|---------------------|----------------|
| Mortality time                       | 0.85                | -              |
| Pathogen                             | 0.45                | 0.34           |
| Study design                         | 0.51                | 0.21           |
| Study country                        | 0.22                | 0.09           |
| Income classification                | 0.17                | 0.80           |
| Study period                         | 0.57                | 0.78           |
| Study setting: ICU ward              | 0.78                | 0.97           |
| Study setting: Neonatal ward         | 0.62                | 0.97           |
| Study setting: Pediatric ward        | 0.96                | 0.96           |
| Study population: ICU patients       | 1.00                | -              |
| Study population: Children           | 0.96                | 0.96           |
| Study population: Neonates           | 0.62                | 0.97           |
| Information about therapy            | 0.53                |                |
| Appropriateness of therapy reported  | 0.68                |                |
| Information about outcome of therapy | 0.74                | -              |
| MIC reported                         | 0.28                | -              |

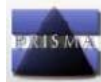

# PRISMA 2009 Checklist

| Section/topic                      | #  | Checklist item                                                                                                                                                                                                                                                                                              | Reported on page # |
|------------------------------------|----|-------------------------------------------------------------------------------------------------------------------------------------------------------------------------------------------------------------------------------------------------------------------------------------------------------------|--------------------|
| <b>TITLE</b>                       |    |                                                                                                                                                                                                                                                                                                             |                    |
| Title                              | 1  | Identify the report as a systematic review, meta-analysis, or both.                                                                                                                                                                                                                                         | 1                  |
| <b>ABSTRACT</b>                    |    |                                                                                                                                                                                                                                                                                                             |                    |
| Structured summary                 | 2  | Provide a structured summary including, as applicable: background; objectives; data sources; study eligibility criteria, participants, and interventions; study appraisal and synthesis methods; results; limitations; conclusions and implications of key findings; systematic review registration number. | 2                  |
| <b>INTRODUCTION</b>                |    |                                                                                                                                                                                                                                                                                                             |                    |
| Rationale                          | 3  | Describe the rationale for the review in the context of what is already known.                                                                                                                                                                                                                              | 4                  |
| Objectives                         | 4  | Provide an explicit statement of questions being addressed with reference to participants, interventions, comparisons, outcomes, and study design (PICOS).                                                                                                                                                  | 4                  |
| <b>METHODS</b>                     |    |                                                                                                                                                                                                                                                                                                             |                    |
| Protocol and registration          | 5  | Indicate if a review protocol exists, if and where it can be accessed (e.g., Web address), and, if available, provide registration information including registration number.                                                                                                                               | 6                  |
| Eligibility criteria               | 6  | Specify study characteristics (e.g., PICOS, length of follow-up) and report characteristics (e.g., years considered, language, publication status) used as criteria for eligibility, giving rationale.                                                                                                      | 5                  |
| Information sources                | 7  | Describe all information sources (e.g., databases with dates of coverage, contact with study authors to identify additional studies) in the search and date last searched.                                                                                                                                  | 4                  |
| Search                             | 8  | Present full electronic search strategy for at least one database, including any limits used, such that it could be repeated.                                                                                                                                                                               | 4                  |
| Study selection                    | 9  | State the process for selecting studies (i.e., screening, eligibility, included in systematic review, and, if applicable, included in the meta-analysis).                                                                                                                                                   | 5                  |
| Data collection process            | 10 | Describe method of data extraction from reports (e.g., piloted forms, independently, in duplicate) and any processes for obtaining and confirming data from investigators.                                                                                                                                  | 5                  |
| Data items                         | 11 | List and define all variables for which data were sought (e.g., PICOS, funding sources) and any assumptions and simplifications made.                                                                                                                                                                       | 5                  |
| Risk of bias in individual studies | 12 | Describe methods used for assessing risk of bias of individual studies (including specification of whether this was done at the study or outcome level), and how this information is to be used in any data synthesis.                                                                                      | 6                  |
| Summary measures                   | 13 | State the principal summary measures (e.g., risk ratio, difference in means).                                                                                                                                                                                                                               | 5                  |
| Synthesis of results               | 14 | Describe the methods of handling data and combining results of studies, if done, including measures of consistency (e.g., I <sup>2</sup> ) for each meta-analysis.                                                                                                                                          | 5,6                |

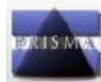

# PRISMA 2009 Checklist

Page 1 of 2

| Section/topic                 | #  | Checklist item                                                                                                                                                                                           | Reported on page #    |
|-------------------------------|----|----------------------------------------------------------------------------------------------------------------------------------------------------------------------------------------------------------|-----------------------|
| Risk of bias across studies   | 15 | Specify any assessment of risk of bias that may affect the cumulative evidence (e.g., publication bias, selective reporting within studies).                                                             | 6                     |
| Additional analyses           | 16 | Describe methods of additional analyses (e.g., sensitivity or subgroup analyses, meta-regression), if done, indicating which were pre-specified.                                                         | 6                     |
| <b>RESULTS</b>                |    |                                                                                                                                                                                                          |                       |
| Study selection               | 17 | Give numbers of studies screened, assessed for eligibility, and included in the review, with reasons for exclusions at each stage, ideally with a flow diagram.                                          | 6                     |
| Study characteristics         | 18 | For each study, present characteristics for which data were extracted (e.g., study size, PICOS, follow-up period) and provide the citations.                                                             | suppl.material        |
| Risk of bias within studies   | 19 | Present data on risk of bias of each study and, if available, any outcome level assessment (see item 12).                                                                                                | 8 and suppl. material |
| Results of individual studies | 20 | For all outcomes considered (benefits or harms), present, for each study: (a) simple summary data for each intervention group (b) effect estimates and confidence intervals, ideally with a forest plot. | suppl.material        |
| Synthesis of results          | 21 | Present results of each meta-analysis done, including confidence intervals and measures of consistency.                                                                                                  | 6-8                   |
| Risk of bias across studies   | 22 | Present results of any assessment of risk of bias across studies (see Item 15).                                                                                                                          | 8 and suppl. material |
| Additional analysis           | 23 | Give results of additional analyses, if done (e.g., sensitivity or subgroup analyses, meta-regression [see Item 16]).                                                                                    | 7,8                   |
| <b>DISCUSSION</b>             |    |                                                                                                                                                                                                          |                       |
| Summary of evidence           | 24 | Summarize the main findings including the strength of evidence for each main outcome; consider their relevance to key groups (e.g., healthcare providers, users, and policy makers).                     | 9                     |
| Limitations                   | 25 | Discuss limitations at study and outcome level (e.g., risk of bias), and at review-level (e.g., incomplete retrieval of identified research, reporting bias).                                            | 10                    |
| Conclusions                   | 26 | Provide a general interpretation of the results in the context of other evidence, and implications for future research.                                                                                  | 11                    |
| <b>FUNDING</b>                |    |                                                                                                                                                                                                          |                       |
| Funding                       | 27 | Describe sources of funding for the systematic review and other support (e.g., supply of data); role of funders for the systematic review.                                                               | 11                    |

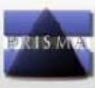

# PRISMA 2009 Checklist

- 1
- 2
- 3
- 4
- 5
- 6
- 7
- 8
- 9
- 10
- 11
- 12
- 13
- 14
- 15
- 16
- 17
- 18
- 19
- 20
- 21
- 22
- 23
- 24
- 25
- 26
- 27
- 28
- 29
- 30
- 31
- 32
- 33
- 34
- 35
- 36
- 37
- 38
- 39
- 40
- 41
- 42
- 43
- 44
- 45
- 46
- 47

For more information, visit: [www.prisma-statement.org](http://www.prisma-statement.org).

Page 2 of 2

For peer review only



# BMJ Open

## Variation of effect estimates in the analysis of mortality and length of hospital stay in patients with infections caused by bacteria producing extended-spectrum beta-lactamases: a systematic review and meta-analysis

|                                 |                                                                                                                                                                                                                                                                                                                                                                                                                                                                                                                                                                                                                                                                                                                                                                                                                                                                                                                                                                                                                                                                                                                                            |
|---------------------------------|--------------------------------------------------------------------------------------------------------------------------------------------------------------------------------------------------------------------------------------------------------------------------------------------------------------------------------------------------------------------------------------------------------------------------------------------------------------------------------------------------------------------------------------------------------------------------------------------------------------------------------------------------------------------------------------------------------------------------------------------------------------------------------------------------------------------------------------------------------------------------------------------------------------------------------------------------------------------------------------------------------------------------------------------------------------------------------------------------------------------------------------------|
| Journal:                        | <i>BMJ Open</i>                                                                                                                                                                                                                                                                                                                                                                                                                                                                                                                                                                                                                                                                                                                                                                                                                                                                                                                                                                                                                                                                                                                            |
| Manuscript ID                   | bmjopen-2019-030266.R3                                                                                                                                                                                                                                                                                                                                                                                                                                                                                                                                                                                                                                                                                                                                                                                                                                                                                                                                                                                                                                                                                                                     |
| Article Type:                   | Original research                                                                                                                                                                                                                                                                                                                                                                                                                                                                                                                                                                                                                                                                                                                                                                                                                                                                                                                                                                                                                                                                                                                          |
| Date Submitted by the Author:   | 10-Dec-2019                                                                                                                                                                                                                                                                                                                                                                                                                                                                                                                                                                                                                                                                                                                                                                                                                                                                                                                                                                                                                                                                                                                                |
| Complete List of Authors:       | Shamsrizi, Parichehr; University Hospital Tubingen Department of Internal Medicine I Gastroenterology Hepatology and Infectious Diseases, Division of Infectious Disease<br>Gladstone, Beryl Primrose ; University Hospital Tubingen Department of Internal Medicine I Gastroenterology Hepatology and Infectious Diseases, Division of Infectious Disease<br>Carrara, Elena; Integrated University Hospital of Verona, Division of Infectious Disease, Department of Diagnostic and Public Health<br>Luise, Dora; Integrated University Hospital of Verona, Division of Infectious Disease, Department of Diagnostic and Public Health<br>Cona, Andrea; ASST Santi Paolo e Carlo, Clinic of Infectious and Tropical Diseases, Department of Health Sciences<br>Bovo, Chiara; Integrated University Hospital of Verona, Medical Direction<br>Tacconelli, Evelina; University Hospital Tubingen Department of Internal Medicine I Gastroenterology Hepatology and Infectious Diseases, Division of Infectious Disease; Integrated University Hospital of Verona, Division of Infectious Disease, Department of Diagnostic and Public Health |
| <b>Primary Subject Heading</b>: | Infectious diseases                                                                                                                                                                                                                                                                                                                                                                                                                                                                                                                                                                                                                                                                                                                                                                                                                                                                                                                                                                                                                                                                                                                        |
| Secondary Subject Heading:      | Infectious diseases, Epidemiology                                                                                                                                                                                                                                                                                                                                                                                                                                                                                                                                                                                                                                                                                                                                                                                                                                                                                                                                                                                                                                                                                                          |
| Keywords:                       | Extended-spectrum beta-lactamase, mortality, bloodstream infection, length of stay, meta-analysis, systematic review                                                                                                                                                                                                                                                                                                                                                                                                                                                                                                                                                                                                                                                                                                                                                                                                                                                                                                                                                                                                                       |
|                                 |                                                                                                                                                                                                                                                                                                                                                                                                                                                                                                                                                                                                                                                                                                                                                                                                                                                                                                                                                                                                                                                                                                                                            |

SCHOLARONE™  
Manuscripts

1  
2  
3 1 **Variation of effect estimates in the analysis of mortality and length of hospital stay in**  
4 **patients with infections caused by bacteria producing extended-spectrum beta-**  
5 **lactamases: a systematic review and meta-analysis**  
6  
7  
8  
9

10 5 **AUTHORS:**

11 6 Parichehr Shamsrizi<sup>1</sup>, Beryl Primrose Gladstone<sup>1</sup>, Elena Carrara<sup>2</sup>, Dora Luise<sup>2</sup>, Andrea Cona<sup>3</sup>,  
12 7 Chiara Bovo<sup>4</sup>, Evelina Tacconelli<sup>1,2</sup>  
13  
14  
15  
16

17 9 **AFFILIATIONS:**

- 18  
19 10 1) Division of Infectious Disease, Department of Internal Medicine I, DZIF Partner site,  
20 11 Tübingen University Hospital, Tübingen, Germany  
21  
22 12 2) Division of Infectious Disease, Department of Diagnostic and Public Health, University  
23 13 Hospital of Verona, Verona, Italy  
24  
25 14 3) Clinic of Infectious and Tropical Diseases, Department of Health Sciences, ASST Santi  
26 15 Paolo e Carlo, University of Milan, Milan, Italy.  
27  
28 16 4) Medical Direction, University Hospital of Verona, Verona, Italy  
29  
30  
31  
32

33 18 **CORRESPONDING AUTHOR:** Elena Carrara, MD

34 19 **Address:** Division of Infectious Disease, Department of Diagnostic and Public Health,  
35 20 University Hospital of Verona, Verona, Italy  
36  
37 21 Piazzale L.A. Scuro 10, Dipartimento di Malattie Infettive, Policlinico Borgo Roma, 37100  
38 22 Verona, Italy.  
39

40 23 **Phone number:** +39 3339566252

41 24 **Email:** elena.carrara@univr.it  
42  
43  
44  
45

46 26 **WORD COUNT:** 2921  
47  
48  
49  
50  
51  
52  
53  
54  
55  
56  
57  
58  
59  
60

## 1 **ABSTRACT**

2 **Objective** To assess the variation of effect estimates in the analysis of mortality and length of  
3 stay (LOS) in patients with infections caused by extended-spectrum beta-lactamase (ESBL)-  
4 producing *Enterobacteriaceae*.

5 **Design** Systematic review and meta-analysis

6 **Methods** Literature search for clinical studies from 1 January 1960 to 1 October 2018 was  
7 conducted in PubMed. Primary outcomes were risk ratios (RRs) of all-cause and attributable  
8 mortality and weighted mean differences (WMDs) in LOS in patients with bloodstream  
9 infections (BSIs) and non-invasive infections. Any change in the effect estimates was  
10 assessed by grouping studies according to design, setting, economy-based country  
11 classification, reporting period, microbiological aetiology, infection type, and adjustment for  
12 appropriateness of empirical treatment. The impact of ESBL production was calculated using  
13 random effect meta-analysis and heterogeneity was evaluated by  $I^2$  statistics and  
14 metaregression.

15 **Results** Eighty-four studies including 22,030 patients and 149 outcome measures were  
16 included in the meta-analysis. Most studies were retrospective cohorts from high-income  
17 countries, providing unadjusted estimates. ESBL production in patients with BSIs (56 studies)  
18 increased the RR for all-cause mortality by a factor of 1.70 (95% CI: 1.52-1.90;  $p < 0.001$ ),  
19 attributable mortality (16 studies) by 1.75 (95% CI: 1.448-2.108;  $p < 0.001$ ), and WMD in the  
20 intensive care unit by 3.07 days (95% CI: 1.61-4.54;  $p < 0.001$ ). WMD in hospital LOS was  
21 significantly higher in BSIs (4.41 days; 95% CI: 3.37-5.46;  $p < 0.001$ ) and non-invasive (2.19  
22 days; 95% CI: 1.56-2.81;  $p < 0.001$ ). Subgroup analyses showed variation of estimates by  
23 study design, population, strain, and assessment of appropriateness of empiric treatment. High  
24 heterogeneity was observed in all analyses.

25 **Conclusions** Current evidence of the clinical burden of infections caused by ESBL-producing  
26 bacteria is highly heterogeneous and based mainly on unadjusted estimates derived from  
27 retrospective studies. Despite these limitations, ESBL production in strains causing BSIs  
28 seems associated with higher all-cause and attributable mortality and longer hospitalisation.

## 29 **KEYWORDS**

30 Extended-spectrum beta-lactamase, mortality, bloodstream infection, length of stay, meta-  
31 analysis, systematic review  
32

## 1 **STRENGTHS AND LIMITATIONS OF THIS STUDY**

- 2 ▶ Evidence of the impact of ESBL production on mortality and length of stay in strains
- 3 causing bacteremic and non-bacteremic infections was collected systematically.
- 4 ▶ Effect of multiple epidemiological and clinical variables was assessed in the calculation of
- 5 estimates.
- 6 ▶ Heterogeneity among studies was assessed.
- 7 ▶ Only few studies had been performed in high-risk populations or low-income countries.

For peer review only

## 1 INTRODUCTION

2 Infections caused by extended-spectrum beta-lactamase (ESBL)-producing  
3 *Enterobacteriaceae* are responsible for high morbidity and mortality worldwide.<sup>1,2,3</sup> The 2018  
4 World Health Organization list of antibiotic-resistant pathogens identified mortality as the  
5 most important criteria to prioritise bacteria for research and development of new, effective  
6 antibiotics.<sup>1</sup> In this prioritisation exercise, ESBL-producing *Enterobacteriaceae* were  
7 designated a critical priority because of their high all-cause mortality and high prevalence  
8 globally in healthcare-associated and community-acquired infections. The incidence and  
9 attributable mortality of multidrug-resistant bacterial infections, including ESBL-producing  
10 *Enterobacteriaceae*, in European countries has been recently estimated using a modelling  
11 analysis.<sup>4</sup> In 2015 ESBL-producing *Escherichia coli* was responsible for almost 300,000  
12 infections in Europe and 9,000 attributable deaths, and ESBL-producing *Klebsiella*  
13 *pneumoniae* caused around 70,000 infections and more than 3,500 deaths. The major  
14 limitation of this analysis is the sparseness of evidence on mortality due to ESBL-producing  
15 bacteria, which was limited largely to studies conducted in high-income countries.

16 Two systematic reviews have been performed to define the impact of ESBL production on  
17 mortality due to *Enterobacteriaceae*.<sup>2,3</sup> Both meta-analyses included studies targeting  
18 bloodstream infections (BSIs) and showed doubling all-cause mortality for ESBL-associated  
19 bacteraemia compared to non-ESBL *Enterobacteriaceae* bacteraemia. A major drawback of  
20 the analyses, highlighted by the authors, was the lack of control for confounding and limited  
21 adjustment for empiric therapy. No systematic review has been performed to assess  
22 attributable mortality and other indicators of clinical impact such as length of stay (LOS).

23 Because estimates of clinical burden drive policy design for antibiotic stewardship and  
24 infection control interventions, precise and current estimates are essential. The objective of  
25 this systematic review and meta-analysis was to assess the variation of effect estimates in the  
26 analysis of mortality and LOS in patients with infections due to ESBL-producing  
27 *Enterobacteriaceae*.

## 28 METHODS

### 29 Literature search strategy

30 The search was performed by 2 researchers (BPG and PS) in PubMed on 05 October 2018  
31 using search terms (supplementary table S1) relevant to the following combinations: (ESBL  
32 AND *Escherichia coli* AND mortality) OR (ESBL AND *Klebsiella pneumoniae* AND  
33

1 mortality) OR (ESBL AND Escherichia coli AND length of stay OR length of hospitalisation)  
2 OR (ESBL AND Klebsiella pneumoniae AND length of stay OR length of hospitalisation).  
3 Reference lists of retrieved articles were also searched.

#### 4 **Eligibility criteria**

5 We included all clinical studies with a comparison group assessing all-cause mortality,  
6 attributable mortality, and overall LOS and intensive care unit stay (ICU) LOS in hospitalised  
7 patients with ESBL infections. Studies published from 1 January 1960 to 1 October 2018  
8 irrespective of the clinical setting and study design were included. No language restriction has  
9 been applied. Diagnostic studies, reviews, case reports, non-clinical studies, and abstracts of  
10 conference presentations were not included.

#### 11 **Data extraction**

12 Two reviewers (PS and BPG) independently assessed the eligibility of trials and extracted  
13 data. In case of disagreement, a third reviewer (DL) was consulted. Extracted data were  
14 collected in an electronic worksheet, using EpiInfo 7.1: authors, journal, country, year of  
15 publication, year of study, time of data collection, study design, comparison group, study  
16 setting, population, aetiology, type and site of infection, and raw data related to mortality and  
17 LOS/ICU-LOS. Countries were classified as high-, middle-, or low-income using the World  
18 Bank Atlas method.<sup>5</sup> Adjusted effect estimates such as odds ratios (ORs) or hazard ratios and  
19 quality indicators such as reporting of antibiotic therapy, appropriateness of empirical  
20 treatment, resistance mechanisms, and minimum inhibitory concentrations (MICs) were also  
21 extracted.

22 Mortality data were extracted as all-cause mortality or attributable mortality as defined in the  
23 studies. Where available, prespecified time periods for mortality assessment (i.e., 14 days, 28  
24 days, in-hospital) were also extracted. LOS and ICU-LOS were extracted as days with mean  
25 and standard deviation or median and interquartile range.

#### 26 **Data analysis**

27 The primary outcomes for the clinical impact of ESBL infections were RRs of all-cause and  
28 attributable mortality and the weighted mean difference (WMD) in LOS and ICU-LOS in  
29 patients with ESBL infections compared with those in patients with non-ESBL infections and,  
30 where available, with uninfected patients. The impact of ESBL production on attributable and  
31 all-cause mortality was calculated with random effect meta-analysis and expressed as RR with

1  
2  
3 1 95% confidence interval (CI). WMD in days with 95% CI was calculated to express the  
4 2 excess in LOS and ICU-LOS.

5  
6  
7 3 Variation of the effect estimate was assessed by grouping the studies according to the  
8 4 following study/outcome characteristics: mortality time assessment (7 vs 14 days), aetiology  
9 5 (*E. coli* vs *K. pneumoniae*), infection localisation, clinical setting (paediatric, oncology, ICU),  
10 6 economic country areas (high-income countries [HICs] vs low- and medium-income countries  
11 7 [LMICs]), study design, assessment of empiric therapy, and year. Studies were classified  
12 8 according to the type of infections evaluated. Studies on BSIs were defined as those in which  
13 9 patients had positive blood cultures and were admitted to the hospitals with signs and  
14 10 symptoms of systemic inflammatory response and requiring therapy, similarly to the  
15 11 definition adopted by the most recent cohort studies on ESBL infections.<sup>6</sup> Non-invasive  
16 12 infections included non-bacteremic patients with only localised signs and symptoms of  
17 13 infection (such as urinary tract infections or superficial surgical site infections).

18  
19 14 Subgroup analysis was computed only if more than 2 studies were available for each group.  
20 15 Heterogeneity was evaluated by using  $I^2$  statistics and metaregression. Overall significance  
21 16 testing was carried out using Wald tests adjusted using the Bonferroni correction. The  
22 17 unadjusted ORs were compared with the adjusted ORs to estimate the effect of adjustment.  
23 18 Reporting and publication bias was presented in funnel plots (supplementary figure 1 and 2)  
24 19 and tested by Egger's test. Statistical analyses were performed using Stata version 15. Risk of  
25 20 bias was assessed independently by two authors (PS, DL) using the Newcastle - Ottawa  
26 21 quality assessment scale for cohort studies.<sup>7</sup> Studies were classified as low, moderate, or  
27 22 high quality according to AHRQ standards (supplementary table S2). All meta-analyses  
28 23 were performed in accordance with the Cochrane Collaboration recommendations<sup>8</sup> and  
29 24 reported according to the PRISMA statement.<sup>9</sup>

30 25 The protocol is available online.  
31 26 ([https://im1-tuebingen.de/wp-](https://im1-tuebingen.de/wp-content/uploads/2019/03/ClinicalImpactAMR_SR_studyprotocol_2018.pdf)  
32 27 [content/uploads/2019/03/ClinicalImpactAMR\\_SR\\_studyprotocol\\_2018.pdf](https://im1-tuebingen.de/wp-content/uploads/2019/03/ClinicalImpactAMR_SR_studyprotocol_2018.pdf))

## 33 28 **Patient and Public Involvement**

34 29 There was no patient or public involvement in this systematic review of published literature.

## 35 30 **RESULTS**

36 31 Our literature search identified 1006 studies, and 92 (9.2%) met the eligibility criteria on the  
37 32 basis of abstract screening. Full-text screening excluded an additional 5 articles, providing an

1 evidence base of 87 studies (Figure 1).<sup>10-96</sup> The 87 studies included in the qualitative analysis  
2 were conducted between 1991 and 2017 in 25 countries, mainly in South Korea (14 studies),  
3 Thailand (7), USA (7), Taiwan (7), and Spain (7). Sixty (68.9%) studies were performed in  
4 HICs, 26 (29.9%) in LMICs, and 1 included both HICs and LMICs.<sup>56</sup> About half (44, 50.6%)  
5 were retrospective cohort studies, 24 (27.6%) case cohort studies, and 18 (20.7%) prospective  
6 cohort studies; 1 study had an interventional design.<sup>57</sup> The comparison group was patients  
7 with infections caused by gram-negative non-ESBL producers in 82 (94.3%) studies, non-  
8 infected patients in 2 (2.3%), and both control groups in 3 (3.5%). Most (57, 65.5%) studies  
9 included data from the entire hospital, while a few focused on specific settings, mainly ICUs  
10 (9, 10.3%) and paediatric wards (8, 9.2%). The most common ESBL-producing bacteria were  
11 *E. coli* (23, 26.4%) and *K. pneumoniae* (17, 19.5%). An overview of study characteristics is  
12 provided in online supplementary table S3.

13 Because data in 3 studies<sup>22,61,87</sup> were insufficient for quantitative analysis, 84 (96.6%) studies  
14 were included in the meta-analysis analysing data from 22,030 patients and 149 outcome  
15 measures. Fifty-seven studies analysed BSIs and 10 non-invasive infections. Study  
16 characteristics for all studies are provided in online supplementary table S4. 49 (58.3%)  
17 studies were of high quality, 23 (27.3%) were of moderate quality, and 12 (14.3%) were of  
18 low quality (supplementary table S5).

### 19 **All-cause mortality**

20 All-cause mortality was reported in 81 studies including 21,942 patients (56 on BSIs and 7 on  
21 non-invasive infections). ESBL production in patients with BSIs increased all-cause mortality  
22 by a factor of 1.70 (95% CI: 1.52-1.90;  $p < 0.001$ ;  $I^2 = 45.3%$ ;  $p < 0.001$ ) while studies including  
23 non-invasive reported a RR of 1.58 (95% CI: 1.23-2.02;  $p < 0.001$ ) (supplementary figure 3).  
24 Among the BSI patients, the RR increased over time from 1.56 (95% CI: 1.15-2.11;  $p = 0.004$ )  
25 in 1991-1999 to 1.74 (95% CI: 1.50-2.01;  $p < 0.001$ ) in 2000-2009, and it was stable in 2010-  
26 2018 (1.72, 95% CI: 1.39-2.13;  $p < 0.001$ ). The RR was higher in studies assessing  
27 appropriateness of empiric therapy (RR=1.75; 95% CI 1.54-1.99;  $p < 0.001$ ) than in those that  
28 did not (RR=1.55; 95% CI 1.26-1.90;  $p < 0.001$ ). The subgroup analysis by pathogen showed  
29 that ESBL production increased the RR in BSIs due to *E. coli* (RR=1.82; 95% CI: 1.50-2.21;  
30  $p < 0.001$ ) compared to those due to *K. pneumoniae* (RR=1.48; 95% CI: 1.17-1.87;  $p = 0.001$ ).  
31 Stratification by population age showed a higher RR in paediatric population (RR=2.09; 95%  
32 CI: 1.62-2.71;  $p < 0.001$ ). Effect estimates did not vary significantly by study country,  
33 mortality time assessment (14 vs 28 days), ESBL molecular resistance mechanisms, or study



1 design (Figure 2 and online supplementary figure 4). Adjusted estimates for inappropriate  
2 empirical antibiotic therapy were provided for 14 studies. The pooled unadjusted OR for all-  
3 cause mortality was 2.91 (95% CI: 2.23-3.81;  $p < 0.001$ ,  $I^2 = 27.1\%$ ;  $p = 0.164$ ) and the pooled  
4 OR after adjusting for receipt of appropriate empirical treatment was 3.22 (95% CI: 1.53-  
5 6.76;  $p = 0.002$ ;  $I^2 = 87.5\%$ ;  $p < 0.001$ ). The impact of ESBL production on LOS and mortality  
6 varied according to the infection type, with higher effect in intra-abdominal, respiratory and  
7 BSIs (supplemental figure 5 and 6).

### 8 **Attributable mortality**

9 Attributable mortality was analysed in 16 studies including 2,885 patients. All studies were  
10 performed in HICs. ESBL production in patients with BSIs increased the risk of attributable  
11 mortality by a factor of 1.75 (95% CI: 1.45-2.11;  $p < 0.001$ ;  $I^2 = 0\%$ ;  $p < 0.001$ ). The RR  
12 increased over time from 1.53 (95% CI: 1.10-2.12;  $p = 0.011$ ) in 1991-1999 to 1.91 (95% CI:  
13 1.43-2.54;  $p < 0.001$ ) in 2000-2009 (Figure 3). Pathogen-specific RR for attributable mortality  
14 was 1.60 (95% CI: 1.18-2.15;  $p = 0.002$ ) for *K. pneumoniae* and 1.76 (95% CI: 1.33-2.34;  
15  $p < 0.001$ ) when the gram-negative organisms were analysed all together without species  
16 differentiation. The subgroup analysis showed the RR was lower in case cohort studies (1.56;  
17 95% CI: 1.09-2.25;  $p = 0.016$ ) than in cohort studies (1.80; 95% CI: 1.37-2.37;  $p < 0.001$ ).

### 18 **Length of stay**

19 LOS data were provided in 37 studies (17 on BSIs and 8 on non-invasive) analysing 38  
20 outcome measures. The WMD of LOS in patients with BSIs was 4.41 days (95% CI: 3.37-  
21 5.46;  $p < 0.001$ ) and decreased from 5.72 days (95% CI: 2.69-8.75;  $p < 0.001$ ) in 1991-1999 to  
22 4.22 days (95% CI: 3.02-5.43;  $p < 0.001$ ) in 2000-2009 and was stable up to 2018 (4.30 days;  
23 95% CI: 1.38-7.22;  $p = 0.004$ ). Higher WMD ( $p < 0.001$ ) was observed for BSIs due to *K.*  
24 *pneumoniae* (7.67 days; 4.63-10.71) than for those due to *E. coli* (6.07 days; 95% CI 3.71-  
25 8.43). Retrospective cohort studies reported higher ( $p < 0.001$ ) WMD (6.43 days; 95% CI:  
26 4.66-8.21;  $p < 0.001$ ) than case cohort studies (3.32 days; 95% CI: 2.03-4.61). Studies in HICs  
27 showed higher WMD (4.56 days; 95% CI 3.43-5.70;  $p < 0.001$ ) than studies in LMICs (3.55  
28 days; 95% CI 0.84-6.26;  $p = 0.01$ ) (Figure 4).

29 Studies with non-invasive infections reported a WMD of 2.19 days (95% CI: 1.56-2.81;  
30  $p < 0.001$ ), which decreased from 7.66 (95% CI: 5.83-9.46;  $p < 0.001$ ) in 2000-2009 to 1.44  
31 (95% CI: 0.77-2.10;  $p < 0.001$ ) in 2010-2018 (online supplementary figure 7).

1  
2  
3 1 The data on ICU-LOS were provided in 7 studies and showed that BSIs caused by ESBL  
4 2 producers had a WMD of LOS of 3.07 days (95% CI: 1.61-4.54;  $p < 0.001$ ).

6  
7 3 Heterogeneity of the studied effect-modifiers did not reach statistical significance when  
8 4 assessed by metaregression (supplementary table S6). Sensitivity analysis based on the quality  
9 5 of studies revealed no notable difference in the effect estimates after exclusion of low-quality  
10 6 studies (data not shown). Egger's test and the funnel plots (online supplementary figure 1 and  
11 7 2) showed evidence for small study effects ( $p < 0.001$ ) and publication bias.

## 16 8 **DISCUSSION**

18 9 This systematic review shows that ESBL production has a significant impact on the most  
19 10 relevant patient-related clinical outcomes. In the subgroup analyses, all-cause mortality,  
20 11 attributable mortality, and LOS both in hospital and in ICU were higher for patients with BSIs  
21 12 due to ESBL-producing *Enterobacteriaceae* than for patients with BSIs due to non-ESBL-  
22 13 producing strains. Non-invasive infections caused by ESBL-producing strains were associated  
23 14 with higher all-cause mortality and prolonged LOS. Within the limitation of the low number  
24 15 of studies evaluating specific patient populations, paediatric and cancer patients seemed to  
25 16 suffer a higher impact of ESBL invasive infections than the overall population. Stratifying by  
26 17 pathogen type, the impact of ESBL production was higher for *E. coli* BSIs than for *K.*  
27 18 *pneumoniae* BSIs. No relevant differences in mortality analysis emerged with stratification by  
28 19 study design or country income level. Impact of ESBL infections on mortality became more  
29 20 evident in more recent studies. Studies reporting on appropriateness of empirical therapy,  
30 21 ESBL resistance mechanisms, and MICs showed a higher clinical impact of ESBL infections  
31 22 than studies not assessing these variables. In particular, pooled ORs adjusted for inappropriate  
32 23 empirical treatment, showed a remarkably higher OR for mortality in patients with ESBL  
33 24 infections.

34 25 Our findings confirm the results of previous systematic reviews. Schwaber et al. performed a  
35 26 systematic review comparing mortality in ESBL BSIs and non-ESBL BSIs in studies  
36 27 published through 2003.<sup>2</sup> The authors show a pooled RR for all-cause mortality of 1.85 but, in  
37 28 contrast to our study, they combined *E. coli*, *Klebsiella* spp., and *Proteus* spp. in the analysis  
38 29 because of sample size limitations. Rottier et al. analysed studies published through 2010 and  
39 30 adjusting results for inappropriate empirical treatment found an adjusted OR of 1.37.<sup>3</sup> Our  
40 31 study, adding more than 50 studies in 17 years to the Rottier systematic review, confirmed the  
41 32 clinical importance of ESBL production to all-cause mortality and for the first time assessed  
42 33 the role of ESBL production on attributable mortality. We addressed relevant effect-modifiers

1 through subgroup analyses and found that population, pathogen, and assessment of empiric  
2 therapy all had an impact on estimates. Because we believe that appropriate empirical  
3 treatment plays a relevant role in invasive infections, we performed a secondary analysis by  
4 pooling only adjusted ORs and confirming the significant impact of antibiotic resistance as  
5 already shown in a previously published systematic review.<sup>97</sup> The lack of consideration of  
6 appropriateness of therapy in the studies evaluating mortality seems to underestimate the  
7 impact of ESBL production on mortality. However, studies assessing the impact of  
8 appropriate therapy did not provide homogeneous definition and could refer either to  
9 empirical or definite therapy or a single component irrespective of the dosage, making results  
10 difficult to interpret. Especially in infections with different sources and different clinical  
11 severity, the sole contribution of empirical therapy remains challenging to measure. For  
12 example, patients with UTI receiving inappropriate empirical antibiotic therapy can  
13 potentially show a favourable outcome, most probably due to the high concentration of  
14 antibiotic reached in the urinary tract.<sup>98</sup>

15 Community acquired ESBL infections emerged in the late 1990s and show an increasing  
16 trend.<sup>99,100</sup> Recent study shows that community onset ESBL infections are associated with  
17 lower mortality compared with healthcare associated and hospital acquired infections.<sup>101</sup> The  
18 place of acquisition could not be appropriately addressed in our meta-analysis due to the lack  
19 of data in included studies.

20 Our systematic review contributes to the discussion on the limitation of current evidence for  
21 the estimation of mortality due to antibiotic-resistant infections. The impact of ESBL  
22 production on LOS in our study has shown that both BSIs and non-invasive infections lead to  
23 prolongation of hospitalisation.

24  
25 Our study has some limitations. Although results of the meta-analyses were significant in all  
26 the subgroups, we could analyse only a limited number of studies providing information for  
27 subgroups such as haematological patients and low-income countries, making generalizability  
28 of results less certain for these specific patient populations. Only a few studies reported MIC  
29 data or specific ESBL molecular resistant phenotype (i.e., AmpC). Moreover, publication bias  
30 was detected in both the main analyses (all-cause mortality and LOS), thus implying the  
31 possibility that results from small studies with non-significant results might have been  
32 conducted and not published, resulting in a possible overestimation of our results. The non-  
33 homogeneous reporting of some relevant data in published literature (e.g., infection type,

1  
2  
3 1 presence of bacteremia, disease severity, underlying comorbidities and resistance mechanism)  
4 2 may also have affected the precision of the estimate. A limited number of patients with non-  
5 3 bacteremic infections was included in our systematic review, thus limiting the generalizability  
6 4 of results to this patients' population. Moreover, patients with ESBL are intrinsically at higher  
7 5 risk of mortality and complications because they are often older, have more comorbidities or  
8 6 higher antibiotic exposure, and are at higher risk of receiving inappropriate empirical  
9 7 treatment.<sup>102</sup> Finally, due to resource constraints, we had to limit our search to PubMed  
10 8 database with the chance of missing relevant studies.

11 9 In summary, our systematic review emphasises the importance of suspicion and confirmation  
12 10 of ESBL production as soon as possible for invasive infections and demonstrates that ESBL  
13 11 production increases the risk of attributable mortality and LOS in both hospital and ICU for  
14 12 invasive and non-invasive infections. Patients with ESBL infections remain at higher risk of  
15 13 mortality and prolonged LOS even after adjustment for empiric inappropriate treatment.  
16 14 Control for other relevant effect-modifiers is hindered by the sparseness of published data.  
17 15 Individual patient data (IPD) network meta-analyses are needed to define differences in  
18 16 outcomes between severe intravascular infections and bacteremia. Future studies addressing  
19 17 the clinical burden of drug-resistant infections must include ESBL production and should  
20 18 assess both the impact of molecular mechanisms of resistance and effect on specific patient  
21 19 populations such as haematological patients and those in LMIC.

22 20 **Acknowledgements** We thank Anne McDonough, a professional medical writer who  
23 21 provided medical writing support funded by the authors.

24 22 **Author Contributions** ET contributed to the study concept. BPG and PS performed data  
25 23 analysis. PS and AC extracted data and wrote the first draft of the manuscript. DL contributed  
26 24 to the first draft of the manuscript. EC and ET wrote the final version of the manuscript. CB  
27 25 reviewed the paper. All authors read, edited, and approved the final manuscript. The  
28 26 corresponding author had full access to all the data in the study and had final responsibility  
29 27 for the decision to submit for publication.

30 28 **Funding** This work was supported by the German Center for Infection Research Clinical  
31 29 Research Unit for Health-Care Associated Infections grant number TTU 08.701 and DRIVE-  
32 30 AB (115618). The funder had no involvement in the study design; in the collection, analysis  
33 31 and interpretation of the data; in the writing of the report; or in the decision to submit the  
34 32 paper for publication.

35 33 **Competing interests** The authors report no competing interests.

1 **Patient consent** Not required

2 **Provenance and peer review** Not commissioned; externally peer reviewed.

3 **Data sharing statement** Requests for data should be addressed to the corresponding author.

4  
5 **Open access This is an open access article distributed in accordance with** the Creative  
6 Commons Attribution Non Commercial (CC BY-NC 4.0) license, which permits others to  
7 distribute, remix, adapt, build upon this work non-commercially, and license their derivative  
8 works on different terms, provided the original work is properly cited, appropriate credit is  
9 given, any changes made indicated, and the use is non-commercial. See: [http://](http://creativecommons.org/licenses/by-nc/4.0/)  
10 [creativecommons.org/licenses/by-nc/4.0/](http://creativecommons.org/licenses/by-nc/4.0/).

11

## 1 REFERENCES

1. Tacconelli E, Carrara E, Savoldi A, et al. Discovery, research, and development of new antibiotics: the WHO priority list of antibiotic-resistant bacteria and tuberculosis. *Lancet Infect Dis* 2018;18:318–27.
2. Schwaber MJ, Carmeli Y. Mortality and delay in effective therapy associated with extended-spectrum beta-lactamase production in Enterobacteriaceae bacteraemia: a systematic review and meta-analysis. *J Antimicrob Chemother* 2007;60:913–20.
3. Rottier WC, Ammerlaan HS, Bonten MJ. Effects of confounders and intermediates on the association of bacteraemia caused by extended-spectrum beta-lactamase-producing Enterobacteriaceae and patient outcome: a meta-analysis. *J Antimicrob Chemother* 2012;67:1311–20.
4. Cassini A, Högberg LD, Plachouras D, et al; Attributable deaths and disability-adjusted life-years caused by infections with antibiotic-resistant bacteria in the EU and the European Economic Area in 2015: a population-level modelling analysis. *Lancet Infect Dis* 2019;19:56–66.
5. The World Bank. What is the World Bank Atlas method? <https://datahelpdesk.worldbank.org/knowledgebase/articles/77933-what-is-the-world-bank-atlas-method>. Accessed January 14, 2019.
6. Rodriguez-Bano J, Gutierrez-Gutierrez B, Machuca I et al. Treatment of Infections Caused by Extended-Spectrum-Beta-Lactamase-, AmpC-, and Carbapenemase-Producing Enterobacteriaceae. *Clin Microbiol Rev* 2018; 31. doi:10.1128/CMR.00079-17
7. Wells GA, Shea B, O'Connell D, Peterson J, Welch V, Losos M *et al*. The Newcastle–Ottawa Scale (NOS) for assessing the quality of nonrandomized studies in meta-analyses. The Ottawa Health Research Institute: Ottawa, Canada. [http://www.ohri.ca/programs/clinical\\_epidemiology/oxford.htm](http://www.ohri.ca/programs/clinical_epidemiology/oxford.htm). Accessed April 14 2015
8. Higgins JPT, Green S (editors). *Cochrane Handbook for Systematic Reviews of Interventions* Version 5.1.0 [updated March 2011]. The Cochrane Collaboration, 2011. Available from <http://handbook.cochrane.org>.
9. Moher D, Liberati A, Tetzlaff J, et al. Preferred reporting items for systematic reviews and meta-analyses: the PRISMA statement. *BMJ* 2009;339:b2535.
10. Lautenbach E, Patel JB, Bilker WB, et al. Extended-spectrum beta-lactamase-producing *Escherichia coli* and *Klebsiella pneumoniae*: risk factors for infection and impact of resistance on outcomes. *Clin Infect Dis* 2001;32:1162–71.

- 1 11. Leistner R, Sakellariou C, Gurntke S, et al. Mortality and molecular epidemiology  
2 associated with extended-spectrum beta-lactamase production in *Escherichia coli* from  
3 bloodstream infection. *Infect Drug Resist* 2014;7:57–62.
- 4 12. Lin JN, Chen YH, Chang LL, et al. Clinical characteristics and outcomes of patients with  
5 extended-spectrum beta-lactamase-producing bacteremias in the emergency department.  
6 *Intern Emerg Med* 2011;6:547–55.
- 7 13. Kim HJ, Park JH, Park DI, et al. Clinical impact of extended-spectrum beta-lactamase-  
8 producing Enterobacteriaceae in patients with biliary tract infection. *Dig Dis Sci*  
9 2013;58:841–9.
- 10 14. Kim SH, Kwon JC, Choi SM, et al. *Escherichia coli* and *Klebsiella pneumoniae*  
11 bacteremia in patients with neutropenic fever: factors associated with extended-spectrum  
12 beta-lactamase production and its impact on outcome. *Ann Hematol* 2013;92:533–41.
- 13 15. Pillay T, Pillay DG, Adhikari M, et al. Piperacillin/tazobactam in the treatment of  
14 *Klebsiella pneumoniae* infections in neonates. *Am J Perinatol* 1998;15:47–51.
- 15 16. Kim BN, Woo JH, Kim MN, et al. Clinical implications of extended-spectrum beta-  
16 lactamase-producing *Klebsiella pneumoniae* bacteraemia. *J Hosp Infect* 2002;52:99–106.
- 17 17. Kim YK, Pai H, Lee HJ, et al. Bloodstream infections by extended-spectrum beta-  
18 lactamase-producing *Escherichia coli* and *Klebsiella pneumoniae* in children:  
19 epidemiology and clinical outcome. *Antimicrob Agents Chemother* 2002;46:1481–91.
- 20 18. Bhavnani SM, Ambrose PG, Craig WA, et al. Outcomes evaluation of patients with  
21 ESBL- and non-ESBL-producing *Escherichia coli* and *Klebsiella* species as defined by  
22 CLSI reference methods: report from the SENTRY Antimicrobial Surveillance Program.  
23 *Diagn Microbiol Infect Dis* 2006;54:231–6.
- 24 19. Blomberg B, Jureen R, Manji KP, et al. High rate of fatal cases of pediatric septicemia  
25 caused by gram-negative bacteria with extended-spectrum beta-lactamases in Dar es  
26 Salaam, Tanzania. *J Clin Microbiol* 2005;43:745–9.
- 27 20. Panhotra BR, Saxena AK, Al-Ghamdi AM. Extended-spectrum beta-lactamase-producing  
28 *Klebsiella pneumoniae* hospital acquired bacteremia. Risk factors and clinical outcome.  
29 *Saudi Med J* 2004;25:1871–6.
- 30 21. Marra AR, Wey SB, Castelo A, et al. Nosocomial bloodstream infections caused by  
31 *Klebsiella pneumoniae*: impact of extended-spectrum beta-lactamase (ESBL) production  
32 on clinical outcome in a hospital with high ESBL prevalence. *BMC Infect Dis* 2006;6:24.

- 1 22. Skippen I, Shemko M, Turton J, et al. Epidemiology of infections caused by extended-  
2 spectrum beta-lactamase-producing *Escherichia coli* and *Klebsiella* spp.: a nested case-  
3 control study from a tertiary hospital in London. *J Hosp Infect* 2006;64:115–23.
- 4 23. Schwaber MJ, Navon-Venezia S, Kaye KS, et al. Clinical and economic impact of  
5 bacteremia with extended-spectrum-beta-lactamase-producing *Enterobacteriaceae*.  
6 *Antimicrob Agents Chemother* 2006;50:1257–62.
- 7 24. Apisarnthanarak A, Kiratisin P, Saifon P, et al. Clinical and molecular epidemiology of  
8 community-onset, extended-spectrum beta-lactamase-producing *Escherichia coli*  
9 infections in Thailand: a case-case-control study. *Am J Infect Control* 2007;35:606–12.
- 10 25. Tumbarello M, Spanu T, Sanguinetti M, et al. Bloodstream infections caused by extended-  
11 spectrum-beta-lactamase-producing *Klebsiella pneumoniae*: risk factors, molecular  
12 epidemiology, and clinical outcome. *Antimicrob Agents Chemother* 2006;50:498–504.
- 13 26. Apisarnthanarak A, Kiratisin P, Saifon P, et al. Risk factors for and outcomes of  
14 healthcare-associated infection due to extended-spectrum beta-lactamase-producing  
15 *Escherichia coli* or *Klebsiella pneumoniae* in Thailand. *Infect Control Hosp Epidemiol*  
16 2007;28:873–6. doi: 10.1086/518725
- 17 27. Kanafani ZA, Mehio-Sibai A, Araj GF, et al. Epidemiology and risk factors for extended-  
18 spectrum beta-lactamase-producing organisms: a case control study at a tertiary care  
19 center in Lebanon. *Am J Infect Control* 2005;33:326–32.
- 20 28. Zaoutis TE, Goyal M, Chu JH, et al. Risk factors for and outcomes of bloodstream  
21 infection caused by extended-spectrum beta-lactamase-producing *Escherichia coli* and  
22 *Klebsiella* species in children. *Pediatrics* 2005;115:942–9.
- 23 29. Loh LC, Nor Izran Hanim Bt Abdul S, Rosdara Masayuni Bt Mohd S, et al. Hospital  
24 Outcomes of Adult Respiratory Tract Infections with Extended-Spectrum B-Lactamase  
25 (ESBL) Producing *Klebsiella pneumoniae*. *Malays J Med Sci* 2007;14:36–40.
- 26 30. Melzer M, Petersen I. Mortality following bacteraemic infection caused by extended  
27 spectrum beta-lactamase (ESBL) producing *E. coli* compared to non-ESBL producing *E.*  
28 *coli*. *J Infect* 2007;55:254–9. doi: 10.1016/j.jinf.2007.04.007
- 29 31. Song KH, Jeon JH, Park WB, et al. Clinical outcomes of spontaneous bacterial peritonitis  
30 due to extended-spectrum beta-lactamase-producing *Escherichia coli* and *Klebsiella*  
31 species: a retrospective matched case-control study. *BMC Infect Dis* 2009;9:41.
- 32 32. Bennett JW, Robertson JL, Hospenthal DR, et al. Impact of extended spectrum beta-  
33 lactamase producing *Klebsiella pneumoniae* infections in severely burned patients. *J Am*  
34 *Coll Surg* 2010;211:391–9.



- 1  
2  
3 1 33. Trecarichi EM, Tumbarello M, Spanu T, et al. Incidence and clinical impact of extended-  
4 2 spectrum-beta-lactamase (ESBL) production and fluoroquinolone resistance in  
5 3 bloodstream infections caused by *Escherichia coli* in patients with hematological  
6 4 malignancies. *J Infect* 2009;58:299–307.
- 7 5 34. Tuon FF, Kruger M, Terreri M, et al. *Klebsiella* ESBL bacteremia-mortality and risk  
8 6 factors. *Braz J Infect Dis* 2011;15:594–8.
- 9 7 35. Kang CI, Song JH, Chung DR, et al. Risk factors and treatment outcomes of community-  
10 8 onset bacteraemia caused by extended-spectrum beta-lactamase-producing *Escherichia*  
11 9 *coli*. *Int J Antimicrob Agents* 2010;36:284–7.
- 12 10 36. Pena C, Gudiol C, Calatayud L, et al. Infections due to *Escherichia coli* producing  
13 11 extended-spectrum beta-lactamase among hospitalised patients: factors influencing  
14 12 mortality. *J Hosp Infect* 2008;68:116–22.
- 15 13 37. Tumbarello M, Spanu T, Di Bidino R, et al. Costs of bloodstream infections caused by  
16 14 *Escherichia coli* and influence of extended-spectrum-beta-lactamase production and  
17 15 inadequate initial antibiotic therapy. *Antimicrob Agents Chemother* 2010;54:4085–91.
- 18 16 38. Kang CI, Chung DR, Ko KS, et al. Risk factors for infection and treatment outcome of  
19 17 extended-spectrum beta-lactamase-producing *Escherichia coli* and *Klebsiella pneumoniae*  
20 18 bacteremia in patients with hematologic malignancy. *Ann Hematol* 2012;91:115–21.
- 21 19 39. Wu YH, Chen PL, Hung YP, et al. Risk factors and clinical impact of levofloxacin or  
22 20 cefazolin nonsusceptibility or ESBL production among uropathogens in adults with  
23 21 community-onset urinary tract infections. *J Microbiol Immunol Infect* 2014;47:197–203.
- 24 22 40. Rodriguez-Bano J, Picon E, Gijon P, et al. Community-onset bacteremia due to extended-  
25 23 spectrum beta-lactamase-producing *Escherichia coli*: risk factors and prognosis. *Clin*  
26 24 *Infect Dis* 2010;50:40–8.
- 27 25 41. Gurntke S, Kohler C, Steinmetz I, et al. Molecular epidemiology of extended-spectrum  
28 26 beta-lactamase (ESBL)-positive *Klebsiella pneumoniae* from bloodstream infections and  
29 27 risk factors for mortality. *J Infect Chemother* 2014;20:817–9.
- 30 28 42. Oh MM, Chae JY, Kim JW, et al. Positive culture for extended-spectrum beta-lactamase  
31 29 during acute prostatitis after prostate biopsy is a risk factor for progression to chronic  
32 30 prostatitis. *Urology* 2013;81:1209–12.
- 33 31 43. Leistner R, Gurntke S, Sakellariou C, et al. Bloodstream infection due to extended-  
34 32 spectrum beta-lactamase (ESBL)-positive *K. pneumoniae* and *E. coli*: an analysis of the  
35 33 disease burden in a large cohort. *Infection* 2014;42:991–7.

- 1  
2  
3 1 44. Ku NS, Chung HS, Choi JY, et al. Clinical usefulness of the 2010 clinical and laboratory  
4 standards institute revised breakpoints for cephalosporin use in the treatment of  
5 2 bacteremia caused by *Escherichia coli* or *Klebsiella* spp. *Biomed Res Int*  
6 3 2015;2015:831074.  
7 4  
8 5  
9 5 45. Anunnatsiri S, Towiwat P, Chaimanee P. Risk factors and clinical outcomes of extended  
10 6 spectrum beta-lactamase (ESBL)-producing *Escherichia coli* septicemia at Srinagarind  
11 7 University Hospital, Thailand. *Southeast Asian J Trop Med Public Health* 2012;43:1169–  
12 8 77.  
13 9  
14 9 46. Kang CI, Kim SH, Kim DM, et al. Risk factors for and clinical outcomes of bloodstream  
15 10 infections caused by extended-spectrum beta-lactamase-producing *Klebsiella*  
16 11 *pneumoniae*. *Infect Control Hosp Epidemiol* 2004;25:860–7.  
17 12  
18 12 47. Raviv Y, Shitrit D, Amital A, et al. Multidrug-resistant *Klebsiella pneumoniae* acquisition  
19 13 in lung transplant recipients. *Clin Transplant* 2012;26:E388–94.  
20 14  
21 14 48. MacVane SH, Tuttle LO, Nicolau DP. Impact of extended-spectrum beta-lactamase-  
22 15 producing organisms on clinical and economic outcomes in patients with urinary tract  
23 16 infection. *J Hosp Med* 2014;9:232–8.  
24 17  
25 17 49. Abhilash KP, Veeraraghavan B, Abraham OC. Epidemiology and outcome of bacteremia  
26 18 caused by extended spectrum beta-lactamase (ESBL)-producing *Escherichia coli* and  
27 19 *Klebsiella* spp. in a tertiary care teaching hospital in south India. *J Assoc Physicians India*  
28 20 2010;58 Suppl:13-7.  
29 21  
30 21 50. Shanthi M, Sekar U. Extended spectrum beta lactamase producing *Escherichia coli* and  
31 22 *Klebsiella pneumoniae*: risk factors for infection and impact of resistance on outcomes. *J*  
32 23 *Assoc Physicians India* 2010;58 Suppl:41–4.  
33 24  
34 24 51. Han SB, Jung SW, Bae EY, et al. Extended-spectrum beta-lactamase-producing  
35 25 *Escherichia coli* and *Klebsiella pneumoniae* bacteremia in febrile neutropenic children.  
36 26 *Microb Drug Resist* 2015;21:244–51.  
37 27  
38 27 52. Lee S, Song DY, Cho SH, et al. Impact of extended-spectrum beta-lactamase on acute  
39 28 pyelonephritis treated with empirical ceftriaxone. *Microb Drug Resist* 2014;20:39–44.  
40 29  
41 29 53. Chayakulkeeree M, Junsriwong P, Keerasuntonpong A, et al. Epidemiology of extended-  
42 30 spectrum beta-lactamase producing gram-negative bacilli at Siriraj Hospital, Thailand,  
43 31 2003. *Southeast Asian J Trop Med Public Health* 2005;36:1503–9.  
44 32  
45 32 54. Apisarnthanarak A, Kiratisin P, Mundy LM. Predictors of mortality from community-  
46 33 onset bloodstream infections due to extended-spectrum beta-lactamase-producing  
47  
48  
49  
50  
51  
52  
53  
54  
55  
56  
57  
58  
59  
60

- 1  
2  
3 1 Escherichia coli and Klebsiella pneumoniae. *Infect Control Hosp Epidemiol* 2008;29:671–  
4 4.  
5 2  
6 3  
7 3 55. Apisarnthanarak A, Kiratisin P, Saifon P, et al. Predictors of mortality among patients  
8 4 with community-onset infection due to extended-spectrum beta-lactamase-producing  
9 5 Escherichia coli in Thailand. *Infect Control Hosp Epidemiol* 2008;29:80–2.  
10 6  
11 6 56. Jean SS, Ko WC, Xie Y, et al. Clinical characteristics of patients with community-  
12 7 acquired complicated intra-abdominal infections: a prospective, multicentre, observational  
13 8 study. *Int J Antimicrob Agents* 2014;44:222–8.  
14 9  
15 9 57. Lee J, Pai H, Kim YK, et al. Control of extended-spectrum beta-lactamase-producing  
16 10 Escherichia coli and Klebsiella pneumoniae in a children's hospital by changing  
17 11 antimicrobial agent usage policy. *J Antimicrob Chemother* 2007;60:629–37.  
18 12  
19 12 58. Briongos-Figuero LS, Gomez-Traveso T, Bachiller-Luque P, et al. Epidemiology, risk  
20 13 factors and comorbidity for urinary tract infections caused by extended-spectrum beta-  
21 14 lactamase (ESBL)-producing enterobacteria. *Int J Clin Pract* 2012;66:891–6.  
22 15  
23 15 59. Ha YE, Kang CI, Cha MK, et al. Epidemiology and clinical outcomes of bloodstream  
24 16 infections caused by extended-spectrum beta-lactamase-producing Escherichia coli in  
25 17 patients with cancer. *Int J Antimicrob Agents* 2013;42:403–9.  
26 18  
27 18 60. Du B, Long Y, Liu H, et al. Extended-spectrum beta-lactamase-producing Escherichia  
28 19 coli and Klebsiella pneumoniae bloodstream infection: risk factors and clinical outcome.  
29 20 *Intensive Care Med* 2002;28:1718–23.  
30 21  
31 21 61. Stone PW, Gupta A, Loughrey M, et al. Attributable costs and length of stay of an  
32 22 extended-spectrum beta-lactamase-producing Klebsiella pneumoniae outbreak in a  
33 23 neonatal intensive care unit. *Infect Control Hosp Epidemiol* 2003;24:601–6.  
34 24  
35 24 62. Pena C, Pujol M, Ardanuy C, et al. An outbreak of hospital-acquired Klebsiella  
36 25 pneumoniae bacteraemia, including strains producing extended-spectrum beta-lactamase.  
37 26 *J Hosp Infect* 2001;47:53–9.  
38 27  
39 27 63. Kola A, Maciejewski O, Sohr D, et al. Clinical impact of infections caused by ESBL-  
40 28 producing E. coli and K. pneumoniae. *Scand J Infect Dis* 2007;39:975–82.  
41 29  
42 29 64. Tsai MH, Lee IT, Chu SM, et al. Clinical and Molecular Characteristics of Neonatal  
43 30 Extended-Spectrum beta-Lactamase-Producing Gram-Negative Bacteremia: A 12-Year  
44 31 Case-Control-Control Study of a Referral Center in Taiwan. *PLoS One*  
45 32 2016;11(8):e0159744.  
46  
47  
48  
49  
50  
51  
52  
53  
54  
55  
56  
57  
58  
59  
60

- 1  
2  
3 1 65. Maslikowska JA, Walker SA, Elligsen M, et al. Impact of infection with extended-  
4 spectrum beta-lactamase-producing *Escherichia coli* or *Klebsiella* species on outcome and  
5 2 hospitalization costs. *J Hosp Infect* 2016;92:33–41.  
6 3  
7 8  
8 4 66. Onken A, Said AK, Jorstad M, et al. Prevalence and antimicrobial resistance of microbes  
9 5 causing bloodstream infections in Unguja, Zanzibar. *PLoS One* 2015;10:e0145632.  
10 6  
11 67. Nguyen ML, Toye B, Kanji S, et al. Risk factors for and outcomes of bacteremia caused  
12 7 by extended-spectrum  $\beta$ -lactamase-producing *Escherichia coli* and *Klebsiella* species at a  
13 8 Canadian tertiary care hospital. *Can J Hosp Pharm* 2015;68(2):136–43. [published Online  
14 9 First: 2015/05/13]  
15 10  
16 68. Denis B, Lafaurie M, Donay JL, et al. Prevalence, risk factors, and impact on clinical  
17 11 outcome of extended-spectrum beta-lactamase-producing *Escherichia coli* bacteraemia: a  
18 12 five-year study. *Int J Infect Dis* 2015;39:1–6.  
19 13  
20 69. Chopra T, Marchaim D, Johnson PC, et al. Risk factors for bloodstream infection caused  
21 14 by extended-spectrum beta-lactamase-producing *Escherichia coli* and *Klebsiella*  
22 15 pneumoniae: A focus on antimicrobials including cefepime. *Am J Infect Control*  
23 16 2015;43:719–23.  
24 17  
25 70. Artero A, Esparcia A, Alberola J, et al. Prospective cohort study of risk factors for  
26 18 extended-spectrum ss-lactamase-producing *Escherichia coli* urinary tract infections in  
27 19 elderly patients admitted to hospital. *Int J Clin Pract* 2017;71:doi:10.1111/ijcp.13001  
28 20  
29 71. Chen IL, Huang HC, Wu CT, et al. Analysis of early-onset bloodstream infection due to  
30 21 *Escherichia coli* infection in premature babies. *Medicine* 2017;96:e7748.  
31 22  
32 72. Islas-Munoz B, Volkow-Fernandez P, Ibanes-Gutierrez C, et al. Bloodstream infections in  
33 23 cancer patients. Risk factors associated with mortality. *Int J Infect Dis* 2018;71:59–64.  
34 24  
35 73. Ma J, Li N, Liu Y, et al. Antimicrobial resistance patterns, clinical features, and risk  
36 25 factors for septic shock and death of nosocomial *E coli* bacteremia in adult patients with  
37 26 hematological disease: A monocenter retrospective study in China. *Medicine*  
38 27 2017;96:e6959.  
39 28  
40 74. Man MY, Shum HP, Chan YH, et al. Clinical predictors and outcomes of *Klebsiella*  
41 29 pneumoniae bacteraemia in a regional hospital in Hong Kong. *J Hosp Infect* 2017;97:35–  
42 30 41.  
43 31  
44 75. Marando R, Seni J, Mirambo MM, et al. Predictors of the extended-spectrum-beta  
45 32 lactamases producing Enterobacteriaceae neonatal sepsis at a tertiary hospital, Tanzania.  
46 33 *Int J Med Microbiol* 2018;308:803–11.  
47  
48  
49  
50  
51  
52  
53  
54  
55  
56  
57  
58  
59  
60

- 1  
2  
3 1 76. Namikawa H, Yamada K, Fujimoto H, et al. Clinical characteristics of bacteremia caused  
4 by extended-spectrum beta-lactamase-producing *Escherichia coli* at a tertiary hospital.  
5 2  
6 *Intern Med* 2017;56:1807–15.  
7 3  
8 4 77. Shi SH, Feng XN, Lai MC, et al. Biliary diseases as main causes of pyogenic liver abscess  
9 caused by extended-spectrum beta-lactamase-producing Enterobacteriaceae. *Liver Int*  
10 5  
11 2017;37:727–34.  
12 6  
13 7 78. Tanir Basaranoglu S, Ozsurekci Y, Aykac K, et al. A comparison of blood stream  
14 infections with extended spectrum beta-lactamase-producing and non-producing  
15 8  
16 *Klebsiella pneumoniae* in pediatric patients. *Ital J Pediat* 2017;43:79.  
17 9  
18 10 79. Razazi K, Mekontso Dessap A, Carteaux G, et al. Frequency, associated factors and  
19 outcome of multi-drug-resistant intensive care unit-acquired pneumonia among patients  
20 11  
21 colonized with extended-spectrum beta-lactamase-producing Enterobacteriaceae. *Ann*  
22 12  
23 *Intensive Care* 2017;7:61.  
24 13  
25 14 80. Ray S, Anand D, Purwar S, et al. Association of high mortality with extended-spectrum  
26 beta-lactamase (ESBL) positive cultures in community acquired infections. *J Crit Care*  
27 15  
28 2018;44:255–60.  
29 16  
30 17 81. Haruki Y, Hagiya H, Haruki M, et al. Clinical characteristics and outcome of critically ill  
31 patients with bacteremia caused by extended-spectrum beta-lactamase-producing and non-  
32 18  
33 producing *Escherichia coli*. *J Infect Chemother* 2018;24:944–7.  
34 19  
35 20 82. Lin WT, Tang HJ, Lai CC, et al. Clinical manifestations and bacteriological features of  
36 culture-proven Gram-negative bacterial arthritis. *J Microbiol Immunol Infect*  
37 21  
38 2017;50:527–31.  
39 22  
40 23 83. Buys H, Muloiwa R, Bamford C, et al. *Klebsiella pneumoniae* bloodstream infections at a  
41 South African children's hospital 2006-2011, a cross-sectional study. *BMC Infect Dis*  
42 24  
43 2016;16:570.  
44 25  
45 26 84. Lee CC, Lee CH, Hong MY, et al. Propensity-matched analysis of the impact of extended-  
46 spectrum beta-lactamase production on adults with community-onset *Escherichia coli*,  
47 27  
48 *Klebsiella* species, and *Proteus mirabilis* bacteremia. *J Microbiol Immunol Infect*  
49 28  
50 2018;51:519–26.  
51 29  
52 30 85. Huang YY, Alleyne A, Leung V, et al. Urosepsis due to extended-spectrum beta-  
53 lactamase-producing *Escherichia coli*: a retrospective, single-centre review of risk factors  
54 31  
55 and clinical outcomes. *Can J Hosp Pharm* 2018;71:119-27.  
56 32  
57  
58  
59  
60

- 1  
2  
3 1 86. Komatsu Y, Kasahara K, Inoue T, et al. Molecular epidemiology and clinical features of  
4 2 extended-spectrum beta-lactamase- or carbapenemase-producing *Escherichia coli*  
5 3 bacteremia in Japan. *PLoS One* 2018;13:e0202276.  
6  
7  
8 4 87. Liu M, Li M, Wu L, et al. Extended-spectrum beta-lactamase-producing *E. coli*  
9 5 septicemia among rectal carriers in the ICU. *Medicine* 2018;97:e12445.  
10  
11 6 88. Nivesvivat T, Piyaraj P, Thunyaharn S, et al. Clinical epidemiology, risk factors and  
12 7 treatment outcomes of extended-spectrum beta-lactamase producing Enterobacteriaceae  
13 8 bacteremia among children in a tertiary care hospital, Bangkok, Thailand. *BMC Res Notes*  
14 9 2018;11:624.  
15  
16  
17 10 89. Cordery RJ, Roberts CH, Cooper SJ, et al. Evaluation of risk factors for the acquisition of  
18 11 bloodstream infections with extended-spectrum beta-lactamase-producing *Escherichia coli*  
19 12 and *Klebsiella* species in the intensive care unit; antibiotic management and clinical  
20 13 outcome. *J Hosp Infect* 2008;68:108–15.  
21  
22  
23 14 90. Daikos GL, Kosmidis C, Tassios PT, et al. Enterobacteriaceae bloodstream infections:  
24 15 presence of integrons, risk factors, and outcome. *Antimicrob Agents Chemother*  
25 16 2007;51:2366–72. doi: 10.1128/AAC.00044-07 [published Online First: 2007/04/25]  
26  
27  
28 17 91. Gudiol C, Calatayud L, Garcia-Vidal C, et al. Bacteraemia due to extended-spectrum beta-  
29 18 lactamase-producing *Escherichia coli* (ESBL-EC) in cancer patients: clinical features, risk  
30 19 factors, molecular epidemiology and outcome. *J Antimicrob Chemother* 2010;65(2):333–  
31 20 41.  
32  
33  
34 21 92. Marchaim D, Gottesman T, Schwartz O, et al. National multicenter study of predictors  
35 22 and outcomes of bacteremia upon hospital admission caused by Enterobacteriaceae  
36 23 producing extended-spectrum beta-lactamases. *Antimicrob Agents Chemother*  
37 24 2010;54:5099–104.  
38  
39  
40 25 93. Menashe G, Borer A, Yagupsky P, et al. Clinical significance and impact on mortality of  
41 26 extended-spectrum beta lactamase-producing Enterobacteriaceae isolates in nosocomial  
42 27 bacteremia. *Scand J Infect Dis* 2001;33:188–93.  
43  
44  
45 28 94. Ortega M, Marco F, Soriano A, et al. Analysis of 4758 *Escherichia coli* bacteraemia  
46 29 episodes: predictive factors for isolation of an antibiotic-resistant strain and their impact  
47 30 on the outcome. *J Antimicrob Chemother* 2009;63:568–74.  
48  
49  
50 31 95. Szilagyi E, Fuzi M, Borocz K, et al. Risk factors and outcomes for bloodstream infections  
51 32 with extended-spectrum beta-lactamase-producing *Klebsiella pneumoniae* ; Findings of  
52 33 the nosocomial surveillance system in Hungary. *Acta Microbiol Immunol Hung*  
53 34 2009;56:251–62. doi:

- 1  
2  
3 1 96. Tsai SS, Huang JC, Chen ST, et al. Characteristics of *Klebsiella pneumoniae* bacteremia  
4 in community-acquired and nosocomial infections in diabetic patients. *Chang Gung Med J*  
5 2010;33:532–9.  
6  
7  
8 4 97. Carrara E, Pfeffer I, Zusman O, et al. Determinants of inappropriate empirical antibiotic  
9 treatment: systematic review and meta-analysis. *Int J Antimicrob Agents* 2018;51:548–53,  
10  
11  
12 6 98. Horcajada JP, Shaw E, Padilla B, et al. Healthcare-associated, community-acquired and  
13 hospital-acquired bacteraemic urinary tract infections in hospitalized patients: a  
14 prospective multicentre cohort study in the era of antimicrobial resistance. *Clin Microbiol*  
15 *Infect.* 2013 Oct;19(10):96  
16  
17 9  
18 10 99. Pitout JD, Nordmann P, Laupland KB et al. Emergence of Enterobacteriaceae producing  
19 extended-spectrum beta-lactamases (ESBLs) in the community. *J Antimicrob Chemother*  
20 2005; 56: 52-59. doi:10.1093/jac/dki166  
21  
22 12  
23 13 100. Pitout JD, Laupland KB. Extended-spectrum beta-lactamase-producing  
24 Enterobacteriaceae: an emerging public-health concern. *Lancet Infect Dis* 2008; 8: 159-  
25 166. doi:10.1016/S1473-3099(08)70041-0  
26  
27 15  
28 16 101. Palacios-Baena ZR, Gutierrez-Gutierrez B, De Cueto M et al. Development and  
29 validation of the INCREMENT-ESBL predictive score for mortality in patients with  
30 bloodstream infections due to extended-spectrum-beta-lactamase-producing  
31 Enterobacteriaceae. *J Antimicrob Chemother* 2017; 72: 906-913. doi:10.1093/jac/dkw513  
32  
33 18  
34 19 102. Gandra S, Barter DM, Laxminarayan R. Economic burden of antibiotic resistance:  
35 how much do we really know? *Clin Microbiol Infect* 2014;20:973–80.  
36  
37 20  
38  
39  
40  
41  
42  
43  
44  
45  
46  
47  
48  
49  
50  
51  
52  
53  
54  
55  
56  
57  
58  
59  
60

1  
2  
3 **1 FIGURE LEGENDS**

4 2  
5 3 Figure 1: Literature search and study inclusion and exclusion

6 4  
7 5 Figure 2: Pooled risk ratios for all-cause mortality in patients with ESBL bloodstream  
8 6 infections compared to patients with non-ESBL bloodstream infections— subgroups not  
9 7 included in attributable mortality

10 8  
11 9 Figure 3: Pooled risk ratios for attributable mortality in patients with ESBL bloodstream  
12 10 infections compared to patients with non-ESBL bloodstream infections

13 11  
14 12 Figure 4: Weighted mean difference in the length of stay for patients with ESBL bloodstream  
15 13 infections compared to patients with non-ESBL bloodstream infections

16 14  
17  
18  
19  
20  
21  
22  
23  
24  
25  
26  
27  
28  
29  
30  
31  
32  
33  
34  
35  
36  
37  
38  
39  
40  
41  
42  
43  
44  
45  
46  
47  
48  
49  
50  
51  
52  
53  
54  
55  
56  
57  
58  
59  
60



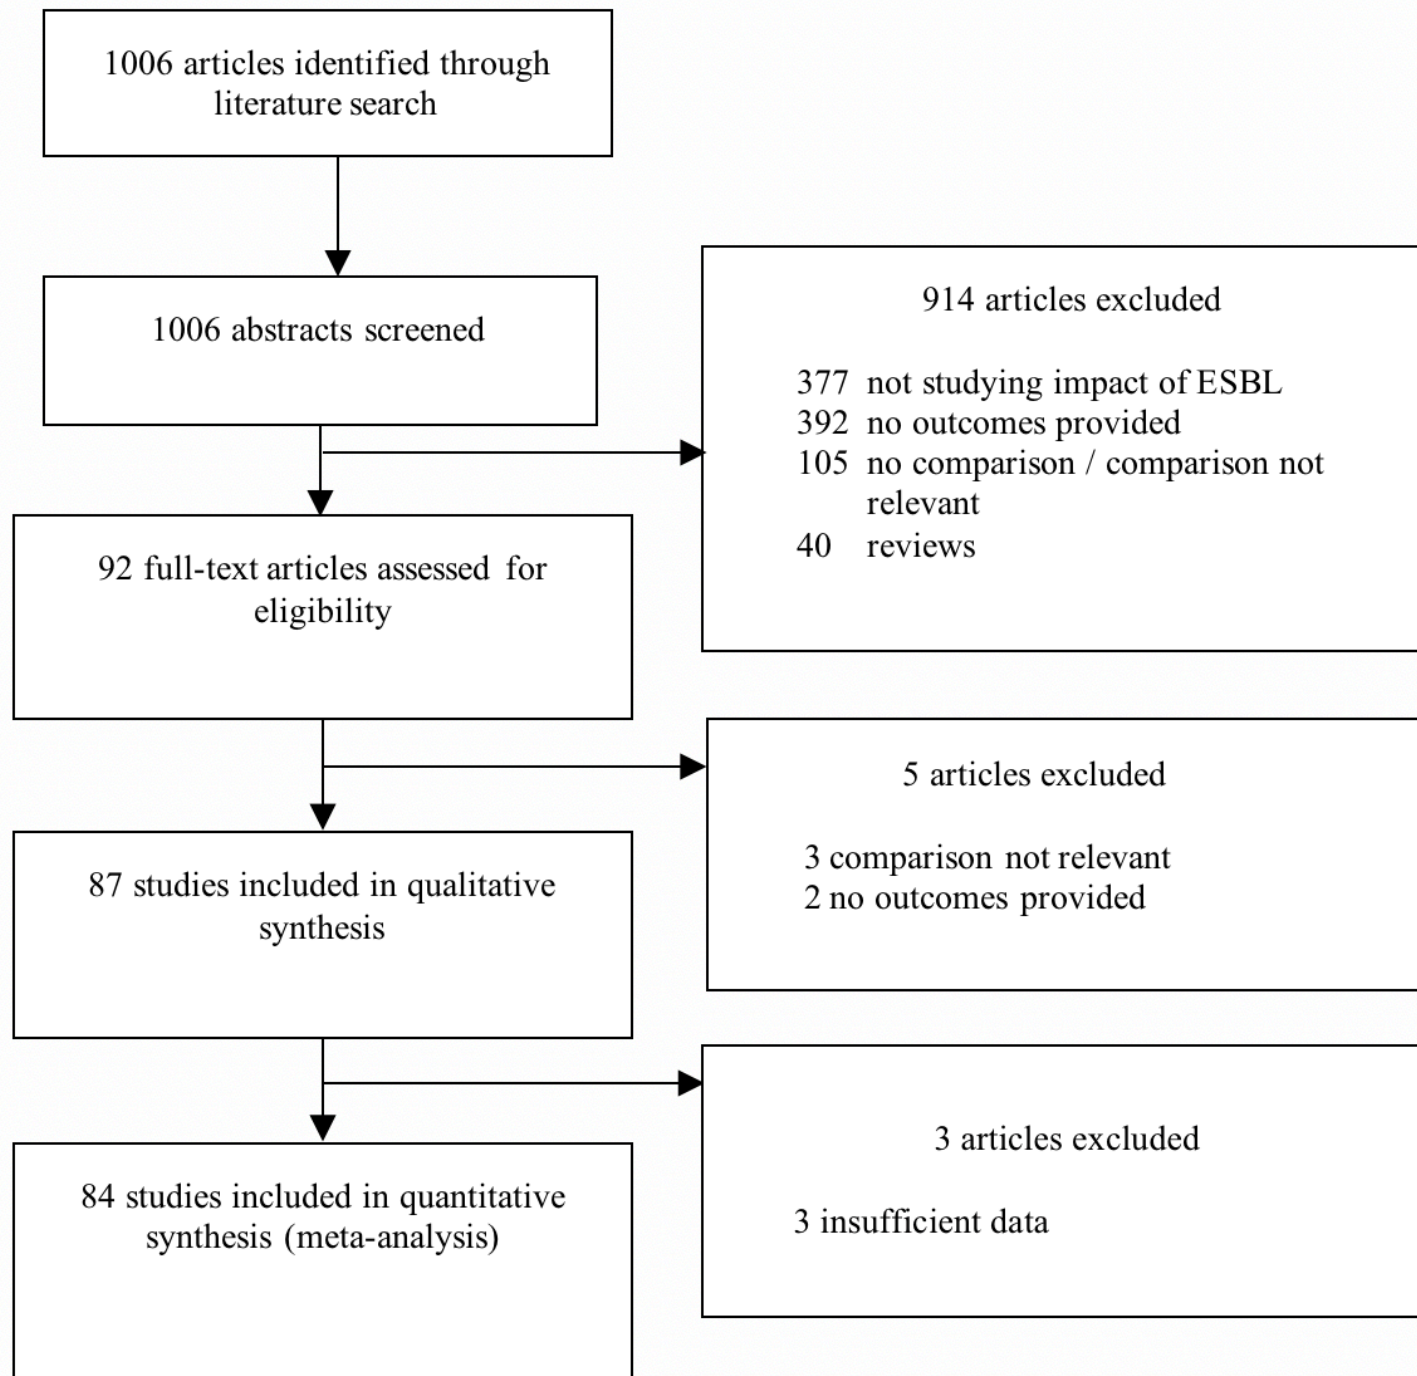

risk ratio (95% CI)

Category

N

**Overall**

Overall 56 1.70 (1.52, 1.90)

**Mortality time**

14 day mortality 5 1.77 (1.15, 2.72)

28 day mortality 22 1.63 (1.35, 1.97)

Time not defined 27 1.70 (1.47, 1.97)

**Income classification**

High income countries 41 1.76 (1.54, 2.00)

Low/middle income countries 15 1.56 (1.25, 1.96)

**Study population**

All kinds of patients 36 1.65 (1.43, 1.90)

Cancer patients 5 1.73 (1.16, 2.57)

Children 7 2.09 (1.62, 2.71)

Neonates 3 1.76 (1.27, 2.45)

**Appropriateness of therapy**

Reported 44 1.75 (1.54, 1.99)

Not reported 12 1.55 (1.26, 1.90)

0 .5 1 2 3 4

1  
2  
3  
4  
5  
6  
7  
8  
9  
10  
11  
12  
13  
14  
15  
16  
17  
18  
19  
20  
21  
22  
23  
24  
25  
26  
27  
28  
29  
30  
31  
32  
33  
34  
35  
36  
37  
38  
39  
40  
41  
42  
43  
44  
45  
46  
47  
48  
49  
50  
51  
52  
53  
54





**Supplementary figure 1: Funnel plot of risk ratios for all-cause mortality in patients with ESBL bloodstream infections compared to patients with non-ESBL bloodstream infections**

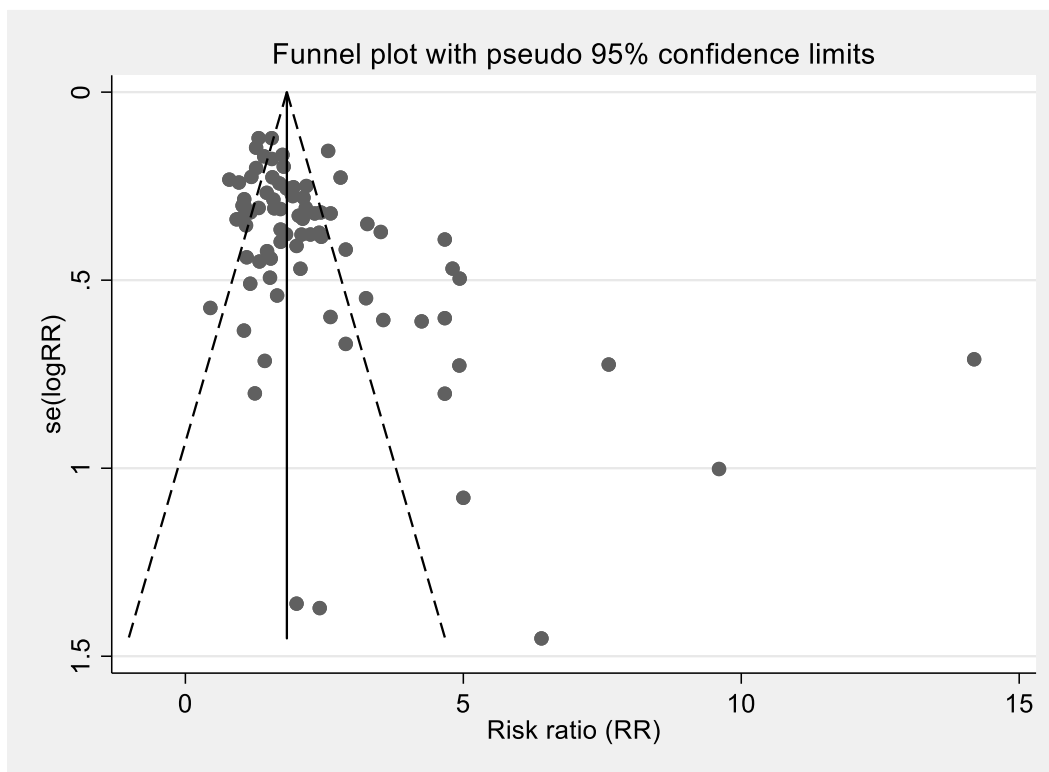

The y axis  $se(\log RR)$  is the standard error of the log risk ratio Pseudo 95% confidence limit refers to the 95% confidence limits around the summary treatment effect for each standard error on the vertical axis and to the expected distribution of studies in the absence of heterogeneity or of selection biases.

Supplementary figure 2: Funnel plot of weighted mean differences in the length of stay for patients with ESBL bloodstream infections compared to patients with non-ESBL bloodstream infections



The y axis  $se(WMD)$  is the standard error of the weighted mean difference. Pseudo 95% confidence limit refers to the 95% confidence limits around the summary treatment effect for each standard error on the vertical axis and to the expected distribution of studies in the absence of heterogeneity or of selection biases.

**Supplementary figure 3: Pooled risk ratios for all-cause mortality in patients with noninvasive ESBL infections compared to patients with noninvasive non-ESBL infections**



Only

**Supplementary figure 4: Pooled risk ratios for all-cause mortality in patients with ESBL bloodstream infections compared to patients with non-ESBL bloodstream infections—all subgroups**

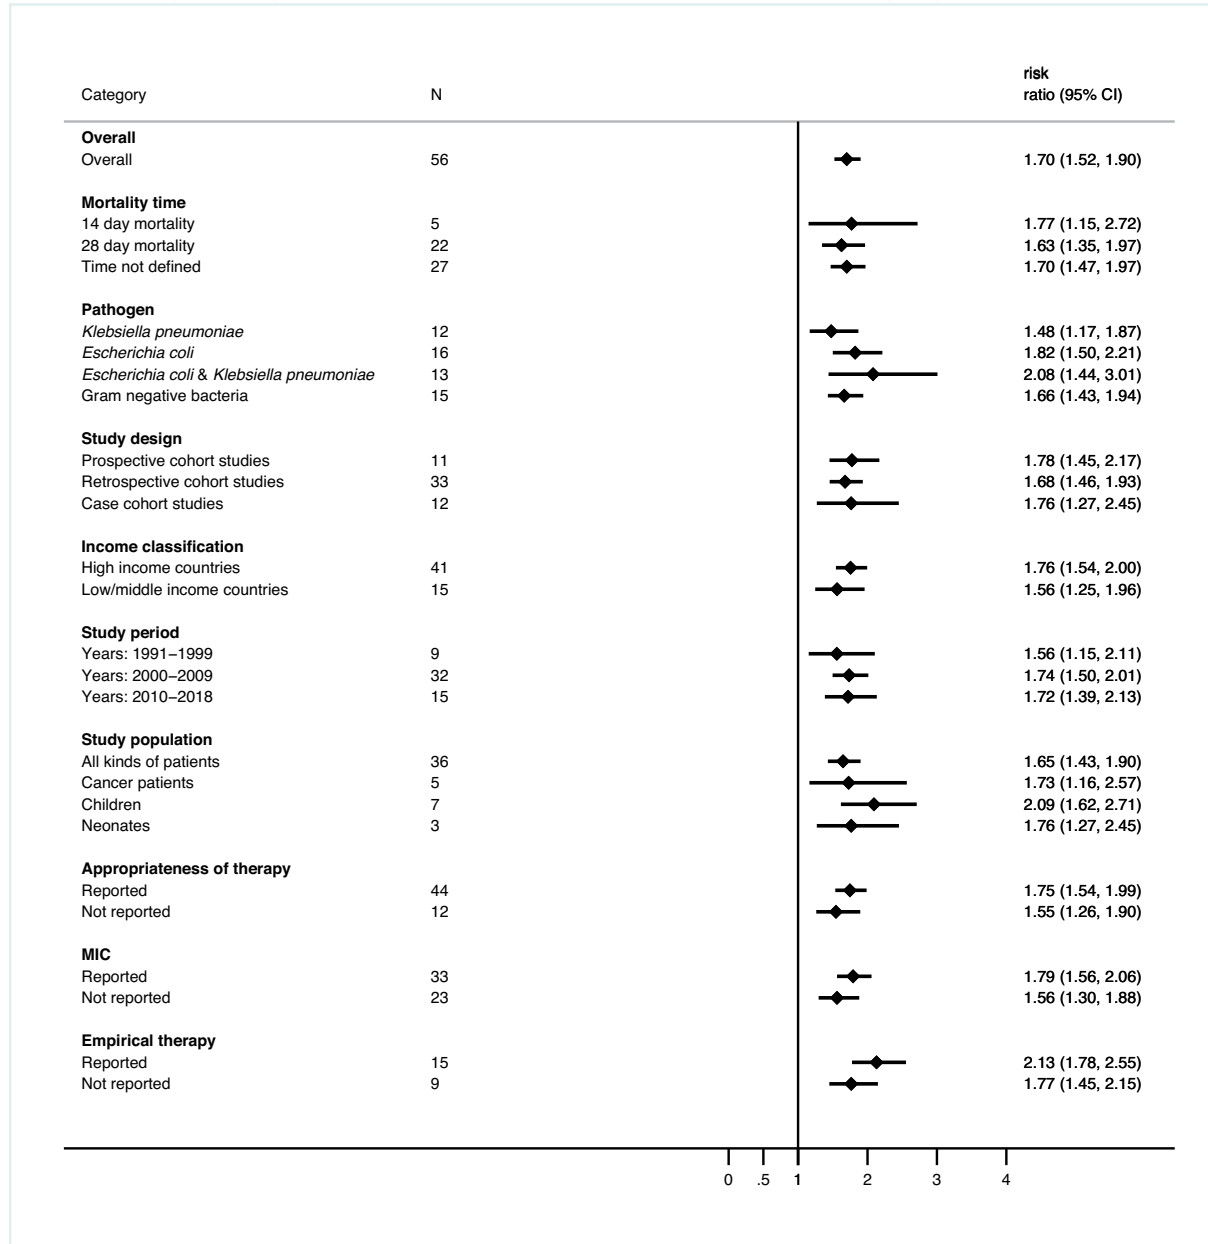



**Supplementary figure 5: Pooled risk ratios for all-cause mortality stratified by type of infection**



1  
2  
3  
4  
5  
6  
7  
8  
9  
10  
11  
12  
13  
14  
15  
16  
17  
18  
19  
20  
21  
22  
23  
24  
25  
26  
27  
28  
29  
30  
31  
32  
33  
34  
35  
36  
37  
38  
39  
40  
41  
42

1  
2  
3  
4  
5  
6  
7  
8  
9  
10  
11  
12  
13  
14  
15  
16  
17  
18  
19  
20  
21  
22  
23  
24  
25  
26  
27  
28  
29  
30  
31  
32  
33  
34  
35  
36  
37  
38  
39  
40  
41  
42

**Supplementary figure 6: Weighted mean differences in length of hospital stay stratified by type of infection**

N Weighted mean difference (95% CI)



**Supplementary figure 7: Weighted mean differences in length of hospital stay in patients with noninvasive ESBL infections compared to patients with noninvasive non-ESBL infections**

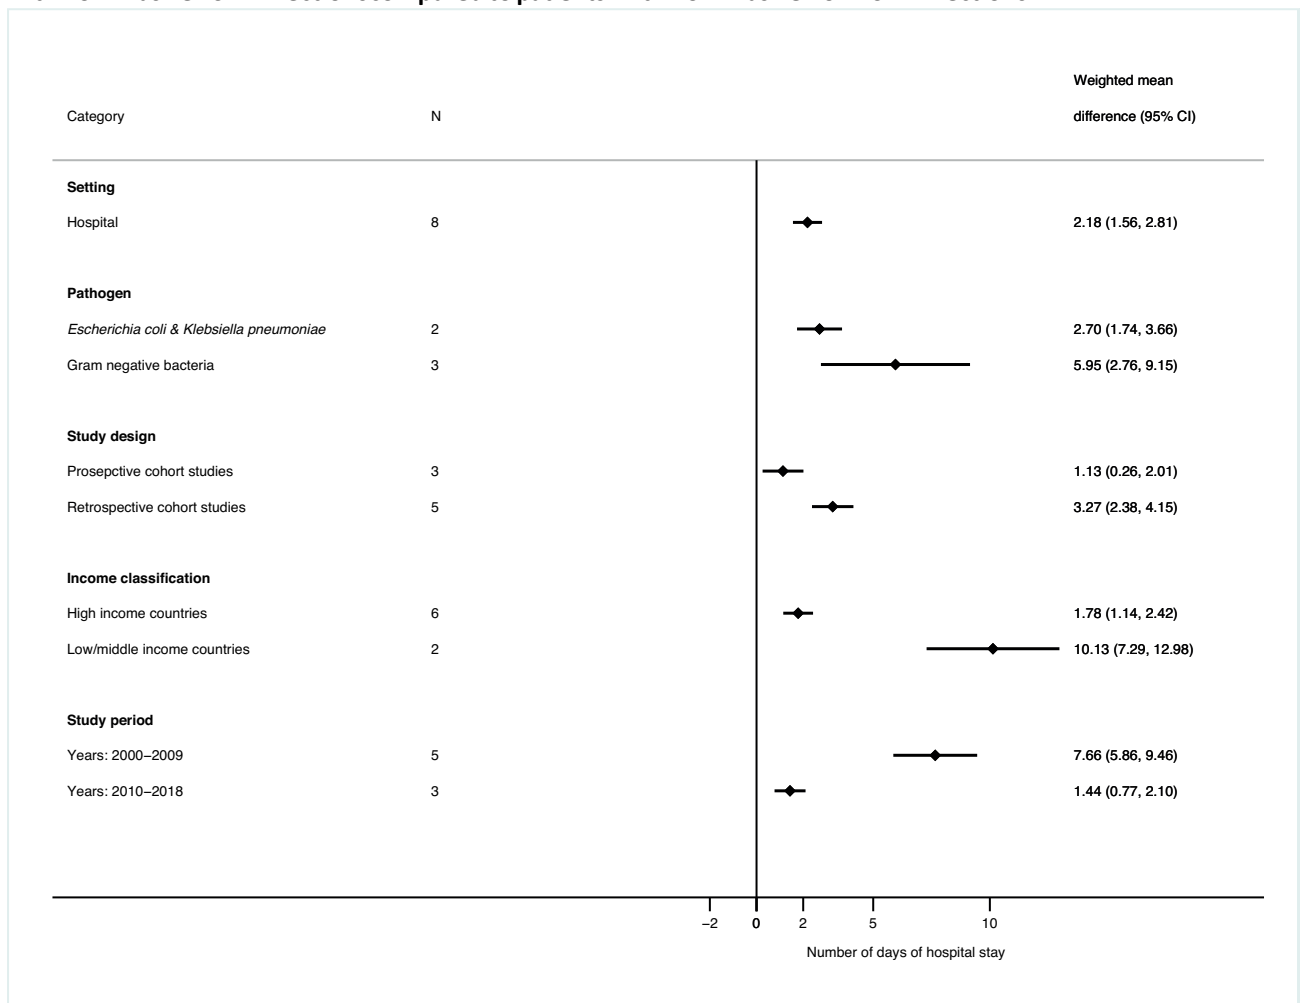

**Supplementary table S1: Search terms used in PubMed :**

((ESBL[tw] OR ""Extended spectrum beta-lactamase""[tw] OR ESBL[Mesh] OR ""Extended spectrum beta-lactamase"" [Mesh]) OR Extended spectrum ? lactamase[tw] OR Extended spectrum ? lactamase[Mesh] )

AND

(Escherichia Coli[Mesh] OR E.coli[Mesh] OR Escherichia Coli[tw] OR E.coli[tw]) ) OR (Klebsiella pneumoniae[Mesh] OR K.Pneumoniae[Mesh] OR Klebsiella pneumoniae[tw] OR K.Pneumoniae[tw])

**Coupled with**

(length of stay[mesh] OR (hospitalisation[tw] AND length[tw]) OR length of hospitalisation[tw] OR length of hospitalization[tw] OR duration of hospitalization[tw] duration of hospitalisation[tw] OR LOS[tw] OR ((period[tw] OR length[tw]) AND (hospital stay[tw] OR hospitalisation[tw] OR hospitalization[tw])) OR

(mortality[mesh] OR mortality[tw] OR death rate[tw] OR fatality[tw] OR survival rate[tw] OR death[tw] OR died[tw] OR dead[tw])) OR

(cost\*[Title/Abstract] OR "costs and cost analysis"[MeSH:noexp])

**Coupled with**

("0001/01/01"[PDat] : "2018/10/01"[PDat])

Supplementary table S2: Modified Newcastle Ottawa quality assessment scale for case-control studies and cohort studies.

| For case cohort studies, the quality criteria assessed are |                                                                            |     |                                                                                  |
|------------------------------------------------------------|----------------------------------------------------------------------------|-----|----------------------------------------------------------------------------------|
| 1                                                          | Is the case definition adequate?                                           | a*  | yes, with independent validation                                                 |
|                                                            |                                                                            | b   | yes, eg. record linkage or based on self-report                                  |
|                                                            |                                                                            | c   | no description                                                                   |
| 2                                                          | Representativeness of the cases                                            | a*  | consecutive or obviously representative series of cases                          |
|                                                            |                                                                            | b   | potential for selection biases or not stated                                     |
| 3                                                          | Selection of Controls                                                      | a*  | community controls                                                               |
|                                                            |                                                                            | b   | hospital controls                                                                |
|                                                            |                                                                            | c   | no description                                                                   |
| 4                                                          | Definition of Controls                                                     | a*  | no history of disease (endpoint)                                                 |
|                                                            |                                                                            | b   | no description of source                                                         |
| 5                                                          | Comparability of cases and controls on the basis of the design or analysis | a*  | study controls for at least one variable (including age, sex and comorbidities)  |
|                                                            |                                                                            | b** | study controls for more than one variable (including age, sex and comorbidities) |
| 6                                                          | Ascertainment of exposure                                                  | a*  | secure record (eg surgical records)                                              |
|                                                            |                                                                            | b   | structured interview blind to case/control status                                |
|                                                            |                                                                            | c   | interview not blinded to case/control status                                     |
|                                                            |                                                                            | d   | written self-report or medical record only                                       |
|                                                            |                                                                            | e   | no description                                                                   |
| 7                                                          | Same method of ascertainment for cases and controls                        | a*  | yes                                                                              |
|                                                            |                                                                            | b   | no                                                                               |
|                                                            |                                                                            | c   | unclear                                                                          |
| 8                                                          | Non-Response rate                                                          | a   | same rate for both groups                                                        |
|                                                            |                                                                            | b   | non respondents described                                                        |
|                                                            |                                                                            | c   | rate different and no designation                                                |
| For cohort studies, the quality criteria assessed are      |                                                                            |     |                                                                                  |
| 1                                                          | Representativeness of the exposed cohort                                   | a*  | truly representative                                                             |
|                                                            |                                                                            | b*  | somewhat representative                                                          |
|                                                            |                                                                            | c   | selected group of users                                                          |
|                                                            |                                                                            | d   | no description                                                                   |
| 2                                                          | Selection of the non-exposed cohort                                        | a*  | drawn from the same community as the exposed cohort                              |
|                                                            |                                                                            | b   | drawn from a different source                                                    |
|                                                            |                                                                            | c   | no description of the derivation of the non-exposed cohort                       |
| 3                                                          | Ascertainment of exposure                                                  | a*  | secure record (eg surgical records)                                              |
|                                                            |                                                                            | a*  | structured interview                                                             |
|                                                            |                                                                            | c   | written self-report                                                              |
|                                                            |                                                                            | d   | no description                                                                   |
| 4                                                          | Demonstration that outcome of interest was not present at start of study   | a*  | yes                                                                              |
|                                                            |                                                                            | b   | no                                                                               |
|                                                            |                                                                            | c   | unclear                                                                          |
| 5                                                          | Comparability of cohorts on the basis of the design or analysis            | a*  | study controls for age or comorbidities                                          |
|                                                            |                                                                            | b** | study controls for age and comorbidities                                         |
| 6                                                          | Assessment of outcome:                                                     | a*  | independent blind assessment                                                     |
|                                                            |                                                                            | b*  | record linkage                                                                   |
|                                                            |                                                                            | c   | self-report                                                                      |
|                                                            |                                                                            | d   | no description                                                                   |

|   |                                             |    |                                                                                                                                    |
|---|---------------------------------------------|----|------------------------------------------------------------------------------------------------------------------------------------|
| 7 | Follow-up long enough for outcomes to occur | a* | yes                                                                                                                                |
|   |                                             | b  | no                                                                                                                                 |
|   |                                             | c  | unclear                                                                                                                            |
| 8 | Adequacy of follow up of cohorts            | a* | complete follow up – all that matters subjects accounted for, subjects lost to follow up unlikely to introduce bias - small number |
|   |                                             | b* | inadequate numbers but description provided of those lost                                                                          |
|   |                                             | c  | inadequate follow up rate and no description of those lost                                                                         |
|   |                                             | d  | no statement                                                                                                                       |

Thresholds for converting the Newcastle-Ottawa scales to AHRQ standards (good, fair, and poor):

**Good quality:** 3 or 4 stars in selection domain AND 1 or 2 stars in comparability domain AND 2 or 3 stars in outcome/exposure domain

**Fair quality:** 2 stars in selection domain AND 1 or 2 stars in comparability domain AND 2 or 3 stars in outcome/exposure domain

**Poor quality:** 0 or 1 star in selection domain OR 0 stars in comparability domain OR 0 or 1 stars in outcome/exposure domain

EW Only

Supplementary table S3: Study characteristics overview

| Subgroup                                                                                                                  | All Studies | Bloodstream infections | Noninvasive infections |
|---------------------------------------------------------------------------------------------------------------------------|-------------|------------------------|------------------------|
|                                                                                                                           | <b>87</b>   | <b>57</b>              | <b>10</b>              |
| <b>Country</b>                                                                                                            |             |                        |                        |
| South Korea <sup>13,14,16,17,31,35,38,42,44,46,51,52,57,59</sup>                                                          | 14          | 9                      | 2                      |
| Thailand <sup>24,26,45,53-55,88</sup>                                                                                     | 7           | 3                      |                        |
| USA <sup>10,18,28,32,48,61,69</sup>                                                                                       | 7           | 2                      | 1                      |
| Spain <sup>36,40,58,62,70,91,93</sup>                                                                                     | 7           | 4                      | 2                      |
| Taiwan <sup>12,39,64,71,82,84,96</sup>                                                                                    | 7           | 5                      | 2                      |
| China <sup>60,73,74,76,86</sup>                                                                                           | 5           | 4                      |                        |
| Israel <sup>23,47,92,93</sup>                                                                                             | 4           | 3                      |                        |
| Germany <sup>10,40,43,63</sup>                                                                                            | 4           | 3                      |                        |
| Italy <sup>25,33,37</sup>                                                                                                 | 3           | 3                      |                        |
| Japan <sup>76,81,86</sup>                                                                                                 | 3           | 3                      |                        |
| Tanzania <sup>19,66,75</sup>                                                                                              | 3           | 3                      |                        |
| India <sup>49,50,80</sup>                                                                                                 | 3           | 1                      | 1                      |
| Canada <sup>65,67,85</sup>                                                                                                | 3           | 2                      |                        |
| UK <sup>22,30,89</sup>                                                                                                    | 3           | 3                      |                        |
| France <sup>68,79</sup>                                                                                                   | 2           | 1                      | 1                      |
| South Africa <sup>13,81</sup>                                                                                             | 2           | 1                      |                        |
| Brazil <sup>21,34</sup>                                                                                                   | 2           | 2                      |                        |
| Greece <sup>90</sup>                                                                                                      | 1           | 1                      |                        |
| Hungary <sup>95</sup>                                                                                                     | 1           | 1                      |                        |
| Lebanon <sup>27</sup>                                                                                                     | 1           | -                      |                        |
| Malaysia <sup>29</sup>                                                                                                    | 1           | -                      | 1                      |
| Mexico <sup>72</sup>                                                                                                      | 1           | 1                      |                        |
| Saudi Arabia <sup>20</sup>                                                                                                | 1           | 1                      |                        |
| Turkey <sup>78</sup>                                                                                                      | 1           | 1                      |                        |
|                                                                                                                           |             |                        |                        |
| <b>Continent</b>                                                                                                          |             |                        |                        |
| Asia <sup>12-14,16,17,20,23,24,25,27,29,31,35,38,39,42,44-47,49, 55,57,59,60,64,71,73,74,76,80-82,84,86-88,92,93,96</sup> | 46          | 29                     | 6                      |
| Europe <sup>11,22,25,30,33,35,37,40,41,43,58,62,63,68,70,78,79,89-91,94,95</sup>                                          | 22          | 17                     | 3                      |
| North America <sup>10,18,28,32,48,61,65,67,69,85</sup>                                                                    | 10          | 4                      | 1                      |
| Africa <sup>15,19,66,75,83</sup>                                                                                          | 5           | 4                      | -                      |
| South America <sup>21,34,72</sup>                                                                                         | 3           | 3                      | -                      |
| More than 1 continent <sup>56</sup>                                                                                       | 1           | -                      | -                      |

1  
2  
3  
4  
5  
6  
7  
8  
9  
10  
11  
12  
13  
14  
15  
16  
17  
18  
19  
20  
21  
22  
23  
24  
25  
26  
27  
28  
29  
30  
31  
32  
33  
34  
35  
36  
37  
38  
39  
40  
41  
42  
43  
44  
45  
46

|                                                                                                                                 |    |    |   |
|---------------------------------------------------------------------------------------------------------------------------------|----|----|---|
| <b>Income group</b>                                                                                                             |    |    |   |
| High-income countries <sup>10-14,16-18,20,22,23,25,28,30-33,35-44,46-48,51,52,57-59,61-65,67-71,76,79,81,82,84-86,89-96,</sup>  | 60 | 41 | 8 |
| Low- and middle-income countries <sup>15,19,21,23,25,27,29,34,45,50,53-55,60,66,72-75,77,78,80,83,87,88</sup>                   | 26 | 16 | 2 |
| High-income countries AND Low- and middle-income countries <sup>56</sup>                                                        | 1  | -  | - |
| <b>Study design</b>                                                                                                             |    |    |   |
| Case cohort study <sup>10,12,24-28,31,40,44,46,55,58,61,63-65,67-69,85-87</sup>                                                 | 24 | 14 |   |
| Retrospective cohort study <sup>11,13-17,20,21,23,29,33-38,41-43,45,47,48,50-54,59,60,71,73,74,76-78,81-84,88,89,93,95,96</sup> | 44 | 32 |   |
| Prospective cohort study <sup>18,19,30,32,39,49,56,62,66,70,72,75,79,80,90-92,94</sup>                                          | 18 | 11 |   |
| <b>Year group</b>                                                                                                               |    |    |   |
| 1991-1999 <sup>10,60,15,16,17,62,21,25,28,36,46,93,94</sup>                                                                     | 13 | 10 | - |
| 2000-2009 <sup>11-14,18-20,22-24,26,27,29-35,37-45,47,49-52,54,55,57,58,61,63,64,67-69,89-92,95,96</sup>                        | 49 | 31 | 6 |
| 2010-2018 <sup>48,53,54,59,65,66,70-88</sup>                                                                                    | 25 | 16 | 4 |
| <b>Pathogen</b>                                                                                                                 |    |    |   |
| <i>Escherichia coli</i> <sup>11,24,30,33,35-37,40,43,45,52,55,58,59,68,70,71,73,76,86,87,91,94</sup>                            | 23 | 16 | 3 |
| <i>Klebsiella pneumoniae</i> <sup>15,16,20,21,25,29,32,34,41,43,47,61,62,74,78,83,95,96</sup>                                   | 17 | 11 | 1 |
| <i>E. coli</i> and <i>K. pneumoniae</i> <sup>10,13,14,17,26,28,38,43,44,46,48,50,51,54,57,60,63,69,85,88,89</sup>               | 20 | 13 | 2 |
| Gram-negative bacteria <sup>12,18,19,22,23,27,31,39,42,49,53,56,64-67,72,75,77,79-82,84,90,92,93</sup>                          | 27 | 17 | 4 |
| <b>Study setting</b>                                                                                                            |    |    |   |
| Entire hospital <sup>10,11,16,18,20-27,29,30,33-38,40-46,48-50,52-55,58-60,62,65-69,73,74,76,82,85,86,90-96</sup>               | 57 | 40 | 7 |
| Intensive care unit <sup>32,61,64,75,79-81,88,89</sup>                                                                          | 9  | 5  | 1 |
| Pediatric ward <sup>17,19,28,51,57,78,83,88</sup>                                                                               | 8  | 7  | - |
| Neonatal ward <sup>15,61,64,71,75</sup>                                                                                         | 5  | 3  | - |
| Neonatal intensive care unit <sup>61,64,75</sup>                                                                                | 3  | 2  | - |
| Medical ward <sup>13,39,70</sup>                                                                                                | 3  | -  | 2 |
| Not provided <sup>31,47</sup>                                                                                                   | 2  | -  | - |
| Emergency Department <sup>12,84</sup>                                                                                           | 2  | 2  | - |
| Surgical ward <sup>32,56</sup>                                                                                                  | 2  | -  | - |
| Burn unit <sup>32</sup>                                                                                                         | 1  | -  | - |
| Oncology <sup>72</sup>                                                                                                          | 1  | 1  | - |
| Referral centre for hepatopancreaticobiliary diseases <sup>77</sup>                                                             | 1  | -  | - |
| Hematological <sup>14</sup>                                                                                                     | 1  | 1  | - |



|                                                                                                                                                                 |    |    |   |
|-----------------------------------------------------------------------------------------------------------------------------------------------------------------|----|----|---|
| <b>Study population</b>                                                                                                                                         |    |    |   |
| All kinds of patients <sup>10-13,14,18,20-27,29,30,34,35,39-41,43-46,48-50,52-56,58,60,62,63,65-69,76,82,84-86,90,92-95</sup>                                   | 55 | 36 | 7 |
| Intensive care unit patients <sup>32,79-81,87,89</sup>                                                                                                          | 6  | 3  | 1 |
| Children <sup>17,19,28,51,57,78,83,88</sup>                                                                                                                     | 8  | 7  | - |
| Neonates <sup>15,61,64,71,75</sup>                                                                                                                              | 5  | 3  | - |
| Cancer patients <sup>33,51,59,72,91</sup>                                                                                                                       | 5  | 5  | - |
| Immunocompromised patients <sup>51</sup>                                                                                                                        | 1  | 1  | - |
| Diabetic patients <sup>96</sup>                                                                                                                                 | 1  | 1  | - |
| Elderly patients <sup>70</sup>                                                                                                                                  | 1  | -  | 1 |
| Patients with chemotherapy/stem cell transplantation <sup>14,91</sup>                                                                                           | 2  | 2  | - |
| Patients after prostatitis biopsy <sup>42</sup>                                                                                                                 | 1  | -  | 1 |
| Lungs transplantation patients <sup>47</sup>                                                                                                                    | 1  | -  | - |
| Hematological patients <sup>73</sup>                                                                                                                            | 1  | 1  | - |
| All except cardiothoracic therapy, transplant surgery, burns <sup>74</sup>                                                                                      | 1  | 1  |   |
| Patients with pyogenic liver abscess <sup>77</sup>                                                                                                              | 1  | -  | - |
|                                                                                                                                                                 |    |    |   |
| <b>Data reported</b>                                                                                                                                            |    |    |   |
| Treatment information <sup>10,12-13,23-25,30-38,40,44-49,51,52,54-65,67,68,70-96</sup>                                                                          | 74 | 50 | 6 |
| Appropriateness of treatment <sup>10,12-14,16,17,19-21,23-26,30-38,40,44-46,48,49,51,52,54-56,58-60,62-65,67,68,70,72-74,76,77,79,81,83-86,89-96</sup>          | 62 | 45 | 5 |
| Empirical therapy <sup>14,16,17,24,25,33,35-38,40,44,51,52,56,58,59,63,76,81,83,94</sup>                                                                        | 22 | 16 | 2 |
| Treatment outcome <sup>10,12-21,25,26,30-38,40,44-49,51,52,54-57,59-65,67,68,72-74,76,78-81,83-86,88-92,94-96</sup>                                             | 64 | 45 | 3 |
| Minimum inhibitory concentration results <sup>10,11,13,14,16-19,22-25,27,28,32,33,35-41,43,44,47,50-52,54-59,62,63,66,68,69,76-78,80,81,83,85-87,89,94,95</sup> | 52 | 34 | 4 |
| AmpC genotyping <sup>10,11,17,32,41,46,50,56,57,65,66,70,86</sup>                                                                                               | 13 | 6  | 2 |

Supplementary table S4: Characteristics for each study

|                                  | Years     | Country                                               | Study design                | Control group      | Study population                                                                          | Setting                    | Outcome definition           | Main objective                                                                                                                                                                                                       | Pathogen |
|----------------------------------|-----------|-------------------------------------------------------|-----------------------------|--------------------|-------------------------------------------------------------------------------------------|----------------------------|------------------------------|----------------------------------------------------------------------------------------------------------------------------------------------------------------------------------------------------------------------|----------|
| Lautenbach E <sup>10</sup>       | 1997-1998 | USA                                                   | Case cohort study           | Non-ESBL-infection | All kinds of patients                                                                     | Entire hospital            | Attributable mortality; LOS  | Risk factors for infection with ESBL-producing pathogens, difference in clinical outcomes of infections: resistant vs. susceptible organisms                                                                         | EC, KP   |
| Kim SH <sup>14</sup>             | 2007-2008 | South Korea                                           | Cohort study, Retrospective | Non-ESBL-infection | Patients who received either chemotherapy or stem cell transplantation; neutropenic fever | Hematological ward, Others | All-cause mortality (28 day) | Risk factors for acquisition of ESBL, appropriateness of empirical antimicrobial therapy, clinical outcomes in relation to ESBL production                                                                           | EC, KP   |
| Chayakulkeere M <sup>53</sup>    | 2015-2015 | Thailand                                              | Cohort study, Retrospective | Non-ESBL-infection | All kinds of patients                                                                     | Entire hospital            | All-cause mortality          | Prevalence & risk factors for infections with & antibiotic susceptibility patterns of & outcomes of patients infected with ESBL-producing-GNB                                                                        | GNB      |
| Pisarntharak A <sup>54</sup>     | 2003-2007 | Thailand                                              | Cohort study, Retrospective | Non-ESBL-infection | All kinds of patients                                                                     | Entire hospital            | All-cause mortality, LOS     | Predictors for mortality associated with community-onset BSI with ESBL-producing pathogens, initial empirical antimicrobial regimens, associated hospital resource utilisation, costs accrued after diagnosis of BSI | EC, KP   |
| Pisarntharak A <sup>55</sup>     | 2003-2004 | Thailand                                              | Case cohort study           | Non-ESBL-infection | All kinds of patients                                                                     | Entire hospital            | All-cause mortality, LOS     | Mortality associated with community-onset infection due to ESBL-producing pathogens, associated hospital resource use, post-infection hospital cost                                                                  | EC       |
| Jean SS <sup>56</sup>            | 2010-2011 | Portugal, Columbia, the Philippines, Taiwan, Thailand | Cohort study, prospective   | Non-ESBL-infection | All kinds of patients                                                                     | Surgical ward              | Attributable mortality, LOS  | Clinical impact on hospitalised patients with community-acquired complicated intra-abdominal infection: ESBL-producing- vs. non-ESBL-producing pathogens                                                             | GNB      |
| Lee J <sup>57</sup>              | 1999-2005 | South Korea                                           | interventional studies      | Non-ESBL-infection | Children                                                                                  | Pediatric ward             | All-cause mortality (28 day) | impact of a change in antibiotic policy on ESBL-prevalence                                                                                                                                                           | EC, KP   |
| Briongos-Figuero A <sup>58</sup> | 2009-2010 | Spain                                                 | Case cohort study           | Non-ESBL-infection | All kinds of patients                                                                     | Entire hospital            | All-cause mortality          | Characteristics & associated risk factors for EBSL-enterobacteria-UTIs                                                                                                                                               | EC       |
| Ha YE <sup>59</sup>              | 2010-2012 | South Korea                                           | Cohort study, retrospective | Non-ESBL-infection | Patients with cancer                                                                      | Entire hospital            | All-cause mortality (28 day) | Clinical & molecular epidemiology of ESBL-EC bacteraemia, clinical impact of ESBLs on patient outcome                                                                                                                | EC       |
| Du B <sup>60</sup>               | 1997-1999 | China                                                 | Cohort study, retrospective | Non-ESBL-infection | All kinds of patients                                                                     | Entire hospital            | All-cause mortality          | Risk factors for nosocomial ESBL-EC- and ESBL-KP- bacteraemia & influence on patient outcome.                                                                                                                        | EC, KP   |

1  
2  
3  
4  
5  
6  
7  
8  
9  
10  
11  
12  
13  
14  
15  
16  
17  
18  
19  
20  
21  
22  
23  
24  
25  
26  
27  
28  
29  
30  
31  
32  
33  
34  
35  
36  
37  
38  
39  
40  
41  
42  
43  
44  
45  
46

|                              | Years     | Country      | Study design                | Control group                                                                      | Study population      | Setting         | Outcome definition                               | Main objective                                                                                                                                                                                                                                                                                                                                                                                                                                                                                                    | Pathogen |
|------------------------------|-----------|--------------|-----------------------------|------------------------------------------------------------------------------------|-----------------------|-----------------|--------------------------------------------------|-------------------------------------------------------------------------------------------------------------------------------------------------------------------------------------------------------------------------------------------------------------------------------------------------------------------------------------------------------------------------------------------------------------------------------------------------------------------------------------------------------------------|----------|
| Stone PW <sup>61</sup>       | 2001      | USA          | Case cohort study           | Non-ESBL-infection                                                                 | Neonates at NICU      | NICU            | LOS                                              | costs of interventions aimed at controlling the outbreak, attributable length of stay associated with infection and colonisation with ESBL-KP                                                                                                                                                                                                                                                                                                                                                                     | KP       |
| Pillay T <sup>15</sup>       | 1995-1996 | South Africa | Cohort study, retrospective | Non-ESBL-infection                                                                 | Neonates              | Neonatal ward   | All-cause mortality                              | Use of piperacillin/tazobactam in treatment of KP- infection                                                                                                                                                                                                                                                                                                                                                                                                                                                      | KP       |
| Kim BN <sup>16</sup>         | 1999-2000 | South Korea  | Cohort study, retrospective | Non-ESBL-infection                                                                 | All kinds of patients | Entire hospital | Attributable mortality, LOS                      | Prevalence & clinical characteristics of ESBL-KP- bacteraemia, impact of ESBL- production on outcome of patients with KP- bacteraemia in endemic situation.                                                                                                                                                                                                                                                                                                                                                       | KP       |
| Kim YK <sup>17</sup>         | 1993-1998 | South Korea  | Cohort study, retrospective | Non-ESBL-infection                                                                 | Children              | Pediatric ward  | All-cause mortality                              | Risk factors & clinical outcomes & clinical responses to treatment of ESBL-EC- and ESBL-KP-bacteraemia, prevalence and types of their ESBLs                                                                                                                                                                                                                                                                                                                                                                       | EC, KP   |
| Bhavnani SM <sup>18</sup>    | 2001-2002 | USA          | Cohort study, prospective   | Non-ESBL-infection                                                                 | All kinds of patients | Entire hospital | Attributable mortality, all-cause mortality      | Risk factors for occurrence of invasive ESBL-EC- and ESBL-KP-infections, factors associated with clinical outcome, drug regimens for treatment of infections associated ESBL/non-ESBL strains in real-life clinical practice, clinical response rates for patients treated with cephalosporins/other classes of antimicrobial agents, /carbapenems, clinical response for those patients with infection associated with ESBL and non-ESBL-producing strains with MIC values V8 Ag/mL treated with cephalosporins. | GNB      |
| Blomberg B <sup>19</sup>     | 2001-2002 | Tanzania     | Cohort study, prospective   | Non-ESBL-infection                                                                 | Neonates, children    | Pediatric ward  | All-cause mortality                              | Prevalence & clinical implications of ESBL production in EC-,KP-, Salmonellae- septicemia                                                                                                                                                                                                                                                                                                                                                                                                                         | GNB      |
| Pená C <sup>62</sup>         | 1993-1995 | Spain        | Cohort study, prospective   | Non-ESBL-infection                                                                 | All kinds of patients | Entire hospital | Attributable mortality, all-cause mortality      | Clinical epidemiology& outcome of ESBL-KP- bacteraemia, relevance of ESBL strains in mortality of patients with hospital-acquired KP-BSI.                                                                                                                                                                                                                                                                                                                                                                         | KP       |
| Kola A <sup>63</sup>         | 2002-2004 | Germany      | Case cohort study           | Non-ESBL-infection                                                                 | All kinds of patients | Entire hospital | All-cause mortality, LOS, ICU-LOS                | Outcomes of ESBL-EC- and ESBL-KP-infections                                                                                                                                                                                                                                                                                                                                                                                                                                                                       | EC, KP   |
| Isai MH <sup>64</sup>        | 2001-2012 | Taiwan       | Case cohort study           | Control group: non-ESBL-infection, second control group: all hospitalised patients | Neonates at NICU      | NICU            | Attributable mortality, all-cause mortality, LOS | Clinical features& risk factors& molecular epidemiology of ESBL-GNB                                                                                                                                                                                                                                                                                                                                                                                                                                               | GNB      |
| Maslikowska JA <sup>65</sup> | 2010-2013 | Canada       | Case cohort study           | Non-ESBL-infection                                                                 | All kinds of patients | Entire hospital | Attributable mortality, all-cause mortality, LOS | Differences in clinical & microbiological outcome, mortality, and/or hospital resource use: ESBL-EC- and ESBL-Ks- vs non-ESBL-EC- and non-ESBL-Ks-infections                                                                                                                                                                                                                                                                                                                                                      | GNB      |

1  
2  
3  
4  
5  
6  
7  
8  
9  
10  
11  
12  
13  
14  
15  
16  
17  
18  
19  
20  
21  
22  
23  
24  
25  
26  
27  
28  
29  
30  
31  
32  
33  
34  
35  
36  
37  
38  
39  
40  
41  
42  
43  
44  
45  
46

|                                 | Years     | Country                 | Study design                | Control group                                                            | Study population      | Setting          | Outcome definition                                        | Main objective                                                                                                                                                                                     | Pathogen |
|---------------------------------|-----------|-------------------------|-----------------------------|--------------------------------------------------------------------------|-----------------------|------------------|-----------------------------------------------------------|----------------------------------------------------------------------------------------------------------------------------------------------------------------------------------------------------|----------|
| Onken A <sup>66</sup>           | 2012-2013 | Tanzania                | Cohort study, prospective   | Non-ESBL-infection                                                       | All kinds of patients | Entire hospital  | All-cause mortality                                       | Most common bacterial pathogens causing BSI, antimicrobial susceptibility                                                                                                                          | GNB      |
| Nguyen ML <sup>67</sup>         | 2005-2010 | Canada                  | Case cohort study           | Non-ESBL-infection                                                       | All kinds of patients | Entire hospital  | All-cause mortality, LOS, ICU-LOS                         | Risk factors for & patient outcomes associated with ESBL-EC- and ESBL-Ks- bacteraemia, appropriateness of empiric antibiotic therapy & effect of inappropriate empiric therapy on outcomes         | GNB      |
| Denis B <sup>68</sup>           | 2005-2009 | France                  | Case-control study          | Non-ESBL-infection                                                       | All kinds of patients | Entire hospital  | All-cause mortality (28 day), LOS                         | Prevalence & risk factors for ESBL-EC bacteraemia, impact on length of stay & 30day mortality                                                                                                      | EC       |
| Chopra T <sup>69</sup>          | 2004-2009 | USA                     | Case cohort study           | Case 2(Control1): non-ESBL-infection, second control group: no infection | All kinds of patients | Entire hospital  | All-cause mortality (28 day)                              | Predictors of ESBL-EC- and ESBL-KP-BSI, focus on cefepime exposure.                                                                                                                                | EC, KP   |
| Panhotra BR <sup>20</sup>       | 2001-2003 | Kingdom of Saudi Arabia | Case cohort study           | Non-ESBL-infection                                                       | All kinds of patients | Entire hospital  | All-cause mortality                                       | Risk factors & clinical outcome of ESBL-KP-bacteraemia (hospital acquired)                                                                                                                         | KP       |
| Marra AR <sup>21</sup>          | 1996-2001 | Brazil                  | Cohort study, retrospective | Non-ESBL-infection                                                       | All kinds of patients | Entire hospital  | All-cause mortality (14 day)                              | ESBL-KP- associated mortality                                                                                                                                                                      | KP       |
| Skippen I <sup>22</sup>         | 2003-2005 | UK                      | Case cohort study           | Non-ESBL-infection                                                       | All kinds of patients | Entire hospital  | All-cause mortality                                       | Risk factors for & outcomes of ESBL-EC- and ESBL-KP-invasive transmission of organism in the healthcare setting                                                                                    | GNB      |
| Schwaber MJ <sup>23</sup>       | 2000-2003 | Israel                  | Cohort study, retrospective | Non-ESBL-infection                                                       | All kinds of patients | Entire hospital  | Attributable mortality, all-cause mortality               | Outcomes of ESBL-production in Enterobacteriaceae-bacteraemia.                                                                                                                                     | GNB      |
| Apisarnthanarak A <sup>24</sup> | 2003-2004 | Thailand                | Case cohort study           | Control group: non-ESBL-infection, second control group: no infection    | All adult patients    | Entire hospital  | All-cause mortality, LOS                                  | Clinical & molecular epidemiologic factors associated with community onset ESBL-EC- infections, hospital resource utilisation, estimate costs associated with medical care (hospitalised patients) | EC       |
| Umbarello M <sup>25</sup>       | 1999-2003 | Italy                   | Case cohort study           | Non-ESBL-infection                                                       | All kinds of patients | Entire hospital  | Attributable mortality, all-cause mortality, LOS, ICU-LOS | Factors associated with isolation of ESBL- KP-strains                                                                                                                                              | KP       |
| Teistner R <sup>11</sup>        | 2008-2010 | Germany                 | Cohort study, retrospective | Non-ESBL-infection                                                       | All kinds of patients | Entire hospital, | All-cause mortality, LOS                                  | Difference in mortality: ESBL-EC-BSIs vs. non-ESBL-EC-BSIs, molecular epidemiology of ESBL-positive isolates                                                                                       | EC       |

1

2

3

4

5

6

7

8

9

10

11

12

13

14

15

16

17

18

19

20

21

22

23

24

25

26

27

28

29

30

31

32

33

34

35

36

37

38

39

40

41

42

43

44

45

46

|                               | Years     | Country     | Study design                | Control group                                                         | Study population                                | Setting                       | Outcome definition                | Main objective                                                                                                                                                                                                                                                            | Pathogen |
|-------------------------------|-----------|-------------|-----------------------------|-----------------------------------------------------------------------|-------------------------------------------------|-------------------------------|-----------------------------------|---------------------------------------------------------------------------------------------------------------------------------------------------------------------------------------------------------------------------------------------------------------------------|----------|
| Apisarntharak A <sup>26</sup> | 2003-2004 | Thailand    | Case cohort study           | Control group: non-ESBL-infection, second control group: no infection | All kinds of patients                           | Entire hospital               | All-cause mortality, LOS          | Risk factors for & outcomes of ESBL-EC- and ESBL-KP-infections (healthcare associated)                                                                                                                                                                                    | EC, KP   |
| Kanafani ZA <sup>27</sup>     | 2003      | Lebanon     | Case cohort study           | Non-ESBL-infection                                                    | All kinds of patients                           | Entire hospital               | All-cause mortality, LOS          | Epidemiology of infections with ESBL-EC and ESBL-Ks at AUBMC risk factors & outcomes of infections - focus on effect of prior antibiotic administration & the risks imparted by specific classes of antimicrobial agents                                                  | GNB      |
| Zaoutis TE <sup>28</sup>      | 1999-2003 | USA         | Case cohort study           | Non-ESBL-infection                                                    | Children                                        | Entire hospital               | All-cause mortality, LOS          | Risk factors & outcomes associated with ESBL-EC-and ESBL-KP-BSI                                                                                                                                                                                                           | EC, KP   |
| Goh LC <sup>29</sup>          | 2003-2004 | Malaysia    | Cohort study, retrospective | Non-ESBL-infection                                                    | All kinds of patients                           | Entire hospital               | All-cause mortality, LOS          | Impact of ESBL-KP-respiratory tract infections on hospital mortality, requirement for mechanical ventilation & length stay                                                                                                                                                | KP       |
| Melzer M <sup>30</sup>        | 2003-2005 | UK          | Cohort study, prospective   | Non-ESBL-infection                                                    | All kinds of patients                           | Entire hospital               | All-cause mortality               | Differences in mortality & length of hospital stay & time from bacteraemia to death in patients with ESBL-EC- vs. non-ESBL-EC-bacteremic-infection                                                                                                                        | EC       |
| Song KH <sup>31</sup>         | 2000-2006 | South Korea | Case cohort study           | Non-ESBL-infection                                                    | Patients with spontaneous bacterial peritonitis | Not provided                  | All-cause mortality (28 day)      | Outcomes of ESBL-EC-and ESBL-Ks- vs non-ESBL-EC-and ESBL-Ks-SBP (based on isolation from ascites), impact of ineffective initial antimicrobial therapy on outcome in patients with ESBL-EC- and ESBL-Ks-SBP, risk factors for infection by ESBL-producing microorganisms. | GNB      |
| Bennett JW <sup>32</sup>      | 2004-2008 | USA         | Cohort study, prospective   | Non-ESBL-infection                                                    | ICU-patients                                    | ICU, Surgical ward, Burn unit | All-cause mortality (28 day)      | ESBL types and strain variability, presence of host factors to determine potential role in morbidity and mortality during ESBL-KP-infections                                                                                                                              | KP       |
| Recarichi EM <sup>33</sup>    | 2000-2007 | Italy       | Cohort study, retrospective | Non-ESBL-infection                                                    | Patients with hematological malignancies        | Entire hospital               | All-cause mortality (28 day)      | Risk factors for mortality in patients suffering from hematological malignancies with concurrent EC-bacteraemia. Focus on impact of ESBL- production & fluoroquinolone resistance by bacterial isolates                                                                   | EC       |
| Fuon FF <sup>34</sup>         | 2006-2009 | Brazil      | Cohort study, retrospective | Non-ESBL-infection                                                    | All kinds of patients                           | Entire hospital               | All-cause mortality (28 day), LOS | Risk factors & mortality rate in ESBL-KP-bacteraemia                                                                                                                                                                                                                      | KP       |
| Kang CI <sup>35</sup>         | 2008-2009 | South Korea | Cohort study, retrospective | Non-ESBL-infection                                                    | All kinds of patients                           | Entire hospital               | All-cause mortality (28 day)      | Risk factors of ESBL-EC among community-onset bacteraemia, treatment outcomes                                                                                                                                                                                             | EC       |

1  
2  
3  
4  
5  
6  
7  
8  
9  
10  
11  
12  
13  
14  
15  
16  
17  
18  
19  
20  
21  
22  
23  
24  
25  
26  
27  
28  
29  
30  
31  
32  
33  
34  
35  
36  
37  
38  
39  
40  
41  
42  
43  
44  
45  
46

|                                | Years     | Country     | Study design                | Control group      | Study population                  | Setting                                           | Outcome definition                                                 | Main objective                                                                                                                                                                                                          | Pathogen |
|--------------------------------|-----------|-------------|-----------------------------|--------------------|-----------------------------------|---------------------------------------------------|--------------------------------------------------------------------|-------------------------------------------------------------------------------------------------------------------------------------------------------------------------------------------------------------------------|----------|
| Pena C <sup>36</sup>           | 1996-2003 | Spain       | Cohort study, retrospective | Non-ESBL-infection | All kinds of patients             | Entire hospital                                   | All-cause mortality (28 day)                                       | Risk factors for mortality among patients with EC- infections                                                                                                                                                           | EC       |
| Tumbarello M <sup>37</sup>     | 2006      | Italy       | Cohort study, retrospective | Non-ESBL-infection | All kinds of patients             | ICU, Medical ward, Entire hospital, surgical wide | All-cause mortality (21 day), LOS                                  | Clinical & economic impacts of ESBL production, inadequate Initial Antibiotic Therapy of EC-BSI                                                                                                                         | EC       |
| Kang C <sup>38</sup>           | 2006-2009 | South Korea | Case cohort study           | Non-ESBL-infection | All kinds of patients             | Entire hospital                                   | Attributable mortality, all-cause mortality (28 day)               | Impact of ESBL-producing bacteraemia on outcome in patients with hematologic malignancy.                                                                                                                                | EC, KP   |
| Wu YH <sup>39</sup>            | 2009-2012 | Taiwan      | Cohort study, prospective   | Non-ESBL-infection | All kinds of patients             | Medical ward                                      | LOS                                                                | Host-related risk factors for community-onset UTI due to levofloxacin- or cefazolin-nonsusceptible isolates or uropathogens with ESBL production, clinical impact of UTIs due to antimicrobial-nonsusceptible pathogens | GNB      |
| Rodriguez-Bano J <sup>40</sup> | 2004-2006 | Spain       | Case cohort study           | Non-ESBL-infection | All kinds of patients             | Entire hospital                                   | All-cause mortality (14 day)                                       | Epidemiology & risk factors (focus on previous antimicrobial use) & mortality rate for patients with ESBL-EC-COBSI                                                                                                      | EC       |
| Gürttnke S <sup>41</sup>       | 2008-2011 | Germany     | Cohort study, retrospective | Non-ESBL-infection | All kinds of patients             | Entire hospital                                   | All-cause mortality, LOS                                           | Distribution of ESBL genotypes, hospital mortality in cases of ESBL-KP-BSI                                                                                                                                              | KP       |
| Oh MM <sup>42</sup>            | 2006-2011 | South Korea | Cohort study, retrospective | Non-ESBL-infection | Patients after Prostatitis Biopsy | Entire hospital                                   | LOS                                                                | Impact of ESBL-positive-strains on clinical course & progression to chronic prostatitis in patients with postbiopsy acute prostatitis.                                                                                  | GNB      |
| Leistner R <sup>43</sup>       | 2008-2011 | Germany     | Cohort study, retrospective | Non-ESBL-infection | All kinds of patients             | Entire hospital                                   | All-cause mortality, LOS                                           | Financial disease burden attributable to ESBL-positive species in cases of EC-and KP-BSI                                                                                                                                | EC, KP   |
| Lin JN <sup>42</sup>           | 2005-2009 | Taiwan      | Case cohort study           | Non-ESBL-infection | All kinds of patients             | Emergency Room                                    | Attributable mortality, all-cause mortality (28 day), LOS, ICU-LOS | Clinical & microbiological characteristics, risk factors for acquisition of infection, prescription of initial empirical antibiotics mortality rate of infection                                                        | GNB      |
| Ku NS <sup>44</sup>            | 2006-2010 | South Korea | Case cohort study           | Non-ESBL-infection | All kinds of patients             | Entire hospital                                   | All-cause mortality (28 day)                                       | Clinical usefulness of breakpoints for treatment of Enterobacteriaceae-bacteraemia, (focus on EC- and Ks-bacteraemia): CLSI 2009- vs. CLSI 2010-guidelines.                                                             | EC, KP   |

1  
2  
3  
4  
5  
6  
7  
8  
9  
10  
11  
12  
13  
14  
15  
16  
17  
18  
19  
20  
21  
22  
23  
24  
25  
26  
27  
28  
29  
30  
31  
32  
33  
34  
35  
36  
37  
38  
39  
40  
41  
42  
43  
44  
45  
46

|                             | Years     | Country     | Study design                | Control group                                                         | Study population                                             | Setting         | Outcome definition                                   | Main objective                                                                                                                                                                                                                        | Pathogen |
|-----------------------------|-----------|-------------|-----------------------------|-----------------------------------------------------------------------|--------------------------------------------------------------|-----------------|------------------------------------------------------|---------------------------------------------------------------------------------------------------------------------------------------------------------------------------------------------------------------------------------------|----------|
| Anunnatsiri S <sup>45</sup> | 2005-2006 | Thailand    | Cohort study, retrospective | Non-ESBL-infection                                                    | All kinds of patients                                        | Entire hospital | All-cause mortality, LOS                             | Incidence of ESBL-EC-septicemia, factors associated with infection & clinical outcomes                                                                                                                                                | EC       |
| Kang CI <sup>46</sup>       | 1998-2002 | South Korea | Case cohort study           | Non-ESBL-infection                                                    | All kinds of patients                                        | Hospital-wide   | All-cause mortality (28 day)                         | Risk factors for mortality & treatment outcome of ESBL-EC- and ESBL-KP-BSI                                                                                                                                                            | EC, KP   |
| Raviv Y <sup>47</sup>       | 2004-2007 | Israel      | Cohort study, retrospective | Control group: non-ESBL-infection, second control group: no infection | patients with lung transplantation                           | Not provided    | All-cause mortality (28 day)                         | Outcomes of lung transplant recipients infected by CRKP and ESBL carbapenem-sensitive KP (referred to MDR-KP)                                                                                                                         | KP       |
| Kim HJ <sup>13</sup>        | 2005-2010 | South Korea | Cohort study, retrospective | Non-ESBL-infection                                                    | All kinds of patients                                        | Medical ward    | All-cause mortality (28 day), LOS                    | Clinical outcome of patients with biliary tract infection: ESBL-producing bacterial isolates vs. non-ESBL-producing-bacterial isolates, predictors of poor prognosis, impact of ineffective antimicrobial therapy on clinical outcome | EC, KP   |
| MacVane SH <sup>48</sup>    | 2011-2012 | USA         | Cohort study, retrospective | Non-ESBL-infection                                                    | All kinds of patients                                        | Entire hospital | Attributable mortality, all-cause mortality, LOS     | clinical & economic outcomes of patients with ESBL-EC- and ESBL-KP-UTI vs. non-ESBL-EC- and non-ESBL-KP-UTI                                                                                                                           | EC, KP   |
| Abhilash KP <sup>49</sup>   | 2007      | India       | Cohort study, prospective   | Non-ESBL-infection                                                    | All kinds of patients                                        | Entire hospital | All-cause mortality (14 day)                         | Prevalence & risk factors & outcome of antibiotic treatment among hospitalised patients with ESBL-EC- and ESBL-Ks-BSI                                                                                                                 | GNB      |
| Rhantni M <sup>50</sup>     | 2006      | India       | Cohort study, retrospective | Non-ESBL-infection                                                    | All kinds of patients                                        | Entire hospital | All-cause mortality, LOS                             | Prevalence & impact on clinical outcome of ESBL-production among nosocomial isolates of EC & KP                                                                                                                                       | EC, KP   |
| Han SB <sup>51</sup>        | 2009-2013 | South Korea | Cohort study, retrospective | Non-ESBL-infection                                                    | Children (immunocompromised, with cancer, neutropenic fever) | Pediatric ward  | Attributable mortality, all-cause mortality (28 day) | Clinical outcomes of ESBL-EC- and ESBL-KP-bacteraemia & their antibiotic susceptibilities                                                                                                                                             | EC, KP   |
| Lee S <sup>52</sup>         | 2009-2011 | South Korea | Cohort study, retrospective | Non-ESBL-infection                                                    | Patients with Acute Pyelonephritis                           | Entire hospital | All-cause mortality (14 day), LOS                    | Impact of ESBL on clinical outcomes of Acute Pyelonephritis treated with empirical ceftriaxone (which was inappropriate for ESBL-producing organisms)                                                                                 | EC       |
| Artero A <sup>70</sup>      | 2013-2015 | Spain       | Cohort study, prospective   | Non-ESBL-infection                                                    | Elderly                                                      | Medical ward    | All-cause mortality, LOS                             | Identify clinical factors to predict ESBL-EC among elderly patients with UTI admitted to hospital in a high rate setting of ESBL-EC                                                                                                   | EC       |

1  
2  
3  
4  
5  
6  
7  
8  
9  
10  
11  
12  
13  
14  
15  
16  
17  
18  
19  
20  
21  
22  
23  
24  
25  
26  
27  
28  
29  
30  
31  
32  
33  
34  
35  
36  
37  
38  
39  
40  
41  
42  
43  
44  
45  
46

|                                   | Years     | Country  | Study design                | Control group      | Study population                                                                                        | Setting                                      | Outcome definition                | Main objective                                                                                                                                                                                               | Pathogen         |
|-----------------------------------|-----------|----------|-----------------------------|--------------------|---------------------------------------------------------------------------------------------------------|----------------------------------------------|-----------------------------------|--------------------------------------------------------------------------------------------------------------------------------------------------------------------------------------------------------------|------------------|
| Chen IL <sup>71</sup>             | 2004-2015 | Taiwan   | Cohort study, retrospective | Non-ESBL-infection | Neonates                                                                                                | Neonatal ward                                | All-cause mortality               | Compare the clinical characteristics & laboratory data of preterm babies with EC BSI: survival vs. nonsurvival groups, ESBL vs non-ESBL groups, determine the predictive factors of EC BSI in preterm babies | EC               |
| Islas-Munoz B <sup>72</sup>       | 2016-2017 | Mexico   | Cohort study, prospective   | Non-ESBL-infection | Cancer patients                                                                                         | Oncologic ward                               | All-cause mortality (28 day)      | Evaluate the clinical epidemiological characteristics & risk factors associated with mortality in cancer patients with BSI-special emphasis on MDR bacteria                                                  | GNB (and others) |
| Ma J <sup>73</sup>                | 2012-2015 |          | Cohort study, retrospective | Non-ESBL-infection | Patients with hematological diseases                                                                    | Entire hospital                              | All-cause mortality (28 day)      | Evaluate the antimicrobial resistance & clinical features & risk factors for septic shock & death of nosocomial EC-BSI                                                                                       | EC               |
| Man MY <sup>74</sup>              | 2009-2016 | China    | Cohort study, retrospective | Non-ESBL-infection | All kinds of patients, except patients from Burn unit, transplant surgery ward or with thoracic therapy | Entire hospital                              | All-cause mortality (28 day)      | Evaluate the incidence & clinical characteristics & outcomes of patients with KP BSI in critical care & general ward settings                                                                                | KP               |
| Marando R <sup>75</sup>           | 2016      | Tanzania | Cohort study, prospective   | Non-ESBL-infection | Neonates                                                                                                | NICU                                         | All-cause mortality               | Investigate factors associated with ESBL-PE neonatal sepsis & mortality among neonates, characterise selected isolates to show virulence potential & transmission dynamics                                   | GNB              |
| Namikawa H <sup>76</sup>          | 2011-2015 | Japan    | Cohort study, retrospective | Non-ESBL-infection | All kinds of patients                                                                                   | Entire hospital                              | All-cause mortality               | Investigate clinical characteristics of patients with ESBL-EC-BSI                                                                                                                                            | EC               |
| Shi SH <sup>77</sup>              | 2008-2015 | China    | Cohort study, retrospective | Non-ESBL-infection | Patients with pyogenic liver abscess                                                                    | Centre for hepatopancreaticobiliary diseases | All-cause mortality, LOS          | Aetiology & morbidity & clinical characteristics of pyogenic liver abscess caused by ESBL-PE                                                                                                                 | GN               |
| Tanir Basaranoglu S <sup>78</sup> | 2011-2015 | Turkey   | Cohort study, retrospective | Non-ESBL-infection | Children                                                                                                | Pediatric ward                               | All-cause mortality (28 day)      | Assess risk factors for health care associated ESBL-KP-BSI in children, analyze clinical outcomes: ESBL-KP vs. non-ESBL-KP                                                                                   | KP               |
| Bazazi K <sup>79</sup>            | 2009-2015 | France   | Cohort study, prospective   | Non-ESBL-infection | ICU-patients                                                                                            | ICU                                          | All-cause mortality, LOS, ICU-LOS | Determine, among ESBL-PE carriers, the prevalence & associated factors & clinical impact of ESBL-PE pneumonia, determine factors associated with ICUAP caused by carbapenem-resistant bacteria               | GNB              |



1  
2  
3  
4  
5  
6  
7  
8  
9  
10  
11  
12  
13  
14  
15  
16  
17  
18  
19  
20  
21  
22  
23  
24  
25  
26  
27  
28  
29  
30  
31  
32  
33  
34  
35  
36  
37  
38  
39  
40  
41  
42  
43  
44  
45  
46

|                            | Years     | Country      | Study design                | Control group                                                         | Study population      | Setting              | Outcome definition                                                 | Main objective                                                                                                                                                                                                       | Pathogen |
|----------------------------|-----------|--------------|-----------------------------|-----------------------------------------------------------------------|-----------------------|----------------------|--------------------------------------------------------------------|----------------------------------------------------------------------------------------------------------------------------------------------------------------------------------------------------------------------|----------|
| Ray S <sup>80</sup>        | 2014-2016 | India        | Cohort study, prospective   | Non-ESBL-infection                                                    | ICU-patients          | ICU                  | All-cause mortality                                                | Investigate spectrum of microbial resistance pattern in the community and their effects on mortality                                                                                                                 | GNB      |
| Haruki Y <sup>81</sup>     | 2006-2016 | Japan        | Cohort study, retrospective | Non-ESBL-infection                                                    | ICU-patients          | ICU                  | All-cause mortality                                                | Compare the clinical characteristics & outcomes of critically ill patients in an ICU, who were hospitalised for BSI caused by ESBL-EC or non-ESBL-EC.                                                                | GNB      |
| Lin WT <sup>82</sup>       | 2009-2014 | Taiwan       | Cohort study, retrospective | Non-ESBL-infection                                                    | All kinds of patients | Entire hospital      | All-cause mortality                                                | Investigate the clinical manifestations & bacteriological features of culture-proven, GNB arthritis                                                                                                                  | GNB      |
| Guys H <sup>83</sup>       | 2006-2011 | South Africa | Cohort study, retrospective | Non-ESBL-infection                                                    | Children              | Pediatric ward       | All-cause mortality                                                | Describe the clinical presentation of KPBSI, risk factors associated with ESBL-KPBSI, antibiotic susceptibility patterns of the KP isolates & KPBSI mortality including factors associated with in-patient mortality | KP       |
| Lee CC <sup>84</sup>       | 2008-2013 | Taiwan       | Cohort study, retrospective | Non-ESBL-infection                                                    | All kinds of patients | Emergency Department | Attributable mortality, all-cause mortality (28 day), LOS, ICU-LOS | Analyse the impact of ESBL-producing isolates on the outcome of bacteremic patient after controlling for baseline patient characteristics & bacteraemia severity by using a propensity-matched analysis (PSM)        | GNB      |
| Huang YY <sup>85</sup>     | 2011-2013 | Canada       | Case cohort study           | Non-ESBL-infection                                                    | All kinds of patients | Entire hospital      | All-cause mortality, LOS                                           | Determine cumulative incidence of ESBL urosepsis, identify major risk factors for ESBL urosepsis, determine impact of international travel on development of ESBL urosepsis                                          | EC, KP   |
| Komatsu Y <sup>86</sup>    | 2008-2013 | Japan        | Case cohort study           | Non-ESBL-infection                                                    | All kinds of patients | Entire hospital      | All-cause mortality (14 day)                                       | Identify risk factors & clinical outcomes in patients with BSI due to ESBL- or carbapenemase-producing EC, determine prevalence & genetic background                                                                 | EC       |
| Liu MM <sup>87</sup>       | 2011-2016 | China        | Case cohort study           | Control group: non-ESBL-infection, second control group: no infection | ICU-patients          | ICU                  | All-cause mortality                                                | Identify risk factors for ESBL-producing ECBSI among carriers at ICU                                                                                                                                                 | EC       |
| Nivesvivat T <sup>88</sup> | 2010-2017 | Thailand     | Cohort study, retrospective | Non-ESBL-infection                                                    | Children              | Pediatric ward       | All-cause mortality, LOS                                           | Determine prevalence, risk factors & clinical outcomes of ESBL-producing EB in paediatric BSI                                                                                                                        | EC, KP   |

1  
2  
3  
4  
5  
6  
7  
8  
9  
10  
11  
12  
13  
14  
15  
16  
17  
18  
19  
20  
21  
22  
23  
24  
25  
26  
27  
28  
29  
30  
31  
32  
33  
34  
35  
36  
37  
38  
39  
40  
41  
42  
43  
44  
45  
46

|                          | Years     | Country | Study design                | Control group      | Study population                                                | Setting         | Outcome definition                           | Main objective                                                                                                                                                                                                                                                                                                                                                                            | Pathogen |
|--------------------------|-----------|---------|-----------------------------|--------------------|-----------------------------------------------------------------|-----------------|----------------------------------------------|-------------------------------------------------------------------------------------------------------------------------------------------------------------------------------------------------------------------------------------------------------------------------------------------------------------------------------------------------------------------------------------------|----------|
| Cordery RJ <sup>89</sup> | 2004-2006 | UK      | Cohort study, retrospective | Non-ESBL-infection | ICU-patients                                                    | ICU             | All-cause mortality                          | Elucidate specific risk factors for the acquisition of ESBL infection in the ICU; all-cause mortality (in ICU) compared in patients with infections due to ESBL- and non-ESBL-producing organisms                                                                                                                                                                                         | GNB      |
| Paikos GL <sup>90</sup>  | 2003-2005 | Greece  | Cohort study, prospective   | Non-ESBL-infection | All kinds of patients                                           | Entire hospital | All-cause mortality                          | Identify risk factors associated BSI caused by integron-carrying EB; evaluate the consequences of these genetic elements on patient outcome                                                                                                                                                                                                                                               | GNB      |
| Gudiol C <sup>91</sup>   | 2006-2008 | Spain   | Cohort study, prospective   | Non-ESBL-infection | Cancer patients and hematopoietic stem cell transplant patients | Entire hospital | All-cause mortality                          | Assess clinical features, risk factors, molecular epidemiology & outcome of ESBLEC BSI in hospitalised cancer patients                                                                                                                                                                                                                                                                    | EC       |
| Marchaim D <sup>92</sup> | 2006-2008 | Israel  | Cohort study, prospective   | Non-ESBL-infection | All kinds of patients                                           | Entire hospital | All-cause mortality, LOS                     | Define predictors & outcomes of ESBL BSI among patients with bacteraemia due to EB upon hospital admission                                                                                                                                                                                                                                                                                | GNB      |
| Menashe G <sup>93</sup>  | 1997      | Israel  | Cohort study, retrospective | Non-ESBL-infection | All kinds of patients                                           | Entire hospital | All-cause mortality                          | Determine: prevalence of ESBL-P organisms among adult patients with nosocomial EB BSI treated in our institution; association between ESBL production & resistance to other antibiotics; clinical characteristics of patients with nosocomial ESBL-P BSI compared with those infected with non-producing strains; impact of ESBL production on outcome of patients with nosocomial EB BSI | GNB      |
| Ortega M <sup>94</sup>   | 1991-2007 | Spain   | Cohort study, prospective   | Non-ESBL-infection | All kinds of patients                                           | Entire hospital | All-cause mortality                          | Describe source, resistance rate to fluoroquinolone & beta-lactam antibiotics and mortality of EC BSI episodes in a single institution; identify predictive factors for isolation of fluoroquinolone-resistant or ESBL- producing strains.                                                                                                                                                | EC       |
| Sziglyi M <sup>95</sup>  | 2005-2008 | Hungary | Cohort study, retrospective | Non-ESBL-infection | All kinds of patients                                           | Entire hospital | Attributable mortality, all-cause mortality, | Investigate risk factors for & outcomes of BSI caused by ESBL-producing and ESBL-non-producing KP                                                                                                                                                                                                                                                                                         | KP       |
| Tsai SS <sup>96</sup>    | 2005-2006 | Taiwan  | Cohort study, retrospective | Non-ESBL-infection | Diabetic patients                                               | Entire hospital | All-cause mortality                          | Analyze characteristics, risk factors & outcomes of diabetic patients with community- vs. hospital-acquired KP BSI                                                                                                                                                                                                                                                                        | KP       |

1  
2  
3 EC = *Escherichia coli*  
4 KP = *Klebsiella pneumoniae*  
5 GNB = Gram-negative bacteria  
6 BSI = Bloodstream infection  
7 UTI = Urinary tract infection  
8 ICU = Intensive care unit  
9 NICU = Neonatal intensive care unit  
10 ESBL-PE = Extended-spectrum beta-lactamase-producing Enterobacteriaceae  
11 EB = Enterobacteriaceae  
12 LOS = Length of stay  
13  
14  
15  
16  
17  
18  
19  
20  
21  
22  
23  
24  
25  
26  
27  
28  
29  
30  
31  
32  
33  
34  
35  
36  
37  
38  
39  
40  
41  
42  
43  
44  
45  
46

For peer review only

**Supplementary table S5: Risk of bias assessment of case cohort studies according to Newcastle - Ottawa quality assessment scale:**

| Assessment criteria / Study author | 1. Is the case definition adequate? | 2. Representativeness of the cases: | 3. Selection of Controls | 4. Definition of Controls | 5. Comparability of cases and controls on the basis of the design or analysis | 6. Ascertainment of exposure | 7. Same method of ascertainment for cases and controls | 8. Non-Response rate |
|------------------------------------|-------------------------------------|-------------------------------------|--------------------------|---------------------------|-------------------------------------------------------------------------------|------------------------------|--------------------------------------------------------|----------------------|
| Lautenbach, E.                     | Green                               | Green                               | Yellow                   | Yellow                    | Green                                                                         | Green                        | Green                                                  | Green                |
| Apisarntharak, A.                  | Green                               | Green                               | Yellow                   | Green                     | Green                                                                         | Green                        | Green                                                  | Green                |
| Briongos-Figuero, L-S.             | Green                               | Green                               | Yellow                   | Yellow                    | Grey                                                                          | Green                        | Green                                                  | Green                |
| Stone, P.W.                        | Green                               | Green                               | Brown                    | Yellow                    | Grey                                                                          | Green                        | Green                                                  | Green                |
| Kola, A.                           | Green                               | Green                               | Yellow                   | Yellow                    | Green                                                                         | Green                        | Green                                                  | Green                |
| Tsai, M.H.                         | Green                               | Green                               | Yellow                   | Yellow                    | Yellow                                                                        | Green                        | Green                                                  | Green                |
| Maslikowska, J.A.                  | Green                               | Green                               | Yellow                   | Yellow                    | Green                                                                         | Green                        | Green                                                  | Green                |
| Nguyen, M. L.                      | Green                               | Green                               | Yellow                   | Yellow                    | Yellow                                                                        | Green                        | Green                                                  | Green                |
| Denis, B.                          | Green                               | Green                               | Yellow                   | Green                     | Yellow                                                                        | Green                        | Green                                                  | Green                |
| Chopra, T.                         | Green                               | Green                               | Yellow                   | Yellow                    | Green                                                                         | Green                        | Green                                                  | Green                |
| Skippen, I.                        | Green                               | Green                               | Yellow                   | Yellow                    | Yellow                                                                        | Green                        | Grey                                                   | Green                |
| Apisarntharak, A.                  | Green                               | Green                               | Yellow                   | Yellow                    | Yellow                                                                        | Green                        | Green                                                  | Green                |
| Tumbarello, M.                     | Green                               | Green                               | Yellow                   | Yellow                    | Green                                                                         | Green                        | Green                                                  | Green                |
| Apisarntharak, A.                  | Green                               | Green                               | Yellow                   | Yellow                    | Green                                                                         | Green                        | Green                                                  | Green                |
| Kanafani, Z. A.                    | Green                               | Green                               | Yellow                   | Yellow                    | Green                                                                         | Green                        | Green                                                  | Green                |
| Zaoutis, T. E.                     | Green                               | Green                               | Yellow                   | Yellow                    | Yellow                                                                        | Green                        | Green                                                  | Green                |
| Song, K. H.                        | Green                               | Green                               | Yellow                   | Yellow                    | Green                                                                         | Green                        | Green                                                  | Green                |
| Kang, C. I.                        | Green                               | Green                               | Yellow                   | Yellow                    | Grey                                                                          | Green                        | Green                                                  | Green                |
| Rodriguez-Bano, J.                 | Green                               | Green                               | Yellow                   | Yellow                    | Yellow                                                                        | Green                        | Green                                                  | Green                |
| Lin, J. N.                         | Green                               | Green                               | Yellow                   | Yellow                    | Green                                                                         | Green                        | Green                                                  | Green                |
| Ku, N. S.                          | Green                               | Green                               | Yellow                   | Yellow                    | Green                                                                         | Green                        | Green                                                  | Green                |
| Kang, C. I.                        | Green                               | Green                               | Yellow                   | Yellow                    | Green                                                                         | Green                        | Green                                                  | Green                |
| Huang, Y. Y.                       | Green                               | Green                               | Yellow                   | Yellow                    | Yellow                                                                        | Green                        | Green                                                  | Green                |
| Komatsu, Y.                        | Green                               | Green                               | Yellow                   | Yellow                    | Yellow                                                                        | Green                        | Green                                                  | Green                |
| Liu, M. M.                         | Green                               | Green                               | Yellow                   | Green                     | Yellow                                                                        | Green                        | Green                                                  | Green                |

Risk of bias assessment of cohort studies according to Newcastle - Ottawa quality assessment scale:

| Study author / Assessment criteria | 1. Representativeness of exposed cohort | 2. Selection of non-exposed cohort | 3. Ascertainment of exposure | 4. Demonstration that outcome of interest not present at start | 5. Comparability based on design or analysis | 6. Assessment of outcome | 7. Follow-up long enough for outcome | 8. Adequacy of follow up of cohorts |
|------------------------------------|-----------------------------------------|------------------------------------|------------------------------|----------------------------------------------------------------|----------------------------------------------|--------------------------|--------------------------------------|-------------------------------------|
| Jean, S.S.                         | Yellow                                  | Green                              | Green                        | Green                                                          | Green                                        | Yellow                   | Green                                | Green                               |
| Bhavnani, S. M.                    | Green                                   | Green                              | Green                        | Green                                                          | Yellow                                       | Yellow                   | Green                                | Green                               |
| Blomberg, B.                       | Yellow                                  | Green                              | Green                        | Green                                                          | Grey                                         | Yellow                   | Green                                | Green                               |
| Pena, C.                           | Green                                   | Green                              | Green                        | Green                                                          | Yellow                                       | Yellow                   | Green                                | Green                               |
| Onken, A.                          | Green                                   | Green                              | Green                        | Green                                                          | Grey                                         | Yellow                   | Green                                | Green                               |
| Melzer, M.                         | Green                                   | Green                              | Green                        | Green                                                          | Grey                                         | Yellow                   | Green                                | Green                               |
| Bennet, J.                         | Green                                   | Green                              | Green                        | Green                                                          | Yellow                                       | Yellow                   | Green                                | Green                               |
| Wu, Y.                             | Yellow                                  | Green                              | Green                        | Green                                                          | Yellow                                       | Yellow                   | Green                                | Green                               |
| Abhilash, K.                       | Green                                   | Green                              | Green                        | Green                                                          | Green                                        | Yellow                   | Yellow                               | Green                               |
| Artero, A.                         | Yellow                                  | Green                              | Green                        | Green                                                          | Yellow                                       | Yellow                   | Green                                | Green                               |
| Islas-Munos, B.                    | Green                                   | Green                              | Green                        | Green                                                          | Yellow                                       | Yellow                   | Green                                | Green                               |
| Marando, R.                        | Green                                   | Green                              | Green                        | Green                                                          | Yellow                                       | Yellow                   | Green                                | Green                               |
| Razazi, K.                         | Green                                   | Green                              | Green                        | Green                                                          | Green                                        | Yellow                   | Green                                | Green                               |
| Ray, S.                            | Green                                   | Green                              | Green                        | Green                                                          | Yellow                                       | Yellow                   | Green                                | Green                               |
| Panhotra, B.                       | Green                                   | Green                              | Green                        | Green                                                          | Green                                        | Yellow                   | Green                                | Green                               |
| Kim, S.                            | Green                                   | Green                              | Green                        | Green                                                          | Green                                        | Yellow                   | Green                                | Green                               |
| Chayakulkeeree, M.                 | Green                                   | Green                              | Green                        | Green                                                          | Green                                        | Yellow                   | Green                                | Green                               |
| Apisarnthanarak, A.                | Yellow                                  | Green                              | Green                        | Green                                                          | Green                                        | Yellow                   | Green                                | Green                               |
| Ha, Y.                             | Yellow                                  | Green                              | Green                        | Green                                                          | Yellow                                       | Yellow                   | Green                                | Green                               |
| Du, B                              | Green                                   | Green                              | Green                        | Green                                                          | Green                                        | Yellow                   | Green                                | Green                               |
| Pillay, T.                         | Yellow                                  | Green                              | Green                        | Green                                                          | Grey                                         | Yellow                   | Green                                | Green                               |
| Kim, B.                            | Green                                   | Green                              | Green                        | Green                                                          | Green                                        | Yellow                   | Green                                | Green                               |
| Kim, Y                             | Green                                   | Green                              | Green                        | Green                                                          | Green                                        | Yellow                   | Green                                | Green                               |
| Marra, A.                          | Green                                   | Green                              | Green                        | Green                                                          | Green                                        | Yellow                   | Green                                | Green                               |
| Schwaber, M.                       | Yellow                                  | Green                              | Green                        | Green                                                          | Green                                        | Yellow                   | Green                                | Green                               |
| Leistner, R.                       | Green                                   | Green                              | Green                        | Green                                                          | Yellow                                       | Yellow                   | Green                                | Green                               |
| Loh, L.C.                          | Green                                   | Green                              | Green                        | Green                                                          | Green                                        | Yellow                   | Green                                | Red                                 |
| Trecarichi, E.                     | Yellow                                  | Green                              | Green                        | Green                                                          | Yellow                                       | Yellow                   | Green                                | Green                               |
| Tuon, F.                           | Green                                   | Green                              | Green                        | Green                                                          | Green                                        | Yellow                   | Green                                | Green                               |
| Kang, C. I.                        | Yellow                                  | Green                              | Green                        | Green                                                          | Green                                        | Yellow                   | Green                                | Green                               |
| Pena, C.                           | Green                                   | Green                              | Green                        | Green                                                          | Grey                                         | Yellow                   | Green                                | Green                               |
| Tumbarello, M.                     | Yellow                                  | Green                              | Green                        | Green                                                          | Green                                        | Yellow                   | Green                                | Green                               |
| Gurntke, S.                        | Green                                   | Green                              | Green                        | Green                                                          | Green                                        | Yellow                   | Green                                | Green                               |
| Oh, M.                             | Yellow                                  | Green                              | Green                        | Green                                                          | Green                                        | Yellow                   | Green                                | Green                               |
| Leistner, R.                       | Green                                   | Green                              | Green                        | Green                                                          | Grey                                         | Yellow                   | Green                                | Green                               |
| Anunnatsiri                        | Yellow                                  | Green                              | Green                        | Green                                                          | Green                                        | Yellow                   | Green                                | Green                               |

|    |                       |        |       |       |       |        |        |       |       |
|----|-----------------------|--------|-------|-------|-------|--------|--------|-------|-------|
| 1  | Raviv, Y.             | Yellow | Green | Green | Green | Yellow | Yellow | Green | Green |
| 2  | Kim, H.J.             | Yellow | Green | Green | Green | Green  | Yellow | Green | Green |
| 3  | MacVane, S.           | Yellow | Green | Green | Green | Green  | Yellow | Green | Green |
| 4  | Shanthi               | Yellow | Green | Green | Green | Yellow | Yellow | Green | Green |
| 5  | Han, S.B.             | Yellow | Green | Green | Green | Green  | Yellow | Green | Green |
| 6  | Han, S.B.             | Yellow | Green | Green | Green | Green  | Yellow | Green | Green |
| 7  | Lee, S.               | Green  | Green | Green | Green | Yellow | Yellow | Green | Green |
| 8  | Chen, I-L.            | Green  | Green | Green | Green | Yellow | Yellow | Green | Green |
| 9  | Ma, J.                | Green  | Green | Green | Green | Green  | Yellow | Green | Green |
| 10 | Ma, J.                | Green  | Green | Green | Green | Green  | Yellow | Green | Green |
| 11 | Man, M.               | Yellow | Green | Green | Green | Yellow | Yellow | Green | Green |
| 12 | Namikawa, H.          | Yellow | Green | Green | Green | Yellow | Yellow | Green | Green |
| 13 | Namikawa, H.          | Yellow | Green | Green | Green | Yellow | Yellow | Green | Green |
| 14 | Shi, S.               | Yellow | Green | Green | Green | Grey   | Yellow | Green | Green |
| 15 | Tanir Basarangolu, S. | Yellow | Green | Green | Green | Yellow | Yellow | Green | Green |
| 16 | Tanir Basarangolu, S. | Yellow | Green | Green | Green | Yellow | Yellow | Green | Green |
| 17 | Haruki, Y.            | Yellow | Green | Green | Green | Green  | Yellow | Green | Green |
| 18 | Lin, W.               | Green  | Green | Green | Green | Grey   | Yellow | Green | Green |
| 19 | Lin, W.               | Green  | Green | Green | Green | Green  | Yellow | Green | Green |
| 20 | Buys, H.              | Green  | Green | Green | Green | Green  | Yellow | Green | Green |
| 21 | Lee, C.C.             | Yellow | Green | Green | Green | Green  | Yellow | Green | Green |
| 22 | Lee, C.C.             | Yellow | Green | Green | Green | Green  | Yellow | Green | Green |
| 23 | Nivesvivat, T.        | Yellow | Green | Green | Green | Green  | Yellow | Green | Green |
| 24 | Nivesvivat, T.        | Yellow | Green | Green | Green | Green  | Yellow | Green | Green |
| 25 |                       |        |       |       |       |        |        |       |       |
| 26 |                       |        |       |       |       |        |        |       |       |
| 27 |                       |        |       |       |       |        |        |       |       |
| 28 |                       |        |       |       |       |        |        |       |       |
| 29 |                       |        |       |       |       |        |        |       |       |
| 30 |                       |        |       |       |       |        |        |       |       |
| 31 |                       |        |       |       |       |        |        |       |       |
| 32 |                       |        |       |       |       |        |        |       |       |
| 33 |                       |        |       |       |       |        |        |       |       |
| 34 |                       |        |       |       |       |        |        |       |       |
| 35 |                       |        |       |       |       |        |        |       |       |
| 36 |                       |        |       |       |       |        |        |       |       |
| 37 |                       |        |       |       |       |        |        |       |       |
| 38 |                       |        |       |       |       |        |        |       |       |
| 39 |                       |        |       |       |       |        |        |       |       |
| 40 |                       |        |       |       |       |        |        |       |       |
| 41 |                       |        |       |       |       |        |        |       |       |
| 42 |                       |        |       |       |       |        |        |       |       |
| 43 |                       |        |       |       |       |        |        |       |       |
| 44 |                       |        |       |       |       |        |        |       |       |
| 45 |                       |        |       |       |       |        |        |       |       |
| 46 |                       |        |       |       |       |        |        |       |       |
| 47 |                       |        |       |       |       |        |        |       |       |
| 48 |                       |        |       |       |       |        |        |       |       |
| 49 |                       |        |       |       |       |        |        |       |       |
| 50 |                       |        |       |       |       |        |        |       |       |
| 51 |                       |        |       |       |       |        |        |       |       |
| 52 |                       |        |       |       |       |        |        |       |       |
| 53 |                       |        |       |       |       |        |        |       |       |
| 54 |                       |        |       |       |       |        |        |       |       |
| 55 |                       |        |       |       |       |        |        |       |       |
| 56 |                       |        |       |       |       |        |        |       |       |
| 57 |                       |        |       |       |       |        |        |       |       |
| 58 |                       |        |       |       |       |        |        |       |       |
| 59 |                       |        |       |       |       |        |        |       |       |
| 60 |                       |        |       |       |       |        |        |       |       |

For peer review only

**Supplementary table S6: Source of heterogeneity among effect estimates in studies on ESBL bloodstream infections in comparison with patients with non-ESBL bloodstream infections assessed using univariate meta-regression:**

| Subgroups / Outcome                  | All-cause mortality | Length of Stay |
|--------------------------------------|---------------------|----------------|
| Mortality time                       | 0.85                | -              |
| Pathogen                             | 0.45                | 0.34           |
| Study design                         | 0.51                | 0.21           |
| Study country                        | 0.22                | 0.09           |
| Income classification                | 0.17                | 0.80           |
| Study period                         | 0.57                | 0.78           |
| Study setting: ICU ward              | 0.78                | 0.97           |
| Study setting: Neonatal ward         | 0.62                | 0.97           |
| Study setting: Pediatric ward        | 0.96                | 0.96           |
| Study population: ICU patients       | 1.00                | -              |
| Study population: Children           | 0.96                | 0.96           |
| Study population: Neonates           | 0.62                | 0.97           |
| Information about therapy            | 0.53                |                |
| Appropriateness of therapy reported  | 0.68                |                |
| Information about outcome of therapy | 0.74                | -              |
| MIC reported                         | 0.28                | -              |



# PRISMA 2009 Checklist

| Section/topic                      | #  | Checklist item                                                                                                                                                                                                                                                                                              | Reported on page # |
|------------------------------------|----|-------------------------------------------------------------------------------------------------------------------------------------------------------------------------------------------------------------------------------------------------------------------------------------------------------------|--------------------|
| <b>TITLE</b>                       |    |                                                                                                                                                                                                                                                                                                             |                    |
| Title                              | 1  | Identify the report as a systematic review, meta-analysis, or both.                                                                                                                                                                                                                                         | 1                  |
| <b>ABSTRACT</b>                    |    |                                                                                                                                                                                                                                                                                                             |                    |
| Structured summary                 | 2  | Provide a structured summary including, as applicable: background; objectives; data sources; study eligibility criteria, participants, and interventions; study appraisal and synthesis methods; results; limitations; conclusions and implications of key findings; systematic review registration number. | 2                  |
| <b>INTRODUCTION</b>                |    |                                                                                                                                                                                                                                                                                                             |                    |
| Rationale                          | 3  | Describe the rationale for the review in the context of what is already known.                                                                                                                                                                                                                              | 4                  |
| Objectives                         | 4  | Provide an explicit statement of questions being addressed with reference to participants, interventions, comparisons, outcomes, and study design (PICOS).                                                                                                                                                  | 4                  |
| <b>METHODS</b>                     |    |                                                                                                                                                                                                                                                                                                             |                    |
| Protocol and registration          | 5  | Indicate if a review protocol exists, if and where it can be accessed (e.g., Web address), and, if available, provide registration information including registration number.                                                                                                                               | 6                  |
| Eligibility criteria               | 6  | Specify study characteristics (e.g., PICOS, length of follow-up) and report characteristics (e.g., years considered, language, publication status) used as criteria for eligibility, giving rationale.                                                                                                      | 5                  |
| Information sources                | 7  | Describe all information sources (e.g., databases with dates of coverage, contact with study authors to identify additional studies) in the search and date last searched.                                                                                                                                  | 4                  |
| Search                             | 8  | Present full electronic search strategy for at least one database, including any limits used, such that it could be repeated.                                                                                                                                                                               | 4                  |
| Study selection                    | 9  | State the process for selecting studies (i.e., screening, eligibility, included in systematic review, and, if applicable, included in the meta-analysis).                                                                                                                                                   | 5                  |
| Data collection process            | 10 | Describe method of data extraction from reports (e.g., piloted forms, independently, in duplicate) and any processes for obtaining and confirming data from investigators.                                                                                                                                  | 5                  |
| Data items                         | 11 | List and define all variables for which data were sought (e.g., PICOS, funding sources) and any assumptions and simplifications made.                                                                                                                                                                       | 5                  |
| Risk of bias in individual studies | 12 | Describe methods used for assessing risk of bias of individual studies (including specification of whether this was done at the study or outcome level), and how this information is to be used in any data synthesis.                                                                                      | 6                  |
| Summary measures                   | 13 | State the principal summary measures (e.g., risk ratio, difference in means).                                                                                                                                                                                                                               | 5                  |
| Synthesis of results               | 14 | Describe the methods of handling data and combining results of studies, if done, including measures of consistency (e.g., $I^2$ ) for each meta-analysis.                                                                                                                                                   | 5,6                |





# PRISMA 2009 Checklist

Page 1 of 2

| Section/topic                 | #  | Checklist item                                                                                                                                                                                           | Reported on page #    |
|-------------------------------|----|----------------------------------------------------------------------------------------------------------------------------------------------------------------------------------------------------------|-----------------------|
| Risk of bias across studies   | 15 | Specify any assessment of risk of bias that may affect the cumulative evidence (e.g., publication bias, selective reporting within studies).                                                             | 6                     |
| Additional analyses           | 16 | Describe methods of additional analyses (e.g., sensitivity or subgroup analyses, meta-regression), if done, indicating which were pre-specified.                                                         | 6                     |
| <b>RESULTS</b>                |    |                                                                                                                                                                                                          |                       |
| Study selection               | 17 | Give numbers of studies screened, assessed for eligibility, and included in the review, with reasons for exclusions at each stage, ideally with a flow diagram.                                          | 6                     |
| Study characteristics         | 18 | For each study, present characteristics for which data were extracted (e.g., study size, PICOS, follow-up period) and provide the citations.                                                             | suppl.material        |
| Risk of bias within studies   | 19 | Present data on risk of bias of each study and, if available, any outcome level assessment (see item 12).                                                                                                | 8 and suppl. material |
| Results of individual studies | 20 | For all outcomes considered (benefits or harms), present, for each study: (a) simple summary data for each intervention group (b) effect estimates and confidence intervals, ideally with a forest plot. | suppl.material        |
| Synthesis of results          | 21 | Present results of each meta-analysis done, including confidence intervals and measures of consistency.                                                                                                  | 6-8                   |
| Risk of bias across studies   | 22 | Present results of any assessment of risk of bias across studies (see Item 15).                                                                                                                          | 8 and suppl. material |
| Additional analysis           | 23 | Give results of additional analyses, if done (e.g., sensitivity or subgroup analyses, meta-regression [see Item 16]).                                                                                    | 7,8                   |
| <b>DISCUSSION</b>             |    |                                                                                                                                                                                                          |                       |
| Summary of evidence           | 24 | Summarize the main findings including the strength of evidence for each main outcome; consider their relevance to key groups (e.g., healthcare providers, users, and policy makers).                     | 9                     |
| Limitations                   | 25 | Discuss limitations at study and outcome level (e.g., risk of bias), and at review-level (e.g., incomplete retrieval of identified research, reporting bias).                                            | 10                    |
| Conclusions                   | 26 | Provide a general interpretation of the results in the context of other evidence, and implications for future research.                                                                                  | 11                    |
| <b>FUNDING</b>                |    |                                                                                                                                                                                                          |                       |
| Funding                       | 27 | Describe sources of funding for the systematic review and other support (e.g., supply of data); role of funders for the systematic review.                                                               | 11                    |



# PRISMA 2009 Checklist

- 1
- 2
- 3
- 4
- 5
- 6
- 7
- 8
- 9
- 10
- 11
- 12
- 13
- 14
- 15
- 16
- 17
- 18
- 19
- 20
- 21
- 22
- 23
- 24
- 25
- 26
- 27
- 28
- 29
- 30
- 31
- 32
- 33
- 34
- 35
- 36
- 37
- 38
- 39
- 40
- 41
- 42
- 43
- 44
- 45
- 46
- 47

For more information, visit: [www.prisma-statement.org](http://www.prisma-statement.org).

Page 2 of 2

For peer review only
