# Supplementary material for: Variation of effect estimates in the analysis of mortality and length of hospital stay in patients with infections caused by bacteria-producing extended-spectrum beta-lactamases: a systematic review and meta-analysis
Source: PubMed Central journal article supplement — BMJ Open. 2020 Jan 20;10(1):e030266. doi: 10.1136/bmjopen-2019-030266 (PMC7044956; doi:10.1136/bmjopen-2019-030266), 2020-01-20
Supplement: bmjopen-2019-030266supp006.pdf [file bmjopen-2019-030266supp006.pdf]

Supplementary table S4: Characteristics for each study

|                                    | Years     | Country                                               | Study design                | Control group      | Study population                                                                          | Setting                    | Outcome definition           | Main objective                                                                                                                                                                                                       | Pathogen |
|------------------------------------|-----------|-------------------------------------------------------|-----------------------------|--------------------|-------------------------------------------------------------------------------------------|----------------------------|------------------------------|----------------------------------------------------------------------------------------------------------------------------------------------------------------------------------------------------------------------|----------|
| Lautenbach E <sup>10</sup>         | 1997-1998 | USA                                                   | Case cohort study           | Non-ESBL-infection | All kinds of patients                                                                     | Entire hospital            | Attributable mortality; LOS  | Risk factors for infection with ESBL-producing pathogens, difference in clinical outcomes of infections: resistant vs. susceptible organisms                                                                         | EC, KP   |
| Kim SH <sup>14</sup>               | 2007-2008 | South Korea                                           | Cohort study, Retrospective | Non-ESBL-infection | Patients who received either chemotherapy or stem cell transplantation; neutropenic fever | Hematological ward, Others | All-cause mortality (28 day) | Risk factors for acquisition of ESBL, appropriateness of empirical antimicrobial therapy, clinical outcomes in relation to ESBL production                                                                           | EC, KP   |
| Chayakulkeere M <sup>53</sup>      | 2015-2015 | Thailand                                              | Cohort study, Retrospective | Non-ESBL-infection | All kinds of patients                                                                     | Entire hospital            | All-cause mortality          | Prevalence & risk factors for infections with & antibiotic susceptibility patterns of & outcomes of patients infected with ESBL-producing-GNB                                                                        | GNB      |
| Apisarntharak A <sup>54</sup>      | 2003-2007 | Thailand                                              | Cohort study, Retrospective | Non-ESBL-infection | All kinds of patients                                                                     | Entire hospital            | All-cause mortality, LOS     | Predictors for mortality associated with community-onset BSI with ESBL-producing pathogens, initial empirical antimicrobial regimens, associated hospital resource utilisation, costs accrued after diagnosis of BSI | EC, KP   |
| Apisarntharak A <sup>55</sup>      | 2003-2004 | Thailand                                              | Case cohort study           | Non-ESBL-infection | All kinds of patients                                                                     | Entire hospital            | All-cause mortality, LOS     | Mortality associated with community-onset infection due to ESBL-producing pathogens, associated hospital resource use, post-infection hospital cost                                                                  | EC       |
| Jean SS <sup>56</sup>              | 2010-2011 | Portugal, Columbia, the Philippines, Taiwan, Thailand | Cohort study, prospective   | Non-ESBL-infection | All kinds of patients                                                                     | Surgical ward              | Attributable mortality, LOS  | Clinical impact on hospitalised patients with community-acquired complicated intra-abdominal infection: ESBL-producing- vs. non-ESBL-producing pathogens                                                             | GNB      |
| Lee J <sup>57</sup>                | 1999-2005 | South Korea                                           | interventional studies      | Non-ESBL-infection | Children                                                                                  | Pediatric ward             | All-cause mortality (28 day) | impact of a change in antibiotic policy on ESBL-prevalence                                                                                                                                                           | EC, KP   |
| Briogoso-Figuero L.S <sup>58</sup> | 2009-2010 | Spain                                                 | Case cohort study           | Non-ESBL-infection | All kinds of patients                                                                     | Entire hospital            | All-cause mortality          | Characteristics & associated risk factors for EBSL-enterobacteria-UTIs                                                                                                                                               | EC       |
| Ha YE <sup>59</sup>                | 2010-2012 | South Korea                                           | Cohort study, retrospective | Non-ESBL-infection | Patients with cancer                                                                      | Entire hospital            | All-cause mortality (28 day) | Clinical & molecular epidemiology of ESBL-EC bacteraemia, clinical impact of ESBLs on patient outcome                                                                                                                | EC       |
| Du B <sup>60</sup>                 | 1997-1999 | China                                                 | Cohort study, retrospective | Non-ESBL-infection | All kinds of patients                                                                     | Entire hospital            | All-cause mortality          | Risk factors for nosocomial ESBL-EC- and ESBL-KP- bacteraemia & influence on patient outcome.                                                                                                                        | EC, KP   |

|                              | Years     | Country      | Study design                | Control group                                                                      | Study population      | Setting         | Outcome definition                               | Main objective                                                                                                                                                                                                                                                                                                                                                                                                                                                                                                          | Pathogen |
|------------------------------|-----------|--------------|-----------------------------|------------------------------------------------------------------------------------|-----------------------|-----------------|--------------------------------------------------|-------------------------------------------------------------------------------------------------------------------------------------------------------------------------------------------------------------------------------------------------------------------------------------------------------------------------------------------------------------------------------------------------------------------------------------------------------------------------------------------------------------------------|----------|
| Stone PW <sup>61</sup>       | 2001      | USA          | Case cohort study           | Non-ESBL-infection                                                                 | Neonates at NICU      | NICU            | LOS                                              | costs of interventions aimed at controlling the outbreak, attributable length of stay associated with infection and colonisation with ESBL-KP                                                                                                                                                                                                                                                                                                                                                                           | KP       |
| Pillay T <sup>15</sup>       | 1995-1996 | South Africa | Cohort study, retrospective | Non-ESBL-infection                                                                 | Neonates              | Neonatal ward   | All-cause mortality                              | Use of piperacillin/tazobactam in treatment of KP- infection                                                                                                                                                                                                                                                                                                                                                                                                                                                            | KP       |
| Kim BN <sup>16</sup>         | 1999-2000 | South Korea  | Cohort study, retrospective | Non-ESBL-infection                                                                 | All kinds of patients | Entire hospital | Attributable mortality, LOS                      | Prevalence & clinical characteristics of ESBL-KP- bacteraemia, impact of ESBL- production on outcome of patients with KP- bacteraemia in endemic situation.                                                                                                                                                                                                                                                                                                                                                             | KP       |
| Kim YK <sup>17</sup>         | 1993-1998 | South Korea  | Cohort study, retrospective | Non-ESBL-infection                                                                 | Children              | Pediatric ward  | All-cause mortality                              | Risk factors & clinical outcomes & clinical responses to treatment of ESBL-EC- and ESBL-KP-bacteraemia, prevalence and types of their ESBLs                                                                                                                                                                                                                                                                                                                                                                             | EC, KP   |
| Bhavnani SM <sup>18</sup>    | 2001-2002 | USA          | Cohort study, prospective   | Non-ESBL-infection                                                                 | All kinds of patients | Entire hospital | Attributable mortality, all-cause mortality      | Risk factors for occurrence of invasive ESBL-EC- and ESBL-KP-infections, factors associated with clinical outcome, drug regimens for treatment of infections associated ESBL/non-ESBL strains in real-life clinical practice, clinical response rates for patients treated with cephalosporins/other classes of antimicrobial agents, /carbapenems, clinical response for those patients with infection associated with ESBL and non-ESBL-producing strains with MIC values $\geq 8$ Ag/mL treated with cephalosporins. | GNB      |
| Blomberg B <sup>19</sup>     | 2001-2002 | Tanzania     | Cohort study, prospective   | Non-ESBL-infection                                                                 | Neonates, children    | Pediatric ward  | All-cause mortality                              | Prevalence & clinical implications of ESBL production in EC-,KP-, Salmonellae- septicemia                                                                                                                                                                                                                                                                                                                                                                                                                               | GNB      |
| Pena C <sup>62</sup>         | 1993-1995 | Spain        | Cohort study, prospective   | Non-ESBL-infection                                                                 | All kinds of patients | Entire hospital | Attributable mortality, all-cause mortality      | Clinical epidemiology& outcome of ESBL-KP- bacteraemia, relevance of ESBL strains in mortality of patients with hospital-acquired KP-BSI.                                                                                                                                                                                                                                                                                                                                                                               | KP       |
| Kola A <sup>63</sup>         | 2002-2004 | Germany      | Case cohort study           | Non-ESBL-infection                                                                 | All kinds of patients | Entire hospital | All-cause mortality, LOS, ICU-LOS                | Outcomes of ESBL-EC- and ESBL-KP-infections                                                                                                                                                                                                                                                                                                                                                                                                                                                                             | EC, KP   |
| Tsai MH <sup>64</sup>        | 2001-2012 | Taiwan       | Case cohort study           | Control group: non-ESBL-infection, second control group: all hospitalised patients | Neonates at NICU      | NICU            | Attributable mortality, all-cause mortality, LOS | Clinical features& risk factors& molecular epidemiology of ESBL-GNB                                                                                                                                                                                                                                                                                                                                                                                                                                                     | GNB      |
| Maslikowska JA <sup>65</sup> | 2010-2013 | Canada       | Case cohort study           | Non-ESBL-infection                                                                 | All kinds of patients | Entire hospital | Attributable mortality, all-cause mortality, LOS | Differences in clinical & microbiological outcome, mortality, and/or hospital resource use: ESBL-EC- and ESBL-Ks- vs non-ESBL-EC- and non-ESBL-Ks-infections                                                                                                                                                                                                                                                                                                                                                            | GNB      |

|                                 | Years     | Country                 | Study design                | Control group                                                            | Study population      | Setting          | Outcome definition                                        | Main objective                                                                                                                                                                                     | Pathogen |
|---------------------------------|-----------|-------------------------|-----------------------------|--------------------------------------------------------------------------|-----------------------|------------------|-----------------------------------------------------------|----------------------------------------------------------------------------------------------------------------------------------------------------------------------------------------------------|----------|
| Onken A <sup>66</sup>           | 2012-2013 | Tanzania                | Cohort study, prospective   | Non-ESBL-infection                                                       | All kinds of patients | Entire hospital  | All-cause mortality                                       | Most common bacterial pathogens causing BSI, antimicrobial susceptibility                                                                                                                          | GNB      |
| Nguyen ML <sup>67</sup>         | 2005-2010 | Canada                  | Case cohort study           | Non-ESBL-infection                                                       | All kinds of patients | Entire hospital  | All-cause mortality, LOS, ICU-LOS                         | Risk factors for & patient outcomes associated with ESBL-EC- and ESBL-Ks- bacteraemia, appropriateness of empiric antibiotic therapy & effect of inappropriate empiric therapy on outcomes         | GNB      |
| Denis B <sup>68</sup>           | 2005-2009 | France                  | Case-control study          | Non-ESBL-infection                                                       | All kinds of patients | Entire hospital  | All-cause mortality (28 day), LOS                         | Prevalence & risk factors for ESBL-EC bacteraemia, impact on length of stay & 30day mortality                                                                                                      | EC       |
| Chopra T <sup>69</sup>          | 2004-2009 | USA                     | Case cohort study           | Case 2(Control1): non-ESBL-infection, second control group: no infection | All kinds of patients | Entire hospital  | All-cause mortality (28 day)                              | Predictors of ESBL-EC- and ESBL-KP-BSI, focus on cefepime exposure.                                                                                                                                | EC, KP   |
| Panhotra BR <sup>20</sup>       | 2001-2003 | Kingdom of Saudi Arabia | Case cohort study           | Non-ESBL-infection                                                       | All kinds of patients | Entire hospital  | All-cause mortality                                       | Risk factors & clinical outcome of ESBL-KP-bacteraemia (hospital acquired)                                                                                                                         | KP       |
| Marra AR <sup>21</sup>          | 1996-2001 | Brazil                  | Cohort study, retrospective | Non-ESBL-infection                                                       | All kinds of patients | Entire hospital  | All-cause mortality (14 day)                              | ESBL-KP- associated mortality                                                                                                                                                                      | KP       |
| Skippen I <sup>22</sup>         | 2003-2005 | UK                      | Case cohort study           | Non-ESBL-infection                                                       | All kinds of patients | Entire hospital  | All-cause mortality                                       | Risk factors for & outcomes of ESBL-EC- and ESBL-KP-invasive transmission of organism in the healthcare setting                                                                                    | GNB      |
| Schwaber MJ <sup>23</sup>       | 2000-2003 | Israel                  | Cohort study, retrospective | Non-ESBL-infection                                                       | All kinds of patients | Entire hospital  | Attributable mortality, all-cause mortality               | Outcomes of ESBL-production in Enterobacteriaceae-bacteraemia.                                                                                                                                     | GNB      |
| Apisarnthanarak A <sup>24</sup> | 2003-2004 | Thailand                | Case cohort study           | Control group: non-ESBL-infection, second control group: no infection    | All adult patients    | Entire hospital  | All-cause mortality, LOS                                  | Clinical & molecular epidemiologic factors associated with community onset ESBL-EC- infections, hospital resource utilisation, estimate costs associated with medical care (hospitalised patients) | EC       |
| Tumbarello M <sup>25</sup>      | 1999-2003 | Italy                   | Case cohort study           | Non-ESBL-infection                                                       | All kinds of patients | Entire hospital  | Attributable mortality, all-cause mortality, LOS, ICU-LOS | Factors associated with isolation of ESBL- KP-strains                                                                                                                                              | KP       |
| Leistner R <sup>11</sup>        | 2008-2010 | Germany                 | Cohort study, retrospective | Non-ESBL-infection                                                       | All kinds of patients | Entire hospital, | All-cause mortality, LOS                                  | Difference in mortality: ESBL-EC-BSIs vs. non-ESBL-EC-BSIs, molecular epidemiology of ESBL-positive isolates                                                                                       | EC       |

|                                 | Years     | Country     | Study design                | Control group                                                         | Study population                                | Setting                       | Outcome definition                | Main objective                                                                                                                                                                                                                                                            | Pathogen |
|---------------------------------|-----------|-------------|-----------------------------|-----------------------------------------------------------------------|-------------------------------------------------|-------------------------------|-----------------------------------|---------------------------------------------------------------------------------------------------------------------------------------------------------------------------------------------------------------------------------------------------------------------------|----------|
| Apisarnthanarak A <sup>26</sup> | 2003-2004 | Thailand    | Case cohort study           | Control group: non-ESBL-infection, second control group: no infection | All kinds of patients                           | Entire hospital               | All-cause mortality, LOS          | Risk factors for & outcomes of ESBL-EC- and ESBL-KP-infections (healthcare associated)                                                                                                                                                                                    | EC, KP   |
| Kanafani ZA <sup>27</sup>       | 2003      | Lebanon     | Case cohort study           | Non-ESBL-infection                                                    | All kinds of patients                           | Entire hospital               | All-cause mortality, LOS          | Epidemiology of infections with ESBL-EC and ESBL-Ks at AUBMC risk factors & outcomes of infections - focus on effect of prior antibiotic administration & the risks imparted by specific classes of antimicrobial agents                                                  | GNB      |
| Zaoutis TE <sup>28</sup>        | 1999-2003 | USA         | Case cohort study           | Non-ESBL-infection                                                    | Children                                        | Entire hospital               | All-cause mortality, LOS          | Risk factors & outcomes associated with ESBL-EC-and ESBL-KP-BSI                                                                                                                                                                                                           | EC, KP   |
| Loh LC <sup>29</sup>            | 2003-2004 | Malaysia    | Cohort study, retrospective | Non-ESBL-infection                                                    | All kinds of patients                           | Entire hospital               | All-cause mortality, LOS          | Impact of ESBL-KP-respiratory tract infections on hospital mortality, requirement for mechanical ventilation & length stay                                                                                                                                                | KP       |
| Melzer M <sup>30</sup>          | 2003-2005 | UK          | Cohort study, prospective   | Non-ESBL-infection                                                    | All kinds of patients                           | Entire hospital               | All-cause mortality               | Differences in mortality & length of hospital stay & time from bacteraemia to death in patients with ESBL-EC- vs. non-ESBL-EC-bacteremic-infection                                                                                                                        | EC       |
| Song KH <sup>31</sup>           | 2000-2006 | South Korea | Case cohort study           | Non-ESBL-infection                                                    | Patients with spontaneous bacterial peritonitis | Not provided                  | All-cause mortality (28 day)      | Outcomes of ESBL-EC-and ESBL-Ks- vs non-ESBL-EC-and ESBL-Ks-SBP (based on isolation from ascites), impact of ineffective initial antimicrobial therapy on outcome in patients with ESBL-EC- and ESBL-Ks-SBP, risk factors for infection by ESBL-producing microorganisms. | GNB      |
| Bennett JW <sup>32</sup>        | 2004-2008 | USA         | Cohort study, prospective   | Non-ESBL-infection                                                    | ICU-patients                                    | ICU, Surgical ward, Burn unit | All-cause mortality (28 day)      | ESBL types and strain variability, presence of host factors to determine potential role in morbidity and mortality during ESBL-KP-infections                                                                                                                              | KP       |
| Trecarichi EM <sup>33</sup>     | 2000-2007 | Italy       | Cohort study, retrospective | Non-ESBL-infection                                                    | Patients with hematological malignancies        | Entire hospital               | All-cause mortality (28 day)      | Risk factors for mortality in patients suffering from hematological malignancies with concurrent EC-bacteraemia. Focus on impact of ESBL- production & fluoroquinolone resistance by bacterial isolates                                                                   | EC       |
| Tuon FF <sup>34</sup>           | 2006-2009 | Brazil      | Cohort study, retrospective | Non-ESBL-infection                                                    | All kinds of patients                           | Entire hospital               | All-cause mortality (28 day), LOS | Risk factors & mortality rate in ESBL-KP-bacteraemia                                                                                                                                                                                                                      | KP       |
| Kang CI <sup>35</sup>           | 2008-2009 | South Korea | Cohort study, retrospective | Non-ESBL-infection                                                    | All kinds of patients                           | Entire hospital               | All-cause mortality (28 day)      | Risk factors of ESBL-EC among community-onset bacteraemia, treatment outcomes                                                                                                                                                                                             | EC       |

|                                | Years     | Country     | Study design                | Control group      | Study population                  | Setting                                           | Outcome definition                                                 | Main objective                                                                                                                                                                                                          | Pathogen |
|--------------------------------|-----------|-------------|-----------------------------|--------------------|-----------------------------------|---------------------------------------------------|--------------------------------------------------------------------|-------------------------------------------------------------------------------------------------------------------------------------------------------------------------------------------------------------------------|----------|
| Pena C <sup>36</sup>           | 1996-2003 | Spain       | Cohort study, retrospective | Non-ESBL-infection | All kinds of patients             | Entire hospital                                   | All-cause mortality (28 day)                                       | Risk factors for mortality among patients with EC- infections                                                                                                                                                           | EC       |
| Tumbarello M <sup>37</sup>     | 2006      | Italy       | Cohort study, retrospective | Non-ESBL-infection | All kinds of patients             | ICU, Medical ward, Entire hospital, surgical wide | All-cause mortality (21 day), LOS                                  | Clinical & economic impacts of ESBL production, inadequate Initial Antibiotic Therapy of EC-BSI                                                                                                                         | EC       |
| Kang Ci <sup>38</sup>          | 2006-2009 | South Korea | Case cohort study           | Non-ESBL-infection | All kinds of patients             | Entire hospital                                   | Attributable mortality, all-cause mortality (28 day)               | Impact of ESBL-producing bacteraemia on outcome in patients with hematologic malignancy.                                                                                                                                | EC, KP   |
| Wu YH <sup>39</sup>            | 2009-2012 | Taiwan      | Cohort study, prospective   | Non-ESBL-infection | All kinds of patients             | Medical ward                                      | LOS                                                                | Host-related risk factors for community-onset UTI due to levofloxacin- or cefazolin-nonsusceptible isolates or uropathogens with ESBL production, clinical impact of UTIs due to antimicrobial-nonsusceptible pathogens | GNB      |
| Rodriguez-Bano J <sup>40</sup> | 2004-2006 | Spain       | Case cohort study           | Non-ESBL-infection | All kinds of patients             | Entire hospital                                   | All-cause mortality (14 day)                                       | Epidemiology & risk factors (focus on previous antimicrobial use) & mortality rate for patients with ESBL-EC-COBSI                                                                                                      | EC       |
| Gürtneke S <sup>41</sup>       | 2008-2011 | Germany     | Cohort study, retrospective | Non-ESBL-infection | All kinds of patients             | Entire hospital                                   | All-cause mortality, LOS                                           | Distribution of ESBL genotypes, hospital mortality in cases of ESBL-KP-BSI                                                                                                                                              | KP       |
| Oh MM <sup>42</sup>            | 2006-2011 | South Korea | Cohort study, retrospective | Non-ESBL-infection | Patients after Prostatitis Biopsy | Entire hospital                                   | LOS                                                                | Impact of ESBL-positive-strains on clinical course & progression to chronic prostatitis in patients with postbiopsy acute prostatitis.                                                                                  | GNB      |
| Leistner R <sup>43</sup>       | 2008-2011 | Germany     | Cohort study, retrospective | Non-ESBL-infection | All kinds of patients             | Entire hospital                                   | All-cause mortality, LOS                                           | Financial disease burden attributable to ESBL-positive species in cases of EC-and KP-BSI                                                                                                                                | EC, KP   |
| Lin JN <sup>12</sup>           | 2005-2009 | Taiwan      | Case cohort study           | Non-ESBL-infection | All kinds of patients             | Emergency Room                                    | Attributable mortality, all-cause mortality (28 day), LOS, ICU-LOS | Clinical & microbiological characteristics, risk factors for acquisition of infection, prescription of initial empirical antibiotics mortality rate of infection                                                        | GNB      |
| Ku NS <sup>44</sup>            | 2006-2010 | South Korea | Case cohort study           | Non-ESBL-infection | All kinds of patients             | Entire hospital                                   | All-cause mortality (28 day)                                       | Clinical usefulness of breakpoints for treatment of Enterobacteriaceae-bacteraemia, (focus on EC- and Ks-bacteraemia): CLSI 2009- vs. CLSI 2010-guidelines.                                                             | EC, KP   |

|                             | Years     | Country     | Study design                | Control group                                                         | Study population                                             | Setting         | Outcome definition                                   | Main objective                                                                                                                                                                                                                        | Pathogen |
|-----------------------------|-----------|-------------|-----------------------------|-----------------------------------------------------------------------|--------------------------------------------------------------|-----------------|------------------------------------------------------|---------------------------------------------------------------------------------------------------------------------------------------------------------------------------------------------------------------------------------------|----------|
| Anunnatsiri S <sup>45</sup> | 2005-2006 | Thailand    | Cohort study, retrospective | Non-ESBL-infection                                                    | All kinds of patients                                        | Entire hospital | All-cause mortality, LOS                             | Incidence of ESBL-EC-septicemia, factors associated with infection & clinical outcomes                                                                                                                                                | EC       |
| Kang CI <sup>46</sup>       | 1998-2002 | South Korea | Case cohort study           | Non-ESBL-infection                                                    | All kinds of patients                                        | Hospital-wide   | All-cause mortality (28 day)                         | Risk factors for mortality & treatment outcome of ESBL-EC- and ESBL-KP-BSI                                                                                                                                                            | EC, KP   |
| Raviv Y <sup>47</sup>       | 2004-2007 | Israel      | Cohort study, retrospective | Control group: non-ESBL-infection, second control group: no infection | patients with lung transplantation                           | Not provided    | All-cause mortality (28 day)                         | Outcomes of lung transplant recipients infected by CRKP and ESBL carbapenem-sensitive KP (referred to MDR-KP)                                                                                                                         | KP       |
| Kim HJ <sup>13</sup>        | 2005-2010 | South Korea | Cohort study, retrospective | Non-ESBL-infection                                                    | All kinds of patients                                        | Medical ward    | All-cause mortality (28 day), LOS                    | Clinical outcome of patients with biliary tract infection: ESBL-producing bacterial isolates vs. non-ESBL-producing-bacterial isolates, predictors of poor prognosis, impact of ineffective antimicrobial therapy on clinical outcome | EC, KP   |
| MacVane SH <sup>48</sup>    | 2011-2012 | USA         | Cohort study, retrospective | Non-ESBL-infection                                                    | All kinds of patients                                        | Entire hospital | Attributable mortality, all-cause mortality, LOS     | clinical & economic outcomes of patients with ESBL-EC- and ESBL-KP-UTI vs. non-ESBL-EC- and non-ESBL-KP-UTI                                                                                                                           | EC, KP   |
| Abhilash KP <sup>49</sup>   | 2007      | India       | Cohort study, prospective   | Non-ESBL-infection                                                    | All kinds of patients                                        | Entire hospital | All-cause mortality (14 day)                         | Prevalence & risk factors & outcome of antibiotic treatment among hospitalised patients with ESBL-EC- and ESBL-Ks-BSI                                                                                                                 | GNB      |
| Shanthy M <sup>50</sup>     | 2006      | India       | Cohort study, retrospective | Non-ESBL-infection                                                    | All kinds of patients                                        | Entire hospital | All-cause mortality, LOS                             | Prevalence & impact on clinical outcome of ESBL-production among nosocomial isolates of EC & KP                                                                                                                                       | EC, KP   |
| Han SB <sup>51</sup>        | 2009-2013 | South Korea | Cohort study, retrospective | Non-ESBL-infection                                                    | Children (immunocompromised, with cancer, neutropenic fever) | Pediatric ward  | Attributable mortality, all-cause mortality (28 day) | Clinical outcomes of ESBL-EC- and ESBL-KP-bacteraemia & their antibiotic susceptibilities                                                                                                                                             | EC, KP   |
| Lee S <sup>52</sup>         | 2009-2011 | South Korea | Cohort study, retrospective | Non-ESBL-infection                                                    | Patients with Acute Pyelonephritis                           | Entire hospital | All-cause mortality (14 day), LOS                    | Impact of ESBL on clinical outcomes of Acute Pyelonephritis treated with empirical ceftriaxone (which was inappropriate for ESBL-producing organisms)                                                                                 | EC       |
| Artero A <sup>70</sup>      | 2013-2015 | Spain       | Cohort study, prospective   | Non-ESBL-infection                                                    | Elderly                                                      | Medical ward    | All-cause mortality, LOS                             | Identify clinical factors to predict ESBL-EC among elderly patients with UTI admitted to hospital in a high rate setting of ESBL-EC                                                                                                   | EC       |

|                                   | Years     | Country  | Study design                | Control group      | Study population                                                                                        | Setting                                      | Outcome definition                | Main objective                                                                                                                                                                                               | Pathogen         |
|-----------------------------------|-----------|----------|-----------------------------|--------------------|---------------------------------------------------------------------------------------------------------|----------------------------------------------|-----------------------------------|--------------------------------------------------------------------------------------------------------------------------------------------------------------------------------------------------------------|------------------|
| Chen IL <sup>71</sup>             | 2004-2015 | Taiwan   | Cohort study, retrospective | Non-ESBL-infection | Neonates                                                                                                | Neonatal ward                                | All-cause mortality               | Compare the clinical characteristics & laboratory data of preterm babies with EC BSI: survival vs. nonsurvival groups, ESBL vs non-ESBL groups, determine the predictive factors of EC BSI in preterm babies | EC               |
| Islas-Munoz B <sup>72</sup>       | 2016-2017 | Mexico   | Cohort study, prospective   | Non-ESBL-infection | Cancer patients                                                                                         | Oncological ward                             | All-cause mortality (28 day)      | Evaluate the clinical epidemiological characteristics & risk factors associated with mortality in cancer patients with BSI-special emphasis on MDR bacteria                                                  | GNB (and others) |
| Ma J <sup>73</sup>                | 2012-2015 |          | Cohort study, retrospective | Non-ESBL-infection | Patients with hematological diseases                                                                    | Entire hospital                              | All-cause mortality (28 day)      | Evaluate the antimicrobial resistance & clinical features & risk factors for septic shock & death of nosocomial EC-BSI                                                                                       | EC               |
| Man MY <sup>74</sup>              | 2009-2016 | China    | Cohort study, retrospective | Non-ESBL-infection | All kinds of patients, except patients from Burn unit, transplant surgery ward or with thoracic therapy | Entire hospital                              | All-cause mortality (28 day)      | Evaluate the incidence & clinical characteristics & outcomes of patients with KP BSI in critical care & general ward settings                                                                                | KP               |
| Marando R <sup>75</sup>           | 2016      | Tanzania | Cohort study, prospective   | Non-ESBL-infection | Neonates                                                                                                | NICU                                         | All-cause mortality               | Investigate factors associated with ESBL-PE neonatal sepsis & mortality among neonates, characterise selected isolates to show virulence potential & transmission dynamics                                   | GNB              |
| Namikawa H <sup>76</sup>          | 2011-2015 | Japan    | Cohort study, retrospective | Non-ESBL-infection | All kinds of patients                                                                                   | Entire hospital                              | All-cause mortality               | Investigate clinical characteristics of patients with ESBL-EC-BSI                                                                                                                                            | EC               |
| Shi SH <sup>77</sup>              | 2008-2015 | China    | Cohort study, retrospective | Non-ESBL-infection | Patients with pyogenic liver abscess                                                                    | Centre for hepatopancreaticobiliary diseases | All-cause mortality, LOS          | Aetiology & morbidity & clinical characteristics of pyogenic liver abscess caused by ESBL-PE                                                                                                                 | GN               |
| Tanir Basaranoglu S <sup>78</sup> | 2011-2015 | Turkey   | Cohort study, retrospective | Non-ESBL-infection | Children                                                                                                | Pediatric ward                               | All-cause mortality (28 day)      | Assess risk factors for health care associated ESBL-KP-BSI in children, analyze clinical outcomes: ESBL-KP vs. non-ESBL-KP                                                                                   | KP               |
| Razazi K <sup>79</sup>            | 2009-2015 | France   | Cohort study, prospective   | Non-ESBL-infection | ICU-patients                                                                                            | ICU                                          | All-cause mortality, LOS, ICU-LOS | Determine, among ESBL-PE carriers, the prevalence & associated factors & clinical impact of ESBL-PE pneumonia, determine factors associated with ICUAP caused by carbapenem-resistant bacteria               | GNB              |

|                           | Years     | Country      | Study design                | Control group                                                         | Study population      | Setting              | Outcome definition                                                 | Main objective                                                                                                                                                                                                       | Pathogen |
|---------------------------|-----------|--------------|-----------------------------|-----------------------------------------------------------------------|-----------------------|----------------------|--------------------------------------------------------------------|----------------------------------------------------------------------------------------------------------------------------------------------------------------------------------------------------------------------|----------|
| Ray S <sup>80</sup>       | 2014-2016 | India        | Cohort study, prospective   | Non-ESBL-infection                                                    | ICU-patients          | ICU                  | All-cause mortality                                                | Investigate spectrum of microbial resistance pattern in the community and their effects on mortality                                                                                                                 | GNB      |
| Haruki Y <sup>81</sup>    | 2006-2016 | Japan        | Cohort study, retrospective | Non-ESBL-infection                                                    | ICU-patients          | ICU                  | All-cause mortality                                                | Compare the clinical characteristics & outcomes of critically ill patients in an ICU, who were hospitalised for BSI caused by ESBL-EC or non-ESBL-EC.                                                                | GNB      |
| Lin WT <sup>82</sup>      | 2009-2014 | Taiwan       | Cohort study, retrospective | Non-ESBL-infection                                                    | All kinds of patients | Entire hospital      | All-cause mortality                                                | Investigate the clinical manifestations & bacteriological features of culture-proven, GNB arthritis                                                                                                                  | GNB      |
| Buys H <sup>83</sup>      | 2006-2011 | South Africa | Cohort study, retrospective | Non-ESBL-infection                                                    | Children              | Pediatric ward       | All-cause mortality                                                | Describe the clinical presentation of KPBSI, risk factors associated with ESBL-KPBSI, antibiotic susceptibility patterns of the KP isolates & KPBSI mortality including factors associated with in-patient mortality | KP       |
| Lee CC <sup>84</sup>      | 2008-2013 | Taiwan       | Cohort study, retrospective | Non-ESBL-infection                                                    | All kinds of patients | Emergency Department | Attributable mortality, all-cause mortality (28 day), LOS, ICU-LOS | Analyse the impact of ESBL-producing isolates on the outcome of bacteremic patient after controlling for baseline patient characteristics & bacteraemia severity by using a propensity-matched analysis (PSM)        | GNB      |
| Huang YY <sup>85</sup>    | 2011-2013 | Canada       | Case cohort study           | Non-ESBL-infection                                                    | All kinds of patients | Entire hospital      | All-cause mortality, LOS                                           | Determine cumulative incidence of ESBL urosepsis, identify major risk factors for ESBL urosepsis, determine impact of international travel on development of ESBL urosepsis                                          | EC, KP   |
| Komatsu Y <sup>86</sup>   | 2008-2013 | Japan        | Case cohort study           | Non-ESBL-infection                                                    | All kinds of patients | Entire hospital      | All-cause mortality (14 day)                                       | Identify risk factors & clinical outcomes in patients with BSI due to ESBL- or carbapenemase-producing EC, determine prevalence & genetic background                                                                 | EC       |
| Liu MM <sup>87</sup>      | 2011-2016 | China        | Case cohort study           | Control group: non-ESBL-infection, second control group: no infection | ICU-patients          | ICU                  | All-cause mortality                                                | Identify risk factors for ESBL-producing ECBSI among carriers at ICU                                                                                                                                                 | EC       |
| Nivesivat T <sup>88</sup> | 2010-2017 | Thailand     | Cohort study, retrospective | Non-ESBL-infection                                                    | Children              | Pediatric ward       | All-cause mortality, LOS                                           | Determine prevalence, risk factors & clinical outcomes of ESBL-producing EB in paediatric BSI                                                                                                                        | EC, KP   |



|                          | Years     | Country | Study design                | Control group      | Study population                                                | Setting         | Outcome definition                           | Main objective                                                                                                                                                                                                                                                                                                                                                                            | Pathogen |
|--------------------------|-----------|---------|-----------------------------|--------------------|-----------------------------------------------------------------|-----------------|----------------------------------------------|-------------------------------------------------------------------------------------------------------------------------------------------------------------------------------------------------------------------------------------------------------------------------------------------------------------------------------------------------------------------------------------------|----------|
| Cordery RJ <sup>89</sup> | 2004-2006 | UK      | Cohort study, retrospective | Non-ESBL-infection | ICU-patients                                                    | ICU             | All-cause mortality                          | Elucidate specific risk factors for the acquisition of ESBL infection in the ICU; all-cause mortality (in ICU) compared in patients with infections due to ESBL- and non-ESBL-producing organisms                                                                                                                                                                                         | GNB      |
| Daikos GI <sup>90</sup>  | 2003-2005 | Greece  | Cohort study, prospective   | Non-ESBL-infection | All kinds of patients                                           | Entire hospital | All-cause mortality                          | Identify risk factors associated BSI caused by integron-carrying EB; evaluate the consequences of these genetic elements on patient outcome                                                                                                                                                                                                                                               | GNB      |
| Gudiol C <sup>91</sup>   | 2006-2008 | Spain   | Cohort study, prospective   | Non-ESBL-infection | Cancer patients and hematopoietic stem cell transplant patients | Entire hospital | All-cause mortality                          | Assess clinical features, risk factors, molecular epidemiology & outcome of ESBLEC BSI in hospitalised cancer patients                                                                                                                                                                                                                                                                    | EC       |
| Marchaim D <sup>92</sup> | 2006-2008 | Israel  | Cohort study, prospective   | Non-ESBL-infection | All kinds of patients                                           | Entire hospital | All-cause mortality, LOS                     | Define predictors & outcomes of ESBL BSI among patients with bacteraemia due to EB upon hospital admission                                                                                                                                                                                                                                                                                | GNB      |
| Menashe G <sup>93</sup>  | 1997      | Israel  | Cohort study, retrospective | Non-ESBL-infection | All kinds of patients                                           | Entire hospital | All-cause mortality                          | Determine: prevalence of ESBL-P organisms among adult patients with nosocomial EB BSI treated in our institution; association between ESBL production & resistance to other antibiotics; clinical characteristics of patients with nosocomial ESBL-P BSI compared with those infected with non-producing strains; impact of ESBL production on outcome of patients with nosocomial EB BSI | GNB      |
| Ortega M <sup>94</sup>   | 1991-2007 | Spain   | Cohort study, prospective   | Non-ESBL-infection | All kinds of patients                                           | Entire hospital | All-cause mortality                          | Describe source, resistance rate to fluoroquinolone & beta-lactam antibiotics and mortality of EC BSI episodes in a single institution; identify predictive factors for isolation of fluoroquinolone-resistant or ESBL-producing strains.                                                                                                                                                 | EC       |
| Sziglyi M <sup>95</sup>  | 2005-2008 | Hungary | Cohort study, retrospective | Non-ESBL-infection | All kinds of patients                                           | Entire hospital | Attributable mortality, all-cause mortality, | Investigate risk factors for & outcomes of BSI caused by ESBL-producing and ESBL-non-producing KP                                                                                                                                                                                                                                                                                         | KP       |
| Tsai SS <sup>96</sup>    | 2005-2006 | Taiwan  | Cohort study, retrospective | Non-ESBL-infection | Diabetic patients                                               | Entire hospital | All-cause mortality                          | Analyze characteristics, risk factors & outcomes of diabetic patients with community- vs. hospital-acquired KP BSI                                                                                                                                                                                                                                                                        | KP       |

EC = *Escherichia coli*  
KP = *Klebsiella pneumoniae*  
GNB = Gram-negative bacteria  
BSI = Bloodstream infection  
UTI = Urinary tract infection  
ICU = Intensive care unit  
NICU = Neonatal intensive care unit  
ESBL-PE = Extended-spectrum beta-lactamase-producing Enterobacteriaceae  
EB = Enterobacteriaceae  
LOS = Length of stay
