# Supplementary material for: Variation of effect estimates in the analysis of mortality and length of hospital stay in patients with infections caused by bacteria-producing extended-spectrum beta-lactamases: a systematic review and meta-analysis
Source: PubMed Central journal article supplement — BMJ Open. 2020 Jan 20;10(1):e030266. doi: 10.1136/bmjopen-2019-030266 (PMC7044956; doi:10.1136/bmjopen-2019-030266), 2020-01-20
Supplement: bmjopen-2019-030266supp007.pdf [file bmjopen-2019-030266supp007.pdf]

**Supplementary table S5: Risk of bias assessment of case cohort studies according to Newcastle - Ottawa quality assessment scale:**

| Assessment criteria / Study author | 1. Is the case definition adequate? | 2. Representativeness of the cases: | 3. Selection of Controls | 4. Definition of Controls | 5. Comparability of cases and controls on the basis of the design or analysis | 6. Ascertainment of exposure | 7. Same method of ascertainment for cases and controls | 8. Non-Response rate |
|------------------------------------|-------------------------------------|-------------------------------------|--------------------------|---------------------------|-------------------------------------------------------------------------------|------------------------------|--------------------------------------------------------|----------------------|
| Lautenbach, E.                     | Green                               | Green                               | Yellow                   | Yellow                    | Green                                                                         | Green                        | Green                                                  | Green                |
| Apisarnthanarak, A.                | Green                               | Green                               | Yellow                   | Green                     | Green                                                                         | Green                        | Green                                                  | Green                |
| Briongos-Figuero, L-S.             | Green                               | Green                               | Yellow                   | Yellow                    | Grey                                                                          | Green                        | Green                                                  | Green                |
| Stone, P.W.                        | Green                               | Green                               | Brown                    | Yellow                    | Grey                                                                          | Green                        | Green                                                  | Green                |
| Kola, A.                           | Green                               | Green                               | Yellow                   | Yellow                    | Green                                                                         | Green                        | Green                                                  | Green                |
| Tsai, M.H.                         | Green                               | Green                               | Yellow                   | Yellow                    | Yellow                                                                        | Green                        | Green                                                  | Green                |
| Maslikowska, J.A.                  | Green                               | Green                               | Yellow                   | Yellow                    | Green                                                                         | Green                        | Green                                                  | Green                |
| Nguyen, M. L.                      | Green                               | Green                               | Yellow                   | Yellow                    | Yellow                                                                        | Green                        | Green                                                  | Green                |
| Denis, B.                          | Green                               | Green                               | Yellow                   | Green                     | Yellow                                                                        | Green                        | Green                                                  | Green                |
| Chopra, T.                         | Green                               | Green                               | Yellow                   | Yellow                    | Green                                                                         | Green                        | Green                                                  | Green                |
| Skippen, I.                        | Green                               | Green                               | Yellow                   | Yellow                    | Yellow                                                                        | Green                        | Grey                                                   | Green                |
| Apisarnthanarak, A.                | Green                               | Green                               | Yellow                   | Yellow                    | Yellow                                                                        | Green                        | Green                                                  | Green                |
| Tumbarello, M.                     | Green                               | Green                               | Yellow                   | Yellow                    | Green                                                                         | Green                        | Green                                                  | Green                |
| Apisarnthanarak, A.                | Green                               | Green                               | Yellow                   | Yellow                    | Green                                                                         | Green                        | Green                                                  | Green                |
| Kanafani, Z. A.                    | Green                               | Green                               | Yellow                   | Yellow                    | Green                                                                         | Green                        | Green                                                  | Green                |
| Zaoutis, T. E.                     | Green                               | Green                               | Yellow                   | Yellow                    | Yellow                                                                        | Green                        | Green                                                  | Green                |
| Song, K. H.                        | Green                               | Green                               | Yellow                   | Yellow                    | Green                                                                         | Green                        | Green                                                  | Green                |
| Kang, C. I.                        | Green                               | Green                               | Yellow                   | Yellow                    | Grey                                                                          | Green                        | Green                                                  | Green                |
| Rodriguez-Bano, J.                 | Green                               | Green                               | Yellow                   | Yellow                    | Yellow                                                                        | Green                        | Green                                                  | Green                |
| Lin, J. N.                         | Green                               | Green                               | Yellow                   | Yellow                    | Green                                                                         | Green                        | Green                                                  | Green                |
| Ku, N. S.                          | Green                               | Green                               | Yellow                   | Yellow                    | Green                                                                         | Green                        | Green                                                  | Green                |
| Kang, C. I.                        | Green                               | Green                               | Yellow                   | Yellow                    | Green                                                                         | Green                        | Green                                                  | Green                |
| Huang, Y. Y.                       | Green                               | Green                               | Yellow                   | Yellow                    | Yellow                                                                        | Green                        | Green                                                  | Green                |
| Komatsu, Y.                        | Green                               | Green                               | Yellow                   | Yellow                    | Yellow                                                                        | Green                        | Green                                                  | Green                |
| Liu, M. M.                         | Green                               | Green                               | Yellow                   | Green                     | Yellow                                                                        | Green                        | Green                                                  | Green                |

## Risk of bias assessment of cohort studies according to Newcastle - Ottawa quality assessment scale:

| Study author / Assessment criteria | 1. Representativeness of exposed cohort | 2. Selection of non-exposed cohort | 3. Ascertainment of exposure | 4. Demonstration that outcome of interest not present at start | 5. Comparability based on design or analysis | 6. Assessment of outcome | 7. Follow-up long enough for outcome | 8. Adequacy of follow up of cohorts |
|------------------------------------|-----------------------------------------|------------------------------------|------------------------------|----------------------------------------------------------------|----------------------------------------------|--------------------------|--------------------------------------|-------------------------------------|
| Jean, S.S.                         | Yellow                                  | Green                              | Green                        | Green                                                          | Green                                        | Yellow                   | Green                                | Green                               |
| Bhavnani, S. M.                    | Green                                   | Green                              | Green                        | Green                                                          | Yellow                                       | Yellow                   | Green                                | Green                               |
| Blomberg, B.                       | Yellow                                  | Green                              | Green                        | Green                                                          | Grey                                         | Yellow                   | Green                                | Green                               |
| Pena, C.                           | Green                                   | Green                              | Green                        | Green                                                          | Yellow                                       | Yellow                   | Green                                | Green                               |
| Onken, A.                          | Green                                   | Green                              | Green                        | Green                                                          | Grey                                         | Yellow                   | Green                                | Green                               |
| Melzer, M.                         | Green                                   | Green                              | Green                        | Green                                                          | Grey                                         | Yellow                   | Green                                | Green                               |
| Bennet, J.                         | Green                                   | Green                              | Green                        | Green                                                          | Yellow                                       | Yellow                   | Green                                | Green                               |
| Wu, Y.                             | Yellow                                  | Green                              | Green                        | Green                                                          | Yellow                                       | Yellow                   | Green                                | Green                               |
| Abhilash, K.                       | Green                                   | Green                              | Green                        | Green                                                          | Green                                        | Yellow                   | Yellow                               | Green                               |
| Artero, A.                         | Yellow                                  | Green                              | Green                        | Green                                                          | Green                                        | Yellow                   | Green                                | Green                               |
| Islas-Munos, B.                    | Green                                   | Green                              | Green                        | Green                                                          | Yellow                                       | Yellow                   | Green                                | Green                               |
| Marando, R.                        | Green                                   | Green                              | Green                        | Green                                                          | Green                                        | Yellow                   | Green                                | Green                               |
| Razazi, K.                         | Green                                   | Green                              | Green                        | Green                                                          | Green                                        | Yellow                   | Green                                | Green                               |
| Ray, S.                            | Green                                   | Green                              | Green                        | Green                                                          | Yellow                                       | Yellow                   | Green                                | Green                               |
| Panhotra, B.                       | Green                                   | Green                              | Green                        | Green                                                          | Green                                        | Yellow                   | Green                                | Green                               |
| Kim, S.                            | Green                                   | Green                              | Green                        | Green                                                          | Green                                        | Yellow                   | Green                                | Green                               |
| Chayakulkeeree, M.                 | Green                                   | Green                              | Green                        | Green                                                          | Green                                        | Yellow                   | Green                                | Green                               |
| Apisarntharak, A.                  | Yellow                                  | Green                              | Green                        | Green                                                          | Green                                        | Yellow                   | Green                                | Green                               |
| Ha, Y.                             | Yellow                                  | Green                              | Green                        | Green                                                          | Yellow                                       | Yellow                   | Green                                | Green                               |
| Du, B                              | Green                                   | Green                              | Green                        | Green                                                          | Green                                        | Yellow                   | Green                                | Green                               |
| Pillay, T.                         | Yellow                                  | Green                              | Green                        | Green                                                          | Grey                                         | Yellow                   | Green                                | Green                               |
| Kim, B.                            | Green                                   | Green                              | Green                        | Green                                                          | Green                                        | Yellow                   | Green                                | Green                               |
| Kim, Y                             | Green                                   | Green                              | Green                        | Green                                                          | Green                                        | Yellow                   | Green                                | Green                               |
| Marra, A.                          | Green                                   | Green                              | Green                        | Green                                                          | Green                                        | Yellow                   | Green                                | Green                               |
| Schwaber, M.                       | Yellow                                  | Green                              | Green                        | Green                                                          | Green                                        | Yellow                   | Green                                | Green                               |
| Leistner, R.                       | Green                                   | Green                              | Green                        | Green                                                          | Yellow                                       | Yellow                   | Green                                | Green                               |
| Loh, L.C.                          | Green                                   | Green                              | Green                        | Green                                                          | Green                                        | Yellow                   | Green                                | Red                                 |
| Trecarichi, E.                     | Yellow                                  | Green                              | Green                        | Green                                                          | Yellow                                       | Yellow                   | Green                                | Green                               |
| Tuon, F.                           | Green                                   | Green                              | Green                        | Green                                                          | Green                                        | Yellow                   | Green                                | Green                               |
| Kang, C. I.                        | Yellow                                  | Green                              | Green                        | Green                                                          | Green                                        | Yellow                   | Green                                | Green                               |
| Pena, C.                           | Green                                   | Green                              | Green                        | Green                                                          | Grey                                         | Yellow                   | Green                                | Green                               |
| Tumbarello, M.                     | Yellow                                  | Green                              | Green                        | Green                                                          | Green                                        | Yellow                   | Green                                | Green                               |
| Gurntke, S.                        | Green                                   | Green                              | Green                        | Green                                                          | Green                                        | Yellow                   | Green                                | Green                               |
| Oh, M.                             | Yellow                                  | Green                              | Green                        | Green                                                          | Green                                        | Yellow                   | Green                                | Green                               |
| Leistner, R.                       | Green                                   | Green                              | Green                        | Green                                                          | Grey                                         | Yellow                   | Green                                | Green                               |
| Anunnatsiri                        | Yellow                                  | Green                              | Green                        | Green                                                          | Green                                        | Yellow                   | Green                                | Green                               |

|                       |        |       |       |       |        |        |       |       |
|-----------------------|--------|-------|-------|-------|--------|--------|-------|-------|
| Raviv, Y.             | Yellow | Green | Green | Green | Yellow | Yellow | Green | Green |
| Kim, H.J.             | Yellow | Green | Green | Green | Green  | Yellow | Green | Green |
| MacVane, S.           | Yellow | Green | Green | Green | Green  | Yellow | Green | Green |
| Shanthi               | Yellow | Green | Green | Green | Yellow | Yellow | Green | Green |
| Han, S.B.             | Yellow | Green | Green | Green | Green  | Yellow | Green | Green |
| Lee, S.               | Green  | Green | Green | Green | Yellow | Yellow | Green | Green |
| Chen, I-L.            | Green  | Green | Green | Green | Yellow | Yellow | Green | Green |
| Ma, J.                | Green  | Green | Green | Green | Green  | Yellow | Green | Green |
| Man, M.               | Yellow | Green | Green | Green | Yellow | Yellow | Green | Green |
| Namikawa, H.          | Yellow | Green | Green | Green | Yellow | Yellow | Green | Green |
| Shi, S.               | Yellow | Green | Green | Green | Grey   | Yellow | Green | Green |
| Tanir Basarangolu, S. | Yellow | Green | Green | Green | Yellow | Yellow | Green | Green |
| Haruki, Y.            | Yellow | Green | Green | Green | Green  | Yellow | Green | Green |
| Lin, W.               | Green  | Green | Green | Green | Grey   | Yellow | Green | Green |
| Buys, H.              | Green  | Green | Green | Green | Green  | Yellow | Green | Green |
| Lee, C.C.             | Yellow | Green | Green | Green | Yellow | Yellow | Green | Green |
| Nivesvivat, T.        | Yellow | Green | Green | Green | Green  | Yellow | Green | Green |
