# Supplementary material for: Variation of effect estimates in the analysis of mortality and length of hospital stay in patients with infections caused by bacteria-producing extended-spectrum beta-lactamases: a systematic review and meta-analysis
Source: PubMed Central journal article supplement — BMJ Open. 2020 Jan 20;10(1):e030266. doi: 10.1136/bmjopen-2019-030266 (PMC7044956; doi:10.1136/bmjopen-2019-030266), 2020-01-20

**Supplementary figure 4: Pooled risk ratios for all-cause mortality in patients with ESBL bloodstream infections compared to patients with non-ESBL bloodstream infections—all subgroups**

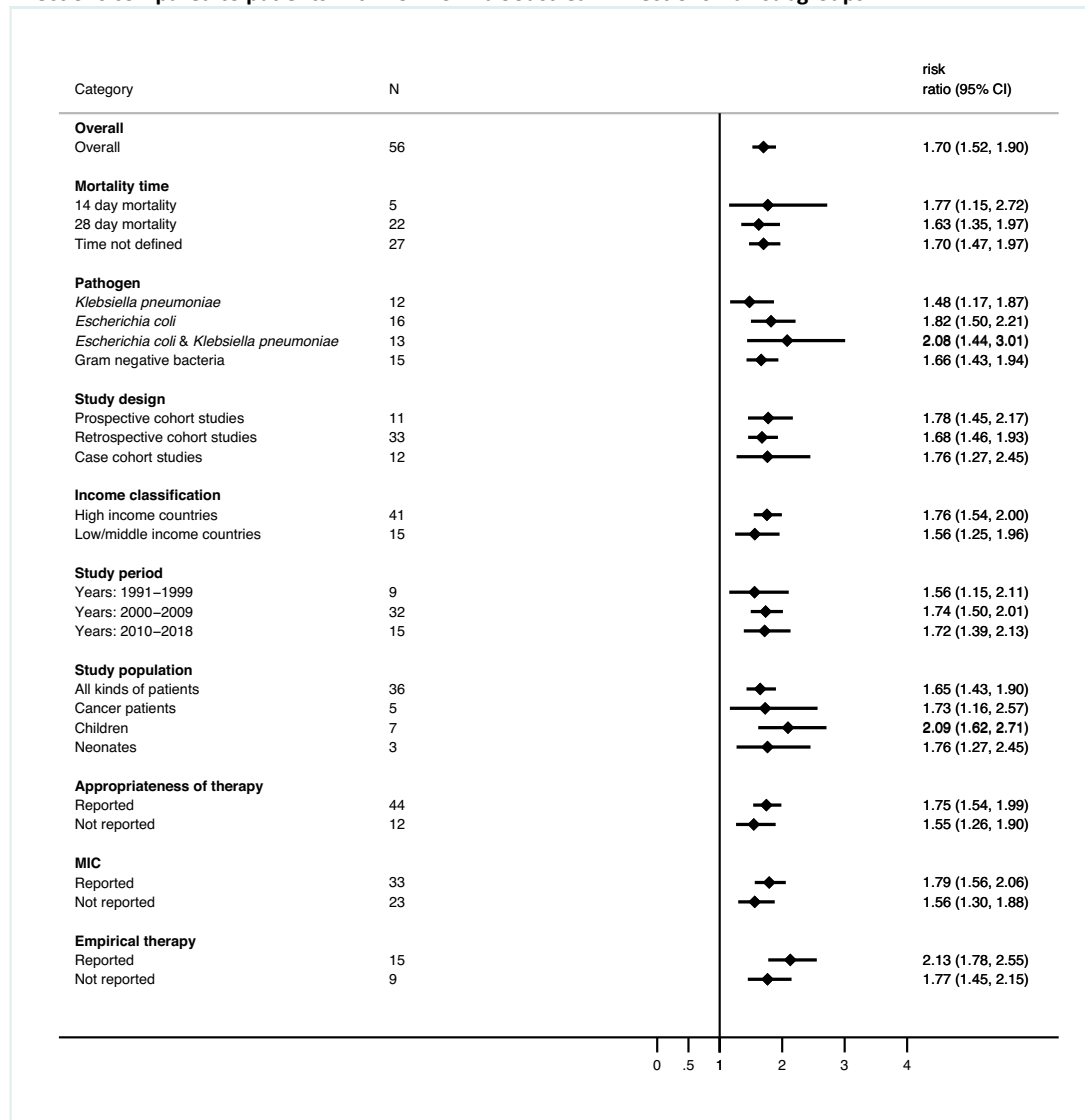

Supplement: bmjopen-2019-030266supp009.pdf [file bmjopen-2019-030266supp009.pdf]
