# Supplementary material for: Variation of effect estimates in the analysis of mortality and length of hospital stay in patients with infections caused by bacteria-producing extended-spectrum beta-lactamases: a systematic review and meta-analysis
Source: PubMed Central journal article supplement — BMJ Open. 2020 Jan 20;10(1):e030266. doi: 10.1136/bmjopen-2019-030266 (PMC7044956; doi:10.1136/bmjopen-2019-030266), 2020-01-20

**Supplementary figure 7: Weighted mean differences in length of hospital stay in patients with noninvasive ESBL infections compared to patients with noninvasive non-ESBL infections**

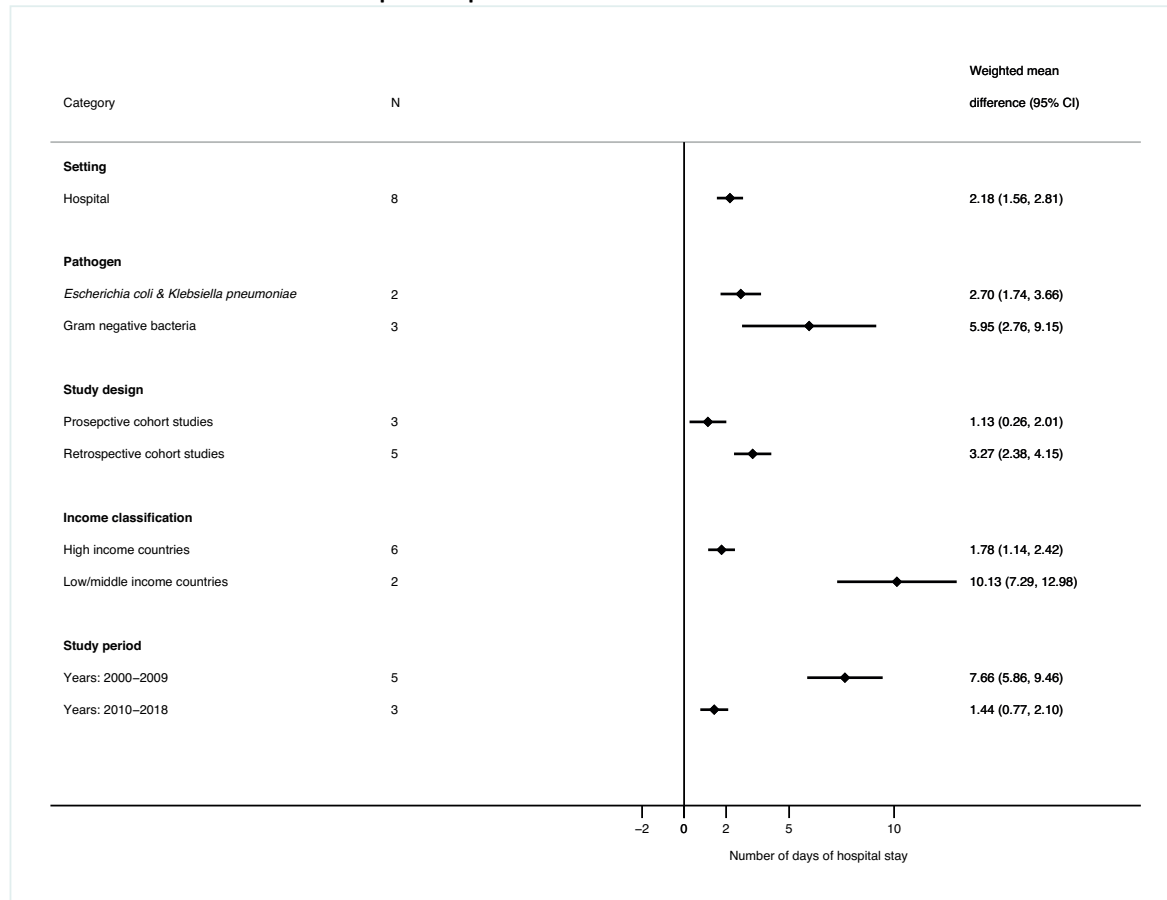

Supplement: bmjopen-2019-030266supp012.pdf [file bmjopen-2019-030266supp012.pdf]
