# Supplementary material for: Variation of effect estimates in the analysis of mortality and length of hospital stay in patients with infections caused by bacteria-producing extended-spectrum beta-lactamases: a systematic review and meta-analysis
Source: PubMed Central journal article supplement — BMJ Open. 2020 Jan 20;10(1):e030266. doi: 10.1136/bmjopen-2019-030266 (PMC7044956; doi:10.1136/bmjopen-2019-030266), 2020-01-20
Supplement: bmjopen-2019-030266supp013.pdf [file bmjopen-2019-030266supp013.pdf]

**Supplementary table S6: Source of heterogeneity among effect estimates in studies on ESBL bloodstream infections in comparison with patients with non-ESBL bloodstream infections assessed using univariate meta-regression:**

| Subgroups / Outcome                  | All-cause mortality | Length of Stay |
|--------------------------------------|---------------------|----------------|
| Mortality time                       | 0.85                | -              |
| Pathogen                             | 0.45                | 0.34           |
| Study design                         | 0.51                | 0.21           |
| Study country                        | 0.22                | 0.09           |
| Income classification                | 0.17                | 0.80           |
| Study period                         | 0.57                | 0.78           |
| Study setting: ICU ward              | 0.78                | 0.97           |
| Study setting: Neonatal ward         | 0.62                | 0.97           |
| Study setting: Pediatric ward        | 0.96                | 0.96           |
| Study population: ICU patients       | 1.00                | -              |
| Study population: Children           | 0.96                | 0.96           |
| Study population: Neonates           | 0.62                | 0.97           |
| Information about therapy            | 0.53                |                |
| Appropriateness of therapy reported  | 0.68                |                |
| Information about outcome of therapy | 0.74                | -              |
| MIC reported                         | 0.28                | -              |
